# Supplementary material
Source: PubMed Central journal article supplement (PMC3604171)
Supplement: NIHMS439962-supplement-10577_2012_9334_MOESM1_ESM.pdf [file NIHMS439962-supplement-10577_2012_9334_MOESM1_ESM.pdf]

**MMUY: RE unit-1**

TATTGATGTATATGTGTATGTATATACATATACACAAACACATACACATACACATAAACACACACACACACACAC  
ACACACACACACACATCATATATATATATGATGTAATTTTAGTAAAAGGAAAAGTAGCTTGCCACAGACAAACCTC  
ACTTAGGTCCTCGATCCATTGGCATAACTTGGGTTCTGGGTACCAGTAGGCAAGGATTAGCCAAGAAGAGGGGCT  
GAGAACTGACACGACCAAACAGAGGGTTGATCTGAATGTAATTTGTCTCAAAGCGAGCACTAGTCTTATAAGTG  
ACTTTTACACAAAATAGAGGAATGCCTACAAAGGACTGGGAGGGACCAATTGGGATAGAATTCAATGTTAACAAAC  
TGTGATTACAAGCAGCCCCCTCCAAGGTTTGCTTAATCTTAGAAGCAATAGGCAAGAGTCTCATGCCCTTACAAT  
GGTTCCTCTTCTAGTCTATCATATAGTACCCTCCACCTAGGCCATTGTAATTCCTGTGCATGGTTGAAACTCAAC  
TATCTATAGTACTAAGTATCTATTCTGCTTGATCCTTATAACATAGCATTCTTATTTGAGGTAATGGTAAATCTT  
GCATATGGTAGTTTGTCTGAGATTTCTAACTCTATGTAGCAGTTAGTAATGCCTGATTTCTTTCACTGTCTCTTA  
CAATACTAGAGGTTAATCTGAATGTACCCAAATAGGCAGCATCCTTACTGAATTCAAAGACCATGGTTTGTCTCAAG  
GACTGCCTAGGAGAGGAATTTATATGTGTGGAATCTAACTTAGCAATATGTCAAACCAATCCTTAGAGGCACCTTA  
CAATAAATCAATATTAAGAGAAAGCACACAGATCCATTTACCGACTAAAGCAAGGGCACTGGAGCATTATTATAC  
ATGTTGCCATGAATACAGGAGACTAAATTTCCATGAATTTTTCGCCTCAGGACCATGTCTAGGCTTTTTGGCCTGTC  
AGGTGGGTCACTACTCGTGTGTTGTAGCAGTTGCTGAAATCAAGGCATGGAGGAAAATGGATGGAAGGAGAGT  
GTTTTGTTAGGTGAGTTAACATAGATTTGGAATGAGGGTATTAACATAGGTTTGTCTCATAACGGTTTGAGATCA  
TTTTATATATTTTCATGCATGTGTGTGGTTGAGTGATATTATTATCTAGGAGAAAGATAGAAAACAAAGTAGAAT  
ACATATCATAAAAAATATAAAATGGTGTATAGCAATTGCTGTATTATTGCCGTGATAAACATTATTACCAAGACAA  
CTAGTAGAAGGAAAGCTTTTTTGTCTTATCATTCCAGAGAGATAAGATTTTCGTCATGATGCCACAACCTCAGCCCTG  
AGGCAGAGCTGGGGCTCCAGAACTCCTCCACATACAAAGATACCTTGACTACCAGATCTGTCATAGCCAAGCTCA  
CAGATGAGATACCCCTTGCAAGCAATACCTGGACTACCTGGGACCTCCAGGGTCCCTGTGCAGGCAAACCTATTTG  
TCTTGCCCTGCTACAGACACATCTTCTTTTTGGCCACTTCTTGGCCTGTGCCAGAGCCACTTTTCCAGATACCATCC  
CACAACCTAGACAGCCTGATTCTGGTAGCTGAATCCCAACCAGTACACAAGCTCATAAAGGAACAGGATCCAG  
TCAGAAACAATAAGCCAAGTTAAAATCTGAGATAAACAGATATCAAGAGGCAAGTGAAAAATTGGAAAAGACCCA  
AAAAAAACACTGAAAGCTTTAAAAAATCAACAAAACCTAAAAAAGAAAACCTATATACATTTAAATTTCTAAAAC  
TAAGAACATAAAACACTAACAAAATATCCAAAATTAAAAAACAAAAGACAAAACAAACACATTTCTAGAACTCTAA  
AAAGAGCCCCTCCAAAAAAACTAAAACCTTTAACAAACCATAAGCCAAAAAGAAAACAAACACAGCAACAAA  
ACAAAACAGATAGAAGGTTTAAAAAATCCTAAAATTTTAAAAGCCCTAAAAAATCCTAATAACCCAAAATAC  
CTTAAAATCCATATGAATTCAGAAACATCCAACCCCCAAAAAATAAACCCAAAAAACCTAAAACCCCCCAA  
ATCCAAAATTATTTAAAAATCATAAAAACTAAAACCTACATAAAGTCCCTAAGTCATTCAATCCCCCTAAAATT  
GTAAAACTCTAAAATACTTATAACACCATAAAGATACCTAAAACCTTAAAAATAGGAAACCCTCAAAAACCTTAG  
CATCTTTAAACAAACCCTAAAAAAGCCCTAAAAAGCTTTCTAAAATAACCTAAAGTGCTTTATATTTAGTATATTTTA  
TCTATCTACCTATCTACCTCTACCTCTCAGCCTATCTTATCTATCTCATCTATCTTCTATCTCATCTATCTATCCAT  
CTATCTATCTATCTATCTATCTATCTATCTATCTATCTATCTATCTATCCATCCATCCATCCATCCATCCATCCATC  
CACCCATCCATCCATCTATCCATCCATCCATCCATCCATCCACCCATCTATCTGAGAGTATCTTGATGGATGACAAA  
GATGCTATGATCTCTTTGGTGACAGGTGTTATATCTGAATGGTTTTGCATACATGGCCATGTTTATAATTTGTCTC  
GGCAAAAAGTCCAAGATCTTTAGGATCAGATGGTGAATAACCTAAAGCCTCTTTTTCAAACAGGGTTTTTGGGTC  
TCTTGTGATAAAAAGGAAGTGTCTGAAGGTCAATTGTGCAGGTGTTGATAGTCTACTATACCATGGGCATACAGA  
GAAAGTCTCTGAGGAAAAAATCCAGGTTGTATCACTCAAATCCAATTGGACAGATAAAGGAAACCCTAGACTCA  
CTATGGTAGATAGTGAAATTTCAAAGCTCCTGGTGAACATTCGCTATTCCTGGCTTGCTTTTTGTACATGACAAG  
CTTCCAGATTTTCTGTAGAAGACAGGCATGGGCCTACAACTTCTAGAATAGATAAAGAAGGTTCTGATTCATTG

AGCAGATGAGGGCATTGTCAAAGATTCTAGGGCAGATGATACAGGTCATAGTGTTCCCTGTCCAGATAAAGAAAT  
TACCATGACTCCTTTGGAAAAATGAGTAGATCCTGAAGCATCTGAAGCATATGGATCTGTTTGTGGACCATTTGT  
GGAGTAATCAAATAATAATTTGGTCTGTAGCATGAAGTTAAGACACCTCTGTAGGTTTAGAGTGATTATGTGTAA  
ATGAATGGATTCAAATGCTTAAGGAAAAAAGTGAGGAACTAAGATGGACAGAAATTGCAAGTTACTGTTGTA  
GTCACTGCATATAACATGTCCTGGGGTAGCTGTTGAAAATGATTGTCCACCTGATGCAAATGATGAATATCCTAGA  
GTCCCCTGGGGAGATGGCAAAGGTTCTATAGAGCCTTATGCAGTTCCTGAAATACTCAGAGGTCCGTGGATAGAT  
CTAAAAGTCCTTGCTTTATTTGGAGCAGGGTCAGTATATCCCTGACACAGCTGGGAAGTTGGTGAGTCTTCTACTG  
TATAGTATGTAGATGTGGACTGAGTTCCTATACCTTGTTTATGTAAAGAAGAATTTAAAAGCCTTTGGAACATGTA  
GAATCTTGGGTAGACCTTTGTGGACATGTGGAGAGACATAAGGTCTCCTGTGCAGAGAGGCAGGGACTCACACCT  
CCAAGAGGAGAATCTGAAGATGCTGGAGTCCCTTGTTCTGAGGAGGAAAGACCTAGAGAATTAGAAGAACATTC  
ATATCATTGGTATGTATTCATCACTGCCTATGATGAGATAGAAAAGTTTCAGAGGCCCTGGGTAATTTTCAGAGGT  
GCTAGATACCCTTAGCCAAATGGGAAAGTCTCTGCACATCCTTGGGTAGAATATGAATGTCTAAAAGTTTTTGGAG  
GTGATGGTGGCAAAGTTCATAGAGTCACTGAAGTTGAATGAGAAGGTTCTATATCCTCTATCACTCCAGGCAAATG  
CCCTAAACTACTCTGTGAGTCTTTTTTTGTGTGTGTGTGTGTGCAATATCCATGTGAAACCTGTTGAATTTCCAG  
ATTTATATGGTTGAAGAAAAATAAATTTGTATGTGCAAAGTCCCTCTTCTGTCCTGAAAATTTTCTGGGCTTTTG  
AAAAGATGAAAAGCTTCTAAAACCATAGGTACAATATGCTCCTGAACACCTAGTAGAGGTGTGAAATCTCCTC  
CTTATGATGGTGAAGGACAAATGGATACTTGACATTTCTGACTAGGTGGGGAAATCCAGTGTTTTTTGGGAAAGC  
TGGGAATCTTTATGCAAAATGTTAGTAAGTTGGAAAAAATCCCATATCTGTTTGCAAAGAAGTTGGAGCATTCAA  
CTATTTGAGCAGATAAAAACATTTTGTGCAGTCCCTTGTTAGATGTGGACAGTTTTAGAGACATTTGGGTAGAAC  
AGAAATGTCAAAGGCCTCTTGGGAAGATGAAGAACTTAGAGTCCCTGTGAAGCTAAAGAACTCACAGAGGCC  
TCTGATCAGATGACACAGATTCTGGTAGCACCTGAGTATATTTGGTAGACCCCAAAGGTCTGGAGTGGGAGGCA  
AAGTTCTCACAGTCTGCACAGTGTGCCAGACAAAGAACTTTGCACAGGCAAATTTCCAATTGCAACTGTTGAGAT  
ATGTACTTCCCTATTATGGCTTGTGCAGATAAAGAATGCCCTCTGTGGCCTGAGCAGATGTGGAATACCCTATAG  
TACTTTCTTAGATTTAGTCACTTTAGACACCTTTCTTCTGATAGACAAGAATCCCACAGTTCCTTACTCAGATCTCA  
AAGATGATGGTGTCTGTAGCTATGTAGTAAGATTCAGATGCAGTCCAGCACATCTGTAAGTGTCTGAAGTCTC  
TCGGAAAGATGGAGCATATTCATTTGTTTCTGATCTAGCTGGGCAAGGAGCTGAATGCAGTAGAGCCCTGTGAGT  
AGGCCTTGAAGTGTGTCATTGCCTGGGCTGAGATGGAAAGTGCCAGAGGCCCCAGGGCTGATTGCAAATGTCC  
TAGAATTTCTGGACCAGATGAAAATATTTCTGCACCACCTTTAGGAAAAGATGAATGTCTACCAGTTCTTGAGGT  
GATGGTGGCAAAGTTCATAGAATTGGCAAAGCAGATGGAGAAGTTTCTATATCCTTCATTACTTGAGGCAATGGG  
CCCACAGTAGTCTCTGTGCTTTACATTGTCCATTCCCAATATCCTTGTGGATTCTGCCAAAGTTCTACATACCTT  
TGGATGGATGACAAAGAAATTTGCATAGTCAAAGTTCTTTTGCAGCTGTGGGACATTCCTTAGACTTTAGAGAGG  
TCAGAAAATATCCTTGAAACTCTGGACTAGAAAGAGGGTGATCCTGAGTACCTAGTACAGATGATGAGTATGTTAC  
ATCTCGTGATGAATGATGAAATGGATTTTTGAGATTTCTGGCGAGGTAGGAACAGACCAATGAACCTTGAAAAAG  
CTGGGGATTTTTGTCCAAATGTTAGAAAGAGGAGAAAATCTCATAGCTTCTGGCAATATGTTGGATGATGCACA  
GTCTTTGGAGAAGATGTCACAGTTTCTACAGACCCTAATTTTGTATGTGGACTGTTTTAGAGACCCTTGCTCAGAAA  
GGGATATTCAAAAGCCTCTATGGAAGACGAAGAGCCTAGAGTCCCGTTGAAGTTAATAAATTCAGAGGCC  
TCTGATCAGATGACAATGACTCTGAGACTACAAGAGTCACTTGTGTAGACCCCAAAGGTCTGTAGTGGTAGCCAA  
AGTTTCCAAGTCTGCTTGCAGACATGGACTTTCATACTGTGGCTTGTGCAGATAAAGAATGCCCCATAGTATCCTG  
AGCATAAGCATAACAACCTATAGATGTTTCTTTAAATTTAGTCCCTGTTTCAGATAAGCAAGTTCCACAATTCCTG  
TTCAAATCTGAAGATGATTGTGTTACCGGTAGTGATGTAGTAAGATCCAGATGCAATCCAGATCTTTTGGAACTTT  
CTGAAGTCCCTTGGGTAATGGAGAATATTCATTTCTTTGAAACTGCTGGGGAAGAAGCTGAATGCAGTACAAC  
CCATTGGCAGATCCTGAGTTATGTGTCACTTGTCTGGGCTGAGATATAAAGTGTCAAAGGCCCTGGATTGATTGC

AAAGGTA CTAGATTCCCTAGACCAGTTGAGAGCATTCTATACTCCTTTAGGAAAAGATGAATGTCTCACAGGTT  
CTCGAGGTGATGGTACTAATTCCTACAGTAGGGAAAGCAGATTTAGAAGATCTGGCATCCTTCTCACTTGAGG  
CAAAGGGTCCAAAAAGTCTCTGTGTGTTTACATTGTCTTAATTCCAATATACCTATGGAATCTGACAAAGGTAATG  
GATTCCTTTGAATGGATGACAAAGAACTTTGAAAATGCAAAGTTTCCATTGCAATTGTTAAGTTTTCTTGTCCT  
TGAGAAGTAAGCAAAGTATTACAGCTACTCGAGTAGGTATTATATGACCCTGACCATCTGGTGCAGATAGGTAG  
TGTTCTGGATAACCTGGCAAATATAAAAAATTTCTTCTGATTTTTCTGGCTAGAAAGGAGAGGTTTATTAGTGTGGG  
GAACATGATGAACATTGTATGTTGAGTACATGGAAAAAATTTGAGAGCCCTCTAGTGTGTAGATTGATATTTGAAA  
GACTTTGTTAGAGATGCAGAGTACCTACAGGTTCTGTTTGGGTGTGAACAGAGACTCTGGACAGATAGGGAAG  
TTCCAGAACCCTTTGTACAGATGGTCATGATCCTACCATTCCCTCTGCAGGTAAGGAAATCCAGAAAGTACTTGG  
TAAGATGGAAAAATTCCTATTTCTGCTTGTCACTTTCTTTATAACCTGGGCTGGACAACAAAAGTTGTTGAACTCC  
CTGGGCAGCTATGGGCTGTCCAAAGTAGATTCTTGATTGAGGTAAGCTTGCCATTACCTGAGTAGATGGTGAG  
AACAATGGAGAGATTTATGCTACAAGAGTTGCTTGTGAATACAAGTTGTCACAGTTTCTTTTCATAGATGGTGGAG  
GGGATTGACATGCTTGTATTGGTGAGGAATGTCCAATAGGCTTTGGGACTTGTAGCAATGTTCTGTATCCATAG  
GACACATGAATACATTCCCAAAGAACCTGAGACGAAAAGAAAAATGTTAATGAATACACTTGGCACACTCTGATGTT  
CCCAGAATCTTTTGGGAAGATGATGACTGCTGGATAGACTGTTGAGCATATAGTGAAAGGCCTAGACATGCCTCA  
ACAGATATGAAAATTTGGTAGACTTCAAAGGTGCTAGATCCCTTGGGACTTCTAAAGAATTCTCTGAGATCATTG  
GTCAGGTTGTGAATATCCTGTATGACTTGAGGGATGTGGCAAAGGGACTGTAGTACTTTGGAATATTGGTGAGGA  
ATCCTGAGATTCTACCATGTTGACTAGTTCCCTCGCTTCTGTTGGAAAGATGCTGAATGTTCTAGAAACCCCGGAA  
TCGTCAGCAAAAAATCCAAAGTTTCTGGACAGGTATAGAATATTCTGGAAGTCTTGTGTTACATCTCACAGTTGTT  
GGAGTACCTGATGTAATTAGTGGAATTTCTGAGCACATGGTACAGAAGACAAAGGTTTACAGTCACTTGGGAA  
GATAACAATGTTTTTTTTGTTGTTTGTGTTTGTGTTTGTGTTTGTGTTTGTGTTTGTGTTTGTGTTTGTGTTT  
TTAGTTTTCTGGTGGATGAAGAATTTTTTTCAGATGGAGATGTTTCTGACTTCTAGGTTTCTAGATTTGGGAGTCA  
CATAACCTCTGTAGAAGGCAGAGGATTTGTAGTCCCATGGAAAGATGGCAAGGTATCTAGAGATTCTACCATGTG  
TGACAAGTACCATAGCTTCTTTTGGAAAGGTGCTGAATGCTCTTAGAATTCCTGAGATAGAAGTAAAAATCCCTCC  
TTCACCTGGACAGGAACAGAATCTTAGAAGCCCTTGGTTACATCTGACATTTGTTAAAGTCCCGTCATTGTGCA  
TGGAGGTTTCTGAGCATGTGTTGCAGTTGATGAAGGTTTACATTCCCTTGGAAAGATAACAATGTTTTCTTAGTCC  
CCTGGTTAGATGGAGAAGATGTAAGAACCTCTGTATCAAATGGTAGATGTCACAGGGTATCTTACAAAAATAGAG  
AACGTGTAGAAGACTTCCAAAAAATAAAAAAAAAAACTGAAAATTTCTCAGGTCCTGGTTTCTAGATGGTGAATT  
TTTTAGGGCCTAGTTTCTAGATTTGGGTAGTCCCATAGCCCCTCTAAGAGACAAAGAATGTTTCTCAGTCCCTGAGT  
AGATGGAAATATTTGAGCCTCCCATGAGCATGTTGAGTAGATCCTAAAGCCCTTGTATTACTTTGTGATAGTTCTA  
CAGTCCCCCGTGGTGATATAGACTGTACAGAATGTCTTATTCTGATTTGATTTTGTACCTTCTTGTGGGATGAT  
ATAAAGACTCTAGTGTTCCTTGTGCCAGTGATGACATTTCAACATTTCTTTGCAAATGGAAATACCCTAGTGTAGAT  
ATTGAAGAATGCAGAGTCTGTTTATAAGGTATGTAAGTGGGCAACATGCTCTTGGGTAGACAAGAAAGTTTCCAC  
AGTCCCTTGGTCATTTGTTGAACATTTCAAGGTATTTTAGATAGAGATGTTTTGGGACTCACCTGAGGAATAGTTGT  
AGCTTTTGTGTTTTTTTTTTTTTTTTTTTTTTTTTTTTTTTTTTTTTTTTTTTTTTTTTTTTTTTTTTTTTTTT  
AAGTGTCTATTTTCTAGAAAGGATCAACAATTAACCTGGTTTTTTTTTTTTTTTTTTTTTTTTTTTTTTTTTTTT  
TTGTTTTTTTTTTTTTTTTTTTTTTTTTTTTTTTTTTTTTTTTTTTTTTTTTTTTTTTTTTTTTTTTTTTTTTTT  
TTCTTCAACCAGACAAGACAAGGAAAATAAACACTCTAGGGTAGATGGAAATAATTGTAAAGCACCTGTTTCTAG  
TATGATAGACATATGACCTTTTGCACAGATGGTGAAGGTCTAAATTTCTTGTGTATATGTACAAGTCTTGACAATA  
GCTTCTAGAAATTAGGAGAAGGCCCTAGAGATACCTGCGTAGATGTGGCCTCTCTTAGAGCTTCTAGGACATGTGTA  
AAAGGTCTAAGAGCCTCATGGGCATTTAGTGAATTTTTAGACCTCCTTGTGTAACAGTGGAAAGTTCCAAGAAAAT  
TTTCTCAGCTAGAGAATTGGATAACAACCTTCTGTGTAGATATTTTCAAGGTGTCATAGACTACTTGTGGGCAACA

GGTTCCAAGGGCCCTTTGGAAGATGAAGTAAAATCCAGAGCTTTTTAGGCATTTGGAATATATTATGGAGACTTA  
TGCAGGCATGGAGAAGGACCAACAGCCCTTGTGCAGGTGGATAAGAATGTGTATTTGGAGAAGAGGGCTGATCC  
TCTTGAGAGATAGAGAAGTTCTCATAGTCTCCTGTGAAGTTTGGGGAGATAATATGAATTCCTGTGCACAGGTAGA  
ATACATGGAATTCCTTCTTAGGCTGTACAGGATGCTACAGACTCTTGTGCGTGCAAATCACATCCGATAGCACCAT  
GTTACATAGGATTGGATCCAGACCCTTCTAACAGATGGAATCTGTCCTAGAACATCTTTGAAGATGTATCATAT  
CCATGAGCCATTTCTAAAGATGGGACTGTGGCTAGAACTCTCTTCTGTAGATTTATCCTGTCCTACAGTCCCTTTAT  
GTGATAGAGTAGTATGCAGAGACTCCTGTACAGGTTTTGGAAATCCTAGAACTTGACATATATGGGGAAATTCTT  
CACAGCCTCTAGTGTGCCAGTGGCAGCTGAGAGGGTGATCCTCTTAGTTGTGTATTCTACGACAAATATTGAA  
ATTGTTTAGCTCACTGGAAGTGTGTTTGAATAATCTCTCAGGTGTTTGGGCCTGCTGACAAATCAAGAGGGCTCT  
TTTGGCTGATAAGAGATATCTGAATAATTCTTGATCAGATCAGGACTTTCTGAAGACCCATTGTTTGGACAGAGCA  
TCTTTCAGTCTTCTACTAGAATGACAATGTTTGTGCACATTTATAGCAGGAGAATGATATAATCTTCTTTCTGTG  
GTAGAGAAACTTAAGAAGTGTCTTTGAATCTGTTCCATAGAGGGGATAATCTTCTTGGTCCCCTGACAGAATGA  
GAATTTATCATAACCCCTGGGGAAGTTGCCTATGGTCTAGTTCACTTTGTGCAGAAGTAAAGTAGAGTCCCTTTG  
GAGGACTTAAGTGAATCTACACATCTTGAGTATGTGTGGAACACTCAAGTGAATTCATGAATGGCAAAGTACT  
TGAGCTCCTTGTGGAATTTTTTCTCTGCTTGGGCAGGTATGAGCTGTGTGAGGCTCACTTAGGAAGTTGTGCAT  
TTAATCCCTTTTACTGTAAGAGATGACATGAGCCATTTTATAATGATAAATGACTTTGAAATCCCTCTTGGTTTAA  
TGGGGAAGTTTTGAAACCCCTTGTTCAGCAGGGTCCGCTCTCAAACCTATTTTACTAAAAGCAGATTGCATATGG  
CACTTTGGGGGAGAAAGGGAACATCTTTGGCTGTCAATTTGAGAGGACCTAGCTCTTCCCCGCTTGGCATCTG  
TCAAACATGTTGAATCTCCTGGGAAGAGGAGGTGGGACTTGATGCATTAGGGACTAATAAGACATCACTGACAT  
TACCGTTAGGCGAAGAAGGTTTGGAGCCCTTTTGTCTGATGGGGCCTGTTGCTTGACAAGAGAGTTCTTCTCAA  
AATGCTTTGGAGGAGAATTGGAAGAATACAGTTATGTAGGGTAGGGAAACAACTTTTGAACCTCTTGGGAAGA  
GGAGGCATTTATGAATTTCTTTAAGCACACGTGGGAAGTCTATGGGATGCCTGGGCAGATGTGCAATGTCCATA  
GAGTCTTGGAACTTTGCGTTAGTTCTCAAACCTTTTTGGTACATAAGGACCTGCCCTGAGAATTTGAAGATCCCA  
GATCTCCTTGGTTAGATTGGGAAGGGTGTAGGGAACCTTGAATGTGTGGGTAAATTACCTGTCCATGTTGTCCAGC  
AGACGATGGCCAGGCACTGTGTTATCTTCTTGAATTTGTGACTGGTATCTCCAGCCCTGTGTTTGAAGATGCT  
GCAGGCACTCTGGCACCCGACTGGTCAAATCCCTAGGTTCTTCAAACCCAGTGGACATAGGCTGGCTTCTTTTCA  
CCTATCTATGCATGGACACAGCAGATGAGGCCACTCATTTCTGGTGGAAAGGTGGTAAAACAGATTGTCTGGTACC  
CTACTCAGTGGGTTACTCATGAACTCAGGAAACATCAGAGAAAGTGTAACTGATCATTTTTTTTTTGTCTCTTTTAG  
CTCCTCAGAGGGCCAGGGTCGTGTAATGGCTAAACGCTTTATAAGAGCTTTGGGTTTCTGTAGCTTGTCTGCA  
ACATGAGCATCAGATTTTTTTGAATGTGTGGTCTTCATAGGGCTTTAGGCACCTGAACTTGTGCCGTTTCTGTATAA  
GGAGCCCTGGAGGCACAAAGTCTTCGGGTCTCTGCTGGTCAAATGCTTCCCCTGTTGGCTAAGGTGTTAAATAC  
AGCTGGGGGTCAAGTGAAGTGGGCCCCAGGCTATTCCCCGATTGGGGTAGGGTATCACCTTTCTTTGGGCGACACT  
GAAGGCAGTACCAGGCTCTAGAAGCAGGGAAACCTGTGGTCTGTGGTCATAGGGTCAAGTCTGTGCTGAGGCTC  
GCTGCCATCTCTCCACATGTCTTGCCATTTAATCATTAAAGAAAATTGTTCAAGAAACATGAAATGGGCGACTGACCC  
TTAAAGGGGCAAGGAATGGACTTGCCAATGGTACTTGCGAGAAAGAAACAATGAAGCAGCATCCTTTAAGAGTG  
ATGCTCTCTCCTGAAAATTTTGGACATATCGTAAGGCAAATCGCACAGAATATAAGTAACAGTGGCCTCAGGAATC  
AAGCAAATTTTGAAGACGGCTGTCTCATGCCTTCTCGGGCCTGTCCGAGCCTAGATAATGGCTACCCCTTGCCT  
GCACAGGCCAATCTGGAACCTGTAGATTGGTTGTCTTGTCTTGCCTGAGGCAATCCTAGGCTGCCTCACTTTGCA  
GTTCTGCTCAGGTAGCACGGCAATCGTCCAAAGTTTCTGAATGAGGAAGGACCCGAGGACTCTCTTCTTAGGGT  
TCAGAGTGCTACCTGGTCTGGTGGCCACTCTAAGGGGTCATGACAAGGAATTGTTGAAGTCAGAGCATGATATGA  
AATAATGGACATGTTCTTAGGAGGCTGTGATCTCAAGTCCATTTTAAACCAGGATAGATCCCTATAACCTGTGGTA  
GTCAGTGAGATTTTCAAGTACGTCAGTTTCCATCTCATAAATGAATGGGTAAGTTTTATCCATACAATTCCTCTCA



TAATTTGTCTCAAAGGGAGCAATAGTCTTATAAGTGACTTTTACACAAAATAGAGGAATGCCTACAAAGGACTGGC  
AGGGACCAATTGGGATAAAATTCAATGTTAAAACTGGGATCAAAGTAGCCTTCCCTAAGGTTTGCTTAATCTTA  
GAAGTCATAGGCAATGGTTTTGCGCCCTTGCAATAGTTCCTTCTAGTCTATCATATAATACCTCGGGCCCCTAGG  
TCATTGCAAATTCCTGTGTATGTTGAAGCTCAAATATCTATAGTTCTAATTATCTATTCTGGTTTCTTATAACAC  
AACCTTTCTTATTCTAGATAATAGTAAATTCTTGCATATGGTAGTAGTTTGCCTGAGAATTCTAACTCTGTGGAAC  
AGATAGTAATGCCTGATTTCTTTCATTATCTCTTACAGTACTAGAGGTAATCTGAATGTCCTGAATAGGCAGC  
ATCCTTGGTGAATTCAAAGACCATAGTTTGGCTCAAGGAATGCCTAGGACAGGAATTCCTAGGTGAGGTATCTAACT  
TAGCAATATGTCAAATCAATCCTTAGAGGCACTTACAAAACCAATATTAAGGGAAAGCACACAGATCCATTTAC  
CGACTAAAACAAGGACATTGGAACATTCATTATACAGGTTACCATGAATACAGGAGACTAAGTTTCCGTGAAGTTT  
TCGCCTCGGGACCATGTCTAGGCTTTTTCGGCTGTCAGGTGGGTCACTACTGGTGTGTTGTAGCAGTAGCTGAAA  
TCAAGGCATTTGGAGGAAAATGGATGGAAGGAGAGTGTGTTTGTAGGTGAGTTAACACAGATTTGGAATAAGGT  
AATTAACATAGTTTTGCTCTCATACGGGTTTGGAGCCATTTTTATATAATTCGTGCATGTGTGAGGTTGAGTGATA  
GTATTCTCTTGCAGAAAGATAGAAAACCTAATATATTACTTATCATAATGAACATAAAGGGGAGTTAGCAATTGCT  
GTATTATTGCTGTGATCAACCACTATTACCAAGGCAACTAGTAGAAGGAAAGCTTTTTTTGTCTTATCATTCCAGAG  
GGATAAGACTTTATCATGATGCCACAACCTTCCCTGCAGCAGAGCTGGTGCTCCAGAACTCCTCCCACATACAGA  
GATATCTTGACTACTAGGAGGTCTGTCATAGCCAAGCTCACAGATGAGATACCGCTTGCCACAATACTGTGCCTAC  
CTGGGACCTCAAGGGGCCAGTGAAAGCAAACCATATCTGTCTTGCCTGGTAGAGATACATTTTCTTCTGGCCG  
AAAACCTCGGCCTGGGCCAGAGCCACTGCTCCAGATCCAGTCCCACAACCATCGACAACCTTTGATTCCCGGAAGCTC  
CACCACAACCAAGTTCACAATCAGCTCGTTGGAGGAACAGGATCCAGTCAGAAACAATAAGGCCAGTAAAAATGTG  
AGATAAACAAATGGTGAGAGGCAAATATAAAAATTGCAAAGACCCAAAAACACTGAAAGTTAAAAAAATCAG  
GAAAACCAAAAAAAGAAAAAAAATATATATATATATATATATACATATATATATATATATATATATATATATAT  
ATATATATATATGACCCTAAAGCCCTAACAAAATATACCAATTTCTAAAAAATAAAATAAAATAAACAATGACAAA  
CAAACAAACAAAACAAAAGCCTTAAAAAATAGAAATTAAAAAAATCCTAAAATCCTTTAAAAGCCCTAAAAGAC  
CCTAATACCCTAAAATACTTTAAAATTCAAAAGAAATCAAGAAACATCCATCCCTCTCAAATATAGACCTCAAGAA  
AACCTAAAATCCCAAAAAATCCAGAAATATTTTTAAATCATAAAAAACTAAAACCTACATAAAAATCCCTGTCATT  
CAAGCCCCCATCCTAAAACTCTAAAATACTTAAAACCTCCTAAAAGACTCCTAAAATCTTAAAAAGAAAACCT  
AAAACACTTTAGAAATCTTTAACCAAACTAAAAGAGACCTAAAAGCTTTTAAAATAACCTAAAATACTTTATATT  
TATCTATCTACCTATCTACCTTTCTACCTATCATCTACCTACCTACTTAACTACCTACCTACCTATCTTATCTATG  
TATCTTATCTATCTATATCTATCTATCTATCTGTCTATCTATCTATCTATCTATCTATCTATCTATCTATCTA  
TCTATCTACCTATCTACCTACCTACCTATCTATCTATCTATATACTTTTTACGGTTTTTCAAGACAGTGTCTCTGTGT  
AATTCTGCCTGTCCTGGAAATCACTTTTTAGACAAGGCTGGCCTTGAATCAGAAATCTGCCTGCCTCTGCCTGCCA  
TATGCTGGGATTAAGCCATTGGACATCACAGAAAGGAGACCCGAAAATACTTAAACAAACAAACAAAAACAAAA  
ATAAAAACAAAAATACAAAACAAAACAAAACAAAACAAAACAAAACAAAACAAAACAAAACAAAACAAAACAAAAC  
ATTAATAATTCTAAAAACTTTAAAATGCCCTAAAATCCCAAAATCTCAAGAACCTAAAAAGACCTTAAAAA  
TTGTAAGCAAAAAAAAAAAAAAAAAAAAAAAAAAAAAACAAAACAGAAGAACAACAAAACAAAACAAAACAAAAC  
AACAAACAACAACAACAACATGTCTTTAAAAGTTGCCTGAAACACTGAGGAAACCTAAAATATTTTTTATAT  
GAAAGAACTTAAAAAAAAAATCCTAAAAGACATAATTAAAATTTACAAACCTAAAGAAAAATCTAAAATCTAA  
AGAGAACTCAAGAAGTCTTACTAAAAAACAAATGAAACAAAGAAACAAAATATAAAAACAACTAATGAAAAAA  
AAAAAAACCTAAAATCTAAAATAACCTTAAAAAATAGAACCCAAAAAAGACTAAAACCGCAATGCCCAA  
AAACCTGTGTAAGTGTGGCATGAGAATAGGCACACACGAATATATTAATGAACAAATGAATTTGAATAAATAAAT  
ACAAATATTTGACTTTAGGCCATGTTTCTGCTATAAGCATTAAAGTTGGCAAAATCAGAGCTGGCAAGAAGGCTC  
AGCAAGTCAAATTTCTTTTTTGTCCCTGGCATCTGGATTTCAAGGACTGAATCCATATGGGAGAAAGGTAGAAT



CTAGAGCCCAGAGGAAAACGTCAACTGCCCCCTACTGTGAGGATTTTCAGGGTCCCAGTCAGGACTTGTGAGAG  
GCAAGCCTGCATCTATTTTATTTCAGAAGATGTGACAGCCATTCATTGACCCCTAGCATGTTCTTTCTGGCCTCCAGC  
AGTATCTTTTTTTTTCTCCTCTGTGGTGAAAAGAATGCTCAAATTCGTGGACAGTTATCCCTAGTGGGCTGATGAGA  
GAACATGAGAGATTACATTAGATGAGTATGGCTAGAGGGATTTCCAGAAAAGGGGGCATGATATGCCTTCAAATT  
ATAGGATCAGTAGAGGAAAATGGCCAGTACTAAAGGGACTGCAGTTGTCTGGGTTCTGATGGAGGAGGGCCGTA  
AGTATATAAAGGCAGCACTGTGCAGTCTGTTTCTCTAGGTTCCGAGCTCAACAGCCTCAGGTTCCAGCTGCTGGT  
CCCACCCCCACATCTCCAGCGGCACCTCAGACATGTTGAGAGGTCTGGGAGGGGACGAGTTGGGGATATGGTGG  
TAGGGTGTATGCCATTGTGGAGGTTCTTCTAACTCTGGATATATCTTTGTGGGAGCCAGGGTTGCAGTTCAGACT  
CCACTATTTTTATCTCAGTTTTTTTTTCTCTGAGTGGCAGAGAGTTAGGTCTCAGGAGTCTGGCTTTTTCCACTGAA  
CTCAAGGTTTCAACAAGGATGGGGGGGATCCTTGGCTAAATTTTTTAGATGAGATTCTATGGCACTTGATTTGGT  
TGAGACCCTGGTCCCCTCTGCCTAAACAACATTTTTAAGGGCAGAAATCACAATCAAATCAAGAGTGTCTCTGGT  
GTTAAACCAACACCAAAAAGCGTGCCATTCCCTAGAGCAGAAAGTTCTTCAAATCTCTTTCTGACATCTACAGACG  
GGTTGTGAATCCTAGTCTTAATTTAGTCCAAATCACAAGACTCATAACGAGGGGAGTGCTAAGAGTCTGTCTCATT  
GTCAGAGTCAATTCAGGGAGACAAACAAGATATACACACAATAAATTACGATAACTGCAACCAGTACCCAATCA  
GACAGCCGAGTAAGCACACTCTTAACTTTGCACCCAGTAACAGAAACAGATGACTGAGTGAGCACACTCTCACTTG  
GCACCCAGTAACAGAAATGGATTGCTGAGTGAGCACCTTTCAATTGGCACACAGTAACAGAAACCGATGGTTGAG  
TGAGACCACTCAATTAGCACCTAGTAACAGAAACAGACGGGTGAGTGAGCACAGTCTCAATTGGCTCCCCGATG  
GGAAATACCCAGGCATCCCTGGAGCTCCCTCAGACCTTCTGGGATGTCTCCAGGTTGGCAGGCAGTTACTCCTGA  
CACGTCTGTGAGTAACACTCCCCTCCATCCAGACAGGGAATTTGTTGCTCTCATGTGCACAGGCTACTGTAAACTA  
AGAATACAAAATTCAAAAAAGCCTGCAGACAAAGACATAGACAAAGACATAGACAAAGGCAGGATCTTACCTCT  
CAGCAGGGATTTCTGAGAAGTGGGGTAGGCCACAAATCTCAGCAAATGAGCACCCACATGTAAGACCACCAAAAG  
CTGGGCTCCACTCAAGTCTAGGATGAGCTGGCCAGCACTCAAAGACTCAAGAGAAAACCCCCCTGATGCCA  
AATTCAAGAGTTTTACTAAATCTAGCTGAGGACAAACTCCTTCTGCCTTGCAGGGCAGGGGAGTTTGACCCTGAG  
CAGTAAGAACAGGGGGTTTTAACAGCTAGATGAAGAATTGGGAGGAGTTGGGAGGAGAGTTCGGAGGAGATGG  
GGAGAGTTGGGAGGAGTTGGGAGTAACTTGGCTATGGGTGGGGAGTAGTCTGCATATCCTCTCTATCTCCATAT  
CCCTATAGGTCTTCTACAATTATCACATCTCTGGCTGTAAGGCACAGAAACAAAAAGGCTTTTTGCTGGCTATAGA  
GAACTAAGAGCTTCTTTCTGAATGATTTTAGAGATTAGGGAAAACAAGGTTGGGGATTGTCCAGGGTTTTACCTT  
CCAGGGAGAAATGCTCTAAGCCTTGGCCTCATATTTCTTTTTGTACCTCATCTTTCTGCATATGAGAGGGACTCTC  
AGCTTTTATCCTTTCTCTGGCAGGGAGAAGCCTACTGACTTTTGTGAGTTTGGGGACTCCTTGAAGCTCTTTGAA  
GGTGTTCCTTCTGCTTAAAGAGCTTCTGGATTTCTTTGAGTTGTTTATCTCTGCTTAAAGGAGCTTCTGTA  
GGGTGGAAGGTTTCAATCCTCTGAGGATACTATTATACAAATGTATATTAAGGGCTTTTGGAGTTATAGTAGTAAT  
AAATTCAATGTTTCTGTATTGTACAGTTAATAATTTATGTCACAAAATAATATTATACTAATAATTTAAACTGT  
GTCTTATACTGCTAATATGGTTTACATATACATGGGAGTTTGGTAGCCTCAGGACTCTGTCCAGGTAGCTGGATC  
ATGTTAATGAATTTTACTCAGATTGCCATTCATTTATTTTTAGTTGCCAATTTCAAGGGCACACCATTTACTTTGC  
GACTACCAGTACTTTAGATTTTTTTTTTATTTTTCATGACAGGGTTTCTGTGTATACCCCAAGCTGTCTGAAACACA  
CTTTGAACAGCAGCCTGGCCTCGAACTCAAATCTGCCTGCCTCTGCCTCCAAAGTGTGGGATTAAGTCCAGT  
GCCACCACCACCTGGCTAGTACTTTAGATTTCTAAATGGTCCCCTCTGGTAAGTTGGAACAGGAAGAAAATTGTAC  
AGTAGTCCCCAAAACACACAATCCTGACTAGGTGAGAAAAAGTATAATCGAGGCTGTGTACCCAACATATCCAGT  
ATAGCCACAAAGGGCATGGTACCTGATACCTGCATTGACATTTTTTTTCGGTCTGTGAGAGATTAGAGAAACTA  
GACAAGGAATAGATGTTTTGTTCAAAGTGGTTTGGGAATCCACACCATTGAATTTCCAAGTGACTGCATTAAGA  
ATGTTTGGCCAGGCATTGTGGGGCTTCCAGCTGAAGTTAAATCACCTTCCATTAGGTAGGTGAGTTTCCCCAA  
CAACTTAAGTATTAGTTCAATTTGGTTTTGGTTTTGTCCAGGATCTCATTATGTAGGTGAGAGTAATCTGGAACAC



ACTGTGTAACCAGGCTAGCCTCAAATCACAGAGGATTCTGACTCTGGAGTGCTTAGGTTTAAACACATGTGCTA  
TTACCACTCCTAGTCCCAATAATTGAAGTTTTAGTGAGTCAAGATTTGTAGCAGGACCGGGGAACCTTGTCTCATA  
AAAGGATTACAGGAATCCAGTTCTTTTTTTTTTTTTATCTATCCAGGCCATAGTTCTTCCATGTTAGTTTTTAC  
ATGCATGGCCAAAATACACCCTTAGCTACTGGACTCTAGTGTCTACCAGGATGCCGCACATGCACACTGTAGTGAA  
GTCTGCTTGGCAGTCCAAGAGCCCTGGAAGCACTCATGAGTCAAAGAGTTTCAAATGAACTCAACTCCTGGAGCT  
TTGGCATTCTATAACCCACATATTCATACCCTATCCCCTTGTTAGTCTGGTGTACAGATCCATGTGCTCTCTTTAG  
TAATATCTTATTATAAGTGCCTTTAAGATTGATTCTGACATAGCTAAGCCTTTGCCAGTGTCCAATGCTCCTAGAA  
AGTCCTTGAGCTGACCATGGGTTTGAATTCAATGTTGCCTATTCAGTGACATTCAGAATTGCCTTTGGTATTACAC  
TATCACTTAGAATAAAAGCCAAATCACTCCCACATACAGGAATTTACAATGGTTTAGGCAGTAGATCTGGCTGTGG  
TTTTAGGGTAATGAGATGGTTAGCTAGAGCCAACTCCCTAATTAGAAATATGACTTGGGTGTGAAAGCCATTGCC  
CTAGGAGTGTAAGACCTCACACCTGGCTTCTAAGACTTTAGGTGACCTTAGATAGGGCTGACTTTGTCTCAGTTGTT  
TTATTGACCAGTTCCTACCTGTCTTTGTGTTACATTCTCTGTTTTGTGTAAGAGCCATTAAGCACCCAGTAACCTC  
ATTTGTACTTTGCCAATGTGTCACCTAACTCCCTATTTCTTGTGTATAAAAAGTTTGATGCTCAATTTGACAAATG  
ACATTCAGATAGTACACAATCTCACGTGTTTCATCTTTCTGTCATTGCGAGACTCTTTGCCATCTCAGACTAGTGACT  
CTTTCCATGCAGAAAGAGGGACCCAGAGGGTCTGTGGCAACAGGACCAAAAACAGATTTCTTGCTATGGGAGCAA  
TGAGAAATGGGCTAATTTTTATTTCTCATGAAAAGAATGGAAGATCTGGATGTCACCTAATGCATGATAGAACT  
CTCTTGACATTTAACACAGACACTGTGATCGTGCCCTTTCCAATCTGCCAGCCAGTATTCTGTCAGGGGTTTTCTAA  
GTTAGTGATATTGAAATTAGAATGTTCCAGGTCCCTAGTTGACAGTCTGATGCAGAAGGCTCCTTTTGAAGGAGC  
TCCATTTTTGCACTTGTAGTGCCAGGTTGTTTATAAGATGTGCTTCCAGTAGGAAATGTAAAAATGGGCTTTAGGG  
GTACATCTGGCCAGAGTTGAAGGATGTTACATATATAGTTATCATTAGCCTGTATGCCCACTCTGAGTGCTACCA  
CTGACTCAATGAAGTTGATCAGCCATAATCTAGGTTTGCAGAGACATATAAAATTATTGACTGTTGTCTAGG  
TTAGAGAATAGTAACTTTTGATCATTGTCCCTGTCCTAAGGGATGGCTCTGGTCGTCTTGTCACTCCACTGTTGG  
GGAAAATGCATATCAAAAATAATGTCTCCCATGTTGGTAGATGGAGTTTGTGATTTTTTTTATACTTGAAAAGTG  
GATGTGACAAATGAAGCTGGGTCCAAGTAAATCCTTATCCCAAATGAGTCAGACAAATACAGTAGATAACAGAAT  
TAGCAGGCTGGGCCACAAAGCAGGGGAAGATCAGTCCAAGCAAGTAGTTAAAAAATAATCTGTTTCATGCT  
GTAGGCAGCCAGCACCTAAAAGATGGTGTGCTGCTCCGGTACACCATCGCAGTAAACAACCACTGAGCAGGTG  
CTAGACCAAATCTGGCACCAACCCCTCCTGAGTGGGTGCATGCAAATTAACATGTCTGCAGACTGACCAACCCTAG  
CAGGAAGCATAGCCCTCCCCAGTGTGGGGTGTATTTAAGCAGTCCCTCCCTGGGTTCTGGGGTTCTGTAGCATT  
GAGGCATTCTGCTCTTAAGCTGTTGAAAAGAATCAACTGTGTTGAATTCTTTTACCAGGAAGAGGTAGGCGAA  
ACATCACCCAGCAATTGTGTTCTCTTTCTTGCCTTTGGGAGGGCCTCAGCAAACCTAGCCCTTTCTGAGCTTCT  
AAAATTTGGAAGTTTTATTTGCTTCTGAGTTGTAGGATCCTCCATCCTCCTTATAGGAAAAAATGTATGAGAATTT  
GCTTCTATAAAAACCCAGCAATGTTATATGTGATTTTTTTTTATTTGTTTTGTTTTAATCTCATGTCTGTCCCAGC  
TGCAGATAGTTTTGTTTGAATTCTAGTGATTCTGAGAGTGAATAAAAAGAAAGAGCTCCTGAGAGGACCTAGG  
GCAGATGCTGCTCCTGCTGCACCTGCTTTTGTATCACAGGATTAATGAGCAATGCTCTTGTGAATGGAGCAAGT  
TTGTGGATTTATTTGTGTCAAAGGGCACTGATGGACATACATTGTTGCAAGGAGAAAAACAAGTGCATAATTTAGC  
ATTCTTAGTGATTAGGTAAGGTTAGGTTATCTGAATTTATCTGAAGGCCAAGCCAAATGAAATGTTGTTTTGATTCC  
TTTTTGGGAATACAAAATCCATGTCTCAAATAATTTATAGATTTTGTGAGTTGCTTTTAAATGTGTTAGTGTTAT  
GAAATATTACATGGCAAGGGAATACATTTGCTGGACCCATGCATGTTGTGACCTTCAGAAATTACACCACGGAACA  
GACCTGGTATAAAGGGAATGATTGGGAGAGGGTAGAGGAGTGAGGAAATGGGGGAGGTATAGAGGCATAGAG  
GCAGAAACAAAACCATTAGGTCAGAAAAATGTGGGGCAAAGAACAGATAGAGGGCTAGCTGAAAACAAAGAGA  
GAGACAGAGCTATAGAAACAAGAACAATGGGAACAGAGAGGTTGGGCCTAGAACAGAGAGAGGGGGCTAATCA  
GTCCTTTTATCCTGCCTCGAAGTTAGCAGTTTAGTTTCTTCAAGAAAGAAATATATTTTCTATGAATTTTGAAGTT

AACAGGAAATATTTTCATCTCTGAGAGCAATGTTAATTTTAAAGTGTTTATAGGAAATTTTTGTGGGACTACTTTCT  
TAAGAACAATATAAGCCTGGTATGTTGTACATACCTGTAATAATACCTACATGGAATGCTGAGATCACCTGGAAC  
CTAAACATTCTAGAACTTCTGGACAATACACAACATACTATGTGCCTATTTCAAAAATGAAATGAAGTGAATAAA  
ATCAACCCAATGTACCTTCTTTATTTGTATCTCTTACCTTTGGAACTAATAAGATAATGAATCAAAAAATAAATAAA  
TTTCAATTATCTGTATGAATGAAAACAATTTTAAATGTTAAGAAGGTTAAAAAATCACTACAGTGATGGGGAGGA  
AAGAGCCTGGGTGGGAAATGGGACAAGAAGGTGAACATGATCAGGTATTATGTGTGTGGGGAACATAACTGAAG  
TGCTGAGGAAAAGCAAAAAGAATGAAACAGGCAACTTTTTGAGGTAGGAGGTGAGAAAACCTCGGTTATATC  
AGAGACCTGGGAGGTGAGAGACCCTAAGGACTCAAAGGGAGGGACCTTAGAAGAAATGCCCTACAGTGGGGAG  
AGGGAACCTGTAGAGTCCTCCTCCAGTGGAGGGACAGGACATCAAGTGGAAGATTGAGTTACCATCCCACAGTA  
AAAAGCTCTAACCCAGAATTGTTCTGTCTGAAAAGAACTGCAAGGAAAAATCATGGAGAAAAGCCTAAAGAAAAG  
GAGATCCAGTGACAAGACCAAATTGTGATAAAGCTCAAGGAGAGGCATCAAGGCCTGACACTATTACTGATGCTA  
TTCTGTGCTCACGAAAATGGGCTTATCGTGACTGCTCTCTGAAAGACCAAACCAGCAGGTGAAAGAGTCAGATG  
CTCAAATTTATATGCAACAAATAGACAGAAGCTGGGAACCCCTGTGGATGAATTGGGGAAAAGCTGGAAGAAGCT  
GAGGAAGAGGTCTACCCGGTAGGAGGACCAACAATCTCAAATAACCTGGACCTCCCAGGATGTCTCAGACACTGA  
GCCAGCAACCAGGCTTCATACACCAGATGATATAAAGCCACCAACACATATACAGAAAAGGACTGCCAGGTCTGG  
ACTCAGTCAGATGAGGTCCATCTAATCCTCAAGGGACTTCAGGCCCCAGGGAGCAGGGAGGTCTGGTGGAGAGG  
GGACAGGATGGTGGGGACATACTTTGGAGATGGGGATTGTGGGCTTGGGGCCCTGGGAGCATGGGGGCATAT  
AGGCAGGAGATATGGGGTGTGGAACAGTAAGAGGGGGAACTAGGAGAAGAATAAAATCTCGACTTTAAAAAAA  
GTATAAGAATAAATTTTAAATAATTCAACTATATTAGTGTGTGGAATTTTCAGTCCACGGGACTATATACCATTCA  
TATTCATTTAGATTTCTTTGGAAGTTAATATAAAGATGCACTTACACTTAAACAAGAAAATGATTAAGATATTTA  
AAAATAAAGAAGTTCTATTTAACTCTAAAGGTATAACTGCTAGTTAACTTTGTAATCACATCACTGGGATTA  
CCTTCTCAGAATCATCAGAATAACAAGGATTAAGAACTTTAAACTCTGTTTCATAGGAAACAAAAAAGTTAGA  
GATTTTTTTATTTGTTTTATATATATACCAGCAAGTGAAAATTTTTCATGCTTCATTTTTCTGAAGATGGGAAAGTAG  
AAGAGTACTTCAGATTATTCTCCATGATGGCTCTTTCAAACATAGACATTTTTTTTTCTCAGTTCACCATCTACCCA  
AAAAGCATATCTTAGTTCTTGGTCCCCAAGTTCATCAAAACCTAAAACAGAAAAGTACCTCTTATTAATAAATTCC  
CAAGGATACAAATATGAAAGATTCTGTGCAGATGATGTATAGGGTAAAGGTTAAGGTCAGGATTAGGATTAGGGT  
TAGTGTTAGGGTTATGTTAATAAAGCAGGATAATTATAGTGTTATTAAGTATGAGGTACATCTGAGGTCAAATT  
CCCATTTTATCATTTTATATCTTTAATAATTCATACAAAGCCATTAGGATTTTATGGATAATAGCAGTCATTTAGTA  
AGAAATAATTCAAAAATAAAGTAGTTAAACTTTATGATTATTAACATATTTAGATTCTAAGGTCATTTTATG  
GACCATGTGCAACATACCTCCATGGACTTCTCATGCATTTCTTTAACTGCTTCCAGGGTCTGGTTCTGACTACATTTG  
GACAGTTTCAATGCTTGTGTTCTTTTTGACAACCTATTCTACAAATGTAAGGAAAACATTAGTATAACAATTCTG  
TTTATTTTTGTTGTTACTGCCATGCAACATGCATGGCAGTCTAACAATAAAACACTAAATGTATATCTAATACTAAA  
ACATTTATGTAAGCAAAAATAAATTCTATATGAAAGTTAAAAGGAATAGTTTTCCAAGTATTTAAAATTTTAAACA  
TATTTACTAAATATATATATATATATTTACAATAATATGAAATAACATTATGCTACCAATTGTGGGGTAGGAATTTT  
TTAATGTGAAAGAGTTTTTATAATGCACAGACTGGCCTTAGCCTCCAAGTCTTATGTTTATAGGCATGCACCA  
TGTATACATGAACTCGGTAAAATCCTAGTCTTGGAAAGCTTAGATTGGTTTTCTCAGATTCCAATCTCAAGCAACAT  
ATAGAAGTAGTAACATAAAGTTCTCATTGTATTCTTTAGGGTTGCGCACAACCTTGATAATTTGCATTTAAAAAAA  
TTAAGACAAGCCCTTACACCTTTTACCTTGGGCTACTACAATCCTGTTTTGCCCTTATTACTGTGATCAATTTT  
TACCTCACATTTGAACTCAAATCATCATAATTAAGTAAAATTACCTCTAATTTGCAATGCTTATCTTTAAAAAAGT  
CACCTGCATACATTTGGAGACAAAGGGTTAATATTGGGTGTCATCTTTGATTTACAGTACTGTTTCAGAGACAGA  
ATCTCACTAAACCTAGAGCTCATATTTATGCTACACCTGGTGGCTACAAAGATCTGGAGATCTTCTTTCTCTGAA  
CTAAATCTGAGATTGGTTGTTTTAAATGCTCACACCACACCAACTTTTTTTGTTGTTGGTGGTGGTTGTTTT

TAGTGTGCTAGTTTGTGTTGTTTATTTTGTGTTGTTGGTGGTGTGCTGTGGGCATTCATCCCAATGCAGGGAATAT  
AAGCTGGGGTCTCCATGCCTACACGGGAGAAAGATTACCAATTAACCATCTTCCAGCCCTGTAAATCAATCTTATT  
GGGCCACATGCAGCATATGACACATTTAGGGATCTTTTCTTCTTAAACTTTCTTCACTCATGGTAGTTTTCTTT  
CTACCAGTGGTTCTCTTCTTACTGGCTCCCTCTCACCAGCTGCCATATGCAGAATTACAAATTTGAAGTACCCTG  
CTGTTCTGTCTTAGACTCCTTATTTACAGGGATGATCACTTTCCCTTGAAATGTCATCCAGAGTCCAATGTTTAAAA  
ACTGTCTTCAATTGGAGTATTTATTATTTATCTTTAGTTCCTATCTCTTCCAGAACTGACTCATAATGGCAGGTTCT  
CAATGCCTTCTGAGGCAAGAATGAATTTGCTGTTCCTTCAAATTGAATACTTTCCAACTATTAACAGTAAATAA  
AATAAATAGTTAATATGATTATCGTTGTCTCAGATCTTACTTAGAAACCAGGTGATGACTCTACAGGTAGAGTAA  
TGGAGACGTGATCTAAAATTGTTTGCTGATATTCTTCCACAGGAAAATTCTTCCAGGGCTGTTGAGATTGTTGTTT  
CCATCCTCTGTTGTTACTAAATCTTTACTAAATTTAGGACTGTAAGAATGATTTACCAAATGAGTTGGTTTTTAA  
TATAACAACAGAGTCCAGGTGAAACCAATAAATAAGCTTTCTCTCTTCTTGAACCTGATATATTGTGGTTTTTTT  
GTTTTTTGTTTTTTGTTTTTTGTTTTTTTTTTTTGTAGTCACTGGTAATCATCTCTTGATCTTTCTGCAAATGTCTG  
CCTCTGAAAATTTATGATCTGGTATACCATAAAATGCCTAGTCGTTTTTATTGATATAGTATGCAATCAATAGTTTA  
TATCTCAGTAAGACTAGAACAGAAGCAAGGATAGATAGATAATGGAACCTAATTTAGTTTCATATGCTCAACTCAA  
GGCTAGTTGTTCCATTCTACTTAGTAATACTAGGTTAATATTAAGTTTTTTTTTATGGTACCAACCACTGATTTTTT  
TTTTCTTATTGAATTTCTGTACATCCATATCAGACTTCTGAAATGTAGTTATATACTGCTCACAAAATTTGTTGTTG  
ATGTTCTTCTGTAAAGCACAGTAACAAAAGCAGGCACATTTTACACCAATATGAAAATGAACACTCAGAACAAT  
TCAATTGAACATTTCACTATAAAAAGAAAAATAGCAGTATAAAATATCTAATGGGAAATCATTATAGATTTTTCC  
GCTAACATATTATCAGAGAGGTTTTTCAATTTACGTTTTAGCTTTTCAAATTAAGAAATATAAACACACACAACACA  
CACGTAACACACACACACACACACACACATATATATATATGTATATATATATATATATATATATATATATAT  
ATATATATACATGTACAAAATTTAATTATATTTCAATGTGTTTTTTTTTATTATTTTCTACCAAATATAAGTTCTAAT  
TTATTTTTCATACATTGCCTTAGTAAAGACAGTGCAAACATGTCAACTAAAATATACAAATTTGCTGCATATGTAA  
TTGTAGTTGTTCTTTTGAATATTGTTAAACATAATAATCCATAAATTACATTCCTAAGACTATGTGCAAGACTTCTG  
TATTTCCACAATGAATGTAAATTAATTTAAATCTCATTAACTGACTTAAAGCAGAAAATAAAATTTTATAGA  
TTTCTATGAATTAGATTTAGTTTGCTGAAGGCATGATGTTATAGGGTTAACTGTTTAGACAAAATCAAAGCCACAC  
ATTTTTACTAAAGAATCAGACATGATATATTTTTTTTAACTTCAGCCACATATAATTTTTTAAATGATACACATTTG  
ACCCTACAAATATAACAACTCTACCTCTCTCGTTCGTTTCGTTTTGCAAATCTTTCTAATTTCTGGTTGCTGCCTTGA  
AAGATTTCTTACATAAGTTTCCATCTTTCTTTATGTGAAGCGTCTTATAAATGTCATCTATATTAATAAATAA  
AGAGTCATTTTGAAGAAAATTAGATGATTCCATGTATTCAAGTAAAAATAGATATAGATAAATTTTATTCAATAAT  
GCTATGGAACTTAAATTAATGATAGATATCACAACATGCTTCATACTTTAGAATACTTAGGGTTTGGTATGTT  
CAGATGAAGGATGTTCAACCTGTAAAGTCTACAGAAATGTTCCACAACATAGAAAAAACAGTCCATGATTTTGG  
ATAAGAAATATCTAATCTTATCTGAATTTTAAATTTCTGTAAGGAAAATAATTTTGAAGCTTCAAGAACAGTTTTCAA  
AGAACAATGCACAAAACAAAGGATCAAAAGTATACTTAATTTCTTATAAGGAAACACTTTTAATAAAGGCTAATT  
CTTTTCAAATCTAAAAAGATGATGCAACTGAAAGAACAACCTTGACTGTGGAAGTGTAGACCCATTGTTTAAA  
ATATTCAATTAATAAAGAGGGCAACCGGTCATATTGGTTCCCATGTTAATCCTAGTATTCTGGAGGAAAAGGCAG  
AGAGATATTTGTGTGTTCCAGGTTAACCTGGTCAACATACTGAGTTCCAGGACAGACAGAGCTACAAATGAGACCC  
TGTCAGAATCAAACCTGCGTTTGATTCTAGCACCTACATAATGTGCACAAATATCTCCAACCTCAGTTCCAGGGGA  
TGTGATGCCCTGTTCTAAATCTGCATGCACCAGGTACATATGTATATGACTCACAGACATACTTATAGGCAAATA  
CCTATATAAATAAAAAATAGATAAAAAATGTTAAAATCTATGTTTAAAAACAATGATCTCCAAGTTTTTTTTTAAATCAAAA  
TAAAATTTTCTAAAGTGAATTGGTAATTATTTTCAAGACATATCTTTAAAAAACACTTGAAGAAAATTTATGG  
TAGGAACTTTTATCAGTAACTGCTGCAGTTAATGAAAATGTAATGCTTCAGAAAATGTTTAGTACCTTTCTAGCA  
TGCACAGTTAGCTTTTCAAGTAACTAGGATGAAGCTATATTTTGGTGTACATGTTTAAATTTCTCACCATACATAGTAC

TAGACAAAATCAGATTATTAATGATTATTCTGCCTCTCTAAATAGAGCAAATCCTTCAGTTGAAAAAATAAATT  
TGGTAAAATGGGTAACCTGAAAGAAGCAAATATTATTTTTAAAATATAATATTGTTTCATGGGGGTAGAGATAT  
GGCTCAGCAGTTAAGAGTACTTCTGTCTTTGCAAAGGACATAGGTTTGGTGTCTAGCACTCATATGGTGGCTCA  
CAACTATCTGACTCCAGTTCCAGGTATCTGAAATAATCAACTGATATCTGAACAACAGGTACACATGTGGTGCACA  
TATATAACTGTAAGCAAAACACTAATACACATAAATAAGTCCAAAAATAGGTATTAGGAGCATTGTTTAGTAAGCC  
ATGTAAGATGTTTTTTTTGTGTGTATGATCCTAGTATTGGAAGCTTAAGCAGGAGATTCCAGTGTAAGACTGC  
ATAGGTTAAATAGGAAAATGCAGGCCAGCCTGAACTACATAATGACACCATATCTCAAAGACAAGTTACTGTCTTC  
TGAGAAAAGCTCACTTAGCATTACAGTTACATATAATTTAAACAGATACTTTAGAATCTGAGTATCATTCTCATTGT  
TTAGTAAGTTGTCTTCCACTTACAGTTACATAATTCATTTACATAAAAAGAAAAAACAATGAAGGGATTGGA  
GAGATGATTACAGCAGTTAAGAGCACTGGTTCCCTTCCAGCTTTCTGAGATTGGAGTACCAAAACCCACAAGGTGGC  
TCACTACCTATAACTTCAGTTTCAGGGGATTCAAGGCCTTCATCTGGCTTCTCAGGTACAAGACACACTAGTTGTG  
CACATACACACGTGAAAGAAAAAACAATAACCATAACATAAAATTTAAAAATAAGTTATAAGGGTTACATTA  
AAGAATTCAGTTTTGCACTGTGCCATATAAAGAAGGAAGCACAGAAGACTCCTAGAAAAGAACTGACTTAATAT  
AAAATTAGCACTGGATCAATGAAAATATGTTTCATGTACAGAATTTTGTATACATATCACTTAGCTATGAGTACATG  
GAACTGTGAAATTGTTACATCTATTTTTTTCTTTTAAAATTCCTTCAAAGCTGTTACAAAAAGCCTCAGTAGTC  
AAGAGGGCCTACTGTGAAAAGAGGAGGTTCACAAAGTACTTTTTTTTTGTTTTTAAGGTAAGTAATGTTACTTCAT  
GCTTATCAAAGGATAATTCATCAAAGATGAACTCACAATTCTGAATATCTATGCTCCAAATACAAGGGCAACCCAA  
TTCATAAAGAAATTTTACTAGAACTCAAAGTACATATTGTACCCCATATAATAATAGTGAGAAACTTCAACACCCCA  
CTCTGAGCAACGCAGAGGTCCTGGAAAAAAGAAATGAAAAGAGACACTGTGAAACTAATGAGAAGTTATGA  
AACTATCGGATTCATCAGATACATATATGTATCTGTACACACACACAGACACACACATCCAAACATGCACACAT  
ATATTGAAGCAAATTCACACACAGTTCTCACTAGATGAAGAGAAATTTTAAAAAATCAACAAACCTTCATG  
ATAATAGTCTTGATAGATTAAGAATTTAAGCACATACCTAAATATAGAAGCAAACCAGAAGCCAACATTAAATT  
AAATGGAAAGAACTTGATGCAATCCCACTAAAATAAGACAAGACAGGACTAGACAAGGCTTCTTACTCTTCCCT  
ACCAATTCATATAGTACTACAAGTTCTAGACAGAGCACTAGAAAACAAAAATTGGTCAAAGGAATAAAAATTG  
GAAAGGAATAAATCAAATATCACTATTAGCAGATAATAAATAGTATACTTAAGTGACCACAAAAATCCATCAG  
AGAACCATAAACCTGAAAACAACTTCAGCAAAGTGCTAGATATACAATTAACCTCAAACAAAACAGTACCTTTC  
TTCTACTCAAAGATAAACAGGATGAAAGGCAATTATGGAAACAACACCTTCAAAGTCACAAATTATAGTTCT  
TGATGTGACTCAAACCAAGCAGGTGAAAGATTTCTATGACAAGAACTTCAAGTCTCTGAAGAAAGAACTGAAAA  
ATCTCAGAAGATGGAAAGGTCTCCCATGGTCATAGATTAAGTTAGTAAAAATGGCTGTCTTCCAAAAGCAATCTG  
CAGATTCCATGCACTCTCCATCAAATTTAACTCAATTCTTCGTAGAGACAGAAAGAGCAATATGCAAAACCATTC  
GGAATATCAAACCTCCAGAATATCCCAAACCTTCTCAACAATAAAGAACCTCAGGGGGAATCATCCCTGACCT  
TAAGCTGTATTATGCAGAAATAGTGATTAATAAATGTATGGTAATGGTACAGAGACAATGCCTTCATGAAATGG  
AGAGATCTAAAATATATCATCCTGTGTGATCTCAAAGGAAAAAACAATGGTATGCACTCACTGATAAGTGGAT  
ATTATCCTAAAAGCTCAGAATACCCAAAATGTAATTCACAGACCACATGAAGCTGAAGAAGAAGGAAGACAAAAG  
TGTAGGTGTTTCAGTCCTTCTAGAATGGGGAACATAATTTCTGATAGGAAATGTGGAGATCAGGGCAGAGAC  
TTAAGGAATGACCATCCAGATTCTGTCCAACCTTTGGATCCATCCCATATACAGAAACCAGGCACAGTCACTATTGT  
GGATACCAACAAGTGCTTGCTGATAGGAGCATAATATGACTGTCTCCTGAGAGGCTCTGCCAGGGCTTGGCAAGA  
ACAGAGGCTGATGCTCACAGCCAACAATCAGACTGATCATGGGGTCCCCAGGGGAGCAGTTAGAGGAAGAAGT  
AAGGAGCTGAAGGGGTTTGAACCTTACAGGAAGAACAACAATATGAACCGAGCAGACAGACCAGAGCACTCAG  
GGACTAAGCCACCAACAAGAGGGGCACCCATGACTCTAGCGGCATATAGAGCAGAGGATGGTATTGTCAGAC  
ATCAGTGGGAGGAGAGGTCCTTGGTCTGTGAAAGCTCCATGCCCCAGTGTAGGCAAATGCCAGGGTAGGGAGG  
TGGAGTATGTGGGTGAGTGAACAGGCTCATAGAAACAAGCAAGTGTCAAATGGAATAGGGATTTCTGGGATT

AAACCAGGAAATGGCTGATATTTGAAATGTAAATAAATACACACTCACACACACACACACACACACACACACACAC  
AGATGGCTTTAACTGTGTCTTCAGGTGGGTTTACATCTAATCACAGGATGATCTAAATTTTTCCCATTCTGCTAGTT  
TTTTGATAAATTAGAGTAAATGTGTCTGCATCTCAATCTCAAATAAAATCATAGTTGCTCTTATCACAACCAAGCTC  
CTCAACCTTTTTCATCACAATACAAATCTAAGACAAATCTAAATATAAAATTCTCCTGGCTGGACAAATATTTTAC  
TGCTACAGCAAGAAGCTCTGGTTTCAATCTTCAGGAATGAAAATAAAAACCCCCAAAATTTAGATATAAAAAATA  
AAGAAGGCATGATTCTCGGGCCCCATTACATTTCTGAGGCTGAGGACTTCAGGTACAAGGCCAGTCCAGGCTGC  
AATTGAGGTTTCAGACAATCCTGAGATATAGAGCTAGAGGTTACTTTCTAAACCAAAAACAACAAATAAATAAAGA  
CAGCCTGGTCTGAATTATGTCTGAATTCAGCACTTCTGAGGCTGAGAGAAGCCTCTAGTATTTGAGGCAGTTTG  
GAACCTATATATAGAAATTTGCGCAATGTGGCATTTCACAACACGTTAAAATGTAGACTGGTCTTCAGTTTCTTTT  
TAATAAATTCCTGGTGGGAAGCAGTTGCACAGAAGAGGGTTTTGTCTGTTTCATCCACTAAGTGAAGTCCAGTTTA  
CTCACACCTCACATCCCCAGTCCCCAAGAATACTTTAGGGTCTCCATTTCTTGGCCTTCTGATTCTGCTAGGAG  
CTAGTCTGTTCAAACCTCTGCACCTACAGTGAAGTTCTCAGTTTTTCTCAGCAGAGGCCTAAGTGGGAAAGGTCGA  
TTGTGAACCTTGAAGTAGCAACTTCTGAGTCCAGTGAAGGTCACCTAATCTCATTACTCTGAAGAAACACCTCCA  
AAACTCCACCTTCATCCCCACCCAGACCCCTAGCTGAACCAGGATTAACCAACAGACAATTGACTACCTCCACTGAG  
ACTTCATCCTACCATGATTCTCAAGAATTTTGTCTCCTCAAGAACTCTTTGTAGCCACCATACTGGGTAACAGGGTT  
TGAACAGCAGGAAAATAATCTCAGCCAAGCCCATTGCTGATTGGCTGTGTTTGCACATGAGTACTAAGGGTAAGA  
GAGGCTCTTCAGTCATCTGTGATTAAGCTTCAAAAAGCGGGTAGTATTTAACTTCCACTACTACCCAGAGGCTT  
TCCATTTTCTAAGTTTGAATACTAACTTGAAGTAAAATAAAATGAACTCAAAGACGACTCTCCTACTTTGTTTC  
AGATGAAGGGACTGTTCTGTGTAACCTAAATTGTTTTTTTTGTTGTTTGTGTTTTGTTTTTTTTGTTCTTTTTTT  
TTTGGTTTTTTTTTTAACTAAAGTGTGTTTGCATGTTTGTATTTATATAACATGTATGACTAGTCCCCTAGAACT  
AGAATAGGATGCCAAATCCCTGGATCTAGAATTAATAATGATTTTGAGAATTATGTGGGTTCCAGGAACTAAACC  
TTGGTCTGTACAAAAGCAACAAGTGTCTTAATTTCTAAGCCATCTTTCCATTCCTATCCTGTGTGTGTTTTAAGGT  
GTGCTGGACATTTCTCACGATAGATGTTTAATTTACTATATAATGGAGAGTATAAAAAATGACTTTGTTAATGTT  
GTCTATTTCCAGAAACAGAAAAACAAACAAACAAACAAACAAACAGCAACAAAAAACATAATTTAATGGATT  
GTGTAATCATAAATAGTTTCAGGATAAAAAATGGAGTGTATACATTTAGTATATGGGTGCATAAGGAGGCCAGA  
TATAGACATCTGTTTTATTCTCAATTATATTCAAATTTCTTTTTCAATTTTCTGTTTTTTTTTCAAGTCAGGGTTTATC  
TGTATAGCTCTGGTTAACCAGGAACTCACCTGTATACCAGGGTGGCATCAAATCAAATCTCCCTGCCTCTGCC  
TTCCAACGTCTGGGATTAAGGCATGTGCCACCACTGACTGACCCAACCTAAAACCTGAGATAGGTTCTCTCTGAAT  
ATGCAGCTAACCAATGCCACTACCTCGGCTAGCCAGCAAGCTGTCTCCACCTACTCAGCACTGGTTGGCAGCCTGC  
ATTTTGAAGTGGATTCTAGGCCCCACTTTTATTTTCAAGAAAAACATTTTACTAAAACAGCCATCTCTCTAGCCAC  
TCTTCAAGGTTTGTCTGTGCTATAGACACTGCAATTTTTGTTGTTTGTGTTTTGTTTGTGTTTTCTTTTTCTAT  
TTCTCTAATCATGGCTAAGTTTAGGCTCCTAAAATGCTTAGTGGTGGTTTTGCTTGTTCCTTACAACAGCAAATTG  
GTTTTCTTGCTCACTTTACAATTTGCAGCTAATTTGGCACACTGGACGAACCTGACATTTCAATTTACTAGTCTTATTGC  
TGTGTTTTGTTCTTTGGTGCTTTTTTTTTTTTTTTTTTAATTTGCTGGGTTTGTGTTTTTTTTGCTGGTTTTCTGTTT  
TGTTTTGTTTTACCACCTGAAGATGAAATTTATAACTTTAATGGTGCTTTACCACCTGAGCTACATCTTTAGTTAAT  
CTTTAGTTTTGAATGTTGGATGAGAAGTTATCTGTGTGATTTTTTAACGAAAACATAATTTCTGTGAAGCCTACA  
ATTATCCCCCTATGCTATAGGTTCTATAGAGATCTGTTCCCTCGTTTGCCTCTTCAAGAAACAGGGAAATATTTCT  
AAAACACATACCTCCAGATTTATCCAACATACTGCCTACTTCATGTCTGTGAAGACAGAACAATAAAAAATTAAGC  
AAGAAATATAGTAGACTGGTAGGCCATTTTTTTTTACCACACACAAAACCTTTACACAGAACCTTCTTAATTTTTAT  
AATAAATATATAATGTTTGGTTTGAACAAATGTCATATGCATATAAAATATATGGTGGACTACCAACTGAACTTG  
AATTATTTACTTTTAACAATTCATACGTTTACACCCCAAGGAGTTTATTCATAACTCTCCACAATTGCCAAGACC  
CTTTTTCCCCAGATAGTCCCCTACTTATTTTTATGATGTTTCTCTTTTCTTGTAGTGTGTCAAAGATCACATGCAG

GTGGTCCTATTGTATGAGTTCCTATGTGTTTGTGATCACAAAGTCTAAAGGATCCCAAGCTGGGCTTGAACCTAAC  
ATATATCAGCATCTGACATTGAAATGCTGATCTTCTGAATCTAGTTTTCCAGTGAAGGTAACACAAACACTACTTT  
TGAAGTACTCTATTGAACTGGCAAAAAAAAAAAGAAAGAAAAAAAAAGAGAAAAAAAAAGAAAAGAATTGAAAA  
TATTACCCCATGTCTTCATCTCCTTTTACTTGAGGCGATATATTTTCATCTTACCAATTGCTGGATTATTTACTGTAT  
TGACAATAGAAAATGTAAACATTTGAAAGTATGCAATATTAGTAATAGTTAATAAAGTACTATCAATTTGAATTTCT  
TTGGAAAACTGCCATTTTGAAGTTTTGAAACAGATTTTAAAAATTAATTAATTAAGTACATCCAGGAAATCTA  
GGACACAAGGAGAAGAAAAACATAAGGATAACAGGTATAGATGAGAAGTAAGATTTCCAAATTATAGGGCCAG  
TGAATATCTTCAACAAAACATAAAAGAAACCTTTCTAACCTAATGAAAGAGATGTCCATGAACATACAAGAAGC  
ATGCAGAACTCCAAATAGTTTGGACCAGAAAAACAACAACAAAAACAAAAATCCCTGCTATCATATATTAATCAA  
GCACCAATGAACAAAAGAAAGAAAGAATATTACAAGCAGTAAGGTAATGGTCAAGTAACATATACAGGAATT  
CCTATCAGAATTACACCTAATTCTCCCCAGAGACTATGAAAGCCATAAGATACACGGTAGATATCATACAGACAC  
TAAGAGAGCAGAAATAAGAGCCAAAGCTATAATATGCAGTAAACTATTTTACCATAGATTGAGAAAACAAGGTA  
TTCCGTGAAAAACAATATTTACACAATATCTTTGAACAAACCAACCCCTTCAAGGGATAATAAAGGGAAAACTCC  
AATATAAGGAGGGAAATCACATGCTAGCAAAAGCAAGATATTAATCTTGAAGTAAACCTAAAAGAAGATAGCTAC  
ATGAACAAAATTCCAACAAAAATAACAGGAAGAAAACAAGACTTTGTCTTAGTATCTCTTAATATCACCATATTCTA  
TTCACCAATTAGAAAGAAATAGACAAACAGACTGGATGTGTAAGCAAGACCCAGCATAACCAGAAAACAACCTCAG  
GGACAAAGACAGACATTTCTCACAGTAAAGGCTGGAAAACAATTTTCTAAGCAAATGTTCCAAAGAAACAAATT  
TGGAGTAGCCATTCTAATATCAAATAAATTTGACTTTCAACCCAATGTTATCAAAAAAGACAAGGAGTGGCACTTC  
ATATTCATCAAAGTTAAAATTTACCAAGATGAATTTTCAATTCTAACATTTATAGTCCAAATGCAATGGCATCCATA  
TTCATATAAGAACTTTAGTACAGCTCAAATGCACATTGCACCACACACAATAATAGCAGAAGACTTCAACAACC  
CTCCTCATCAATGGAAAGATCCTGGAAAGAAAAATTAAAAAAGACACAGTTAAACTAACAGAAGTTATGAAACA  
AATACATTAGTTGATATCTATAGAACATTTTATTTTGAACAAAAATTGTCCATTCTGCTCAGCACCTCATGACGCCT  
TCTCCAAAATTAACAATATAATCAGTCACAAAACATGCCTCAACAGATATAAAAAATATCCAAATAATCTCATACATC  
CTATCTAATCACCAAGGACTAAGGCTGATCTGAAATAATAATATAAATAATTGAAAACCCATGTACACGTAGAAGG  
TGAACAAAAATCCAGTCAGTGATAAATCAGGTAGGGAAGAAATAAAAAAAAAAAAAATAAATGTAAGACTTTTTAG  
AGTTTAAAAAAAAAATGAAGTTACTACATACCGAAAGTTGTGGAACACAACCTAAAGCAGTGTTAAAGGGAAATCTC  
ATAGCTCTGAATGCCTCTAAATAGAACTGGAGAGAAGATACAGTAGTAGGTTGACAGCACACCTAAAACCCCTT  
GAATAACAGGAAGGAAATTCACCCAAGAGGAGTTGAAGGCAGGAACTAATCACACTCAGGGCTGAAATCAAACA  
AGTGGAAACAAGGAACTATAACATAAAATCAAACAACTAGGAGCTGGACCTTTGAGAAAAGTCAACAAGATAG  
ATAAACATAAGCCAGACTAATTACAGGGCACAGGAAAATATCAACATTAACAAAACCAGTAATGAAAAGGGA  
GACATAACAACAGATACTTAGTAAATCCAAAAAATCATCAGATCCTACTATATAAGCCTGTAACCTAGCAAAGT  
GGAAAATCTGGATGAATTGGACAATTATCTAGACAGATGTCAGGTAATAATTTCAATCAGGTTGAGATAAACCCCT  
GTAAACTCTCCATAATCCCCAAAGAAATAGAAGCAGTCATTAAGAGCTCCCCCTCAAAAAAAAAAAAAAAAAAGCC  
CCGTATCTGATGGGTTTAGTACAGATTTCTATCAGGCTTTCAATGAAACACCAATACCAACAATCTTCAATCTATTAT  
GCAAAAAACAAAAGAAATGAACACTACTTAATTTGTTCTATGAAGCCACATTTACTCTTATACCCAAACCATACAAA  
AACCAATGAAGACAGGATACTTCAGACCAATTTAACTTATAAATATTGATGCAAAAATACTCAATAACATCCTGTT  
AAACACAATCCAAGAACACATCAAATGATCATCCTTCATGATCAAGCGGCTTCATCCCAGGGATACAGGAATGGT  
TCAATATATGGGAATCCATCAATGTAATCCAATATGTAAGAATCTCAAGGAAAAAACACAGTATTATCTCATT  
GACGCTGAGGAATCATTTAAAAAATCAACACACCTTCATGATGAAGTCTTGATAGATTGAGAAAGCAAGGCC  
CATAACTAAACATAGTAGCAAACCAGGATCCAACATCAAATAAATGGAGAGAACTCGATGCAATCCCACTAATA  
TATGACAAGGCTTCCACTCTCTCCCTACCTATTCATATAGTACTATAAGTTCTAGCCAGATTAATAGACAACAA  
AAAGAGGTCAAAAAGTTAAAATTTGAAAAGAACAAATGAAAATATCACTATTAATAGGTAATAAGATAGTATAT

TTAGTGACCCCAAAAAATCCTCTAAAGAACCCTTAAGCCTGAGAAACAACCTTTAGCAAAGTGATTGGATATACAA  
TTAACTCAAATAGATCAGTAGCCTTCTCTACTCAAAGGATAAACAGGCTGAAAAGGAAGTTATGGAAGCAACACT  
CTTCACAATAGTCTCATATTTAATAACTTGGTGTGACACGAAAAAAGCAAGTCAAAGTTCTGTAGGACAAGAACT  
TCATGTCTCTGAAGATAGAATTGAAATTCTCAGAAGATGGAAAGATCTCCCATGGCCATAGATTGGTGTCCCAAAT  
AATTTAGTAAAAATGTCTATCTTGCCATAAGTAAGCTCTGATTCCATGCCCTCTCCATCAATATTCAAACCTAATTCT  
TTATAAAGATAGAAAGAGCAATATGCAAAATCATTTAGAATAACGAAAAATCCAGGATATTGTAAACTATTACAA  
CAATAAAGAACTTCAGGGGAATCATCCCTGACCTCAAGCTGTATTATAGAGAAATAGTGATAAAAATGTATAGT  
GACCATAAAGAAAAAATGACTTCAGGAAGTTCACACGCAAACGGATAGGTCTAAAGTATATCATCTGTATGAGG  
TAACACAATCCCAAAGGAAAAAATATGGTATGCACTCACTGATAAGTGGATATTATCCTAAAAGTTCAGAATACCC  
AAAATGTAATTCACAGACCACATAAACCTTAAGAAGGAAGAAAAAAGTGTGCATGTTCCGTCCTTCTCAGAATG  
GGGAACAAAATACTACTGGGAGGAAATATGGAGACAAAGTGCAGGCCAGAGACTGAAGGAACGACCATTGAGA  
ATCTGCCCCACCTGTGGATCCATCCCGTATATAAACACCAGACCCTGTCACTATTGTGGATACCAACAAATGATTGC  
TGAAAGGAGCCTAATAAGGCTGTGCCCTTAGGGGCTCTGCCAGAGGTTGGCAAAAACAGAGGCTCATGCTCACA  
GCCAACAAATCAGACTGATTATGGGGTCCACAGTGGAGGAGTTAGAGGAAGGACTGAAGGAGCTGAAGGGGTTT  
GTAATCTTACAGGAAGAACAATAATGAACCAAGCAGACCCGCCCTCCCCCAGAGCACTCAGGGACGAAGC  
CAGCAAACAAAGAGGGGGACCATGGCTCCAGCTAAATACATAGCAGAGGATGTCCTTGTCAAACATCAGTGAGA  
GGAGAGGTCCTGGTCATGTGAAGTTTGGTGTCCAGTGTAGGCAAATACCAGAGCAGGGACATGGGTGTTGGT  
GGGTGGGGGAACATGCTCATAGAAGCAGAGGGAGGGTGAATGGTAAAGGGAATTTCTGGGGTGAAACCAGGA  
AATGACTAATATTTGAAATGTAATAAACACACACACACACACACACACACACACCTAATATGATGGCTTTAA  
CTGTGACTTCAAGTGGGTTTATATGCAATCACAGGATGATCTAAATTTGGTCCCATTGTTGCTAGCGTTTTGATAA  
ATTAGAGTAAATGTGTTTGCATCTCAATCTCAAATGAAATCATGGTTGCTTTTATCATAACCAAGCTCCTCAATTTT  
TTTCATCATAATACAAATCTAAAGCAGATCTAAAATATAAAGTTTTTCTGGCTGGACAAATATTTTACTGCTACAGC  
AAGAAGCTCTGGTTTCAATCTTCAACAAGGAAAAAATGAATAAAAAACAACAAACAAACAAACAAAAATTTAAA  
TATAAAAAATAAAGAACACATATTTCTCAGGCCAGGTACATTTGTAAGGCTGGGGACTTCAGTTTCAAGGCCAG  
TCAAAGCTGCAGGTGAGGTTTTCAGACAATCTGAGATATAGAGTTAGAGCTTACTGTCCTAAACCAAAACAACAAA  
TAAATAACAACAACCTGGCCTGAATTATGTCTGAAGTCCCAGCACTTCTGAGGCTGAGAGGAGCCTCTGTATTTG  
AGGCAATTGGAGCCTATACATAGAAATTTCCGGAATCTGCCATTTAACAACAGGTAGAGGTAATGAAGACTGG  
TTTTAGTTGTTTTAATGAATTCCTGGCAGGCAGCAGCAGCTAAAAGAAGGTTTTAGTCTGTTGGCTCCACTAAC  
TGACTTCCAATTTACTCACTCCTCACCTCCCCAAGCCCCAAGAAGACTTCCAGGGTCTCCAATTCCTGGCCTTCTG  
CTTTCTGTTAGAAGATAATTCTGTTCAAACCCCTGCCCTTAGCGAAGTTCTCTGTTTTTCTCAGCAGAGAACTAAGT  
GGGAAAAGTTGATTGTGAGCCTGGAAGCAGTACCTTCTGAGTCCAGTGAGGGTCACTCCTCTCCTTACTCCTAA  
AGTAACACCTCCACCCCTCCACCTTCTCCCCACACAGGCCCCAGCTCAAACAGTATTAATCATCTTCAACAGACA  
ATTGACTACCTCTACTGAGACTTCTCCCTACCATGCTTCCACAAGAAGTCCGGCTTGATGACTACCACAAAGCATACT  
GGGTAACAGGGTTTGGATAGCGGGAAAACAATCTCAGCCAAGGCCCTTGTGATTGGCAGTGTGTCACATGTGT  
ACTAAGGGTGAGAAAGGCTCAATCAGTCGTCTGTCATTGAAGAGCAAAAAGGAGGTAGTATTTTAGCTGCCACTA  
CTACCCAGAGGCTTTCCATTTTCCAAGTTTACAATACTAAGTGAAGGCTAAAATAAACGGACCCCAACAAGACT  
CTCCTACTTTGTTTTCAGATGAAGGTGCTGTTGTTTGAATTTTCAATTGTTTTATTTAAGTAATTTGTTTTGCA  
TGTTTGTGTTTATAAACATGCATGTGTGGTGCACATAGAACTAGAAGAGAATTCCAAAACCCATGGATATAGAAT  
TAAAAATGGTTTTGAGCCATTGTGTGGTCTTAGGAACTAAAACCTGGTTCTGTCCAAGAACAACAAGTGCTCTTA  
ATTTCTAAGCCATCTTCCATCCCTGTCTTTGTGCTTTTAAAGGTGTGCTGATCATTTTTCTTGAAAGATGTTTCTTT  
GTACTATACAGCGGAGATTACAAAATTATAACACTTTCTTAATATTGACAATTTGCTCATAGAGAAAAACAACAAA  
GACAAAAACCATCATTTAATGGATTGTGTAATCAGATAAAGAGTATTGTAAAAACTGATGTATATACATTCCA

GTATAAGTATGCATAAGAGGGCGACAAATAGACATTTGCTGCATTCTCAATCACATTCCAACCTCCTTTTTTTTTTTT  
TCAAGGCAGGGTTGTAGTCCTGGACCTCACCTGGTTACCAACTGCTGGGATTATGGCATGAACCACCTCTGACTG  
CCCAAATTTAAAACATGAGACAGGTTCTCTCTGAATCTGCAGCTACCAATGCCACTAGCCTGGCTAGCCAGCAAG  
CTGTCTCCAACACTTTTCACTGGGTTGCAGCCTGCATTTTAAAGCCGATTTAAGACCCCTCCTAATTTATATAC  
TTTCAAATAAAGCACATTACAAAACAGCCATCTCTCTAGCCCCTCTGAGAGGTTTGTCTCTTGTGGTAGCCACTG  
TATATTTTTTTTTATTCTCTAATCATGCCTAAGTTTAGGCTCCTAAAATGCTTATTGCTGGTTTTGCTTGTTCCTTACA  
AGAGCAAACCTGGGTTTCTTGCTCATTTTACAATTTGCAGTTAATTTGGCAAACCTGGACAACCTAACATTTCAATTTGC  
AAGACTTATAACTGTGTTTTGCTTGTGGTAGGATTTTGTAAATTTGGTGCATTTGTTGGTTTCTTTGGGGTTTTT  
ATTGTTATTGTTTTGTTTTGTTTTCTTTGTTTTGTTTTGTTTTGTTTTATTTTTGCCACTGAAGATGAAACTCATCACTTTTA  
AATGGTGATTTACCACTGAGCTACATCTTACAGCTAATCTTGCATTCTAAATGTTTGCTGAGAAGTTATCTCATATGT  
GTTTTAAAGGAAACTACAATTAAGTGAACCCAAAATTATCCCTTTTGTATACAGTCTAGAAATCTGATGCCCTC  
TTCTGACCTCTTTAAAAACAGGCAAATACCTCCAAAACACATACCTTACAGATTTATCCAACATACTGTCTACTTCA  
TCTCTGTGAAGAAAGGAAAATAAAAAAATTAATGCAAGAAATATAGTGGACTGGTAGGCATTTTTCTTACCCACAC  
AAAACCTTTAAAAGAACCTTTCTTTAATTATTTATAATAATATAATGTTTGGTTAAGAACAAATGTCATATATAT  
ATATATACATATATACATATGTATATGTATGTGTAGATATATATATGTATGTATGTATATATATATATATGTATAT  
GTATATATTACATGGTGGAGTATCAAAGTGATCTTGTATCCTTTACTTTTACCAATTCATACATTTACACCCACAGTA  
GTTTATTCACTACTCTCCCACTCTTGCTGAGACCTTGTCTTGCCAGATGGTCCCCCTCTATTTTCATGATTTTTCTC  
CTTTCTTTGTGTGTATATCTTGAAGATCTCAGGCAGGTGGTCATATTATACTAGTTGCTATGTGTTTGTATCACA  
AGGTCTGAAGGACCTCAAGCTGGGCTTGAACCAACATATAGCAGTGTCTGATTTGTATTGCTATCTTCTGAATCT  
ACTTCTCCAGTGAAGGTAATACAAACACTACTTATGAAGTAATCTATTGAGCTGGCAAAAAATATTGAAAATGTTA  
CCCCATATCTTCATCTGCTTCTGCTTGAAGCGATATATTCTCATTTTTATCAAATGCTGGGCTCTATACTGTATTAAC  
AATAGAAAACAGAAACATTTGAAAGGATTCTATATAAGTAATAGTTAATAAAGTACTATCGATTTGAATTTATCTG  
GAAAACTCTCCATGTAAATTTTTGGAAGAGATTTTAGAAAAGGAAATATTTACACCGAGAAAATCCAGGACACAA  
GGAGATGACAAAACCTAAGGATAATAGGTATCAATGACAAGTAAGTTTTCAAATTTAGGGACAGTGAATATATTC  
AACAAAATTATAGAAGAAAACCTCCCTAACCTAAAGAAAGAGTTGCTATGAATATACAAGTAGCCTACAAAACCTC  
CAAATAGTTTTGGACCACAAGAGAAATTTCTTCCATCATATAGAAATCAAACCTCAAATGCATAATAAAAAA  
GAAAAGAAAAGAAGAATATTAAGCACTAAGGGAAAATGGTCAAGTGACTTATAAAGGAAATCCTATCAAAA  
CTATACCTAACTTATCCCCAGAGATTATGAAAGCCATAATATCCAGGGCAGATGTCATACAGACCCTAAGGGAAAA  
GAAATGCCAGACAAGGCTACTAGATGCATCAAAAAATTTACAATAGATTGAGAAAACAAGGTATTCTGTGAAAA  
AAAAACGATATCTACACAATATGCTCGAACAAATCCAGCCCATCAAGTGGTAATAATGGGAAAACCTCAATATA  
AGGAGGGAAATTACACTCTAGAAAAACCAAGAAATTGATCTTGAAGCAAACCTAAAAGAAGAAAGCTACATGAAT  
CACATTCAACTCTAACACAAAATAACAGGAAGCAACAACACTACTTTTCTTAATATCTCATAATATCAGCGGACA  
CAATTCACCAATAAAAAACATAGAATAACAGACAGGATGTTTAAAGCAAGACCAAGCATACTAGAAACAAATCTC  
AGGGACAAATACAGATATTACCTTAGAGTAAAGGCTGGAAAACAATTATCCAAGGAAATGTTACAAAGAAACAA  
GTTGGAGTAGCCATTCTAATATCAAATAAATTCGACTTTCAACCCAAAGTTATCAAAAAAATAAAAGAGGAGGGAC  
ACTTCATATTCATCAATGTTAAAATTTGCCAAAATGAATCCCAATTCTGAACATTTATACGCCAAATGCAATGTCAT  
CCCACTCATAAAAGAACTTTAGTAAAGCTCAAAAACACACATGAATAGAGCATTAAAAGAAACCTTGACTAAAT  
TGGTTTTAGAGACCTGCAGAAAAGATTATGCAGCTTTTTTCCCTTACCTTGTCTGAGTATGGAACACCACAGGG  
AAATTTAACTTACACCTCGAACTCCTCAACTGGGGACCCCCCTTTAACAGAAGCAGGTGGAATGTTTGCAC  
CCTCATGTTTCTTTTTCAGAACTCCCACTAGCTCACTTGAAGGACCTACAACCTGGTCAGAAAAGATGCCTTGGAAAT  
GTTGAAACACAATAAAAACTTAAACAAAACAAAAAAGCATAACGAACCAGAAACCATCTTGGTGCC  
CATAAATTTCAAACAGGAGTACCTGTCTGGTCTGGTGCCACCATTCTGTCAAACCTTGAACCTCAGATCAAAGGAC



TTCCCTGATGATTCTCACAAGCCCTGCTGCCACACCTCCAGTATGTGCCAGTTCTGGCATCCAGCCTGCCATGGC  
CCTGACTGGCCTGGCACTGCTCACACACAGTGGGCACTGCACAGGAACCTCCCTCCCTCCCTCCCAATGGCAAGA  
GGCTCTTTTGTCTCATTCAATGGGCTTCTGAGGTTCTCAATCTTACATATCCTAAAGCTGTGACCTCATGTTGGCTT  
GTTTGGCAGCTGGGCCAGAGGTTTAATTTCTAACTTATAAGATCAGAACTATGTACTAGAAGGAGTGGGAAATG  
TGAGACCACAACATAGAGCGTTTCTCCCTGGAAGGTAAAGCACCTGGACATTCTCCAAGATTGTTTTCCCTGATTTA  
TAAAAATACAGCCAGAAAGAGACTCTATGTTCTCTACAGCCACCAAAAATCCTTTTGGTTTCTGAGCCTTACAGCTA  
GAGATTCAAAATTGGAGTTTGGACAAGGACATCTGGGCAGAGAAGAACAACCTCTCCCATCTCTCCCAACTCCTCC  
AAACTCTCCTCCCAACTCATCCCAATTCCTCAGCTAGCTAATAAAAACCTTCTTCTGTACATCTCAGAGTCATACGC  
CCCTGCCCTGCACAGTGGAAAGGAATTTGCCTTAGCTAGCTGATAATAAAAACCTTGCAGTTTGCATCAGGTATC  
GATTTCTCTCAAGTCATTGGGGTGCTGGCCAGCTCATCCCGGGACTTTACTGGACTTGAGAGGAGGTCCATCTTCG  
GGGTCTTACACATGGAGACCTAAGACCAAAAATCTTCAAATAATATGCAAAAATCAAAAGAGAAGGAACACTATT  
GAATTTGTTCTATGAAGCCAGATTACAATTATATTCAAACCATACAAAAACACAATGAAGAAAGGAAACTTCAGAC  
CATTTTCCCTTATGAATTTGGAAGCAAAAATACTCAATAAAATCACTGCAAACCAATAAAAAGAATACATCAAAACG  
ATCATCCATCATGGTCAAGTAGACTTCATCCCTGTAATGCAGGGATGGTTTAATATATGGAAATTTGTCAACTAAT  
CCTACTATAGAAAACAAACTCAAAGATGAAAACAACATGATCACCTCATTAGATGCTGAGAAAAGCATTGACAAAACA  
CAACACCCATTATAATAAAAAGTCCAGGAAAGGTCAGGAATTCAGGCCATATCTAAACATAAAAAAAAAAATACA  
ATAGACAGCAAACGAGTAGGAAAACATAAACTAAATGAAACAATCTCATTAAAATCAGGGACTAGACAAGGCTGC  
CCTTTTCTTACATCCTATTGAATATAGTAGTTGAAGTCTAACCAGAGCAATTAGACAACAAAAGGAAAACAAT  
GAATAGAAATTGGAAGGAAGAAGTCAAATATCACTATTTCCAGAATATATGATAGCATGTATCAGTGACCCAA  
AAATGCACCAGAGAAAATCGTAACCATATATGACTTCAGTGCAGTAGGTGAATATAAAATTAACCTAAACATATC  
AGTGGCCTTTCTCTACTCAAAGGAAAAAGAGGATGAGAAAAGAAATTTGGGAAAACCTCACCTTACAATACTCACA  
AATAATATAAAATAGCTTGGTGTGACTCTAAATTAGAAAGTGAAGATATATATGATAAAAACCTTCATGTCTCTGA  
AGAAAGAAATGAAACAAGATCTCAGAACATGGAAAGAACTCCCATGCTCATGGATTGGAAGGATTAATATAGTAA  
AAATGGCTGTTCTGCCAAAAGTAGTTTATAGATTCAATATAATCCCATCAAAAATCCAACCTCAATTCTTTACTGAGT  
TAGAAAGGGCAATTTACAAATTCTCCTGGAATTTGAAAAAACAACAAGCAACAACAACAACAACAACAACAAAAA  
CCAACAACAACAACAACAACAACAACAACAACAACAACAACAACAACAACAACAACAACAACAACAACAACAACA  
GAATCACCATGCCTGACCTCAAAGTGCCTACAAAGCAATTGTGATAAACTACATGGTACAGGTATAGTGGTAG  
ACAGGTAGATAAATGAAATAGAACTGAAGTCAGAGAAATAAACCTTTAGTCACTTGATCTTTGACAAAGGAGCTA  
AAACCATCTAGTGGAAAGGAGACAGCATTTTCAACAAATGGTGTGGTTCAATTGGCAGTTAGCATGTAGGAGAA  
TGTAATTGATCTATTCTCATCCCCTGTGCAATGCTCAAGTCTAAGTCGATCAAGGGACTGCACATAAAACCAGAG  
AACTGAAACTTATAGAGGAGAAAGTGGGGAATAGCCTGGAATACATGGGCAAAGGGGGGATATTCTTGAAAA  
AAATACTACCAATGTCTTGTGCTATAAGATTAAAAATGGACAAATGGGACCTCATAAAACTGATAAGGTTATACCC  
AGAAGTTCAAACTTGTAATAAGGAAACATGCTTCACTTTGTCCATAGCAGCCTTTTGTATAATAACAAGAAGCTGA  
AATGAACCCAGATGACTCTTTAGAGGAATGTATATAGAAAATATGGCACATTTACTTAATGAATTACTACACAG  
CTATTAACAACAATGAATTCATGAAATTTTTATACAATGGATGGATCTGGATGATATCTTCTAAGAGAGTTAAC  
CAATCACAACAAAACACACATGATTTACACATTGATGAGTGGATATTATCCCTGAAGCTCAGAATAACCAAGGTA  
AAATGTGCAAAACCCATGAAACTGAAGAAGGAAGACCAAGTGTGGATATGCCGTTCTTCTTAGAATGGGGAAC  
CAAATAATCATGGAGGGAGTTACAGAGACAAAGATTGGAGCTGAGAATAAAAAGAATACAGAGACTGCCTCACTT  
AGGGATCCATCCATATACAACCACCAATCTACTGAAGATGCCAACAAGGGATTGGGTGCAGGAGAATGATATA  
GTTGTCTCCTGAGAGGATCTGCTAATGCCTGACAAATAAAAAAGTGGATGTTTACAGACATCCTTTGGACTTAGCA  
CAGGGTCCCAATTATGGAGCTGGAGAAAATACCTAAGGAGCTTAAGGAGTTTGCAGGCCCTAGAAGAAAAA  
CAACATGAACTAACAAGTACCCACAATTCATGGGATTAACCACCAATCAATGAAAACAATAATGGGATATAT



TAAATTTCAAGACAGGGTTTTTTCAGTGTAGCACTGTCTGTCCTGGAACCTACACCAGGCTGATTTTGAACCTCAAAAA  
TCCTTGTCTCTGCCTCCCAAGTGCTGTGATTGAAGGCATGAACCACCACTGCCTAACCAAAAAGTTGCCCTAACAG  
CTAGTTTTTCCATTTTTTCACTAGTCTAGTGTGATTTTCATGTACCCAAGAGCATTCCGCCCATTAACCTTGACAGTGT  
TTTTCTACTTGTGCATTAGATTTCCAAGGCTGGTTTTGGTGGAAAGAAATGAAAGGAAGTAGTTAGACACTTTAATA  
ATAATAATAATAATAATAATAATAATAATAATAATAATAATAATAATAATAATAATAATAATAATAATAATAATAATA  
GTATGAGTCTCTTTTTATGGGTTACCTTCATGAAAGAAGGGGTCATCAGATCACTTTGTATATGGTAGTAAGCCA  
CCATGTTGTTGCTGGGAATTGAACTCAGGAACTGTAAATAATAGCCGGTTCTCATAACTGCTGAGCAATCCCACC  
AGTTCTAGAAATATATTTTGATTTAATTTTTATTGCATTATGATAAGAAAATATACATAATTTCAATTTATCTGAATTT  
GTTAACATCTAAAAACATATTTTGAGTAAACAGACTTACATCACATTCTTCTTTTTATTTGTACCCCAACTCTTCCAG  
CTGATGCCCACTCAAAACCTATCAACCTTCCATTTTTTATCATGTTTCTTAATATTTATAAAAATATTGTAACAATAAAA  
ATGAATATTAAAAATGTTGTTTGATAGAAACAACAATCAATTTATATATTTGTCTGCAGCAATACTGAAAATCTTTTT  
TTCTCATAAATTTTAAATAACTGCAAATATATTAACTGTATGATATATTAATAATAATAATAATAATAATAATAATA  
TGAACATAAATAGTCTTTTGGTTTGGTTTGGTTTGGTTTGGTTTGGTTTGGTTTGGTTTGGTTTGGTTTGGTTTGGTTT  
TTGACTTACAGATTATGCTAACAGGACCCTGAAGTTGTCTTGTGTGAGGATAGTCCAGTGACTGGCAAATACAGAA  
GTGGATGCTCACAATCATCTATTGGATGGAACACAGGACTCCCAATGGAGGAGCTAGAGAAAAGTACCCAAGGAAC  
TGAGATGGTTTGAAACCCTAAATAAGAACAACAATATTAACTAACCAGTACCTCCAGAGCTCATGTCTCTAGTTGA  
ATGTGTAGCAGGAGATGGCCTGGTAGGCCATCTGTTGGGAGAGAGGCCATGGTTTTGTGAAGGTTATATGCCTC  
AGCTCAGGGTACTGCTAGGGAATGTAGGTGGGAGTAGGTATGTTGGGGATCAAGGAGAGGTAAGGGGGGAGGC  
GGGAGGGGACTTTTGAATGTAAACGAAGAAAGTATATAAATTGTAATAATTTAAAAAAAATCTTGGCTTACT  
GTGATACAAAAAAGAAAAGAAAAAAGAAGAACAATTTATGGACACTGGATTTTATTGTAATAAGGCTGT  
ACTTGAATGTCCCTCACATCACCAAGTATTTTACCTCCATAGTACTAAGGGTACTAAGGGTAGAGTTGATATATC  
TGCTGTGGCAAGGAATGAACTGTAGGCATGATTTTTGGATACTAATTTCTGCTATGTTCAAAGCTATTTGATTTGA  
GTGATTGTTGTCATTCTCAGGCCACATGTAACAGGGTACAATCACTTATGGAATGGGTGTTTATTAAGATGGTCTA  
TCCATGAAGTCATTGATCAACTGTTTCAATGAAGAATTGTTCTGCTTGGAGAGTGTCACAGAAGTTAGTTGATGAT  
AGAATTCAGTTTTATTGGATGTGATGTTTTTCAAAGCATTACCTTAGAATAATAGTAACTTATAAAGTCCTCTTC  
AGAATTTATACAATAATAATAAATATCAAGCAAAGCCTTTAGTCTCACTCTTTGCTGTTCTCTTATAAGCCACCTCCC  
AAATTAATTGTCTACATTTATTTTGGTTTATAAAGAGTTTTGAAAAATTAAGCTGTTCTGAAAACCATAGTATAGT  
GTAAAAATATCAATAAACAATCTACTAATACAGAGGCTGAGATAGGGGAACCATGTTTTCAAGACCATTATGTG  
GCACACAGCAATACAGTGTTATGTATAAACAAGAAGAAAGAATATATGGATTATACAATATTGGACTTATTAATCC  
TATTTACGAAATTAGGAACAACATAATGAAAAACGGACAATTTCTAATTCCTCATATTTTTGAATTTTATTCAATTAG  
GTTATGATGGTAATATTAATTTTCAATTAATAGATATTAAGGTAAAGTGATTGTTACTTTCTATTAGTTTTATTCTTA  
GAGGTGGAAGCATGTTTTTGTGGATTTGTTGTAAGATTACTTTCTTTTTCTTCTATGGTGTAGTTTCACTCCTTGTG  
TTGTTGATTCCACCTATTATTCTTTGTAGGGCTGGATTTAAGGAAAGATTATGTGTAATAATGGCTTTGTGCTTGT  
ATATATTGTTTTCTCCGTCTATGGTGATTGAGAGTTTTGTTAGGTATAGGAGCCTAGGCTGGCATTGTTCTCTA  
GAGGTGGAATAGATGCTGGGATTAATATCTTTTTTATGAAAATACATCCATGAGTTGAGAGAGGAGGACTTCCACT  
GGCCTTTGTACCCTAGTGCCATGTTCTAGGTGCTGCTAGTGAATGGGGAAATAAGTGACACCCCAAGTGACAACAG  
AAACCACCTCTTTCAGAATCCAACCTAAGAATGTCAGGCAGAGTTTATTTTGGCTGACTCATGGTAACCAGATCTTA  
TATAGAGAGGGTGGGACTCATGTATCGCTTCAAGAAATGCTTTAAGTTTAGTCTTATATTTTTACAGAGAAGGA  
AAAGAGAGAAATAACTTCATGAAGGATAACACCCAAGAAAGCAAATGATCAAGGCAGCTTTATAGCAACACACAA  
ATCTGCCCAACAGTAGTGTTTACTAGTGGTTTTGTTGGTGTAAAAAGCCATGGAGGCTACTGGACCATAGAGGGG  
CTGGAGAAAGTCAGATTGCTTTTTGTTATTGTTTTATTTAATTTAATTTTCCCTTTTGAATTCAGGCAGTCTCATT  
TAGATTTTTCTGCTGCTAAGACCACTAGTGTCTCTGGTACATTCAACCTTACTGATCTCCAGGCGACTAGACTTGT

CAGGATCAGAGTGGAAACTGGATATTTTACAACCAATTATCTGGTCCACTTGCCTACCTCTGGTTATCCCAGTTTCT  
CCACCTAAATTCGTTACTGATAATTTCTCAGTATGCAGCCTGCCATGATTCACAGACAGGTACAACAACTGCTTCT  
GACTCAGTATTAATTCAGTCCTTTCTTCTTCCAGGAATGTTAATATTTGACGATATACAAATTTATTTATCTGAG  
GTAGAATGGGCTATGCTAACCCATGGAAGAAGACACTCTACAGTGTGTAATGCTGGCCATCTACAAGCTAACCCAC  
CTGACTAATTTAACTGGTAACTATAACTCCTTTCTTTGTGTATACATTGTGTAACCTGGACTGTAACAGTGAAAA  
ATATACTCTGGGCGATATTGCCTTTTGGATTATAATTGATTTAGATTGCTTCTTCACTGTTGAATCAGGAACTGCTAC  
AGAAAAATAAAATATTTTCTATGTTATTTTTGTTTTGGGGTGTGTTGTTTTCTTTGTTTTTAAACATACAATTTCTCT  
GCATAACCCTGGCTGTCTCAAGATCAATCTGTACAGCAGGTTTACCACAACTCACCTGCCTTTGTGCCCAAGTT  
CTGGGTTTAAACACACACCACCACCATCCAGCCCAGCGTGAAAGTTCTTAATTTTAGTGAGGATCAATTATTTCTC  
TTAGAATGAATATTTCTTCCATGAAATCTAGCACTCTTAACTCTTAATCATACTATACTCCAATTTTCTAAATTT  
TTTTGTTCTTACCTGCCCTTGTGAATTATTTTACATACAGTATGAAGTTGAGATTGAGTGTGAGGCTGACTCTTTTA  
CCTATTATGTGCTACTGCTCTCGGGTGAACAAAACATACAGCACAAATTATATATATGCATAATTTTATAAAACTA  
TGGTGTATATATTATATAAATTTATTTATATGTAATATATTTTATCATTATAAATTTTTGTTATATAATACTGTA  
AATGTAGTTTAAATATACTTTAAAGTGAATTACAGGGTGTGATCCAACAATAGCTGTCTACCAACTGATATTCTAAG  
AACATAATAGTTATTAGTCAATGAGGTGGATTGTCTCAGGTAGTCTCCAGTGTATTATGGAATACTGAAAATGGC  
CTGTATTGACAGTGAAGAAATGGGCTTCCAATGAGGGCAAACAGGCAAAGAAAACAAAGTTTCTTCTTCCATGTC  
TTTCATATAGGTTGCAGAACATTTATATAAGTGTGTGCCAGGTTTAAAGTGACTTTTCCACTTGAAAAGATTCAGAT  
TCAAATGGATCTTGCCATCTCAAATTAAGAAAAAAATCCATTAATGTCTTGCCAGTCATTTGGATTTTAGTT  
AATTTTTGATGCAGTAAAGTTCAAACCCAAGAACAACACTCATCACATTGTCCAATTGGCTCCCCATCATTTATTGACATT  
TATAGCCTTCTTCAATTGAATTGCTTGTGTGTTTTGTTAAAAGTTACTTGGCAATTTGTATACATATGTCCAGACTGA  
GCTGATTGACTTTTTGTTGTTATTATTTAACTCTTAAACAATTATAGATAAGCCCTCATATCTATTATACAATTTTTT  
CTATTTTATTCAATTCTTGTATTCTTTGCATTGTGAAGAAAGAGATGGCTCAATTCTTAAACAGTACATGTTAAACTT  
CCCGTTCTGTTTATAGCACCAAATATAGTTTAAACAAAAAACTGTCTAATGTCAGGCAGTGTGGGAACAGGTCTTC  
AATCCCAGCATTTGGGGGGTGGGGGCATAGGCAGGCGAATTTCTGAGTTTGAGGCCACCTTGGTCTACAGAGTGA  
GTTTTTGGAAAGCCAGGGGTAAACAAAACAACTTTGTCTAGAAAACAAAACAAAACAAAACAAAACAAAACAAA  
GAACAAAAAATAAACAAGAATAAAACCTACTTGTGTCTCTAAGTCTTCTGGTCTCTTTGGATTCTGAATAC  
ATATCACACACACACACACACACATGCACCCTCACACACAGAAAAACACCGTTCAGATTTTAAATACATTAT  
CTGACTCACTAAGAAATAAACTACATCTGTGTTCTGTTGCCAGAAAACCTTAAATCATAATACAAATTTAGTTGA  
ACATGAATGATTTTATACAGGAGAGAATCCTGTTTAACTGTATTGAATGTGGGAGACCATTCTTCAAAAATGTCA  
CCTCATTAAGCACCAGCTGACCCACATTGCTGACCATCCCTATACATGTAACCTGTGTGAGAAAATGTTTAAACAGAT  
GATCAAGGCTTCTCAGACACCAGAATGTACTTAGTCAGAAAACCTCAGACAGAATGGCCAAGCTAAGGAAAATTAG  
CATATTGCAGGGACAGAATGTAAGAAGGTTTAAATCTAGAAAATTTGGGAGAGTTATGTTTCATATCATAAAAA  
AAGATACAATAGAATTCTACATTGTTTCCACTGTCTTTCAATTATCTGTGTTATCCACACATTTTTTTTTGATTAGTAA  
TAAAAGAAATGAGTATTTGTTTGACATTTGTATCCATACCTATGTTTTTGTAGACATCTGTGTCCATAGCAATGTTT  
TCTTAGACACTATCCTCTGGTTTCCAGGTACCATGGACTATGATTTAATTCTTACCTTTCTCAGAAGAGATGTAAAT  
GCTATTATGGCCCTTGAAGTCAGAAAAGAAATTAATTCATGGCATAAGTTTTCAGTGGCTATAATGTTGACCGTCATA  
GAATACAAAACAAAGATTCAGGTAATTTATGAACAAGATGATAAGACTGTGTCTTCTTTCAGTGTAAAGCATGGT  
AGTTGTCACTCAGTTTCTCCCTGACATTGTCTATTTTCAAGGAAGCTTGGGGAACACAAGAAGACCTGAAAGCC  
AGCACAAACCTAAGAAAGTTGTAAGCATTTGAAGTCCACTTACAGATCTCACTGTCCATACTAGTTATCCATCTCTG  
TGGAAAGTAAAAGAGAGCAGTAAAGTACTTTGATTATTTTGGCTTTTATTACACAAATTGGAATTTTTAAATGATTG  
CATACCACTCCTGTGCCTAAAGGGATGTACAATTTGTGATTTCTTAATTTTAAATGAGTATAGCAGTTTTCTCTATAG  
AAAAGTTTGGACATTAATTTATTGATAAGGTCAGTGCATGGGAGCTTCTGTACCCTCTCCAACATGGTATGCATCTG

ATACTCGAGGGTCTCATCCACTAGTAGTCTGGCAGAGAAACACATGTGGCTTATACATTTGGTCCCAATTAGAAGC  
AGGGTAGATTGAATCCCAGGTTTATGTTGAAATAACAACCTGCTTGGTCAGGAGGATACTTCTTAAGATGGCTGTGT  
AGTCAGAGAAGTGAATCCTGGCTTGTGAGTTCATGAAAGACAAATTATATTTTGTAGCTACTTTAAGCAACATAG  
TAGGTTACACACCAAGACACACAGACACAGACACAAACACCAATACGAATTCAGTGTAGGATCTCAGATAATAAA  
ATTCTCCTTAATAAATTGTTGAGATGAGTTTTCTTAACACCAGAAAATAATCTGTCCTGGAGCTGATTTTTTAAA  
TTAGTTAATCAATCAACATCCCAAACCTAGTATTCCTTCTTCTCTGCTCCCTGACTTCTCCTCCACTCCTGCTACCC  
CAATCCACTCTTCTCAATTTTTCTTCAGAAAAGAGATCTTCCATGATAACTTCTAGTTTTGGCTATTGTAGTTGCAC  
ATCCACTCATATTGATGATAGACAAGGCCTGGCAGAATTTTCATTCCATTGGCTATGGAATAGAGCTAAGTGGAA  
ACAGGCTATGTGAACAAATCTTAACAAAAATTTACTCTCATTAAACCATAAAGTCTTTTTTATTTCTTTTTATTAATT  
AGGTATTTTCTCGTTTACATTTCCAATGCTATCCAAAAGTTGCCCATACCATCCCCCACTCCCCTACCCACCCACT  
CCCCTTTTTGGCCCTGGCGTCCCCCTGTACTGGAGCATATAAAGTTTGCAAGTCCAAAGGGCCTCTCTTCTCTGTG  
ATGGCTCACTAGGCCATCTTTTGATACATATGCAGCTAGAGACAAGAGCTCTGGGGTACTGATTAGTTCATATTGT  
TGTTCCACCTATAGGGTTCAGTTCCTTTAGCACCTTGGGTACTTTCTCTAGCTCCTGCATTGGGGGCCGTTTGAC  
CCATTCCAATAGGTAACCTGTGAGCATCCACTTCTGTGTTTGTAGGCCTCGGCATAGTCTCACAGAGACAGCTAT  
ATCTGGATCCTTTAGCAAAATCTTGCTAGTGTATGCAATGGTGTGAGCGTTTGAAGCTAATTATGGGATGTATC  
CCTGGATATGGCAATCACTAGATGCTCCATCTTTTGTGTCAGCTCCAATTTTGTCTCTGTAACCTCTTCCATGGGT  
GTTTTGTTAACTATATTACAAGTACATCTTTACATTTTTCTTTAATATTTTACATTTTCTACATCTTCCAAGCCTGG  
TGGACAAAGTGCTTTTTAGTCAAATTGTATTAATTCATACCAATATTGTCCAGGGAAGTTTCTTGGAAGCCCTTT  
AGAGCATCAGTTTCTTGCTTTAGCTGTTTCTTTCATCATGAGGAATAAAGTATAAACACAGTACATAGCCACAGTTT  
CTGTCATCGATGAGGACTTGGTCTGTGAAAGATACTATGCAGATTCTTAGCCTCTGAACTTGGCAATGGTTTACAG  
ATGCTGATGTGAGCAAATGAGGAACTAAAGGACAACCTTGTAGGTCTCAGGTCTTCTGTGCACACTGTTAACA  
GATAATAATATGGGGAATGAGATCTAGTTTTTGTAGTGCAGAGTCATTTGCCCTGGTCAATATTAAGTTTAAAC  
TTTTCTGAATATCATTTACTGAAATTGAATAAATTTAAATTTAAATTATGTAATTATAACAAAAAGAAAAACAACA  
GCAATTAATAATAATAATAATAATAAAAAATAACAATAACAGTGAGACTGATGAGCCTTCACTGACAGGAC  
TTGAGTGTCTATGATAGAATTTGAGTCAGGCATTGTGTAACACATTAATTATGAGGATCTTGCTAATTTTTGTG  
TCCATAGAACTGGATTATCACATGGATATTTTCCCCCTTATATTCTGAGCATGTGAAGAAAAGTGATGTTTCTTT  
TCTTATACAATTAACAGATTCCATAAAAGCTTATCTTCTCCCACTTCTAAATAAGCATTTTCTGTTAATTTATTGCCA  
TGTTGTATGCTTTAACTGTTTGGTAGTTGTCTGTTAATTTTTGGTTTATCTTACATATAAAGCAAGTTTGATAAAAAAT  
TTGGTACGGAATTTTATGCATTTTATAATTGTAATAAATATTATTTTCACTCAACTCAAAGTGCTCTGTGGTTATAAAT  
TGGCCTCTCAGTTAGTAATACACAACACAAATTCATTCCACTTAACCCTTCTGAAAATGAACTTGCATGGTATTGT  
CTGATTTGAAGCTAATAAATCTATTTAACTAAACCAGAGACATTTGTGTTAGGAAGGAACTACTACTGTCTGTTGT  
TTAAAAAATGAAAAGTTACTTCTACAGTAAAAGAAAGAAAGGAGGGCCTGCCTTCAAGCAATTGTGGGAAGTCTG  
TGTTGCATGTGCATTTTTTCAAGTTCAGCAGCATCTAGGGCACTCAGAATACACAGAGATTTCTTCATATGTGGTGAG  
AAAAACCAATCTACAGGAATCCCAGGCAAGTGCTTCAAGCGAAGTCTTAGTCGTGCGAAAGTAGATGTAAAACC  
TCCCTTCTGCATGGGAGGTTTGTAGGAAACAAACAAGCTCAAATCCTATAAATGTAGTCTCTCTGAAACTTCCAGT  
AGGAGGTCTGCTGTTTTTATATGATTTTATACATTTAATGTACTTACATTATGGGTACATGTGTTTGATTAAGTAC  
ATATGTGTGTAACCTGTGCACAAACCACTGCACATGTGTAGAGATTGCAGGACAGTGTGGAAGAGACAATCCTCTT  
CTTCTACCATGTATATTATTTAGAGATGAAGTTCAGGTACGCGGTCTTGTAGTGGCTAGTAAACTTACTTGAGTGG  
CTAGTGGGCCACCTCATACTTCTTCTTCAAGTCTTACATCCTCTGAAGATTGCCTGTTTATTTCATCATGTCAA  
AACCCACAGAGACTATGAAGGTGGTCATGCTGCAAACCAAGCATGAGTATAGAAAATGAAGCAACCAAGTTTAAA  
TGAGCCATTGATATTTCTTATCATTCTATCACTCCCATAGGTGCAAGTGGTTAAACTCTCACCCAAGGCCTTCTACT  
ATCAGTTGCATTGAACTAAAAGTGCTGTAGCAGTATCTGTATGCACAGCGCCTGCAAGGTCTGAGATAGAAAAGA

GCCCAAGCAATGAGAGGGAAGGGCGTGCATGCCACTATCTTTATCTCAGAAGTTATTTCTAGTTTGTAGCTTGGAA  
AGGAAAACATTCAAATTTCCACTAGGGTATCACTGGGTATGCAAACCATGCTTAAATCTAAGTCTCTAGTTCAGCAT  
TGCCTGGCAAATGAAAATCAAAGTGGATAATAATCTTGGAGGTCTTTATATAATAAGGTATTGGCAGGGTCTTT  
AAAGAATACCTTAAGGGTCTTTGTTTATATATTATGGTTTGCAGTTTTTTTTGTTTTTATGGGATTTCTGAGTGTTT  
GTGAACATATATGTCTCTGTGTCTACATGTATATTTCTGTGCTTTTTCTTGCCTCTTTTTATTATGTTTGTCTTGT  
CTGTTCTGGTTCATTTGTTTATTTTGTATCTTAATCTTCATTATTATTGTCATTAGTATCATTAAATAGTATCATTATTAT  
TTAGATGCCTGTTTGTATTTAATAAAGGGAGAAAGAAAAAGTGTGAATTTGGGTGGGTGCGAGAAGTGGAGAGG  
TTGTAGAAGGATTTGGGGGGACAGTAATCTGAATCTATTGAATGAAAACTGTATTTTCAATGAAAAGTGTCTTCC  
CAGAAATTTTGTCTTACTATTAGTACAAAGGAATCAAAAACTTATTTTTAAAGAATCATATTGTATACAGAGGAA  
AAAAATGAGAGCTTTTCCAAGTGGAAAATGTTTCATTTTGAAGTATGGTAAGGACCCTAGAGGTAATAATCAAGA  
ACACAGAGCACAAACACAAAGCAGAAAAAAGTACAAAGCACACACAAATATACAGGCAGGAATCAAATTAGTCAAT  
TTATTGACCTTTTAAATGGAGCACAAATCCTCATCCATTCTCCATTCCGACAAAACAGATTTGCTGTTGTCTCCAATG  
ACTTTGAGTAGGAATTCATCCAGTAACCTTTCTCATCTATTTTATTAGAGCTGACTCATCCCTGCCAAGATCCAGG  
ACAGGAAAAATAGACTCCATCATCCACTTGGGTATGTGTGTTTCCAAGTTCCTTCATATATATTCTTCTTATGCTTG  
GTGAACCCCTACATTAATTTTCTACTCATAACTATAATTTCTACTGTTATAAATCCTAACATACATACCT  
GACATAAAGATAGTCTTAGACAACCTCCAGATGATCACATGATTAGACAACCTAAAATAGATCACATCTATCCTAGTA  
CAGTTCTGGAAGGCAGAAAGTGTAAAAATCAAGGAGCTGGCTAGTCTTACTAGTATTTCTGGCACTGTGAATGG  
CAACCTATAAGTTCTAAGTCCTGTGACACTTTCATGGGAGTTGTCTAGGACTATCTTTATGTCAGGTATTTATGTTA  
GGATTTATAACAGTAGGAAATTACAGTTATGAAGTAGGAAAAAATAAATCTATGTAAGGGCTCACCAAGCATGA  
GGAAGAATATATATGAAGGAACTGTAGCATTAGAAAGGTTGAGAACCACTCTCTGGATGCTTGAAAACAGAAAGC  
ATAATGGAGTCATAGGCTGGTCTTGGCATCAGTCTGATATCTGCTTACAGACTAATATCTTGCTTCTTTTGTCTTG  
TGACCATGAGGGGAATAACCTAGATAGTATAGTCAAAGGACCAATCTGAGGACATGTTCAGAATCCATTTTGTGA  
AAACATGTGCTGTTGTATCATTGGACAGGGCTGTCTTTGGAACCAAGTGCATGCACATGAGTGCTTTGGTGCTTTG  
CTCTTTCTTTCTTTCTTTCTTTCTTTCTTTCTTTCTTTCTTTCTTTCTTTCTTTCTTTCTTTCTTTCTTTCTTTCTT  
TCTTACTATCTTTCTTTCTTATTTTTTTGAGGCAGGTTTCTCTGTGTAGGCTTGGCTGTTGTAGAACTCATTCTGAA  
AACCTGGTTGGCCTTGAACCTCATAAATTTGCCTGCCTCTGCCTACCAAGTCCAGGGAATAAAGGCTTGAACACCA  
CACCCAGCTTCTTTGATTTTTTTTTTATTCTGCTATTAACCTATTGTTCCCAAGGTTTTTTATTTTATTATTTTAT  
TAGATATTTTCTATATTTACATTTTAAATGTTATCCCATTTCAAGTTTTCCCTCTAAAAACCAATAACATGTCCCTC  
CTCCCCCTACTGACCAACCTAAGCACTCCTGCTTCCCTGTCATGCCATTCCCTTACACTGAGGTATAGAGTCTCTCAG  
GACCAGGATCCCCTCCTCTCACTGTGTCCAACCTAGGCCATCATTGCTACATATTCGGTGGCAGCGATGGGCCCTC  
ACTTTGCATTATTTGGTTGGTCTTTTTTTTTAATTACATATATTTAACTTACATTTCAAATGTTGTATTCTTTCCAGT  
TTCCCACTCCTCCAGAAACCCCTATCACATCCCCTGTCCCCTGCTTCAATGAGGGTGTTCCTTCACTGTGCACCC  
TCTCCACCTCACAGTGTGGTGGCTAACAAAGTTTATATCTCTGTATCCTTATCATTCAACACCATATTGGAGATCCTG  
CAGCTTATAGGGAAAAGATGTCCAGATTCTGAGAACTGCAGGGTACCATCCAATACATCAATCTCAAGCCACATGT  
GGGTACATATTTCTAAAAACATGTGCTGCTGTTAATAGCTTTTCAAGTTGGATCTTTAAGTACCTCAGCAAAGATTGA  
GGTGACTGCTCCCTGCATAACTACTGCCACTTCAATTTGGGGAGCATCTGTGCCAGGAAGTCAAGGGTAGATATCC  
ACATAGTTGATGCGGATTTCAAGTGGCCTGCAGGCACAGATGGAAGTCATGCATGTCCAAGCCTTACACATTTGAGC  
TTAGGAGATAGTATGTGAGCAGTTTCAATGTTGCTATTTGGATTCTGCATAGGACATATTGCTTTTCAATATTTT  
GGATTTATTTACATTTTAAATGATAGCTCTTTCCATTTTCCATTCAACAAATCCCCAACCCATCCACCATCTCCTCC  
CTTCCCTTTGAAAAAAGGCTTAGTTTGTATTATTTCTATATTGCACTCCAGCACTGAGTGAAATCAAGACAGGAC  
ACATGTAGGAGTATAGGCAGGGTACATGGAGAAAGGCTGCTTATTGGATTGCTTTCTCAGCACAGTTTTCTCAGCT  
TTTTTTCTTACAAAATTTAAAAGCTTTTTTTTAACTTTTATTTAATAACATAACCCACAAACACACACACGCACACACA

CCCACACACACACACACACACACACAAGACATAAGATCACTAAAGAACAAGCGAAATGATTGTAAAGCAAT  
GTCCTAAATGTATTTTATTATCTCCAGTGCCACATTTATAAGTCAATTCTAGAGGCCTTATGTCTAATCATATTTGGC  
AAATGGATATAACCCATTATGCAGAAATTTGGAAAATAAATATGAACATGTTTGTATCGATACTTGTTCCAGGATTT  
CTTTTTGCTTTTTTCTGCTTCTCTGCATAAAGGAAAGGTTTCTAAAAACGTAATTGATCATTGCCACAAGCATTAA  
TGCAATAGGATTGCCTAAACATATCAAAACAGATAATGGGCCATCCTATTCTAGTAAAAATTTTATTTCATTCTTTA  
AGGAATTTGGAATCAAACATAAAACTTGAATTCCTTATAAGCCCATGGAAACGGAATAGTTCAATGTGCTCATCAG  
ACCTTAAAAAATTGGCCTTTTATGACAAAACAGTGGCAGTTATATCCCCAAGGTCACCAAAGGCGCATCTTGCCCT  
TACTTTATTTGATCTAAATTTTTTGCAAAGTATTAAGGTCAGTCTGCAGCAGATCACCCTGGCATCCAGTTA  
CTTCTAATTCTTATGCATTGATAAAATGAAAGGACACACTAACTAAGGAATGTAAGGGTCCAGATCCGGTTCGAAT  
CTGGGGAAGGGCTCGTTTTGCATTTTTTATAAAGACATGGAGCAGAGGGCTGCCAAGAGATTAATTTGTTAG  
CTGAACACAGATCCTGAATCTTCTTATAATTATCACTCTGAGAATAAAATTCCTCTTTTGCATAGAATTTAGTTGGG  
GACTCAGCCTCCAGAAAAGCTGTTTTCTGCTACTCTCAGAGCTTTGCAATTTGCAACTGAATAAAGTATCTGGAC  
TTCCCCAAAAGAAGCTTTGCATTGCTACTTTCTCATTGTCTGGGTCTTTTTTCTAAGCAGGTCAATCAACATCCTC  
CAATCAGACTGCAGGGGGAGTGCATCCCTGCAAACAAAGGCTTAAGGTGGCAACTGCTATTTTATTCTAAAGAC  
ATTCTACCATGCATTTTGGCTTTATGTCTGATTTGAAAAATAGGTTTATTAGAAGGGCTAGGAAGGCAGATATTTCA  
AATATTAGAAGAGATTGGTTTTTATTCTGATAGATGGTCTTAGTCCCTTTGCTGGTCTCTGGTCTCCATCCTTGCTG  
TTATTGCAAGCTCCCCTAATTCCTCAGGCTGTGGGAATAACAGAGATGAGGAGGATGACCTCCAGCTCCTAATAT  
AGCCTAAAAGCCACAAATTGTGATGTTACCAGTGGTATAATTCTTGTGAGGCCTTGCTAAATCTGCTGTTGGCAAT  
ACTCCTTAGGAGATGCACAGTACTGAGAAGTGTGCATACTGATTCCTGATGATATGAATACAGTATGGGTACAGC  
TTCGGTGCAGATTTTACTGTATAATATCATGGGTATTCAGTGTCTTTGTCTAATATCCACGTAGCAGTGAGTGCA  
TACCATGTGTGTTCTTGTCTTAGGGAGAGATGTTCCACATGTATCTGTTAAATCCATTTGGTCCATGACTTCTATAA  
GTTTCACAGTGTCTCTGAGTTGAATGGTAGGGATATAAAGTAGGGAAAGAATTTGTTCAACCCATATTACATGAAA  
AAAATTAATTAATATATACTTTTTTAAATCCAAAAGCATGCCTATAGACCCATCTAATGTAGGGAGATCCTATTT  
GATGTTTCTCTCTCGTAGGTGACTCTAGATTTTACAAGTTGGCATAAGATTACTAGCACACTCAGATTAACATAAA  
CACATTTTCAAGTGTCTAAAACCATCACACCAATCAACCGAGATATTCTCTGTACATTCCATGGGCTAAATGTCA  
GAAACATGTGTGTTTTACAGTGTGTCTCAGCTTTAAAGTGTAAATCCTGAAAGGAGGGCCATGGTCAACCTCCTA  
CTTCTGCTTCTAGGCCACTATTTGCTGCACTGTGGCACTACAAAGGCTTCTTTGTTAATCAGGTACCACTGTGCCAT  
AGATATCTTGAAGTGACAGAGTGTACAAGCATCCATGGGACCTAGATGCTGATGAGAACAACCTTACACCATCTCC  
TGCCTTACAACATACTTATTAAGATGGTGAATATTGGGAAAGTCATGGTAGAACAATTTCTTTAAAGCCAGGG  
CTGTTCTCAACAGTCATCTCCTGATTTTCTATATGGACCTCATATGTTACACTTTGAAGTCAACCCACAATCTCATGT  
TTCTGTGCAAGTCATTAGAGTGTCAATTAATCTAGACTTTGGGAATATATCAATAAGTCTGCATTATCTTCATATT  
CCCTGCCCTTAATTATGGTAACCTTGCCAAGAATAGATGTCTCACCATTCTCACTGACAGTTTACCTGGTAAATAGA  
TAGTTGAGAAAAAGACATTCTTCTAAGGCCAAATAGCCTAGTTAATCAGTATATGAGAAGCAGGGCTGACATCAC  
TCAGCACAAAAGCTAAAGAGAGTCTCTTGTGTTTGTGGAGAAGTGTGAGAGAACAGCAGGGACAGGGGCCTTAATGAT  
AGTCAGTCCAGACCTGGAGGCTGGGTCTAACAGCATCCAAGGAATACAGGCCAATTTCTCCAGCTTCTGGAG  
GAGCACTGTTTCTTCAAATGTGACAGGGATGGCACCCACAAGGGGGAAGAATGCAGTGTGTTCTAGACTTAT  
TTTGAGCCATCAGGGTAATGATCCTCCACATTTCCCTTGCTATTACAAATGATCAACCTCAATAGGGGTCTGTAA  
GCTCTGCTGACACCAGAATCTCTAATTGCAAAACCTTACAGGAAAGACCAGTTTTCTCCACTCTAAGGATAAAAA  
GCAAGGATTGGGCTCATATGGCTAAGCATTTTCTGACTAGCTTTGAGAGAACAGCGTGGTCCAAGGCCAGATTTT  
AGATTTGGTGATTAAGTACTGACAGTTTAAAAATAAGTACCTGTAACGTTTGTCTGTGGTACTGAAAAATATTGTCCCA  
AATGTATGAACACAAAACGGTGAGCATGTAGCCTAAGGAGCAACATTTCCCTGATTTAACACCAGGCATTTGGCAT  
TCATTCTATACAGAATTACCCCCGAGTCTCCAGACCACCCTCCTCAACTGTACATTACAAGCATTACAAGTTTTT

GTTATAGCCCATAAGATACAAGTCTTCAAGAAAACACAATCAGACACAAGGCAGAAACAAGAACTCATGTATTGA  
TCAAATTGCATTATCAATAAAAAAATGTCAGCAATGGGTTGACATTGCTTAGTGTCTGCATAAAATTGGTATAAT  
GGACCTAAAAGTTCTGTAACAGTTCATGAGTACAAGAAAAACAAGATTATAATTTCTTAGTAATAAAGAGAGAAAC  
ACTTTCTGTAAAGTATTCAAAACCCTGTCTAAGGTAGATTTGTCACCTCAATGGTAGTATTTGATTTGTAACCTCAA  
AGCTGACCCGTCACGAGGTCCAGTTATTCGAGGGTCTCGAGAGGACTTTCTCCTAAGAAATAAATGGGGTGTAG  
AGAGAGATGAGGATATTGTGCGAACAAAGATATGGAATGTTCTGAATTACATCAGGACCCCAATGTATTAGCCA  
TGACCAAGGTTTAAATGCACAAGCAAAGGGGAAGTGCCTTTCAGCAGGAGAAATGGGGCAGAAGCAATGCACC  
TCAGCAGGAGGGATGGGGCAGCAGGGTGGGGGGGAGAGGAAGTACTTCTCAGCAGAAAGGAAGGGGCAGCG  
GAAATTTTTCTTTGGCGACTATTGGTGAAGCAGGAAGTGGTGTATCAGGGTACATCTTTAGGTCAGGACATC  
CAGCACTGACTTAGGGTTGGAACAATCTGTAGTTGTTCTCGGAGCAGTGAGTCTGTGGCCTGCTTTAACCTCTTT  
TCTTATCGGGGGGGGGGGGAGAGACCCAATTAGAGATCAGGACAATAGCGTTGCAGTAATAGCTCCCAACAA  
AAAGCATAGATGCACTCCCCACCACCAGAAAATTAATAAACAACAACAATACAAAACAAAACAAAACAAAACAA  
CAAACAAAACAAACAAAGCAAAAAAGCAAAAGATACTCCAATGCACTGTATCTGCTTTGTTGTGAGTAAATCCACAA  
ACTTGAATGGATAGCAACACAGGAAGGAATTATGCACAGCAAGGCACACACACACACACACACACACACACACAC  
ACACACACACACACACACACAAAAGTAAAAAGAAACAGTCCAGTCAAGAAGCTATTGAAGAGAGTCCTTTAAA  
ATTTATGATAAAGAAGATGAAGTGTATTTCTTACAATTGATGATTTCTGGTGGAGGGCAAGGAAGATTCATTTT  
ATAGCTTGTGTTGATATTTCTAGGTTCTTTTTATACTCCAAAACACTAGATAGGACAGAAATAAAGGTAGAG  
AGAGGAATTAGAAAATCTCTGAATCTAATTTTTTTCGTAGTGCTTCTTCTTAACTATGGATATGAAAAACCACAA  
CCAATTGCGTAACCAACCACCAAAACACCAGACAAAATGTACTAGCTTTGACACTCAATCTGTGCAAAGTTAATGC  
AGCAGGAGTTTTTCACTAATGTATGTTGTATGTAATATAGTATCCACCAAATAGTAACTCTGTATTCCATACTT  
CCTGCATTGAGTCTCACTATTTAATATTAGTCATACCTATTCCATGCTGTGCCATGTGTTTTGATGCAATTAAGT  
TTCATCTGGGGACCTCATATGAAATGCAAATATTGTGTGTAATCTCCCTTAGTGTACTTCATAAACATGTTTCATC  
TATGGAGTAACAGTATTAATGCTTTCTGTTTGAAGTACACTTTCAAGTGTGCATAAGTAGATACTCCTCTTTAGTATTT  
TATGATACTAAATATAACATATAGTGTATACTTAGAAGATGAATACAGTAAAGGATTTTTAAAATGTTGTGTGA  
GGGCTTTGTGATTTAAAAAAGTGTCTCAATAGTATTGGCTGAGATTCTGCAGTCTTGTGTGTGCTCTTTTCT  
AATGAATCATAATTAACGTTTATGCTGAGACTCGGGGAGGCAGGCTTATCAGTAGAAAGAAAGCCATTATCTTGG  
AATCTCTCCTTCTATAAGTACTCCTATAAGTATATAAATGTCTGGGTGGCCAATTAGACAGAATGATGTTACCCAGA  
GAGATGTAACCCAAATTCATAGGGCAACAATGTCTAGGTAAGTGTCTGGCATTGAACAGTCACTCCACTGTTCTGA  
ACAACTGATTGTAACAAGTAGTTAAGCACAGGCAGATAGCATAAGTGAAGTATGCAAGCCTGTCTTGATTTCA  
ATGTGATAAAGATCGGGGCCAAAACACTACAAAAGGAGGTAATGGGTCTTTCTGTTTACAAGTCTCAGCCTGTAAA  
TTGCATGATCTAGGAAAGTCAGGACAGAAGTATTGATTGAGAGCTGGTAAGTAGAGGCAGAACTGAAGCAGAGAT  
TATGGAAGAACTCTGGATTACTTTCTCCAAGTCATAGGTATGCGAGGTCCTAGGGGATGCAAAACAGAAAAGAA  
AGAAAAAATAAGTACCAAACATATCACAATGGTTGACCTACATGCATACTTTAAAGTCTGCTCTTGATAATATTTGT  
ATTCATTTGGAATCAAGTCTACATGGCAATTGGTAAACAGCATACTTTTCATTATTTCTATTGGATGGACATTTTT  
ACCTGAAGGAGTGTATTTGTTGGATGTGAACATTCTGGACTACATGGAGGTCCTAAGTTAGCTTGTATCAGATCC  
CCTAAAACAGGACTTACATGTGGCTGTGACACACAGGATGATCACTGGGAATTGAATCCCAGACCCTCTGCAAGA  
GCAGCCAATGATCTTATACTCTGAGTCATGTAAAGATCTCCACATTTCTGGAGAGAGAAGGAAGGTGTAGGAAGA  
GAACATTACTCAAATGTCCAAATTCATCTAAGAATAAATTAATGCTTGAAGGGTCTGTCAAGATACACAACAAA  
AACAAGAAAAAATTAGAAGGTGTGTAATAAATTTAAAGAATGTTTGTCTGCTCTGTTGTGTGTTCTGACCAGGA  
CTAATGAACACACTAAATGAAGCTGCACTGAGAAGCATAAAGAAGGGAGGTACCACACTCTGACAAGTGCTAAG  
GTTGTTTCACTGTATTTGTGTAATCCTTCAGGGGCTTCTGTCAAATATAAACCCCTTTATCAAATCCCCAACAGT  
AAATTCTGTGTGCTCATTGGAGACTGGGCAGAAGATATGTGAGATGCACCAGGAATGATTAACCTTTATGTTCT





AAGTCCAGGTACCCATTAGTTGCAAATTAGCAATGATCAAGCTTAGTCTTAGAGATTCTGGTGTGGGGAGGTA  
GCTTTGAAAATTGCAGAAAGGCTGCAGCCTCTCTGGGAGTGGAGGCTGTGCTCCAAATTAATTTGCTAGCTAATT  
AAGATTTTAGCTATCTTCCCTAATTCTTCTAATACTGGAATTATTAATAGACCAGTCCAATATTGAATTAGGATACCT  
GGTCACAGTGAAGTTAGAAGATGAATCACTATAACTCTATCTTGAGACTAATCTTTCTAAATCAGATTACACAGTCT  
CTACTGTTCTATATCCCATAATTCTTAAAAACCTTGAAGTAAAGCATCTTAGCTTGCCAACTGGGAAAATGATAA  
ACAAAGGTAGGTCAAAAACATATACCCAATTCAGCTTTCTTGCTACTACAGTCAGGGCACTAAGCAAACACACCTG  
TTAGTGTGTCACAAAATTAGCCTTCATATATCTGCAGCATTCTGTGAAGAGAACCTATTCTTGCCCTTTCCCAATA  
AAGTAGCTACTTAGGATCAAGCCATATACCAATAAGTAGATTTTTTTCATTTGACCTAGACATGATTATGTCTCCTAT  
TTAAGATATTATCAGGCATTTTTAAGTTCTTTGACATCCAAATTTCAAAGTTCTTAAAGTGTGATTTAAATAATGTGC  
ATGGGGATATAATTTATTTGTCTTTGTTTTTTAAAAAGAAGAGTTTTTAAAGTTCCACATTACCCTGTATAAAAA  
ATAATAAATTGTTTACAAAACATTTCAAATGCTTTACTGTTATAGTCAGTATTAATAACAAGGCCAGCGACTAAT  
TACACTTTCAATTGTTTATCTTGAAGAGCGGATTTAACTAGAAAAGCTTTAAAATGTATTAATAGTCCCCCTCTCCTT  
TCTCTTCTCACTTCTCCATTTCCAGCAGCAGTCTTCTGCCTCTGCAGGTATTTACACATGAAGTGTCCAAGCAA  
AATGGCATGTACACAAAACAACCATACCCAGCATCAAAGTTTATAAAATAAAAGAAATGATGTGTAGACTATGATAA  
TAATTTTTCTGGGAAAGGTAGTATAGGAGAGAGGAATCACTGTGTGTGGACTCACAAGACACAAAAGAACCCCCC  
AAATAGATCCAATTTACCACTCCTTAGAAAACACAAAACACCACAGTCAGGAGGAGGGATTTTGAATGAGGAACACTT  
TCCTTGCTTTCCAAGTGCTTTGGTGGATGAGCAACTATAGGAAAAGGGTCTCACAGCAGGTAACCTCCCACCA  
CCACCCACACAAAAGGCAAAGTCACCTGGTCGAACCCAGGAGCAAATCACCTGCCTCTGCAGGTTGTTTCTGTTTA  
GCTGCATTTGGAGAAAGCAGTTGGAGCAGTTGCTGCCTGCTCTTGAGAAGGGCTCTAAGGGTACAATGTATAGGT  
CTGTAGAATTGCAACAAGTTTGGACCCTAGAAAAGTAATGGGTTGCTGAAATGGTCTGGACTGTGAATCTTAGG  
GTCTTGCTAGGGAATTTCTTAATCTACAGTGACATTTAGACATTGGAGCAAGCAGAGTTGCTTTGATCCTTATCTTA  
GGCACTCAAAGTTGCTCTGGAAGACAATCGTTGTGACTGTTTGTGAGGCTTTGCTGGAGGAGAGGGGATATTGAC  
AGCCCTCTACACGATCTGCATGGCACACAACCTAGAGCTTTCTTTCTTATGAAGCATAGAAGTGAAGTACTGAGGGCAAAA  
CACCACAGGAGACAACCTATATCAGCGTCCCTAAGTAAAATCTTGCTGGTGTATGAAATAGTGTGCCTTGCAAATA  
CTGAAGTGAGTGCTCACAGTCATCGATAGGATGGAATACAGGGCCCCCAATATAGGAGCTAAAGAAAGTACCCAA  
AAACTGAAGGGGTCTGCAACCCTATAGGCTGAACAACAATATGAACTAACCAGTACCCACAGAACCTTGTTCTCTA  
GCTGCATATGTAGCAGAAGATTGCCTAGTCGGCTATCATTGGGAAGAGAGGCCCTTGGTCTAGCAAAATTTATATT  
CCACAGTTCAGGGGAATGCCAAGGCCAAGAAGTGGGAGTGAGTGGGTAGGTGAGCAGGGGGCAGGAGGTATA  
GGGGACTTTTGGGATAGCATTGAAAGGTAAAAGAAGAACATATGTAATAAAAAATGTGTGGGAAAATAAAGAG  
ACGAGGTCGTTTCTACAATTAGGAAAAGTCTCATTACTTTATCCATTAATGTGCACATTAACAAAAAAGTGGCTA  
ATGGCTTTGAACAGGATCCTTGCTGAGGACAGGATCTTATAAAGGGTTCCAGATAGACAACCTCATTACAGTTTAA  
CAAGCTAGTACTTATAACAATTGATCATTGGGAGCCTCAAGCTGAGACACCCGATCACTGGGCATAAGTGTGAG  
ATAATTTGAAGATATTTCCATTGTTTTGAATAATCTGTATGATATTGGATACATTTACTCTATGGAAGGAGTATGTG  
TGTGGAGTCCCTTGTGCTACTGAAGTAGGAGTTGTAAAACACCTGTGGCGATGATGCAAGTTCATATCTATGATGT  
GTTTGTGATGTCAGTATTTATAAAGGAGGAGGCATCTCTGAGATGCAATAACACATTTAAAAAAGAAAACCAAA  
GACAAAACGGAAAGGGAATATTGCCTTATGTTGTTGATTTCTGTTTTGTGTGTGTTGTGTGTGTTTTGTTTTT  
GTTTTGTTGTTGTTGTTGTTGTTTTCTATTTGTGTGTATGGTCTGATTTTTGGATTTTTCGAGACAGGAATTCTC  
TATATGCCCTGGCTGTCTGGAACCTCACTCTGTAGACCATGCTGGCCTTGTACTCAGAAATCTGCCTACGTCTGCC  
TCCAAGTGCTGGGATTAAGCTGTGCACCACCAACACCCTGCAAATATTGCCATTTTATGAGATATTTTAAATG  
TTTTTTTTACTGATTTATGTAAGATATTTCAAATGGTGTGTCCATTTTTTTTACGTTGTTGCATTATTCCTTTCAAAG  
TTTGTGATTATTGCTAACGAATACAGGATTTAACATCAGGACACTGACATTCTTCTTTTTCATTTCACTCTCCTT  
TTTTCTGTTTAACTTATCTGGAAATGGATTTTTCTGTATAGTCTAGCAATTCTGGGCCTTCTGTGCAGTTCAGTC

CTGAATCAAATCTACTGGATTTTATCACCAAATCTGAGATTAACCCCTTTCTAAGCAGACATCAACATTTTTTTA  
AATTTTCTGTCTACAATACTTCTTTAGAAGATGTCCTCATCACAGTTCCCAAGTAATGCCTTCAGACACTTCTAACT  
TTCTGTAGCAACCTTACCATATAGAGCCTATGTAAGGCATCCTGTTGGGTAGCATTCTGCCTTAAGCTGTCCACATC  
CAAAGTGTGGTATTCTTACAGTGGCCTGTGAGGTTAGTGTGATAAATCTGGGATGAGCTGTCAGGTGAGGAATT  
ATTCACCACTGCAGCCACAAAGCTTGCAGTTTCCACTGCTCCTGATCATGATGCTGCAGAAGGTTTCTTTGATTATC  
ATAGACACTGGCTTCTTATTCCCAAATCTTGGTAGTGGTACTGTATTCTGCCTGTCTGTGTAACAATTAGACATGA  
ACCATGTCTTAGTATACTGGTTGAATATTGAGAAGTTTGTGTTCTTTTCTGCTGGATAGCCTGTTACTGGGGAAAT  
CAGGCCATCAAGATTATTCTTAGCCTGGAAGGTACAGAGTCAGGGTCAGAGGAAGTGTGAAGTCTGGGTAAGGA  
CTAGTTCTTAATCCAGATATTCCCTATGTATAAGAACCCTAATTGTCAACATTTCTATTAACAAAAAACACTTGA  
GGTTTATATGTGTTATTCTCAAATGACAGCTGTAAGTTTTTCCACTTAAACACACCCCTCAATATAAATAACAGAT  
ATCTACAGGGCCCTTTATAAACTATTAGAGTTGTGCATCCCCATGGTCTCTGGTCTGTTTCCATTGTGAAAGGACA  
TATGTTGAGAGAGATTGTTTACCTTTGTTCTAATGATGTCCCTGGTCTTAAATGTCTCAGTATTCATCCTGGTGTGAA  
TACTGTGGAAATCGAAAATGTTAAAGGAACCGTGAAGAAAAATGTTAATTGGTGTGAAAGAGTTAATGGGAACA  
GCCGTTAGTTTCCACTGACTGAAACTAAAATATTACCTGTTATATTTCAAAAAACATAATTATTGCTCATTTG  
TTCAAAGTGGACAGCCAGGTACAAATGAAATGATTTTATCCACTGGGCTGTTTTTTTTTCAAAGCCTGGGCATGCT  
TCAACAAAGGAGTGCCTGAGAGCACCTGAATGTTTCAAGATAAAGTTTACTGAGGTCTCCTTGGCCTGAGAGTGCCT  
GTCCAGCCGCACTTTTGAACAAGAGGAATGGGTGGGACATACTTTGATAGAAACAGCAGGAGCTTGGTTGCCAGT  
CAGAAAATTGTTGAAGAACAGCAGCAGGCTGTAGTGTGACATTGTCAGACACCCTGTGAAAATTGCAAAACCC  
AAAGTAACTTGGAGCTAAAAAGTTAGAGATCTGATTAAGAGGTAAGATCTTGGATGTTGTAGTGAAGAGCAAAAA  
CTTATAATTTGCGCCTCATAGCATTGTGGTATGTAAGTTCAAGAAATTCAGGGCTGAAGAATAGACCAAGGCGG  
GTCCAGGCACAGCCAAACCCACCCTGTAGCTAAGAATGTCCAGCCATAAAAGATAAAAAAGAGAATGCAGGAACT  
AGCCACTGCTATCAGGGCGGACCAAATGGCCATCTGGCAGGATGGCACCTCCCTATAGATCCCCATAAATCATACA  
TTGACCAGGTGTCCTGCTGACCTCGAGAAGTCCCAAGCCCTTGTGCCTCCCTACACCTTAGCATGCACATATTACC  
TGTTAATTTGTAATCATCCCGCCAACATTTAAATAAGCCTATCATGTGTAATGGCCAAATCTTTTGGCTCCCTGT  
TTTTGGTTTGTGGTTTTTGCCTTATATGCCTGTAAAAAGTTTGGGCCGGGTTGAACTTCCCTGCCCCCTGCGCAG  
TGCATGAGATTGACCCAGCATGCTGGCTTGGGCGCTCCTTTTTTGTGTTGTGTTTGTGTGAGATTAAGCTTGT  
ATAGTTACAGCGAGTTCCGCCTCAGTGTCTACTGGGTGCGCACCTCCCTGAAGAGGGACTCACTGAAGGGTTCTT  
TCATGTGGTGGGTGCGCTGGGAGATGTGTGACCACCCAGGTGTCCTAGACCCACTTGGACGTAAGGCCCTCTATC  
TTGTCTTGGTTTTGTCTCTATATTCTGTCTGAAATCTTGTGAGATCACATTTTCAAGTTTTGCAAACTCTCTTATGAGAC  
AGTGCTTCGAAGGGAGAGCAAAGTGGATAAGGACAGATGTGTGAGGTGTCCACATTTGTTCCGCTGGGAGA  
CTTTCAGGGAAAGTCAGGGGGAGGGCCAGGGATGCCTAGTGAACCTCCTCGGGAAAAGTCAGGGAAAATTTTCTC  
CTTGACGATCTGTTTCTGAGACCTGTTTCTAGGCCGTCTGATTCTTTTCAAGAACTCTGGTTGACACAGAGTAGGCC  
ACTGTTTTGCTTTGAGTCTTGTAGCCTTTGTAATCGTTTTTAACATGTGTGTGACAGAGCTTAAATGGGAAAGA  
CTGTGACGACCCCACTAACACTTACTCAGAACCATTGAACAGACGTTATGACTAGGGCCAACAATCTTTTCTTTGAT  
GTCAAGAAGGGACCTTGGCAAACCTTTTGTCTCTAAATGGCCAGCTTTTGGTGTGGGCTGGCCTTCGAGGGAA  
ATTTTAGCCTGCCTGTTATTCTAGGTGTCAAGTTATTTTCAAGTGCAGGAGGGCATCCTGATCCGGTACCTTATA  
TAATTGTGTGGCAGGATTTGGTACAAAATCTGCCACCCTGACTGGGTTCTGGACTTCCGGAGCTGAGGCAGCGA  
TGGTGGCAGTAGCCATGAAACCGAAAATGATGCATGCGGGTCTGCCAGAGCACGTTCCATCGGCCCCCTGAGGA  
TCTATCCTGAAATTGATGATGCCTTTTTTATTGACTCCTTCCACCCCTTACCCCAAAGAACTTCTAATCCTGATCC  
CTCACAGCTGCCACCCAGCAGACCCAGGGTGGCCTCTGTGACAGGACCGTTGGGAGGGACTCCTAGCTGCGA  
AGTCCATAGTTTCAAGGGAAAGTGAATCTAAACCAGATTCCACTGTTGCTTTGCCTTTAAGAGCTTATGTAGGAGGA  
CCTGCCATGCCCGGGGAGTGTAGTCCATTGCAGTACTGGCCATTTTCTTATGATAGATATGTTGGCAGATATGT

ATAACAGATATGTATAACTAATCACTCCTCTTTCTCATAGAATCCCTCAGGCTTAACAGGACTCCTTGAGTTCCTAAT  
GTTCTCCTACCAGCCCCTTGGGATGACTGCCAGCAACTTTTGCAGGTCCCCTTTAGAACTGAAGAGAGAGAGAG  
GATCCTGCTAGAAGCCAGAAAAAACGTCCCAGGACCAGATGGGACCCCACTAATCTCCCAACCTTATAAATGC  
AGCTTTCCCCTTGGCCCGTTCTGCCTTAGAGTTCAATACTGTGAAAGATAGGGAGCGTCTCACAGTCTACTGATGG  
ACTCTAGTGGCAGGGATAGAGCGGGCTGCATGGTGACCCACCAATTTGGCCAAGGTAAGAGAAGTCCTTCAGGG  
TTCAATGGAGCTGCCCTCCGTTTTCTTAGCACGACTAATGGAGTCTTATAGGAGATAGCCCCATTTGATCCCTCTTA  
GGAGGGACAGCATGCAGCTGTAGCCATAGATTTTATTGGTCCAGACTGACTCTGATATTATGAGAAAGTTACAGAG  
GTTAGAGGGTCTCCAAGATTATACTCTGCAAGATTTAGTAAAAGAAGCTGAGAAAGTGTACCACAAGAGAGAGAC  
TGAGGAAGAAAAGCAAGAGAGAGAAGAGAAAAGAGGTAGAGGAAAGAGAAAACCGGCATGAACGCCAGGAGGA  
TAGGAACTTGACTAAGATTTTGGCCGCAGTGGTAGGTGGAGAAAGTTCAGAGAAGGGTCAAGTCCAGGGTACCTGC  
GCAACAGGGCAAGAAGACCCCCAGGAGAACAGAGACCTCCACTTGAGAAAAGACCACTGCACATACTGCAAGAAA  
AAAGAATATTGGGCCAGAGACTGCCAAAAAAGAAGCAGAGGGGGCCCCAAAGTATCTGCCCTTGAAGAAGACAA  
GGGAAGTCGGGGCTCGGTCCCCCTCCCAAGCCTAGGGTAACTCACTCTGTGGAGGGGACCCCGTTAATTTTCTA  
ATAGACACAGGAGCTGAATATTAGTCTTACTGACTGAACCTTTAGGACAATTAGGATCAAAGAAGATTTTAGTTATGG  
GAGCCACTGGTAGCAAGCTTTATCCCTGGACAACCAAAAGGATTTTAGACATAGGAAAAAATAAAGTGACGCATT  
CTTTTCTGTGATACCTGAGTGCCAGCACCCCTGCTAGGCTGGGACCTTTGTAAAAAATTGAAAGCACAAGTCCA  
GTTTACTTCTGATGGACCTGAGGTATCATGGAAGAAGAATCCAGTGGCATGCTTAGTTTTAAATTTAGAAGAAGAA  
TATCACCTCCACGAACAGAAGTCTGAGACTTTACCTTTAAAGAACGATTGACAGGTTTTCCAGAGGTTTGGGCAG  
AGCAGGCTGGGATGGAATTAGCTAGGCAAGTGCCACCCAACATAGTCGAGCTAAAAATGGCTGCCAAACCCATTT  
CAGTCAGGCAATACCCCATGAGTCAAGGGGCTAAAAACAGCATTGACCACATATCCAGAGACTGCTATAACAGG  
GTATATTGGTCCCGTGACAGTCCCATTGGAATACCCCTTCTGCCAGTGTGTAACCTGGGACAAATGACTATGT  
GCCTGTCCAGGACTTAAGAAAAGTCAATAAGCGGGTACAGGACATTCACTCAACTGTGCCAAACCTCACAACCTG  
CTGAGTTCCTTACCACCTGAACGGTCTGTTACTGTCTGGATTTGAAAGATGCCTTTTTCTGTCTCAGATTACA  
CCTGAACAGTCAACTTCTGTGTGCTTTTGTAGTGGCGAGTCCCTGAAGGAGGATATACGGATCAGCTAATTTGACT  
AGGCTGCGACAGAGGTTCAAAAATTCACCCACTTTTTTGTATGAAGTGGTCCACCACAACCTTATGCCCTTAGGG  
AACAGAACCTCCAAATTTCTCTCCTGGAGTATGGAGATGATTTAATCCTTGCAGCTTCAACCCAGGAAGTGTGCCTT  
GACAGGATCAAGAAGCTTCTAAATGAAAAAAGTGAATTGGTGTACTCCTAAGAAAGCTCAGCTATGCCATATGG  
ACTTGACCTACCTAGGATACTCCCTCCGAGAAGGAAAGCAGTGGTTCTCCGAAGCTGAAAGAAGACTGTGATGC  
AGATCCCAACCCCACTCTGTGACAAGTACGTGAGTTTCTGGGAACGGCAGGCTTTTGTAGACTCTGAATACC  
AGGGTCCACAATGTTGGCGGCACCTCTGTACCCACTCACTAAAGAAAAAGTCCCGTTCACCTGGACAGAGGAACA  
CCAAAAAGCCTTTAACAGCACAAAGGCTGCTGCTTGCAGCCAGGCTTTGGCCCTGCCAGATTTGACTAAGCCT  
TTCACCATATACGTTGATGAGCCAGCTGGAGTAGCCCGCAGAGTCTGACTCAGACTCTGGGGCCCTGGAAGAGG  
CCAGTGGCCTACCTGTCTAAAAAATTGGACCCAGTTGCCAGTGAATGGCCCTCCTGCCTAAAAGCCATCGCTGCAG  
TAGCCCTACTTGTTAAAGATACTGGCAAGCTTACTCTAGGTGAGCATGTGAGTGTAACTCACTCCCATGCGTTAAA  
GAGTATTGTATGACAGCCCCCTGACCATTGGATGACAAATGCCCGGATGACCCACTACCAGAGCCTGTTGCTAAAT  
GACCGAGTGACTTTTGCCTACCTGCCATCCACAATCTACCACCTCCTCCCAAGACGGATGCCTCTACCTGGGT  
ACACCAATGTGCTGATATCCTGGCTGAAGAACTGGATCGAGAAAGGATCTGACTGACCGAACTTGCCAGGTGT  
GCCTGACTGGTACACAGATGGTAGAAGCTTTGTGGTGGAGGGAAAAATAAAGAGCAGGAGAGGCAGTGGTTGAC  
AGAAAACATGTAATTTGGGCAAGGTAACCTCCAGAAGGAACTTCGGCTCAGAAGGCTGAGCTCCTGACGCTAACT  
AAAGCTCTGCGGCTGGCAGAAGGTAAGGCAATCAATATTTACTGACAGCCACTATGCTTTTGCACAGCCACACA  
TTCATGGGGCCATCTATAGACAAAGGGGGCTACTTACTTCGGCAGGCAAGGAAATTAATAAAGAAAGAAATCT  
TGGCCCTCCTAGAGGCTATACACATGCCCAAGAAAGTGGCCATCATCCTCTGCCTTGGCCATCAAAGGGGCAAG

GTGCTGTAGCCCAGGGAAATCAGATGGCAGGTTGGGTGGCCAAACAGGTGGTACAAGGCATCCCTGTGCTGCCT  
GTAGAGAGTATAGAAGAACCAAAAGGGACCCCAGAGATCAGTTTTGAATACACCTCCAAAGATTATGAGATGAAT  
GAAGATCTTGAAGAACAAGGGAAGTCCAAAGGATTTAGCTACCATGGGATAGCAAGAACAAAAGAAGGAAAAAT  
TATTTTGCCTATAGAGAAGGAAAGGCATATGTA AACGCATCCATCCCCTGACACATCTGGGAGCAAAGAAATTG  
TGTGATTAAATCCAGTCTCAA ACTATTATGTGCTCAGGCTACTAGACGAACAAGTAACTAAATCCTGCAAGTGTG  
TTCCCTAATTAATGCTGCACGCCCTTAATGAACAAGGAAAACGACA ACTGGGGGATAGACCTGGAGTTTACTGG  
GAAGTAGACTTCACTGAGATCAA ACCAGGAAAATATGGTAATAAATAGTTACTAGTTTTCATAGACACTTTCTCAG  
GATGGGTAGAAGCCTTCCCCACCAAGTCTGAAACTGCTCAGGTGGTGACCAAGAAGATCGTTGAAGAGATCCTAC  
CCCAGTTTGGGATCCCCAGGGTAATATGCTTGGATAATGGGCCTGCATTTGTTGCCAGGTAAGTCAGGAATTAGC  
CACACATTTGGGGAACAATTGGAAGTTATATTGTGCTTATAAACCCCAGAGATCAGTATAGGTAGAAGGAATGAA  
CAGGACTCTAAAAGAAACCCTAACTAAATTAGCTTTTGAGACCAGTGGTAAAGACTGGGTGACCCTCCTCCCTTT  
GTGCTCCTTAGGGCCCCGAAACACACCTGGGTGTTTCGGCATTACTCCTTATGAAATTCTACATGGGGGACCACCCC  
CCTTGACCGAGTCTGATGGGATATTGAATCCCAGTGTGACTCTCCTCACCTCTTCTGTTTACCCATTTAAAGG  
CCGTAGAAGTTGT CAGAACACAGATCTGGGACCAGATTAAGAAGCCTACACACCAGGGAGCAGTGCAGTGCCCC  
ACAGGTTCCAGGTGCGGGGACTCAGTTCTGGTCTGACAACATCGAGCTGGCATGCTTGAGCCACGGTGGAAAGGA  
CCTTATCTAGTGCTGCTGACCAGCGCCAAGGTAGCAAAGGTAGACAGGATCGCTGCCTGGATCCACGCATCCCAC  
ATAAAAAAAGGCATCCAACCAGGATGAAGACGACCTCAGAGAAAATTGGACAGTGGCCGCTACTGATAATTCTC  
TTAAACTGTGCCTTCGCTGTACACCAACCTTGGGTAATAATCCTCACACTCTTATGACCCTGACATGGGAGGCCATC  
TCTCAAGCTGGAGATACTGTATGGAGTACTTCAAAGCCCCCCCCCTTATACATGGTGTCCCCCTCTGTTTCCTGAA  
ATCTGTGCCCTGATAGATGGATTAGATGCCTGGGATATCCCTGAAGAGTCACATGAAACGGTGCCCCAAGATGAG  
GTAATCTATCACAAGCAGCCATATCACCAGGGGTTAAGTTCCCAAGGAAAGTACATTGCAGATATACCAGGCTGTA  
GTAGCAGGTCTCAACAGAGGAGACTTTGT CAGGAGCCCTTTTATGTCTGTCCCAGGGATAGGGCAAATAAAAAAG  
AGGCTCGCTGGTGTGGGGGAATAGAGGGCAACTTCTGTAGTCAGTGGAGATGTGAAACCACTGGTACCACTCATT  
GGGACCCTTCTCTAGCTTGATATTATTATAGTATCCAGATGAAATAAGGGCCATGATTCCTTAAACATCACTTTTA  
CTCAAAAAGCAAAAAGAGACAAAAAAGATTGTATAAAGGGAAGACTGTGGGGCCTAACATTTTATGTGACAGGGA  
CGGGCCCTGGATTACATTTAAGATACGGCTAAAGATGAAGTGTCCCCCAACCCAGGCAGTAGGACCTACCCCCG  
TTCTTGTTAAAAAACCTCCAATGCCCTTCCAGACCTACTTTTCCCGGACATACCCTAGTTGGTCCAGCTATTCCAA  
CAGAAGTCTATACCCTTCTCAGACCTGAAACTTACATTGCCCTACTCCCCAGATACTGAAAACCGTCTGTTTA  
GTATGGTACAGGGGGCTTTTTGGTACGCAATTGTACCAATCCCAACATCACTAAGTCTTGTTGGCTGTGTTATGCCT  
CCAATCCCCATATTATGAGGGAGTTGCTCAAGTCAAGACATAACAATAAGGCTGAGGACAATTCTCAGTGCCTTG  
GGGAGAAAACAGAAAATAACATTAGCAGCTGTCTCGGGAAATGGACTTTGCCTGGAACAAGTCCCACATGACAA  
ACGGTAACTCTGTAATCAGACTCATCATCTCCAGTCTTCCAGTAATAGAGGTCAGTACTTAGTCCCTCCCTTAGTCA  
CAGTATGGGCTTGC AACACTGGACTCACTCCCTGTGTATTTACTTCTGTTTTTAATACTTCTAAAGATTATTGTCGTT  
TAGTTCAGAGGGTTCCTAGGCTTCTGTATCATGATGACAGTTTTTTGTCAATGGATTCAACCACTGGACCCGGTATA  
AAAGGGAACCCATTACCATGACCTTAGCAGTGTCTTTGGGTCTAGGAACAGCAGCTGGGGTGGGCACAGCCACAA  
CTGCCTTGATACAGACCCCCACTATATTCATGAATTGCACAACCGCTATGGATGCAGACCTAGGAGCACTAGAGC  
AGTCCATCACCAA ACTTGAAGAATCATTGACCTCGCTACAGAACAGGAGGGGGCTAGATCTACTTTTTCTCAAAGA  
AGGTGGACTTTGTGCCCACTAAAAGAAGAGTGTGTTTTTATGTAGACCATTCTGGTCTTATCAGGGACTCCATG  
GCTAAGCTCAGAGAAAGGTTAGAAAAATGAAGCAAAGAAAGAGAAGCGTATTAAGGATGGTATGAAAATTGGTT  
TAACAGGTCTCCCTGTTTTACGACACTGATTCCACCCTGGCAGGCCCTCTGATTATTTTTTCTCCTTCTTTCTTTTG  
GGCCATGTATTTTAAATAAGCTGGTTGCTTTTGTAAAGATAAAAATAAACACCATACAAGTCATGGTCCCTCAGACA  
GCAATATCAACAAGAAGAAAGGTCGTTCTAAGATTAGAGCTATCCACTAAAAGAAGTGGGTAATGAACAGCAAAA

ACTTATAATTTTGGGTCTTATAGCATTGTGGTATGTAAGTTCAAGAAATTCAGGGCTGAAGAATAGACCCAGGCGG  
GTCCAGGCACAGCCATACTCACCTGTAGCTAAGAATTTCCGGCCATAAAAGATTA AAAAGAGAATGCAGGAACT  
AGCCACTGCTATCAGGGCGGACCAAATGGCCATCTGGCAGGATGGCACCTCCCTATAGACCCATAAATCATACT  
TGACCAGGTGTCCTGCTGACCTCGAGAAGTCCCAAGCCCTTGTGTCTTCTCCATTTTAGCAGGTACATATTACCT  
GCTAATTTGTAATCATCTGCCGCCATTTAATAAGCCAATTATGTGTAATGGCACAAATCTTTTGGCTCCCCTGTT  
TTTGGTTTGTGGTTTTGCCTTTATAAGCCTGTAAAAAGTTTGGGCTGGGGTTGAACTCCCCTGCCCCCTGCGCGGT  
GCATGAGTTTTCGTCCTCAGCATTCTGGCTTGAGCGAACCTTTGTTGTTTGTGTGTTTTACGCCATTAAAGCCTTGTA  
TAATTACAGTGAGTTCGGTCTCAGTGTCTACTGGGTGCGTGCTTGCCCCGAGAAGGGACTCCCCATGGGGGTCTTT  
CAGTAGGTTTTCTGAATAAGTTTGTATTACATGGCAAAAAAAAAAGATTTATTATATTCATTTCTTCTTCTCATGG  
TGTTTAAAGGCATATATAATGCAATTGAATACTGCACATTCCGATTATTAACAGTTTTATACCAAGTTCCAAATTTAA  
CATAACCACGAAATGAGAAAGCGTACAATATATATTCCAATCATGAATAAGCAAATGAATGTAGGGAAATAGTTTTC  
AGGTAATAAGATACATAGCTATTAAGACATGATCAGAACAATTTAGATCAGAGGATATTAGCCTAAGCCCTATGAC  
TTAAATTTCCCCTTGGCTGTATACTCAGAGCTCTGTGTCCTGTCTGTTGCTGATTGGAACAATGCTTTGTTTTTCA  
GCTTCTGCATGAATTTAACATGGTCATACACTATAGACCGTCTTAGCAGGAATCAACTTAATGTGGATCTAGGA  
ATCTGTTACCTGTAGAGAAGGGCCTCTCTGTTAAGAATGATCAGTGACCATTGTACCTCATTGTTTCTACAGAGGAT  
CCTAAAGGGTGCATAACCTGCTGTGAAAAAGATCTAGGCCCTCTAATCCATGACACAAGCCTAGTTTCCATTTGTT  
AGTTATGTCAGATTTTGTACTAATATATTCAAGCAAAGTAATTAAGTATATATCTGTTCTATCCAAGATTTAATA  
CTATTGGTTGCTATTTTGCATTGAATCCTAGAGCTGATGAACCAAGTAAAGAACACTGGGAAATCACCTAGATAAA  
AGAGATAAAGTGTGTGATGGTTACACCTTGAATGGCAATGACTCTTTGAATTAAGAGGCCTTAAAAAGAAATGA  
AATAGAACTTGAGTTTCTCAGTAATGTGAGTCACTCTGGTATCAGGTCTCTTAGCCCGAGGATACAAGAGAAGA  
CTCTAACCAACATCATTGACAGTCTTGGTCTTAGGTCATCATGATATCCCTTTCTATGATCCCAAGTGTATTACAATA  
TAATAAGTAGACCCAAAAGGCAATAAAGTAAAGACAGCACTAATCACTGAGTCTTAGGCATCTAAATGCTAGG  
CAGTCACTCTGTCAACTGAGCTATGTACAGACTCTGTTCCAATATTCACAGATTTAAGGTTTTCCAATGAAGCCTA  
GAAGCTGCTTTTGAAGGAAGATGTGTTCTATGACTATGTCCTAGCACAGTCTGCTGGAAATGGCACCTCAGTTTCT  
GGTCAGTACTAGGAGAGCAACAGCAGGGAGGTAAGGCTATTCACTATTGCGTCCCCTGACCCGGCAAGAAAG  
ATACAACAACTAGAATCTTCCACAGTAAGAGCTTTATTGCTTGCTTATCAGGAAGATCCCGAACCGGGAAAATGG  
CGCTGCTTTTATAACCTGCAGCGTGACATTTCAGCACCTGATATGGCATGACAGCTCCTGATTCAATTGCTTGCCAT  
CACCTGAATATTTACCCCGAGAATGGGAGTGACTAGGAGTGAATCACTCTCGCACCTTCGTACAAGGCTTCTTT  
ACTAGTTAGCCACAGCGGAGGCCCGGCCATCTTATATGCTCGCGGCACACACAGCTCTCCTCAGAGATTACTGGT  
GGCATGCACGAGATTGCTTGCAGTACGTACCTGCTCTCCACATCTTCCCCTTTTTATTTTATAAACTTGAGGCTGG  
TCTAGGCCTGTGTAATTTGCCATCCACTGTGGCTCATGTCTTAGGTCATTCTCCAATGTCACAGCCTTCTCTGTC  
ATAGGGTAACCTATCGCCACCGGGCCCCGTGCTTAGGTTGATCTGTGCATGAGGAAAGTTGCCCGTCCCTGGAT  
ACCACAGTGCTATGTGACATTAACCTACTAAATAAACTAGGGCGAACTCTATAAAAGAGGACAGCCACCAATGTCAA  
TTAATTTTTGAGCATAGATAGCCAGATTTCAAGGAAGGCCCTTGCTTGTATGGCAGCAAGTGCTTGGGTTATCAAA  
ACCTTGTACAGTGTGTTGTTGGGTTCTGAGCTTGCAAACCAACCAGAGCATGACCACAAGTCCACAGCAGGTGGCAA  
CGCCAAATAAACCTACCCCAACCATTCTTAAATAAGAAAAGGCAGATGAAATCCAGGAGGAGAGGAACTCTG  
TCAATGACAGGTCCACTCGTGTGAGTTGATCTTTAGAACGTCTGCTCTAAGGACCTCAATGGTCTCATCGAATCTT  
TCAGACCAGTTTCTGCAAGATATAAAGAAACCTGTCTAGACAAATTAGCTGCATAAGTAAATTTTCAATTGGAC  
ACTGGTAATGCACAGAGCTTCCAGTTTTCTTTCACAACCAACTGGGCCATCTGGTATAGAACACCTATCTGTTCTT  
CCGCCAGGTCAAGGCACTGATTCAAAGTCATCAGCCCTCCCTTAACTTGGTACTAGCAGAAGTTTGGACAGTGAT  
GGCATCAGCCAGATATGCTGAAAGCTGATTTAATTTTGTGCTGATTGAACCGCACTAAACATAGCATACCCTGCA  
GCTGTAGCAGCAGCTGCACTGGCTGAAATTGCTATGATCACGGCAGCAGTAATGCCAAATCTCTTTTTTCAA

ACATAGATAAGATGGAGGTTGTATCCACCAGAACAGGGATCCAACGTGGGATCCGTGCCACCATGGCACGGGTG  
TTCTTTGTTACATCCCAACATTGAGAAATCCAACAATTATCATTGGAACAGATTTCAAATGAATCATTGAAAGAAT  
AAACAAGAAAGCGGGTTAAACACAGACTGTGGTAGATGGATAATTAATCTGGTTTACCAAAGTTTTATTAACCCA  
GTGATCTCTGCACTGGTATTACTATATCCATAAGAGTCCAGGGAGGCATCATGTATTCCCAATACTGAGCAAATCT  
TGAGATGCCAGTAAAAGAAGCCTTCCAACTGCTCCTCCCTGGATAAAGATCAAAGGATTGAGTTCTGTACAACCTG  
CCATTGACTCCACAAAGCACCCACTTGTGAAAGGGATGCATTCTAATATCCTGTATGAAAAGTCCCTTTTTCATAAC  
AAATTCCTTCTCTGGGTTATCTATCATGTTGGGAGAAAAGAAAAGGTTTTACTCTGATCTGCCAATGAGTGATG  
GAGGATTGACAATCAGACCAAGGCAGGATCAGCCCTTCATCTTCCAACTACAATGAGGGGCTATTTTTGGTTGGT  
GTGGACGTTTTTTGTCTGAAAAGTTAGGTGGTAGAAATGTACCATTAACCAATTTACCTCGTGCCAAAAGGTCCG  
ATTTGTAAAGTTATCTCTACATTGGAAGTATCTTGGGTTGTGCTCACGCAACCTCCTCTATGCTCATTAACTTCCC  
CAAAGCTTGGGCTGTGAGGTTGATACAATTCCTGGTCCATTAATCGAAAACATAAAGAACCCTGTTCTAGTAAA  
GTGCGATTTTTCTCTAATGGTGCTCGGGTTGGGATCATAGGGTAAATATGGCAAATCCACTGTTTTATCAGTAGTA  
AAGAATTTTGGAAAACTATAGCATCATAGCGAACTGGCATTGGTTTAGGGAAAGTTGAGAGAATAGCCCATCTC  
TGCTGGCCATTATACTAGGAACCTGAGACAAGTTCAGCATTGTCAGGATCAGGAACAGTCCCTCGGGAGGTCAGC  
ATCTTCTGCACCATCCTTGATGAATATCCTGGGGATGAGTCATTCCGGCAGCCAAAATGGGTTGTCTTCACTCTGTG  
AAAAACACAAACAGCTCCCCAGGATCTGATTAAGATAGGATCCGGGCCTTCCACTGACCAGTTAAAACATCCTT  
CCCTTGACCATTTCTTTGGTCTATCAGGGTCTGAGCTATGTCGCTCAGCTGCAGAGTGCCCTGCTCGTCGAGAT  
TCAAAAAATTAAGTGTAAGAGTGCCATAGATACTGCTACTTGGCACTGAGGGCAGAGTCTCATCAACTCCCC  
TTTCTGTTTTATAAGATTTGAGTTTGGGGTGGGCACGTTCCACAATGCCTTGTCTTGTGAGTATTATAAGGAAGGCCA  
GTCAAATGAGTGACATCCATTTGATGACAAAATTGTTGAAATTAAGTAGAATTATATGCTGGCCATTATCCGTTTT  
TAGAATTGTGGGCTTGCCCCACACACTCCACGCTTCTAGGCAGTGCTGTATAACATGAGAGGCTTTTTACCTGTTA  
AAGGTGTGGCAAATATTACACCAGAGCAGGTGTCAATAGAAACATGTAATATTGATTTCTCCCAAAGGAGGAAA  
TATGACTGACATCCATTTGCCAGACCTGTAATGTCCTGACGCCACGAGGATTTACCCCTACATGAGGAGTAGGTAA  
AAATTGACAACAGTTTTGACATTGGGTGACAATGTCACGAGATTCTTCTGGTAAAGTAAAACGGTGGTGTAAAT  
GTCTCAGGTGTCACATGAAAGCATTGAAATTCTTTCGAGCCTCTGCCTGTGAGGACAAAGCAGCAGCCACGA  
TTCTAGTGGCTTTGTCTGCTAAGTCATTTCCATGAGACATGAGGCCAGGAAGGCCAGAATGAGCTCAAACATGAGT  
AATATAGACAAGATGTCTTCTGTATAACAAGGCTGACTGAATCTTTGAAAAATGTGAGCAAGCTTACTAGTTGGT  
TTAATTAAGCCTGCAACTTCAAGCATATTAAGTGCATTGAACACATATAAGGAATCAGATACAATATTGAGCGGTC  
CCAGGAAAAGTTTCAAGGACTTCTAGAACTACCAAACACTCTACAACATGGGGTGATGAATCATTATATTGTTTAGA  
TGTTACTTGGCCATTTACTACATATGCACCTATACCAGATTTGGATCCATCTGTATACTACTACCCCATCCGGAAG  
TGGGTGTTTACTGTTATTATTGAAACACTATAGCTTGGCTTAAAGGCAAATTGTAATTTGTATGTTTTGGATAAT  
GGTTATCAATTTGCTCTGAATAGGAGGCAACCAAGACTGCCAATCGTTGGTTGTTGCTGCCAGGGTTTGAACCTG  
AGCAGAAGTATAAGGTACACTTACTATATAAGGTTCTTACCCGAAATAAGTAATGGCTGCTTTTATCCCCCTAAGTG  
CAAGTTGAGCAACTGCATTAGGATACCACTCAATGATTTTTGCAGGGGAAGCATTAGGATGGACCCACAACAAGG  
GCCATTTTGCATAAGACCACTGTTGGTAACTGTGCAGTTTTTAATATGCACAATTCAAATGACTTTGACTCGTCA  
ATGCGTTGTAATTGAGCATCTTGTAGGGCCTTTTCTACAATTTGTAAAGCTTGCATGCAGCTGGGGTAAAGTGCTCT  
GTGGGAGGAGATATGGGTATCTCCCTCTAATGTGTCAAATAAGGGCTTTAATTCTGCTGATGGAATTTTCAAAAAG  
GGTCTCAGCCAATTAATATCTCCTAACAATTTTTGAAAATCATCAAGGTATGTAGTTGATCTTTCGAATCTCTAAT  
TTTTGAGGAACAATTTTGTGAGGATAAATAAGTGACCCTAGGAAGGCTCCATTGAGCAACTGACACCTTTTCGG  
TGGCCACTGCAATCCCCATTGCCCTAACGTTTTTATTAATATAAGGTATGCATCTTGAATAACTCTGAATTTTTAT  
GGCAAATCAAAATGTCATCCATATAAATTATCACCTGTAATGATGGAAAATGTTCTCTAACTGACTTAAAGTGCCAAT  
TGACATACAGTTGACACATGGTGGGGCTATTCGCCATCCCCTGAGGTAGGACCTTCCATTGGTATCTTTGATCTG

GCTCTAAGTAATTAATGGCTGGGATCGTAAATGCAAATCTTTACTTATCTTGAGGGCATAAAGGTATAGAGAAAA  
GCAATTTTTAATGTCTAGGATTATAATTTCCCAATTTTTGGTAAGGCAGAAAGTAATGGTAGCCCTTGCTGAACTG  
GTCCAAACAGATGCATTTGCGCATTAAATTGCTCTAAGATCATGTAATAAGCGCCATTTGCCAGATTTTTTTCTTAATT  
ACGAAAATAGGTGTATTCCAGGGTGAGGTAGAAGGCTCTAAATGACCCAAGTGTAGCTGTTCCAGAAATTAGTTTT  
GTGGCTGCTTCTAATTTTTAGAGGAGAGAGGGCCATTGGGGAACCCATACAACCTCCTCTGTAAGCCATGGTATGG  
GCATGGAACCCTCAACAGCTGTCTCTAGAAAAAATCCAAACCTTGCTCCCATTATTACCTTTTTGAGGGATAGGT  
TCAAGTTTACCCTGCTCTCCTTTTTCTAATCCCCTTCTTCTTTATAGCATATTTTTCTAATCATTTGAACAGCTTGTGG  
CGAGCATGCATTAGTTAAGGTCAGTCCTAGTGCCTGTAAGATGTCTTTCTCCAGAGATTTACTGGGAGTGGTAAG  
ACATAAGGAGTGAATCGTCCCATTGACCTCAGGCGCTGTCCAGCTCAAAGAACGGGAACTAATAGTGGGACAG  
GACTGATAACCGAAACCTTGCAAAGAATGTGATGACTGAATAACTGGCCAAGTTTTCGGCCACCAGTGAGAAGAA  
ATAATACTTTTGTCTGCTGTGTCTAAAATCCCCTTAAATTGTTCCCTTCTATACTAACTCTAAAGAAGGCCTG  
GAATCTAAAGGCATTATTAATAAGCCGAATCATTTCCAATAGAACCAATCCCCTCTGGTAGCTTGAGGGACACCAG  
AAGAGGGAAAACAGCCATGTAGGCTTGGCTGAATTAATACTGAGCTATTCTATCTCCTTGTAAGTAAAGAACGAC  
ACCCTGAGGACAGGAACAGAGAACTTGAAGTCCCCCTCATAATCTTGATCTACATCTCCAGGGTGAACAATAAGA  
CCTTGATAGTGAAGGGAAGCCCTGCCAATATTAGGCCGACACTCCCAGATGGCAGAGTCTTTTATAGTTAGTAG  
GTATAGGCTGCACTCCCATTGAGGGATCAGCATGAATTGGGTGTTGCCCTCGGACTGTGGGGTCCACCTTTCGCC  
TGTTGAGGTCCCATATGTTTTCGGGCCCTGAGACCTGAGGGCCCTGACTGGTTTTTTGAAATGGTGTCAATTATCTA  
CTGCTTGAGGGAATCCTGGCTGCAGGAGCCTGCCTCGAATGTCCCTGATTGAACGACAAGCGCTAGTCCAATGAT  
ATCATTTTCCACACTTAGTGCACAATCCTGGTGTCTCCTTTTAAACAAGGGCTCTACAGTCTTTTTTAAAGTGTCCCA  
GTTTGCCACGATTATAGCAGAGTTTGGCTCAGCCATGTCAGTGCATTTTTGCACTTGTAAGTGGCAGCTGTAA  
ACCTGCATTAGTGAGTGGCCACCAAGTTCACGGCAAACCTTCGACCAGTCTGCAGTCCCTTGCTTTTTCCAGGTG  
TAATAGCCGCCCTGCATTCTGGGTAGCCTGTTCAATATCAACTGTCCAATTAAGGCATAGCTGCTTTTGTATCT  
CAAAATATTCTCGTGTGCCTCTGTCAATTCTAGCCACAAAATCTGAGTACGACTCCTGGGAGCCCTGAGTGATCTTG  
GTCAAATGCCCACTTGCTCTCCCTTCTAGAGAGTGCCTTCCATGCCTTAACAGTGGCAGCTGAGATCTGGGCGTA  
TGCTCCCAATGATAATCTGTTTGGTTAGCAGCATGCTGTCCCTGACCTGTAAGCAATCAAATGTCCATGTCTTT  
GGTTTCTTCCATGGTGGCATTGGCCCTTGCTGCGTCTGACAGGAGTCTGCCACAAAGCGTTCCATTCAAGATA  
CATCCCCATACTGGGGGCTGCAGCTTTTACTACAGTCTGGCAATCACCAGGAGTCATAGTGTGAGTTGCAAGCCTT  
TCAACTGTGCTACAGTGAATTAGCTCTGACTCCATAACACGGACTGTTTCTGCAAGCTCCTTAATCTGTATATATT  
CTACTGGAGCGTGAACACGCCCTCCCTCAGCTCTTTCAAAAAGTGGAAATGCCTGTTGTATCTTCTCTGTTCTCTT  
TTGGTATAAATGAGTCTGAATGATACCTCTGCACATAAGGCTCAGAATGGTGCCTCTGCACATAAGGCGGAGGTG  
CACTAGAACCCTGAAGTTGCATATCCGAAGACCGCGCAATGATTTGACATTTGTCTCTAGCTGCTTTCATGTTATTC  
TGTAAGTGAATTAAGTGTCTTTCATCTGACTGGTATCTTCTCCCTCACAACCTGTGCTTTTCTCTAAGTCTGTTT  
CCTCATAGGAATAAGTTCTTATCTGATTCTGAGCTACTGACAGCTAGCTGCTTAAACTCATCTAGTGGTGGGTAGA  
GGCTTCTTCTTATGTGCCTCTCCAGCTCGATCTCCCTTCTCTCCCTTCCATCCTTTTTCTAATCTCTCCCCAG  
GTATTTTCCCTGACATTCTTTTTCTCGGTCTCAAGGCTCATGGAAAGGCCTAAATTCTCAGTGCACCTTGTGTTCC  
TCTCTATTTTTCTCTCTCTCCCCGCTCTACCTCTGATAGACTTTCTTGAATTTCTGTCAGAACTTTCTGCCCGCTTCT  
ACCATTTGCTGACAATCCTCATCTCTTAAACACGATTTACCAATTTCATAGCGGCATAATCCCTCCTTTAAGTTTGC  
CTTTCTGTTGTTCCCTAACTAGATCTCCTTTAGTTTGTCCCAAGAGGCGACAGTTAATGACAATGAGCAAGCATA  
CATGGTGAACACGGTCTATCTCTGACAAAATCCCTCTTAGGCTTCTAGTGGCGATTTTTAGGCCACACTGCTTCAG  
GACTGAGCGTAGGCCACTACTATAGAATGGGAGATTCCCATACTGCCGCTGTCCAGGCCTGACCGGGCTGAAA  
TTGGTTGCTGTCCAGGTGCTGTCCAGGCCTGACTGCGACTAAGAACCAGTCAACAGTTCCAGTGGTGGAAACAAA  
ACGAAACCAAAAAGGAAAAGTGAATCGCCATGCAAACAATCAAAGGGCTTCTAACTCTGGAGAACTTCAAGAT



TGTACGTACCTTGTAGAGACTTTTGTCCACAGTTCTGATTCTGCCCGTGAATGAAGGATCTTCCTTGCGCTGGTG  
TGATGACAGTTCCCGGGTTTTGGCACCCTTATTGCGTCCAGCTCGACCAGCAAGAAAGATGCAACAAACCAGAAT  
CTTCCTCAGCAAGAGCTTTATTGCTTGCTTCTCAGGAAGATCCCGATCCGGGAAAATGGCACTGCTTTTATAACCAG  
CAGCGAGACGTTTCAGCACCTGATATGGCATGACAGCTCCTGATTATTGCTTGCCCATCACCCACTATTACACC  
CGAGAATGGGAGTGAAGTAGGAGTAAATCACTCTCGCACCTGCGTACAAGGCTTGTTTACTAGTTAGGCACAGTG  
GAGGCCCGCACCCTTATAATGGTGATTGCTCACGGCACACATGGCTCTTCTCAGAGATTACTGGTGGCACGCAC  
GTAATTGCTCGCAGCACGTACCGGCTCTCCACAATTCACCACGATATCTGCAGTCCCTTCTATGAATAGTCTGTTGT  
AACCTGGAGAGTTGTGGTCATCCACTCTGATACCACTACTGTTGTAGCAACTTGAAGTCTCTTAAACCAGTCAGTC  
CCTTCTATAGAGATGATTATCCCTGAAGCATCTACATGGGAGAGAGAATGGGAGCATAGAAATCAGAGAGAG  
GCAGAAATCTAGACTCAAGCTGAGAAAAGAAAAGTGGTCTGGGGAAAATACAGTGATTTCTGGGTAGA  
GAATATGGAGCATCCAGTAAAGGTAGTTCTGAAGTGGCTTGTTTATCTTGAAGGCAGACTTGGGCATTGTATAAA  
GCTCTCTTGAAGATCTCATAACAAAATTTTGTCAATGTCTGACTCAGAAGTAATATTTTACAGCAGTATCTAGAAT  
TCATGCTGGAAAAAAGTGGAGAAAAGAAAATCAGGATTTTTGTGGGCCAAGGTCCATGACATAAGGCTTCAGATAT  
CTAAATGGCAAAGCTCATGCAGCCAAGAGAAAACCTTTACACAGACACCTAGAGTCTTGTGGCAATGAGCCAGCA  
TCAAATTCACCATAACTATCCATATTTTAGCATTCTTGTGCTATGATAATAAAGGACACAGCCTGAGTTAATATAA  
ATCATTAGGTCTGCTTTTATTGGGTTCTAACTCCTGGGGCGGGGCTCTAAAGCAGGACAAATCTTCTCTGATCA  
GCAGAAACATAACATGACCTAGTCATGTCGGGCACGCATGCAGAGCTTAGAGAATGAGAACCCTGAAGGGCA  
TAGAACCTCAAGAGATTAAGAAAGAAATTGACTTCTGTTTGGTATTTGCCTGTCAGAGAGAGAAGCACTTAAGGC  
AGGGTCATCTCTGCCTTTTATTGTTTCAGGACTCAACACTCTGCAACTTTGTTTCAATACCTTCTTTCTGTTAGCCATT  
AGCTTGCTTTAGCCTCCTAGACTCAGTGTTGCTGAGTGTGAAACAGATTATACTCCTGACAGCCTCAGGAGCATG  
TAGATGTGTAATTCACACACAAGTACCAATTCAAATGTGTTGTGCTGCGCCAGCGGCTCACATGTCTGGGTTCTAAT  
CTGGAAAGGAATCTTGGAAACCTGGAAGAGAACAGGGAGCTAGGCAGAGAAGAGAAAGATGTAGCTAAGGCAA  
AATTCTGAACAAAGCTCAATTTTACTATTTCTGAAACTCATTTATGAAGCAGAGGTAGGGACCTGATTCCCGCCAAA  
TCATCTGGAGTAAAGTTGCAGGTGAACACGTGATGGGTCCAGAAATGCTAGTTGGAAAGCAGCAGCAGTGGGA  
GTGGCAGGGTTATAGAGCTGCAAGCTCTGCTGAGATGCTCTCTAATACTGAAACCTGAGCAGATCAGCTGAAAAT  
GAAAGGAAGCTTGTTAGGTATAAGACTAAAAATAAGGGTTCTGGGCATGGAGGAACGACACTTGGGAAATATC  
AATCTGATATATAAGGACAAACAGAAATAGACTAGCAACAACAGTCCCAGAGAATAGAGGGAGATAGCTTACG  
AGGTTAGTCAAGCACCATTTGCTCTTTGGAATGCCTAACTGCTCATCCATCCAATTTTCTTTTAAACCATCTCCTTTCT  
AATCTACCAGCCAGATAATATGCAAAGCCTGAGGCACCTTCTAACATTCAGTCTACAAGGGAGGTCACCATCAAA  
TCTCCACCTCAGTGTTGAGGAAACACTGTAATAAAAGACAGAAACAGTGTAGGATCATAAAAATCTTCTGATTGT  
AACTACTAGAATTTAGTCTAGCTACACACTTTTATAAAAAAGTACATCAATGAAATTTATATTTTAGAGTTGTTT  
CTACAACAGAAACAAACGATCTACATTTGGGGTTGGTCTTCTATTTACATAATCAAATCAGGAAAAAAAATTCCT  
CACAGGTGCCCAAATTCAGAGTTTTAGTGAATTCCTAATATTATCAGGGTTACAACCAAGACTAGCCATCATAA  
GTATACCTCTTGCAATAAGACATACAATCATATCTCCTTATATTATATTATTTTCAAAGAAAAGCAATAGTTATGC  
CTAGCATAGTATCTATATCCAATATACAACTGCAAATAAAGTATATGAATTTTTCAGGGCAGAATCATGCTAACAT  
GAGATAAAATTCATATACAACACTACAATCATATTTTATCTTTTAGAATAGATTACAATTTCTTAATTGTAACACAATA  
TAAAATCAAATTCAAAGCATTGTTTACTTTCAAAGTACACTGACATGATTATACATTCTATTCAAATAAAGGAAA  
AGAAACATAAACAGGAAATATTGGGAAAATCAAGATCAAATCTAGCTAGACAAACCCCAAATCCTAAATTTATGTA  
CATTGTGGCTTAAAAAGCTTCTCTATCTAGTTTCATGACTACAATATATTTCTCTGTCTTGAATGGTCCATTCTTT  
GTGTGTAGCTTTCTTTGAGAGATATCGCACAGCTGTGGACCTTCTTACATCCTGATTGCTATATCACAATATAGGCT  
TCCCTTTCATACCTTCACTAAAAGCCTTTCTAGGCATCTATGCAGGGACTTCGCTGCAACCTGGATGCCCTCAGTGG  
CTTCCATAACCACGTAGGAAGACTCCATGGCTCTTTCTTCTGTATCCTTCATTAATCTGATGAAAGAACTACATG

GTGGATGTTGCCAAGTCTTTTTGCCTGCTTTAGATAGAACCTGCCTGCTTCCTTGAATATTTTTTCATAAATTTGATA  
TGTTGTTTTCTGCTATAAACAGATCAATCCTTGGGACATTTCTTTGCACAAGTTGCAGGATTAGCTTGGTGGATAC  
TCACCTCGAGGAAACAATTCCCTTTATTACATTACTCCTTATATCTTTCAACACTAGCTATGGCTCCCACAAAAAAT  
TTCTGGTGCTCTTTTTTCTCCAAACTTAAATTCTAGCTCATCCCTTAAAGAATGAGTACAATCAGGAAAAACAAAAG  
TCAAGAAGCATTAGCGATGTGGGAATAAAGTACAGCTGTACTGCTGGTGGGTGCTTAAGTTGGTACATCCAGGAT  
AAAATCAGTGTGGAATTTGCTAAAAATATCTAAAAATAGAACTAACTGGTGACTCACCTATATCACACTTGAGTGT  
AGAAAAGATAGCATGGTTATCTATTGATACTTGCTCAGTCATTTTTGTTGATTTTGTTCAAAAAAGGAGATGCAA  
TCAGCTGTAATAAATTTGCTAGAGAGTATATGGAATTTGAAAATACTATCTAATAAATGCGTTAAATCAGGCCTAT  
AAAGAGAAATGCTACGTGTCTGTAATCACATTTGGTCTAGCTTCAACTATTAGATTTTTTGTAACTTGGAGTATCT  
GTGGAGATAAGGAACCCCAAAGTGGCACATGGCATGGAAGAAAGGATGAAGCCTTTAGGGAAGGAGGGAATGA  
CAGAACACATGCAACATAGTAGGAGGAGGAAACATTAGAGATTACAAGTTTAGGTAAGCATGAGTATAGGATTAT  
GTCTGTTATTCCATACGGAATGTCACATTTTAGGAAGTTTATTTAAATATTACATTTAAGTGAATTACTCTTGGTT  
ACAGTCCAAAACCTTGATACTACAACACTTTCTGAAGAAACCACATACTCGAGTAATAGAACATGAATAAATAAAGT  
TATAACAATCTTTAAATTTAATCTTAGGGCTTGCAAGTTATATAGTGGCAGAATGTTCTGTTTATGCTACTAGCAG  
AGAAAAGTAATCAAGCATATTACACATCTGTGATCCCTGACAACAAGATTAGTGACTCATTTGAAATATACTGTGTAC  
ATATATATCATCTAGGTTAAAAGTAATATATTCTGTTATCTATTTTTCTGTGTTACTTCTAGATCATAGGAACTATT  
TACTGTTACCTAGAACTGATTTTAGAACGAGGACAGAATACTTTGTCTTAATAATTTTCATGCCTACCTAAACATAA  
ATACACAATATTGTTTAAAAATAATAATTATGAATATTTTCTACCTGCATTGGGTAGTGCCATAATAAGTTCGTATTT  
CAAATACTGATTAATAATATGAAACAAAAAATGTTAAATTTTAGGATAGATAGTTATAATACTTCAGAAAGTTGTC  
AACAAATTACACAGGGAAGGAGAAATAGAATACATCGTTTTCTCCACCTATGGTTATTGAGATTTTGGCCAGGTAT  
AGTAGCCTGGGTTGGCATTGAGTTCTTAGTGTCTGATAACATCTGTTTCAGGCTCTTCTGGCTTCTCTAGTCTCT  
GGTGAAAAGTCTGGTGAATTCTGATAGGCCTGCCGTTATATGTTACTTGACCATTCTCCCTTACTGCTTATAATGT  
TCTATCTTTTTTLAGTGAATGTGTTTTCTGATTATTATGTGTTGGGAGGAATTTCTTTTCTGGTCAAGTCTATTTGGA  
GTTCTGTAGGCTTTTTTATGTTTCATGGACATCTTTCTTTAGGTTTGAAGGTTTTCTTCTATAAATTTTTGAAGA  
TATTTGCTGCCCTTAAAGTTGAAAATCTTCATTCTCATCAACTCCTATTATCTGTAGGTTTGGTCTTCTCATTGTGTC  
CTGTATTTCTGGATGTTTTGAGTTAGGATCCTTTTGCATTTTGCATTTTCTTTGATTGTTGTGCTGATGTTCTCTATG  
GAATCTTCTACACCTGACATTCTCTTCCATCACTTGTATTCTGTTGCTGATGCTTGCATCTATGGTTATATCTTTCC  
TAGGGTTTCTATCTCCAGCGTTGCCTCACTTTGGGTTTTCTTATTGTGTCTACTTCCATTTTTAGGTCTAGTATGGTT  
TTGTTCAATTTCCATCACCTGTTTGGTTGTGTTTTCTGTTTTCTTTAAGGACTTGTAACACTTTAGCAGTGTCTTCT  
GTATTTCTTTAAGTGAATTATTAAGTCCTTCTGATGTCTTCTACCATCTTCATGAGATATGCTTTTAAATCCGGGT  
CTAGCTTTTCCGTTTTGTTGGGGTGACATGACTAGGTGGAGTGGGAGTGCTGTGTTCTTGATTTCTGTAAGTACA  
ATTCTTACATTTGCCTTTGGCCATCTGGTAATCTCTGGAGCTAGTTGTTATAGTTTTCTCTGGTTAGAGCTTGTTCCT  
CAGGTGATTGTGTTAGCCTCTATCAGCAGACCTGGTAGACTACATCTCTCCTCTGAGTTTCAGTTGTCAGAGCACTC  
TCTGCAGGCAAGCTCTCCTCTCACGGGAAAGGTGCACAGATATATGGCCTAAAGACCTCCCTCCTGGCCGAAGAA  
GAAGGCCAAAACAGGACCTGTCTGAAGCTGAGTTGCTTTGGCCTGTCCAGAATGTGTTAGCTTCTGTATTCTA  
CACTCTCACACGTCCAGAATACTCTGTGGAGTCTGGAACCAAGATGTCTGCAGCTGATGCTCAGGCAAAGCAC  
TCCTGCACTGGGCAGACCCCTTTCTCTGGCTGGGAAAGTGGCCAGATGTCTGAAGCCTGTGCAGAATACTCTCGG  
CTGGGTCCAGGAACCAAGATATCTGCTGCCGCCGATGCTCCGTCAAAGCACTCCCGCACTGGTCAGACCCCTTTCC  
TCTGGCCTGGACATTTGCCAGTTGTCTGGGGCCGAAAAGTGGGCTGCCTTAGAAGCTCTGTGGCTCCACCTCTC  
CCAGAAGCTTTTGGCTTCTGTATTCCGTACTCTCACCTGTGCAGAATACACCCGGTGGGGTCTAGAACCAAGATG  
TCTGTTGCCGATGCTCAGGCAAAGCACTTCTGCACCCGGCGGACCCCTTTACTCTGGTTCCGAAAGTGGCCGGAT  
GTTTGGGGCCTTTGCAGAATACACTTGGCAGGGACCTGGACCAGTCTTGTGCTTCTCAGAAAATTGACATAGTAC

TACCAGAAGAACCAGCAACACTTCTCCTGGGCAAATACTCAGAAGATGTTCCGATGTGTAATAAGGATTCATTCTC  
TATGATGTTTCATACCAGCCTTATTTACTTATTTTGTAAATATTTTTTATTATTACGTATTTTCTCAATTACATTTAGAA  
TGTACATTTAGAAAAGTCCCCCATACCGTACCCCCACTTCCCTAACCACGCATTTCCATTTTTGTCTCTGGCATTCCC  
CTGTACTGTGGCATATAAAGTTTGCATGTCCAACGGGCCTCTCTTTCCAGTGATGGCCTACTAGGCCATCTTTTGAT  
ACATATGCAGTCAAGAGCTCCGGGGTCTGGTTAGTTCATAATGTTATTGGACCTACAGCATTGCAGATCTCTTTAG  
CTCCTTGGATACTTTCTCAAGCTCTTCCATTGAGAATCCTGTGCTCCATCCAATAGCTGACTTTGAGCATCTACTTAA  
GTATTTGCTATGCCCCAGCCTTGTCTCACAAGAGACAGCTATATCCGGGTCTTTTCAGCAAAAATCTTGCTAGTTTAT  
GCAACGGTTTTCATCGTTTGGAGGCTAATTATGGGATGGATCTCTGGACATGTCAGTCTCTAGATGGTCCATCCTTTT  
GTCTCAGCTCCAACTTTGTCTCTGTAACAGTCTGGCGTTTCTCAGAAAATTGGACATGGTACTACTAGAGGATC  
CCACAATACCTCTCCTGGGCATATATCCAGAAGATGTCCCAACCAGCAAGAAGGAATTTTGTCCACTATGTTTCATA  
ACAGCCTTATTTATAATAGCCAGAGGCTGGAAATAACTCAGATGCCCTCAACATTGGAATGGATACAAAAAATGT  
GGTACATTTACACAGTGGAGTACTACTCAGCTATTAATAAATGAATTTATGAAATTCCTAGGCAAGTGGATGGATG  
TGGAGGGCATCATCCTGAGTGAGGTAACACAATCACAAAAGAAGTCAAATGATATTTACACACTGATAAGTGGAT  
ATTAGCCCCGAACTTAGCATACCGAGATATAAGATACAATTTGCAAAACACATGAACTGAAGAATGAAGACC  
AAATTGTGGACACTTTGCCCTTCTTAGAATTGGAAGCAGTCACCAGCATTATTTATAATAGCCATTTGCTCGAAA  
AACTCAGATGTTGCTCAACAGAAGAATATATGATACAGAATGGATACAGAAATCTGGTACATTTAAACAATGGA  
GTACTATTCAGCAGTAAAAACAATGAACTTATGAATTTCTTAGGCAAAAGCATGTATCTGGAGGATATCATCCTG  
AGTATGGTAATCCAATCACAAAAGAACACATATGATATGTACTAATTATAAGCCGATATTAGCCCCAAACAGAC  
TACTCAAGATACAATTTGCAAAACGCATGAACTCGAGATGAAGGAAGACCAAGTGTGGATACTTCATTGGTTCT  
TATAATGGGGAAACAAAATACCCATGGAAGGAGTTACAGAGACATTTTGGAGGTGAGAAAAAGAAAGGACCATC  
CAGAGACTGCTCCACCTGGTGATGCATCCCATAGACAAACACCAAAACCAGACAATATTGCATATGCCAGCAAAT  
TTTTTGACAGGACACTGGAATAGCTATCTTTGTGAGGCTATGCCAGTTCCTGGCAAATACAGAATTGGATACTCA  
CAGTCATCTATTGGATGGTACACAAGGCCCTTAATGTGGAATCTAGAGAAAGTACCCAAGGAGCTAAAGGGTCTG  
CAAATTAAGGAGGATCAACATTATGAACTAACCCCTGAACTATGTATCTAGTTGCATATGTGGCAG  
AGGATGGCCTAGTCAGCCATCAAAGAGAGGAGAGTCACTTGGTCTTGTGAAGATAATATACCCAAGTACAGGGG  
AATGCCAGGGCCAGGAAGCAGGAGTGGGTGAGTTGGCAAGCAGGGTAGGGGAAGGTATAGGAACTTTCAGGA  
TAGCATTTGAAATGTAATGAAGAAAAATATCTAATAAAAATGAGTTAAAAATATTAGCAAAACCTTATATTAGC  
ACGTTAACAGCACATCCTAAAGATCTCAAACACAAAGAAGAAATGACACCCAAAAGATGTGGTGGCAGGAAATAG  
TAAACTCAGGGTGGAAAAAATAAAAATAGAAAGAAAAATACAAATAATTTTTGGAACAAATATTGGTTCTTTG  
ACAAGATCACTAAGATCAACAACTATTATTCAAGTAACTAAAATAAAAAAGATAATATCCAAATTAGCAAAATC  
AGATATTAATGGGGGGACATAACAACAGACACCTGATAGGTCAGAAAGTTTCGAAAAGTCTTCTTCTCCTAGAA  
AGCACACTTGCTCAACCATATTAATTGCTGCTGTATTATAATTATCTGCAACTGGAAACAACCTACATGTCCATAA  
ACTGAAGAATGTATAACATATATGTTATATTTATAACAATGGAACATTACTCAGCTGTTATGAAATGGATGGAAACA  
GAAAAAATAAAAAAAAAAAAAACAAAACATAAACCTGAATAACGTATCCAGTCCCAGGAAG  
ATAAATATGCTATGTGTTGATTTATATGTTGATATTGACTGGGCTGGATAGTTTTTTGTCAACTGTACAAAGTAA  
AGTCCCCTGAGAGTAGGGAATCTCAATTGAGAAAATGTCTCCATAAGATTGGTCTGTGCAGGCAGGACTGCAGGG  
CAGTTTCTTAATTAATGATTGATGGGTAGGATTTCTGCCAATTGTTGATACTGCCATCCATGTGCTTGTGGTTCTGA  
GTTCTCTATGAGAAAAGCATGAAACCATGGGGAACATAACCACTAAGCAGAATGCTGCAGACACTCTGGGCCCTTT  
GTCTGCGTGGAACGGATTTCTAGTCACAGGTGGCAAAGCGTTGGATGAAATGATAGACAGATACACAGAGGAG  
AGGTTGTGTAGAATCTGAATGTAATGTGTCAAATTGAGCATCAAACTTTTTATACAGAAGAGAATAGGAAAGTTG  
GGTGACACACAAGCAAGGTACAAAGAGGTTACTGGATTCTTACAGAAAACGGAGGAATACAAACTCAGAAGTTCT  
CACAGGAAACACCTGGGATAAAATTCAGTGTAAACAACCTGGGATCAAAAAGAGCTCCACCAATATCCACATAATC

TTAGAAGTCAGGGTCAAGGGATTCTGCGCCCTTGCTATAGTTCCTATTTTAGTCTATTGTATAGACCACCTTCCCCCT  
AGGCAATTGTAAATACGTGTATATGGGTGGAACCTCAGCTATCTATAGTTCCTAAGTATGTAAGTCTGCTTCCCTCCTTAG  
GTCTCAAACCTTCTTCTCCTAGATGATGATAAATCTTGTGTAGGGCAGTGAAGTCTTTTATTCAAAGTGGTAG  
TATAATACCAGAGGCAATTCTGAATGCCACTGAATAGACAACATTCTACTGAATTCTAAGCCCATGGTCAGCTCAA  
GGACTTTCTAGGATATTGGAACACTGGCAAAGCTTAGCTATATCAGAATCAATCTTAAAAAGAACTTATAATAA  
GATAACACTAAAAGAGAGCATGTGGATCCATACACCAGACTAACGCGGGAATAGGGGATGAGTATATGGGTAA  
TGAGAAGGCCAAAACCTCAGAAGGTGAGCTTCCGTGAAACTCTTTCCTCATGAGTGCTCCAGGCCTCTCGGCCT  
GTCAAGCTGACTCGACTGGTGTGCGTGGCAGCAGTACCCATCCATGGTCTCTGTATTAGCTCCTGCCTCTAGGTAC  
CTGGCCATTTAGTTCCTGTTCTGTCTGTCTTCAGATGATGAATAGCAATGAAGAAGTGTAAACCAAATAAGTCT  
ACCCTCCCAACTTGTGCTTGGGTTATAGTTTTGGTGACAGCAATACAAAGATTAACACATTCTACATTACATATG  
TGATGGCCTGTCTACAATCTGTAGATCCAGTGAAGTTAGGTATAGAGGAAGGACTTGGGTGCATACATTGATGCC  
CATGGTATGGGGATATAGAATGGATTTTATTAGTGGACAAAAGTGGACAAGAAAAGAGAAGATCAGGTGGCATAG  
TGGAGGGAGATGGGGTTGAATAAGGAAATGCAGGAAGAGATATTTGAAAGAGAAGTATTTGATGAATGATGACC  
GAAAGTGGAGGAACTGGAGATGATGGGAGGTAGTGAAGAACCGTGGGGAGTAAAATTTGGGGGGACTGTAA  
GCAGGGTATATTAATGAGAAATTAATATTTTTTAAATTTTACTAGAATATTAAGCATGGCAGAGGGTCTCCAG  
GAATGTACATTTTACCTCCAAAATACTGGGCTTTGATGGATTCTTGGTGAGGTGAACCACTAAAAGCTCTTACCAC  
TCATAAACACTTAAAAGCTGGTACCCTCTGTTACCCTCATGCTGTTGTAGAGTTTCTCTACTTGCTGCCCTCAC  
ATCACATCCCTCATAATTTATGGATTGTATGAAAATTTAAGGGGGTCCAGCCCCTCACTGGGCAATATCATTGCC  
ACCAACAGTGTTAGTTAGATCTAACTTTCTCAAGGATTGCAGCTGATGCAGATTAATACTTCAACCACGATCTTGGGA  
AAGAATTACTACGAAAAGCATGCCTTTTTTTTTTTTCAAAGTCAGGCTGGTGTTCAGATGATTATTATTTCTTTG  
TACCTATTTCTCCCTCTAATTCCTGATATGATTTAAGAAAAACATGGTTAATGAACAAATGTGCACCCTGAGGATT  
CAAAGTAGAAAGGGATGATAGTTTTTACATAAAAGTTTAGTTTTGTGATTCTTTAAGATTTTGAAGGATTAATT  
TTTGAGATAGATAAAAACTAATCCTTTATATATAACAGCAAATTTAGTCTACCAGTAAGAGAACTGTCTGAAAA  
AAATACCTTACTTGCTTACAACCTGTTAATCTATAACAAGTTTTTTAGTTAGAAATGTGTGTTGGTCTTGGGGATAA  
TATTGGATATTTATAAACATAATTTATAAATAGCTCATCATAAAAGTATAGTGAGAAGATTCTTTCTTATATATTC  
TCATAATTATTCACTAGAAGAAAATAGAAAAGTAGCCAGTATAAATTTTATACTAATTGAAAGATTGTGCAGAGATA  
TATAAGCAGTGTGAGAAAAATAAAGTTGGTGCTTTGTTCCATCCACCAATGTGAGTATATATGGAAAGTGGTTGA  
AGCTTGCCTGTCCAACAAATGTGTGTGTGTGTGTGTGATTGTTGTGCTTCTTAAAGCTTGTCTTCTTACCAT  
GTATGTAAATGTGTCTTGCCTGCTTTATATGCCATCTAACCAACATCCCCTCCTTGAATCATTGAACACTCTATCACA  
GCTACTCTTGGAAAGGCAAACAGACAGCAAACACACAGAACCCTACTGGGCATAACTTGAACATGTATGAGACCA  
CCCACCTCTTTCAGTGACACCCTCCTCCAACAAGGAAACACCTAGTCCAACAAGGTTACTCATCCGAATACAGCCT  
ATGGGCCGATGGGAACCAATTACATTAATACTACCACACCTACCTAGCTACATGCATACATATATTCATGCATAAG  
AGATAAACAGAGAAAGAGGGTGTGAGAGAAATAGAAAGAGAAAGAGTGAATGGTAGATGATAGAGAAATAGTTGC  
ATACATATCTATATAAATACATTCAATCATTACTTCATACATACATACATACATACATACATACATACATATAT  
AGATGATGGATAGACAGATAATGATATGTGTTATTAATCTAAACACTAAAGACATGGTGCCCTTAACTCACACAC  
ACACACCCTGAGCATTGTTTACAATCCTCAATTAAGACATAAAGGTTGGACATTCGAACTACAAAGACATATAAAA  
ACAAATCCACAAAACCTCACAATGTTTCAATTTGGTGTGCATAGATTTGATTAATATCTAGGATTTCTTTTTTGTGTATA  
TTATGAGAGATTACCCCTAAAATCTTCTCAAACCTGTCCATTATTTAGTTACTACCGTGTACAACCTGATACTTA  
TAATCCACTAGATAGTAACGTTACAGAAGGTATTTATTGTGCTGAAGATTTAGTGCATACCCCTCAGCTCCAAAAT  
ATATCTTTTAAAGACACATAGTAAGGAACGATCTTCCAAATGACCTGAAATGAAACTGTCACCTGGTGGAAAATAA  
CACAGCACAGGAAGAAGTTTACACATAAAATTTATTTTATTCATGTGAATATTGGTCAAATGATTACAATTGTAAAGT  
TGAATTACATAGTGGTATGTCTTTGAAACAATAGGAAAAATGATGTGCATACATTGTGCTTTCCAAAAGAGTAG

GAAATGTAAAACATTTAAGCAGTGGCATGTTGGTTTCTAATGCCAGGAGATGACTAACATAGCAACAGACTAATA  
ATGTATCCTCTTCAAAAGTTAAAAGAAAACAGCAACAACAAGAAGAGAACAACAATCACAAGGAACCATGTCATC  
CGTGGCATCTTCAGGAGGATGTGCAGCACTCTGAACATGGTTCCAAGGACTTTAGTAGATGTCTATTGCATTGTCA  
GCCTGACAAGTTTGTGTTCAACCATCCATGTCTGTATACTAAGGTTGGAACAATCCATCGGGGATGAGTGACCTA  
AAGATGATGAGTTCTACTCCCCACTCTCCTTGCTGCTCTGGAGACTTCAAACCTGAGGGGAGGAATGTTATATTGA  
TGAGTATGAGAATGCTCAAATCCTTTTTGTCTACATTGTGTAATGTGGCATCTTTTAAAGTGAAATGTAAGAACTG  
CTTGCCAGAAGGTACAACCAGAGGCCTGTTGAATAAAGATGCTACTATAGAGACCCCATGTAATGAGAAAGGTC  
TTTCTGAAGTACCCTTGGATAGAGGTGGAATTTAAGATCCAATTATTCAAAAATGGCATGTAGGCACTACTGTTGG  
CCTTATTGTCATACCGAGAACATCCCCAACACTAATCAGAGATGTATGGCTAGTGGTCAGAGGTGATTGGGTAATG  
GACATTGGGAAGAAGTGAGACCCTATGAGCCATTAATAATAGATAGGACCCCAATGGTCAGAGGGGAAATACAC  
GAGGGCATCTTTGTGAGAATTTGGAATCTAAAACCCCTTTGTACAGGTAATACTAGTATGTTTGGTTGGGTAGAGT  
TTAAATTTGCATGTTCTTTCTTGACGTGAGCTCAAAGACTCAGCCTACCTCATGCAGTGGAGCCATTCCAGGTAC  
TTCCTTACAGCTAGCAACTCCTCATCAGAGAATAGAGCATCTGTCCACTGTAGTAAATGTGGTGCCGGATCAGGAA  
GCAGTCTGAGCACTACCAAAAACCTGGCTGACAGTTCACACTAGTTCTTCTTCTCAGGCATATGTTCTTCTCCTG  
GGTCTAGGTATGAATCGTGAGGAGTACATCATTTTGTGTTTCTGCATTGAGGAAATGAGCTTTTGTGTTGGGCTGTA  
CTTCTTAATGTTCTGTCAGGTAATTTAAGCTTGGGTGGTCTGGAGGTCCATTTGGGAGTTAAAATTAGAGGAGGG  
GGTGACTAAGTGTCTCCATCAGAGGAGAACATTGCAAGGTCATTTTGTAGTCAGAAAAGCATATTTGATGACCACT  
GGGAAAATGAGATCTGAGGCCCTGGTAACTCAGAGTCAGTAGATTGAAAACCTTTTGGTCAAAGCAGAAGGAT  
CTGAGGCCCAATTAATAGACTTAGTAAGTTTACTCCACAGGGGCATATTTAGAATGTCTGAGAACCCTTTGGAT  
ATTGGTGGACGGTAGCTCTCTATTAGAACAGGGAGGGCTGGTAGATCTTTTGGTGAAAAGTGGAATATTTAGGT  
ATAGTCTAAAAGCAAATTCAGTTAAAAGACAGTAATTGGAATACTTTGGGCAAGGAGAGACATATGCAGTATCCC  
TATGTGCAGGAGAAGAATTGTTTCTCCCGTCTCAGGATTGGTGATAGATCTAAGATTCTCTAAAATAGGAGGATG  
GTTATAGGAGCTTCATAGGATTGTATAGAATAGTTTTATCCTGTTATTCTATGTCTGCAGCACTATTGATCAGAAA  
TTGAACACTGATTGATACCTTGAGAATTCTAGGACATTCCAGGTACTACTCCTTCATCAGCTCCAAACATGAAATC  
ACAATCAAGAATACACATCATCTGAATGTCAGTGGTAGGCATGACAACAATCTTAGAAGTCTTTTAAAGAGGGTGT  
ATGTAGTATTTTCTGGTTTGTGTTCTTCTTAAATATATGTCTATCCACACATTCTCTGCATGGAGGCCAGGATGTC  
TCTGTCTAAAGTAACAAAACAAAGATAGTAACTGATTTACCCTTACCTTGATACTCTTCTGTTTGGGATTTAGTCC  
AGAGTGTTAGAAAATCTTAGGTCAGAACAGTGCTTCCAGACCACGGAAATTAGAAGTTATAGGTAGGACATA  
CACTGGGAAGATGGAGAATCTGGGGGATTTCTCAAACACACTGTGCTCCACACAGGTTGGAGCACTCTCTGTTTT  
GAATGTCTAAATCTTCTAAAGGAAGATAGGGGAGGAGCTTGGGCAGTTTTGCACAGAAGTAGAATGGTTGTGCC  
CTTCATCAAAGAGGTAATGTGGCAAACCTTCATGAGAATAAGGAAGTTGAAGCATTCTGGTCATAAGCAGCATTCT  
GTGACACTTTGCAAGTGTGAAATCTAAACCTACTTGTAAAGAAGGGTAAAATCTCTGGCTATTTTCAATAAATAAG  
AAATACCATTTACATTGGTGAATAATGCAAATACATTCTGGAGAAGAGGGAGTCCCAGTGTTACTTGATTTGCTTA  
CAAATCTTTTTTGTAGAATTTAGGATATCCACATATTTTATGTAGTGTGTGGAAAGCAGGCAGCAATTGTTTCACT  
ATTACAGGTTGGATGGTTATCTTTGGTCTATGAAACCTTTAGTCAGATGACATAAGAGCAAGGCCACTTTTCTTGAA  
TGGAGGAATGTCTCTGAATATTTGTAACAGGAAGAAGTTTGGAAAGTAATCTTAGACAGTTGTAATATAGCAGGCA  
CACATAGTCAATAAGACAAGATCTATTTACACTTTACAAGAGAGTGTAGGTATGTGTCCACCACTGAAAAAAAAGG  
AAATATTTCACTCAAATATGGGCATTGAGAAAGGCTTTGTTGCCCAATAGACACAGGGAGAAGAGGAAATATTTA  
TGACTAGATGTGGTGTGTCTGAGGCTCCCATAGGGAGAGGGAGAGGCACTGAAGCCCTGGTATGACTGGATGAC  
ATTTATAGACCTCTTCGACAGAGGATGTGAATTTGAGAACCCTGGAACAAAAGAGTCATTCTGGTGCCCTTTT  
AAATGAGGAGTTGATGTGAGACACAGTTAAATGGAAATTTTTGCCCTCCATCAGATAGAGAATAGTTTGGAAATC  
TTTCTGATCAGAGAGGGTAATTTAAGACCTTTTGGACTGGAAGTGAAGTTTGTGGCCTGGGGCAGGTAGAGA

TGATCTCAGGCCTGTCAGGCTTACAAGACAGATATTGGACCCTCATGTATACAGAGGGTACATTTGATATATAATG  
GACACAAATTAGTGGTCTAAGTATTGATGTAGAAGATTAAGCAGAATTAGAGTCTGCTTAATGTCCCAACCTCT  
TTAGGGTTAAGGAAGTGACCTAGCCTACCTTAAGCAGGAGAGGTAGGACTGCTTCACAACTTAGAAGATTCCCAT  
CTTCACATACACCTTGGAAGCCTGGCAGCAATACAAGTATTATGCACCAGGCATGACTGTAAGTCTCTAAGCACT  
CTTGAAGCTTATCATCAGTTATATGGGTGTTTGCATGAAGGATGGTACAAAGGATAGATGACCTAAGTTTCAGGCT  
CTGTTAATGCAGGGCAGAATTAAGTGAAGTATAATTTTCTAGAGACCATCGTTGGAGGGAAATGATCTAAAGCTC  
ATGATTGGAGTGTTATATTTGAGGCTCATGTGTATGTAAGGATGCTCTTAGGATACCTGAATTTTGGTACCCTTGG  
GAAAAATGAAAATTCTGAGATTCCAATAGTAACTACAGTCATAATTATAACTGACCTTGGGCAGAAATGGAAGG  
TTTTGGGTATTGTTGGTAACAGCAGTAGGTCATGAAGACCACCTATCCCAAGTGAATTCTGATGACCCCTTCATCCA  
AAGGTGATGGTATGAGATACCTTGAAAACAGTTGAGTAGCATTTGTTTCATACCTACAACCTTCTATGACCTTCCGG  
ACCCATTTTCTTAAAAAGAAAGAACCTGGGGCTGGAGAGATGATTGAGTGGTTAAGAACAACCTGACGGCTCTCCCA  
GGGCTCCTGAGTTCACAAACATCTGTAATGGTATCCAGTGCCATCTTCTAATGTGCAGGCACACATGCATAGAGAA  
CACTGTGTATATAATAAATAACTAAATACTTAAAAAGAAAGGAACAAAAGAATGAAGGAAGGAAGGAAGGAAG  
GAAGGAAGGAAGGAAGGAAGGAAGGAAGGAAGGAAGGAAGGAAGGAAGGAAGGAAGGAAGGAAGGAAGGAAG  
AGGAGGGAAGGAAGGAAGGAAGGAAGGAAGGAAGGAAGGAAGGAAGGAAGGAAGGAAGGAAGGAAGGAAGGA  
GAAAGAAGGAGAGAAAGAGAATGAAGGAGTTAGAGAGAGAGAGAGAGAGATAGAAAGAAAGAGCCAGAAAG  
CAAGAGAGAGAGAAAAAGAAAGAAAGAAAGAAAGAAAGAAAGAAAGAAAGAAAGAAAGAAAGAAAGAAAGAA  
GATAGATAGAAAGAAAGAAAGAAAGAAAGGAAGGAGGGAGGGAAGAAAGTAAGAAAGAAAGAAAGTAAGAA  
AGAGAGAGAGAAACGAAAGAAAAAGAAAGAAAGGAAGGAAGGAAGGAAGGGAGAGAGAGAGAGAGAGAGAG  
AGAGAGAGAGAGAGAGAGAGAGAGAGAGAGAGAGAGAGAGAGAGAGAGAGAGAGAGAGAGAGAGAGAGAG  
GCCATGATTAACCAAGTAGCAGGATCAAGTCACCACATTGTGCAAAAGGGAAAAATCTAGTTTATCTTGGGTAGA  
GGGAGAACAGAATGGTAGTGCATAGTTTGCTCCATCTAGTCTCCCCACCTTCCATTATCCATATATTGTATATACT  
GTTGGGAAGAATACAAGGAACAATCAGCACACTCTCCAACAGGGAGAGTGGTTGTCTGACCTGAGGTTGTATTT  
GTCTGTACCTATCTATAACTGAGAGACAGGAACACACACCTTTCTGACACCTATCTCTAGGAAGATCACATGCATATT  
AGTTTTCTTTCTATGTTCTGCCCTCTGCCCTACACTCAGAAACATGTGAGAGCCCACTGAGAAGTTGCAATTGTGTT  
TGCCCTGCAATCTTTCTAATAGAGAGTGGCACTGAGGTAATATGAGTTTAAAGTCAAGTTTAAAGGTGCCCTTGAAAA  
GAATACTCTTGGGCATCCAAGAGGCTATATCTGAAACTCCTATGACTACAGGTATAATAAATGAGACCCTCTTGG  
ACATAGGATCCAACCTAAGATCTCTGTATCATTGCTCCATGACACATACTCCCTTGCAATCAATTAGATGTCTAT  
GTTCTTGAGGTTGAAGGAGGTAATTATAGCCCCCTTTTGTACTACAATGAACTGCATGTGAGTGGACATCATTCT  
ACTTTTTTTGTGGGAATGGCATAAAGCTTACTTAGTCTGGGGTATCTTTTTTTTATTAGATATTTTCTTTAATTACATT  
TCAAATATTATCTACTTTCTAGATTGCCCTTCTGAAAATTTCTATGCCTTCTCCCTCACCCCGCTCCCAACCTACCT  
ACTCCTGCTTCTGCCCCTGGCATTGCTTATAATGGGGAATAGAGCCTTACAGGACCAAGGTCCTCTCTTCCCAT  
TGATGAACTCCTAGGCCATCCTATGCTACACTGTGGTTAGAGCCACAAGTTCCACCATGTGTTTTCTTTGATTGGT  
GGCATAGTTCCAAGGAGCTCTGGGGGAGGGTACTAGTTAGTTTATGATGTTTCTTCTATGGGGCTTCAGTCC  
CCTTCATGTCCCTGGGTATTTCTCTGGCTCCTTCAATTGAGGACCTTATGCTCTGTCCAATGGATGACTGTGAGCATC  
CACTTTTGTATTTGGCAGGCAGTGGTTTGGGATATCTTTTGTCAAGAGAAATGACTGAGTCCCACATTCAACGA  
AACTGAAAGTTTGAAGGATTTTCTACTGAATGAGTACTTTAGACAATCTTGGGCAAATAGAGAAGGTCTGCAGGA  
GGCTTAGTCATAGGAGGAATGTCTGACATTCTTTCAGTGAAAAACAAAACAAAACAAAAGAACTGAGGTAACCTG  
GGAAGAGAGGAAGTACTGGGAACCTTAGGAGTAAGAGAAAATAATGAGACCTGGTTGGTACAATGGCATGCATTA  
GAAAAACCTTGGAGAGGGGGTAAGTGCCATGCAACATCCTGTTATGTATGAATGTCCCTTTTACCTTGATCAGTAA  
AGGAAGTCCCTCCACTGCTTTCAGCTTCCAAATCTTCTTAGTTGGTAAAAGTTCCACATCCTGTGTTTAGTCTGG  
GGGAGTTCAGATAACATTCCAAGCCTTTTCAAACAGCCTGGATGTCTGTCCCTGGCTAGGTTGCCACCTCAGTTTG

TCTTAATATGTACATATATAGGCAACAACAATTCAATTGGATTGCAAAGCATAACATAGGATCCAGTCAATACTTAT  
ATATATATATATATGACCTGGAACCACAAACCAGAGAAAAACAATATATTTCCCCTGTCATCCTTATAAAAGGGAA  
AGGCTTGAATCTTACTTAATTAGAGAATATACATTTGATATATTTCAAAGTCATAAGTGAATGCTTGAGGATACAA  
GGCACCATGCATTATTATTCAAAGAGCATATCTAATGGCATTTTATGAATAAAGAATAGTGTGACCTTCCTTTGGT  
CAAACACAGTGGTTAATGCCCCCTCTCTTGACAGAAATGGACAAGATCCAAGGCCATATTTGAGGGAAGGAAAA  
GACTGAACCTCACTCAGCCTCACCCAGGTTAGTTCTCTTGCTACTTCAAAAAACAAGGAGTGTGAGAGGAATCCT  
GGGAACATAGGAGTTATGAGAACCTCTTCTCAGAATGGTAAGTTCCAAGACCACCTTCAACAGAGAAACATGGAT  
TTTTCATGGACTAGATCAGATCTAGTAGGTAGGTCTAGGTCCTCAATGTTGAGAAGAATCACATAATACTCTCCATG  
AGGTGAAAATTATATAGCACATTCTTCTGGATACAATTGTGATCTAATCTTAATCAGAAAGGGGATTCTTGTCTGC  
TTTTAGTCACAGGGGCATAGATGAGGCTTCAATGTGCATCTGAGGCAGCTAGGAGTGGAAATTGTAAGTTTGATA  
GACAGTTGATGAAAAGAAAAAGTTCTAAATTCATGTTGTTGATAAGGGGCATAGAAAGGGAAAAATAGAGGGCA  
GCTTCTGTATCAAAAAAGAACTGAAAATGCCAGAGTAAGAGAGAGTAGGGCCAGGCCACCCTCTTGAGATGGAC  
TGCCTTACAGGTTCCGTTTGGCAGGCTGGGAAGCTCTGGTGTGTCCCTGGGCAGAAGGAGGAAGTCAGAAGCAA  
GGAGTAAGTCGTAAGCCTCCTAGAGCATTTTCGGTATCTCTTTTGCATAAAAAAGCACTGGTGAGGCCCAGTTTCTT  
AGATGGAGCATTGAGGGGCCACCTATTTGAGCCTGAAGCATTCTGAGCCTTTCTGAAACAGGGATCACAAAGCC  
AGTGTCCCTTTGGTGAGAACTGAAAAGTCTGAGTCCACATTGGTCTGATTGAGAAGTCCGACACCTCCTTTAGGG  
AAGAGGAAAGAACTACAACCTCCCTTTTGCAGTGCATCCTGTTGAGATTGATTTTCAAATGATGTGTATATTTGTG  
GCCTCCTAGGACAGAATGGTCACAAAGGGGGAACCCAAATTTATATTGTAATGATGGGTCTCTCCGAGGACAGGA  
GAGAGCAGGTACCACATCCTCTGCTTGAGATATTGTATGTTTGTGCATATCTTCGCATAACAGGGAATGTTCCAAAA  
GGGAATGTGGTACTCCCTTTTGGAGGTATGAATGCCCATAGGATAGGCACAAAAGCTATGGGCTCCCGTTTGGCA  
CTTCTGGAAGTTTTCTCTCCCTCTTGACATTAGGAATATGTTTTGAGTCCCTTAGTAGAAAAAGAATGGCTGAT  
ATCCTCTGGGATGATGATGAGTGTGCACACCTCTATGGGGACTGTCTCCATCTGGAGATGACTCAATGCATTCTT  
GATCTGTAGGGGAAGCTTGCAGGGCTCCTTGGGTAACAGAGGCTTTCCTCTGTTTTCTTGGTAGAAGTAGCGTG  
TCTGGGAATCTCATGAGGAAGGTGGGATGCCTGAGGCTGTCTCATGAGAAAGAGTGGTTCGCATGCACTCTTCT  
GTAAGGATGGAGGATGGCTTGCAACCTTATGCTCTGAATTGGAAGCTTTGGTGTCCATTGGTCTGAAGGGGCTT  
TTTCTGATGGGGTTTCACTAGACTTAGATGGTCTGTGAATGCCTTGGCTTGGTAGGGACTTCTGAGGCCACCTC  
ATGAGATGGTGAGCATCTGCAGGCTCCTTTAGCAGAATCAGATGTGGCGAAGTTTATGTTAGTCATAGTTTTAAGC  
TTTACAACCTTTCTTAAATTTGCAAACCTTACCCAAATTTTGGGAAGAATGGCAGTGTTCACCCGCATGTTTTG  
AGCGCACATATTTAGGCCCTCTTGATCTACAGAGGAAGGGCTTGGTCTTGTTCCTCAATTTAGAAGGTGTGGG  
GCAATTTCTGGAGGAGGAGAATGACTGAGACCTTTTTTACAAAGAATACTAGATCTGAAACTCAATTGAGATGAT  
TTTAAGGGGGAGATGCTCCTTTGAGGAGTAGAGGTAGGACTGGATTCTTTTCTGCATACTTGAAGATGTGAGG  
CTACTTACGGCAGAAGAGATAACATTTAAGGCATCAAGTTCTGAAAGGCAGTATCTGATATCCCTTTAGGAATTG  
GGACATGTTTCAATATCCTTTGGTTAGATTTCAAACGTCTAGGGTCTTTTTGAGATAAGAGAAATTTCTCCATCCAT  
CTTCATGAGGAGGGGTAGGCATAATGTCCCTTCTGCACAAAGGGACAGTCCCTGAAACTCTGTTGAAAAGGAAG  
TATCCACGTTTTCTGGTGAGATGTCACAGTTTTAGAGGCCCTGAGCAGGTTGAGAAAGTTCTAGACTTTCCTG  
GGGAAATGCTGGTGTCTCAGGATCCCTTGTTCAGATACTAAAGGGCCAGAGCACCTTATTGGGTTTCAAAAA  
CACAGAGACCCTAACACAGATGCCAAAGCTTCTGGAGTCCCTGGCACAGATTTTGAACCTTAGAAATGGATTGTG  
TATATGTCAGAGTTCTTCTGTCTCTGGACTAAGTGGTGAAGGAAGTGGTAATTTGGGAGAATCTTGTGTGGCTGA  
CAAAGATTCTATGACCTCTTGGGTGACAGATGGTATTTCTGTACTATTTGCATACATGCCCATATTTCTAGTGTGC  
CTGGGAAGAATCAGAAAGTCCAAGATCTTCAGGATTGGATGGTAAATATCCTAAAGCCTCCTTTTCAACCCAGTGT  
CCTGGAGGCTCTTGGGTAACAAGGAAGTTTCTGTAAGCCCTTGGGAAGATATTGATGTTTCTAGTACACCTTGGG  
CAGACATGGAAGGTCTCCAAGACATTAAGACAGAATGTTACTCTTTCAAATCCAATTGGACAGATGGAGAAGGTC

CTAGACTCACTATGGTAGATGCTGAAATTTCCAAAGCTCGTGATGAAGCATTGGATATTCTGGATTGCCATGTGT  
ACAGGTACAAACTTCCAGGTTCCCCTATAAAGACAGCCAAGGGCCTCCAGCTTCTTGAACAGATAACAAATGGCCT  
GGATTCCCTTGAGCAGATAGGGACAATGTCAAAGGCTCTAGGGCAGATGATATAGATCCTAGTGTTCTCGATCA  
GATAAAGAAATTACCATGGGTCCTTTGGAAGAATGCATAGATCCTGAAGGATCTGAAGTAGATGGATCTGTTTGT  
GAACCCCTTGAGAGAATTCAAAGACTCATTGGTCCCTGGAATGAAGTTAAAGGTCCCTCTGTAGGTTTAGAGAG  
GTCTAAAGGCTCTTCTGTGGAAAGGGAAGATCCAAAAGGCTTAGGGAAGAAAGTGAGGAACTAGGTTGGGCAGA  
AATTGCAAGTTCCAGAGGTGAGTCATTGGATATCATATGTCCTGGGGTAGCTGTTGAAAATTTTTGTGCTCCTCAT  
GCAAATGATGAATATCCTAGAGCCCCCTGGGGAGGCAGCAATGTTTCTACAGAGCCTGTGTATTTGCTGAAATCCT  
CAGAGATCCCTGGTCAGATCTCAAATCCTTGCTGTATTTGAGCAGGGTGGTTATATCCCTGACACACTGGTAAA  
GATGGTGAGTCTGCTACTGTGTAGTGTGTAGATGTGGAGTGAGTTCCTATACCTTGTGTATGTAAAGAAGGACTTG  
AAAACCTTATGGAAGATGTAGAATGTTGGGTAGACCTTTGTGGACATGTGGACAGATGTATGGTCCCCTTGTGCA  
GAGACTGGGACTCACACCTCCTTGAGCAGAATCAGAAGATCCTGGAGTCCTTTGTTCTGAGGATGAAAGACCCAG  
AGGATTATGAGAACATTCATAGCATTGTGATGTATTCATCATTGCCTGGGCTGAGATAGAATGTTTCAGAGGCCCC  
TGGGCAGATTGCAAAGTGCTAGATACCCTTGACCAAATGGGAAAGTCTTTCACCTCCTTGGTCAGAACAGGAA  
TGTCTACCAGGTGTTGGCGATGATGGTGGCAATGTTCTAGATTTGCTGAAGTAGACTGAGAAGATGCTACAGCC  
TGCCTCACTTGTGGAAAAAGGCCTATAGCACTGTGTGACTTTCATATTGTGCAAATATCCCTGTGGCATCTGTTGA  
ATTTTCTCGATTTCTTTGTTTGGGGAAAAAGAAGTTGCATGAGCAAAGTTCCTCTTGTGCCCTGGAAAAATTTCTT  
GTGCTTTTAAAAGATGACAAAGCTTCTAGAAGCTTGGAGTAGATAACAAGATGCTCCTGAACACCCAGTACTGAT  
GGTGTAGGATAAAAAGTTTTCTGAGATTTCTGGCTAAGTAGGAAAAGTTCGAGTGTCCCTGGGAAACCTGGGGAT  
CTTTGTGCAAATGATGGGCAGTTGGAGAAAATCCTATTTCTGTCTGACAAGAAGTTGGAGGATGCAAAGTATCTT  
GAGCAAATGAAACACTTTGTGTATTTCCCTGTTTTAAAATTGGGCTTTTAGATACCCTTGGGAAAAACAGAAATGTC  
CGAAAGCCTTGGAAAGATGAAGAAGCTAGGGTTCCTGTGAAGATAAACAATCCAGAGACATCTGCTCAG  
ATGACACAGATTCTGGTCGCACCTGAGTATTTGGGTAGACCCAGATGTCCTGGAGTGGGAAGCAAAGCTCCCA  
CAGTCTCCTTGCAGACAGGGACTTTCCTACTGTGGCTTCTGCAGATAAAAAATCCCTCAGTGCCTGAGCAGA  
TGTGGAAGACCCTAGAGTTGTTTCTTAGATTTAGTCACTTCTAGATGGCATTATTCAGTTGAACAAAAGTCTAGAG  
TTCCTTGCTCAGATCTCAATAATGATGGTGACAAGTGTAGTGATGTAGTAAGATCCAGGAGCAGTCCAGCACATCT  
GAAAGTGTCTGAAGTCCCTGGGTAGATGGAGAACATTCATTTGTTTCTGAAACTGTTGGGGAAGGAGTTGAATG  
CAGTAGAGCCCCTCAGCATATCCAGAATATGGGTCATTGCCTGGGCTGAGCTTGAAAGTGTGAGAGGCCCTGG  
GCTGACTGCAAATGTGCTAGGGTCCAGGACCAGATGGGAATGTTTCTGCACCTCCTTGTGAAAAGATGAATGT  
GTACCAGGTCTCGAGGTGATGGTGGCAAAGTCTAGAGTAGACAAAGCAGATGTAGAAGATTCTGTATTCTCC  
CTCACTAGAGGCAAAGGGCCTGAGGTAGTCTGTGTGTGATTACATTGCCCAAGCCCAATATCCCTGAGGAATCTG  
CCGAAGTTCTATTTTCTTCGGGTGGATGACAAAGAAGTCTAGCACAGGCAAAGTCCCTCTGCAGCTGTGAAAAA  
GTCCTTACACTTTTGTAGAGGTTAGCACATATCCTTGAGAGTCTTTACTACATAGAGGATGCTCCTGAGAACCTAGTA  
CAGATGGTGAATGTGTTACATATGCTTGTGAATATGGAATGGATTTTTGAGATTTCTGGCTAGGTAGTAATGTCCC  
AAAGTCCCTTGTAGGAAAGTTGGGATCTTTGTCTAGAATGTTGAGAAGGGGGAGAAAATCTCATACTTTTCTGGCA  
ATAAGTTGGATGTTGCACAGTCTTTGGAGAAAATGGCACATTTTTTACACTCCCTTGTAGTTGTGGGCAGTTTTA  
GAGACCCTTGGTCAGAAAAGGAATTTCCAGAAGCCTCTATGGAAGATGAAGAGCTTAGAGTTCCTGGTAAAGAGG  
AAGAAATCCAGAGGCTTCTGATCAGATGGAAAAGACTCTGAGACCACCCGAGTGATTTGGGTGGACCCATAAG  
GTCCTGGAGTGGGAGGCAAAGTCCCAATGTCTACCTGACAGATGGACTTTCCTGCTTTGGCTGTGCCAATAA  
GGAATGACCCCTAGTGCCCTGAGCAGATGCATAAAAACCTACAGTTGTTTCTTAGATTTAGTCCCTCAGGTATGC  
AAGGTCTAGAGATCCTTGTCTCAGATCTCAAAGATGATGGTGACACCTGTAATAATGTAGTATGATCCAGGTGCAG  
TTCAGCACATCTGGAAGTGTCTGAAGTCCCTCAGGTAGAAGGAGAATATTCATTTGTTTCTGAAACTGCTGGGGAA



GGAAGTGAATGCAGTAGAGCCCCTTCAGCAGATACAGAGATATGAGTCATTGCCTGGGCTGAGATGGAATGTGTC  
AGAGGCCCTGGGATGATTGCAAATGTGCTAGGTTCCCGGGACTAGATGGGAATGTTTCTGCACCTCCTTGAGTA  
AAAGATGAATGTGTACCAGGTTCTCGAGGTGATGGTGGCAAAGGTCCTAGAGTAGACAAAGCAGATGTAGAAGA  
TTCTGTATTCTCCCTACTAGAGGCAAAGGGCCCGAGGTAGTCTCTGTGTGATTACATTGCCCAAGCCCAATATCC  
CTGAGGAATCTGCCGAAGGTTCTATTTTCTTCGGGTGGATGACAAAGAACTTAGCACAGACAAAGTCCCCTCTGC  
AGCTGTGGAAAAGTCCTTACACTTTTGGAGAGGTTAGCACATATCCTTGAGAGTCTTTACTACATAGAGGATACTCCT  
GAGAACCTAGTACAGATGGTGAATGTGTTACATATGCTTGTGAATATGGAATGGATTTTTGAGATTTCTGGCTAGG  
TAGTAATGTCCCAAAGTCCCTTGAGAAAATTTGGGATCTTTGTCTAGAATGTTGAGAAGGGGGAGAAAATCTCATA  
CCTTTCTGGCAATAAGTTGGATGTTGCACAGTCTTTGGAGAAAATGGCACAGTTTTTACTCTCCCTTGCTTAGTTGT  
GGACAGTTTTAGAGACCTTGGTCAGAAAGGGAATTTCCAGAAGCCTCTATGGAAGATGAAGAGCTTAGAGTTCCT  
GGTAAAGAGGAAGAAATTTCCAGAGGCTTCTGATCAGATGGAAAAGACTCTGAGACCACCGAGTGATTTGGGT  
GGACCTAAAGTCTGGAGTGGGAGGCAAAGTTCCTACTGTCTACCTTGACAGACATGGACTTTCCTGCTTTGGCT  
TGTGCCAATAAGGAATGACCCCTAGTGCCTGAGCAGATGCATAAAACCCTACAGTTGTTTCTTAGATTTAGTCCC  
TTCAGGTATGCAAGTCCAGAGATCCTTGCTCAGATCTCAAAGATGATGGTGAACCTGTAATAATGTAGTATGA  
TCCAGGTGCAGTTCAGCACATCTGGAAGTGTCTGAAGTCCCTCAGGTAGAAGGAGAATATTCATTTGTTTCTGAAA  
CTGCTGGGGAAGGAGCTGAATGCAGTAGAGCCCCTTCAGCAGATACAGAGATATGAGTCATTGCCTGGGCTGAG  
ATGGAATGTGTGACAGAGCCCCTGGGATGATTCAAATGTGCTAGGTTCCCGGGACTAGATGGGAATGTTTCTGCA  
CCTCCTTGAGTAAAAGATGAATGTGTACCAGGTTCTCGAGGTGATGGTGGCAAAGGTCCAAGAGTAGGAAAAGA  
ATATGTAGAAGATTCAGTATTCTCCCTACTAGAGGCAAAGGGCCCGAGGTAGTCTCTGTGTGTTTACATTGTCCC  
ATGACCAATATCCCTGTGGAATCTACGGAAGGTTCTAGATTCATTCGTGTGGATGACAAAGAACTTTGCACAGGCA  
AAATCCCCTCTGCAGCTGTGGAAAAGTCCCTTACACTTTTGGAGAGGATAGCACATATCCTTGAGAGTTTTTACTAGAT  
AGAGAATGCTCCTGAGATCCTAGTACAGATGGTGAAGTGTTCATCTGCTGGTGAATATGAAAAGGATTTTTGAG  
ATTTCTGGCTAGGTAGTAACGGCCCAATATCCCTTGAGGAAGCTGGGGATCTTTGTCCAGAAGGTTGAGAAAAGG  
GAGAAAATCTCATACTTTCTGGCAATAAGTTGGATGTTGCACAGTCTTTGGAGAAGACGGCACAGTTTGTACACT  
CCCTTGCTAGTTGTGGACAGATTTAAAGACGCTTGGTCAGAAAGGCAATGTCCAGAAGGCTCTATGGAAGAAGA  
AGAGCCTAGAGTTCCTGGTGAAGAGGAAGAAATTTCCAGAGGCTTCTGATCAGATCCGAGTGATTTGGGTAGACC  
CTAAAGGTCTGGAGTGGGAGGCAAAGTCCACAGACTGCTTTGCAGACATTGGCTTTTCTACTGTGTCTTGTGC  
AGATAAGGAATGCCCCCTAGTACCCTGAGCAGATGCAGAAAACCCTACAGTTGTTTCTTAGATTTAGTTGCTTTA  
GATGAGAAAGGTCCCACAGTTCCTTGCTCAGATCTCAAAGATGATGGGGACACCTCTAGTGATGTAGTAAGATTC  
AGGTGCAATCCAGCATATCTGGGAGTGTCTGAAGTCCCTTGGGTAGATGGAGCAAAAAATACAGCAACTCATTCA  
TCATCTTACTTTGTGCTTGCAGGCTGGTTGCAATTATCTTGTAAAGCATTAAAAATCAGTCTAACATACTGCCTATGT  
TCCATAGGGTTTTATTGATGTGAGGAGACATCATGACTCAGGCAACTCTTATAAGGAAAATTTAAATGATGTTGTC  
TTACAGTTTACAGAGGTCAGTACATTATTATCTTTGTAGGAAGCATGGCAGCACCCCGGTAGAAGAGGTCCTGGA  
GAAGGAACTAAGTGGTCTATATCTTAGTCTGAAGGCTACCAGAAGGAAGCTTGTGGCCACAGGTAGCAAGGAAG  
AGGATTGATTTTTGTCTCTGAGCAGAGATTGAGCACTACACAAAAGCAAGCCTACACAATGATACACTTCTCTAA  
CAAGCCAACACCTTGAATAATGCCACATACTATGGGCAAAGATATTCTAATGAACACATTGCGTCATAGGACAT  
AAAGAAAGATACTGCATGATTGCATTCTCTAGTACAGGTGCGACATACCTACAAGCTTATATGAACACACACAC  
ACACACACACACACACACACCAATCAGATATGCACGTGCATACATATATATTTGTCTATTTATTTACTTACTTA  
CTTACTTACTTACTTACTTACTTACTTACTTACTTACTTACTTACTTACTTACTTACTTACTTACTTACTTACTTACTT  
TACACATAAATGAGTTTTAGCAAATTCATCCCTATCTTCTCCTCCTTGAATTGTTACCCATTTCTCCTGTATCACTTTT  
ATCCTTAATTACATTTTATATAGACGGCTGTGTAGTGCCATGCCCTGAGCAATCGCGTGCATGCCGCAAG  
CAATCACTGAGAAGAGCAGTGCATGCCACAAGCAATCGCCATTATAAGATGGTGTGGCCTCCCCTGTGCCTAACT



GCTTACAATTTATGCACAGCTACAGTTTTAGAGAATCACTGCTCTCTTTTAGCCTCTGTAGGCTATAGAGGCATAAG  
TGAGAGAGAGGGCATGAGCAGACTAGCACAGAAGTGAGAGAGGGCATAGCACATAGGTGAGAGAGAGTTCCTG  
AGCACTCTAGCACATAAGGGAGAAAAAGGGGCTGGGCATCCAAGCACATAAGTGAGGGGAGAGAGGGCCTGCAC  
ATCCTAGCACACTCTTGTAAATCAAGCTCAGTACTAGGAAGGTTGAGGTGGGAGTTTACCAGGGATTGTAGGGAAT  
CTGGATGTTCTCTTCTGATCTATTAGGACAGCATGGACTCTTCTGTTGTGGGTATGTACATACAGAAAAAGTACACA  
CATTTTAATTTTTATGCACATAAAATAAATAACAAAAATTATTACAGTTGAAATTAGCAGTGCCATTTCCAGTACTTTC  
ATGTTACACATTTGTTTCATGTTTTTTCAATTCTGCAAATGCTTATCAACCTAGAAACTGGAAATCATTTGTCTTAAAG  
ATGGTAGCTCATTTCCACCTCTGAGACCTCCCTTCTAATCAATGGTGCCTGGTACTCCATGACAGCATACACAGGG  
TATATTCAGCCAAAGGGTGAAATCCCTGGATGAGACCTGTTTTCTATATCTGGCATCACAAAGGGTCTCAGAGAC  
ATGTGGGTCTCTCTGATAACGTTTTATTTATTTGTTTGTGTTGTTGTTGTTGTTTTGTTTTATTTTTGTTATT  
GTTTTGTTTTTATTTGTTTTATTTTTGTTTTGTTTTGTTTTGTTTTGTTTTGTTTTGTTTTGTTTTGTTTTGTTTT  
TCCCATTGAGCAGACAAGCAAGGAAAGGTGCGGTTGTGAAGGAGTTCACTTCTGAATGACCTGGAAGAGATAACC  
AGCTCTGATCAGGGTATTGGACTGTTAAAGGATGTGTGACTGGAGGAAATCTCAGTCGCAAGAGGCCACTATG  
TGAGGAAAAACCTCCCGATCTGCATTTCCAAGGCTTCTGAGGGTAAATGAAGGAGGAAGATCATATTTATTTATT  
TTTTCTTTTTTTTTAACTAAGAAGACATTATAGTTTTAAAGAGAAGAATGGCTCTTAAGAAAATAATGGTGATTCC  
AAAGAAAGATTACTTATTACTTTTTGGACTTTGATGATGAAGAAGATGACATAAATATTTCCGAGGAGTCTCTTCT  
GAAGGTTACTGCATATTCAGTGTTGGGTATTAATTGTGTGTTGTGCAGTTCCTAGACTTTTACCTAGTCACCTGAA  
ATGGAAGAAGTCTTTTCTCAGAGATTTTATATAGTTCATTTGAAATTTTACCTATCTATCTATATCTATATTTCTAT  
ACCCGAGTTTTAGCAACACATATAACTACTCTTGACATTGTAGTCAGAATATGTTGATAAAAAATAACTTGTTATGA  
TTTTGCCACCGGAAAATACCTGAACATTGTTCCAATAATATGTTTGCAAACTTGAATTTATTTCAAGAACATTACA  
AATAATTTATTTCACTTTTTTTTTTATTATTTATTTCTTTTTTTCTTTTTTTTACATTTCAAATGTTATTCCCTTTCT  
GTTTTCCCCTCAAAAATCCAGTCTCTCCCCTCTATCCCTGCTTCCAACACACCTACTCCCAATTCCTGGCCAG  
GCATTTCCAAAACCTTGGTCATAGGAACTTTACAAGAACAAGTGTCTCTCCTCCCATTGATGACATACTAGTCCATCC  
TCTGCTACATATGCAGCTGTAGGCATAAGTCAACAATTATGTTTACTTTGATTGGAGATTTAATCTCAGGGAACTCT  
GGGAGTACTTGTTAGTTGTTTTTCTCATAGAATGTTCTTGTGTACTTTCTCTAGCTCCATAATTAGGGACCCCGT  
CTCAGTCCAATGGATTTCTTTGAGCATCCACTTCTGTATTTGTCAGGAAATGGCAGATCGTCTCAGGAGACA  
ACTATATCAGTCTCCTGTCCCTAAGCTCTTGTGGCTGTTCAACAGTATCTGGGTTTGGTGGTTGTTTATGGTATGGATCA  
CAGAATGAAGCAGTGTCTGGATTCTCAGTCTTAGTTCAAAATTTTTCTCTGTA  
ACTCTTTCCATGGATCTTTTGT  
TCCCAATTCTAAGAAGGAACGACATATCCACACTTTGGTCTTCTTCTTGTGAGTTTTCATGGGTTTTGCAAATTTTA  
CCTGTTTTTTTTCTGAGCTTCAAGGATAATATCCACTTATCAGTGAGTATATATCATGTGCTTTCTTTTGTGATTGAG  
TTATCTCACTTAGGAACATATCATCCAGATCCATCCATTTGTCTAAGAATTCATGAATTCATTGATTTAATAGTGA  
TGTAGTATTTCAATTATGTAATGTACTATATTTTCTGTATTCACTCTCTGAAGACAGGCATCAGGTTTATTTTCAGC  
TTCTTGCTATTATAAATAAGTTTGCTATGAACATAGTGATGCATGTATCCTTATTACAAGTTGGAATATCTTCTGGAT  
ATATGCCAAGGAGGACTATTGCTGGATCTTCAGTAGAACTATTACCACTTTTCCGAGGAAACCCCATCTGCTTTCCA  
GAGTGGTAGTACCAACTTGAATTCACAAGCAATGGAGGAGTGTTCCTACTTCATCACATAACCCACCAGCAACTA  
TTGTCATCTGAGTTTTAGATCTTAGCCATTCTGACTCTGTGAGGTGGAATCTTAGGGTTATTTTACTTTCTGTTCCC  
TGATGATTAAGGATTTTGAACATTTATGAGGTGCTTCTCAGCCATTCAGTGTTCCTTAATTTAGAATTCTTTGTTT  
AACCCTCCCATTTTTTAAATAGTGTATCTGATTTTCTGGAATCCAGCTTCTTGTGATATATTGAATAT  
TAGTCCCTTATCTGATTTAGCATTGATAAAGACTTTTTCCCGATTTGTTCTAATGATAGTGCCCTTGCCTTACAGA  
AGTTTTGCAATTTTTGAGGTCCCATTTGTCTATTTTTAATCTTATAATAACAGCCATTGCTGTTTTGTTTCAGGAATATT  
CCCCATTTAACCTTGTCTTCGAGGCTCTCCACACTTTCTCCTCTATAAGTTTCAGTGTCTCTGGTTTTATGTGCAGTT  
CCTTGATCCAATTAGACTTGAGCATTGTACAAGGAGATGAGAACAGATCAATTTGCTTCTCAATATGCTAACTGC

CAGTTGAGCCAGCACCATTTTTGAAAATGCCATTTCTTTCCACTGGGTGGTTTTATCTCCTTTGTAAAAGATCAAG  
TGACAACATGAGTTTGGGTTCAATTTCTCTGTCTTCAGTTCTGTTCCATTTATCTACCTGTCTAACACTATTCCTGTACC  
ATGAAGTTTTATCATAATTGCTCTGTAGTACAGCTTGAGGTCAGGCATGGTGATTACAAAAGACATTCTTCTATTG  
TTGAGTATAGTTTTGGATATAGTAGGTTTTTTTTTTTTCAAGATGAATTTGCAAATGGCCCTTTCTAACTCAGTGAA  
GAAATGAGTTGGAGTTTTGATGGTGATTGCAATGCATATCAGATTGCTTTTTGAAAGATAGCCATTTTTACTATATT  
AATCCTGCCAAATCATTAGCATGGGAGATTTACCATCTTCAGAGATCTTCTTTGATTTCTTCTTGAAGAATCTTGA  
AGTGTATATCATAATATATTTCACTTTCTCAGAGTCACACCAAGGAATTTATATTATTTGTGACTACTATGAAGCA  
CGTTTTTCTTAATTTCTTCTCATACTATGTGTCTTTCTGCAGAGAAAATCCACTGTTATGTTTAAATTTATTCTAAA  
TTCAGCTCCTAAGCTGAAAATGTGTATCAGGATTAGGTTTTCTCTGTTGTAATTTTTGGGGTCATATATACATGCTA  
TCATATCTTCTGGAAATAGAGAAAATTTGACTTCTTCTTCCAAATTTGATTTCATCTGTTTTCGTTTTGTTTTGTTTTG  
TTTTGTTTTGTTTTGTTGTTGTTGTTTTGTTTTGTTTTGTTTTGTTTTGTTTTGTTTTGTTTTGTTAATTGCTCTG  
GCTAGTATTTCAAGTATTCTATTAATAGGTAGGGAGAAAGTGGGCAGCCTTGCCAGTCCCAGATTTTAGTTGGA  
TTCCTTCTGGTTTCTGACCATTTAGATTAAGTTAAATCCTGGGCCGTCTTTCTTTCTTTTTTTTTCTTTCTTTCTT  
CTCCTTCTTTTTATTTTTTTTTAGGTGTATGCCTTGAATTCCTGGTCTTTCCTGGACTTATTATGAATGGCCATTGTA  
TTTATCCAATTTGCTCAGCATCTAATCGAATAATCATGGGGTTTTGTACTTGAGTTTTTTTTGTTTTGTTTTGTT  
TTTGTTTTTTTTTCTATAATGGATTAATTGATGGATTTTCGATATTAAGTCTCCCTGAATCATAAGAAGGAGGCCA  
ACTAGGTCATGATTGTTTATCCTTTGATATATTCTCGGACGCGTTTTGAAAGGATTTATTTAGTATTTTTGCATCG  
ATATTCATAATGGAAATTGGAATAAAGTTTCTTTCTTATTAGTTTTGTATAGTTGTAATCTTGCTTCATAGAACA  
TATTAATAGTGTTCTTCTCTTTTAATTTGCATAATAGTTTGAGGAGTATTGGTATTAGGTCTCCATGAATATCTG  
ATAGAATTCTGAACTAAACCCATCAGACCCTGGGCTTATTTTTGGTTGGGAGACTATTAACGATTGCTTCTAATTCT  
TTAGGGGTGTTATGACCCACACTACAGTCTTGCCAGAAAGAATGCCACAGGACACTGGGATCCTTCTGCAGTAAA  
GCTTTAATGCATCTCGAGAGATAGATGATCAGCTTCAGGACAGGAGACCCAGAGAGCAGAAAACCCCTCCCTTAT  
ATAGGCTGTGAAGACAGTTAGAAGTATGGTTGGAGACGTGCACCACCGGAATTGCTGCCACCATCAGCCTGAT  
GATGCCATTGGAGAGACAGGGCTCAGGTAATGGAAAGATACCCCGATGCCTGTGCACACTCACCACGAGCAATAG  
TGACAATGGTGTGTGAGCACCATCTTGAATGGTGGCCGTGAGGACGGCTCCTCACATCTCACCTTTTTTTTTATG  
TTAGAAGCAACAGGCCACACAGTATGGAGAGTGGAGATAGAGTCAAATTCGAGTGTGCAAGCATAGGGGCCT  
TACACAAAACCTCCTCCCAGGCTCGTCACCCAGAGGGGTCTTGGTCAGCTCCCCTGTCGTTTTCTGGGGGAAGG  
ACACTAGGACACTCAACCTTCTTGAAGATGACATATCTCCAGAAAGAAGCTCAAATTAGACCACAACGCCATTC  
CAGTGCAGTGCTTCGCCCCAAAATCTCCTGGGCTGTTAAAGCACACCCGCTCCAACCCATGCAGCAAGACTCGCC  
TCAGGGTTTTGTGGAGCTGGATGTCCAGCAACCTTATTGCTTGAGCATCATCGATATTCATATATTGGGGGAAACA  
CCCTGCTCAAAGCAACAAGTGCTGGGTTACTACCATCCTGTCCCTCCTTGTGGGATTTAAGTTTGCAGATCAT  
CCATAGTAGGAGCAGTACTCCACTGTACACAGCCACTCAAACAACCCACCCCCACCCATTGCTTGAAGTAGGAGA  
ATGCTGCAGAAATCCAGGTAGAAAATCCTTCCATCAATGACAGGTCAAGACATGTTGAATCGACTTATAAGATGGT  
GATCCTCAGCTCCCGAGTGTCTGTTCAAATCTATGGTCCAATTCTGTAACAAATAACAAGACAAAGCCTTTTACA  
GGTTAGCTGCTCTTGTAAAATTCTGAAATTGTAGTAAGGTGATACAGACGCTAGGCAGCTTATGTTTGCAACCCAG  
CTGAGGCATTTGCCAAAGAATATACACCTGCTCTTGGACCAGATCGATCCGTTGGTTTACCAACATGAGGCCTCTCT  
GTATCTGGGAGTTGGCCATGGTCTGGCTGTTGAGGGCCAATGTCACTCTTGCCGAAAGGTCATTTTATAGTTTGCG  
TTGTCTGAACCGTAGCAGACAAGGCAAGGGCCGAAACAGTGACAGAGGCAGCTATTGCTGCTATTGCTACCAAGC  
CAACTATAATAGCAGAGATTCCAAAATCTCTTTTTCTCTAAATAAGCTTAAATTCTAGAGGCTTCCACAGGAACTG  
GAACAAATCTAGGCACATGAGTAACCAAAGCAAAGGGATACTTAGTAGCATCCCAACACAGGGTATAGAACTTT  
AATTAAGCAAGCAATCTAACTCTAATTGATTATTATTTAACTTTTATTACTTACCACCCACAGAAAGGGGGCCAAA  
CACAAACCGGGGTGACAGTATAATTCACCCTTTAAATGCTTTATATTTAGTATTAGAGGAGGAGTGATCGAATGA

CCCCAAACCAGCACTCAAAGTGCCCTACCACTCAAACCCATTTGGCCCTTTTCACTATATCCACCTTCAATCATGGC  
CATAGGTGAAAGATCGGTACAGCTCTCATTAAACCCACAAAGTAACCATTGATCAAAGGGTTAGCATCTGCCCGA  
TCAGGATCCATGAAGTTAAAATCATGTCCAGCAAGGATTTTCAATCTCTACACTTACATGTGGGGAAAAGGAAA  
AAAAAATCCTTCAACCACCCAAAGGGTTTTCTAGCCTGGCACCCAGTCCAAGGAAGCATGGAGTCTCCGAGGAT  
CTTCCTTACAAAAGGGTGCCATTCTGGGTTGCTGGGGCAGTGCTTCTGGATTTATGACTAGGCCTCCAGCCTTG  
GATTATCAAGGCATTGGCTATTATTTAGAGTGGGTTCCCAAGCAGCTGCTTCAACCAGGCCACTGATTGATTTT  
ATAAGGATATACACTGGCGTTGGTCTTCAATTCAGAGATCATTACAAAGCACAGGCTTCTTTGAGGGAGAAGTT  
CTGTTTTCCATCAGAACCTGAATTTGTCCATCTAATGGTAAAAAGGCAAGTCCCAGTCCCTATCAGTAGTAAAGAA  
ATGTGGAAAACTTGTGCACTGTGCATGACAGGCATGAACAGAATGCTAGACATAATACCCCAACACAATCCCC  
GATATACTAGGAACCATGATCTCCAGTAGAAGGGTCATTATCCATCGTTGTTTCCAGAATCCCTCTTTTGTCCACA  
TCTTCTGAAGGGGAGATCCTTCAGATGAGGCATTCTGGATCCCAAAGGGGATTGTCTTCTTCTGTGGAAAGACAC  
AAATAACTCCTTTGGATCTTATTAATAAGGATGCAGGCCTCTACATTTTCCAGTTAAGACAACCTTTCCATTTGATAA  
TTTCTCTAGATCTGTTTGGTTCTGAACAGTGATGATCAGCTGCAGTGTGGCCTTGCTCATCAATATTCAAAAAATTA  
AGAGTAAAGAGTACCATGGAGATGTCCACTCTCAGTGTTAAGGGTAAGAGCCTCATCGACTCACCTTTCTTTTTG  
ATAAGGTAAGTTTTAACAGTGTGGTGGGAACGTTCCACAATGTCTTGTCCCTGTATGGCAAACCAGTTAAATAAGT  
TACATTCCTCTGTAGACAGAATTGTTGAAAATTTGAGAGGTGTAGGCCAGTCCATTATCGGTTCTAAGAAATTTG  
GTTTGTCCCAAGCACTCCAAGCTTCAAGGTAATGTTGAATTACATGTGTGGCTTTTTCTTAGTAGAGGATCAGTTT  
TACTGCCCTCTTTCTCTCTCCCCTTCTTCTGAATCCCTGGGAGGGCCCTTTTTCTTAGACATGTCTTTCTTTTTTCGA  
GCTCCCATTCTCTCATTCTGTTAGTTTCTGACATACTGTCTGAACCTTTTCTAGTATTCCCTGTCCCTCCACATTGG  
CTGTTTGGCAGGTTTCATCCTCTAGACAGTTTTATATCAGCTTGCAAATGCCTTGGTGCACAGGCATAAGTCTCCCT  
CTTCATGCTTAAGGTCAAGGTCACTTCTAGCTTACTACATAAGGCTACAGTTAGAGACCCCGAACAAGAATACCA  
GGGAGAAATGCGATCCACTTCTTAACAAAGTTCTGCAGTGTACTGGAGGCAACCTGCCTGTAATGCAGTGATCAC  
TGACTGTGAGGAGGCCATGATAGAGTGAGTCCCTGCTCCGATCTACACCCATTTATAGTACTCCTTAAGCAAAGC  
GAAAGTAAACACAGTGCTCTGTTCCCTTGTCTACGGAAGGCTTAGAAGATACCTCAGTGCTGCCACTTATCTACGT  
CGGACTGACAACACCTCATTTTTCAGCACAGCCTCGATGGACCTCAAATTCAGCACAGCCTCGATGGACAGAA  
TAAGAAACAGAATGAGGGCCAGGGCAACCAAGACTAGAGCTTCTACTCCCCCTTCTAGGGTGCATCTAGATTAA  
GACCGAAATCAATAGGGATAAGAGGGTCACGATGAGACATACCTCTCCAACTTACCTTTCCCTGCAGTTCTGAA  
TCCACCCCATTTCCAGGGGTTCTCCTCAATGCCAGCGATGTTGATCCTGGCTTTATGGCACCGGATGACCTGCGCTA  
CCATCTCGCCAGCAAGAACACATGCAGGACACTCAGATCTTCTGCAGTAAAGCTTTAATACATCTCCAGAGATAG  
ATTAACAGCTTCAAGACAGGAGACCCAGAGAGCAGGTTATATAGGTTGCAAAGTATGGTTAGAAATACGTTGGA  
GACGTGAATCACCGGAATTGTCTGCCACCATCAGCCTGATGACGCCATTGGAGTGGCAGGGCTCAGGTAATGGA  
ACGATACCCTGACGCCTGAGCGTACTACCATGAGCAATGTTGACAATGGTGTGTCAGCACCATCTTGATTGGT  
GACCGTGAGGGCGGCTCCTCACAGTGGTAGAAGTAATTGCAGGGTTTCTAATCCTGATTTGAATTTGGTACCTG  
ATATCTGTCTAGATAATTGTCCATTTATCCAGACTTTCAAGTTTTGTTGAGTACAGCCTTGAATAGTAGGATCTGAT  
GATATTTAAAATTTACTAAATTTCTGGTGTATTTCTCCCTTTTCAATTTCTGATTTTGTAAATTTGGATGCTGTCTTG  
TGTTCTTTATTTAGTCTGTCTAATGGTTTATCTATCTTGTGATTTTCTCAAAGAAAAAGCTCCAGTTTGTGTTGATTA  
TTTTGTATTGTTCTTTGTTTCCACTGGTTGATTTTAGCACTGAGTTTGATTATTTCTGACTTCAACTCTTTTTGG  
GTGAATTTGCTTCTTTGTTCTATAGTGTTAAGGTGTGATGTCAACCTACTCCTATATCCTCTCTCCGGTTTTTTAG  
AGGCATTAGAGAGAGCTATGAGTGTCTCTTAGGGCTATTTTCAATGTGTTCCATTACTTGCAGTATGTTGTAGC  
TACATTTTCATTAACCTCTGAAAAGTCTTTAATTTAGTTCTATATTTCTGCTTACTGTTTTGCTACTGACTAGATTG  
TTGTACACATTCCACGTGTATGTGCGTTTTCAATTTTATATTGTTGAAGTTAGTCTGTGGTGATCTGATAGGA  
AGCAGAAAATTTAATAATTTTATATCTGTTGAGGCATGTTATGTGACTGAGTGTATGGTCAATTTTGGAGAA

GGCATCGTGAAGTCCTGAGAAGAAGGGACATTCGTTTGTGTTTAGGATAAAAATGTTCTATAGATATCACCTAAACGT  
ATTTGCTTCATAAATTCTGCAAGTTTCGTTCCCAAATCTAAGGAGGGGCATAGTGTCCACACTTCAGTCTTCATTCTT  
CTTGAGTTTCATGTGTTTAGCAAATTATCTTATATCTTGGGTATCCTAGGTTTGGGGCTAATATCCACTTATCAGT  
GAATACATATTGTGTGAGTTTCTTTGTGAATGTGTTACCTCACTCAGGATGATGCCCTCCAGGTCCATCCATTTGGC  
TAGGAATTTATAAATTCCTTCTTTTAATAGCTGAGTAGTACTCCATTGTGTAGATGTACCACATTTTCTGTATCCA  
TTCCTCTGTAGAGGGGCATCTAGGTTCTTCCAGCTTCTGGCTATTATAAATAAGGCTGCTATGAACATAGTGGAG  
CATGTGTCCTTCTACCAGTTGGGGCATCTTCTGGATATATGCCAGGAGAGGTATTGCTGGATCCTCCGGTAGTA  
CTCTGTCCAGTTTCTGAGGAACCGCCAGACTGATTTCCAGAGCGGTTGTACAAGCTGCACTCCACCAACAATG  
GAGGAGTGTTCCTTTCTCCACATCCTCGCCAGCATCTGCTGTACCTGAATTTTTGATCTTAGCCATTCTGACTGG  
TGTGAGGTGGAATCTCAGGGTTGTTTGAATTTCCCTGATGATTAAGGATGTTGAACATTTTTTCAAGTGTCT  
TCTCTGCCATTCCGATTCCTCAGGTGAGAATCTTTGTTCACTTCTGAGCCCCATTTTTAATGGGGTTATTTGATT  
TTCTGAAGTCCACCTTCTGAGTTCTTTATATATGTTGGATATTAGTCCCCTATCTGATTTAGGATAGGTAAGATCC  
TTTCCCAATCTGTTGGTGGTCTTTGTGTCTTATTGACGGTGTCTTTTGCCTTGAGAACTTTGGAGTTTCATTAGGT  
CCCATTTGTCAATTCTCGATCTTACAGCACAAGCCATTGCTGTTCTGTTCAAGGATTTTTCCCTGTGCCCATATCTT  
CAAGACAAAACACCCATGGAAGGAGTTACAGAGATGGAGTTTGGAGCTGAGATGAAAGGATGGACCATGTAGAG  
CCTGCCATAGCCAGGGATCCACCCATAATCAGCATCCAAACGCTGACACCATTGCATACACTAGCAAGAGTTTAT  
TGAAAGGACGCAGATGTAGCTGTCTTGTGAGACTATGCCGGGGCCAGCAAACACAGAAGTGGATGCTCACA  
GTCAGCTAATGGATGGATCATAGGGCTCCAATGGAGGAGCTAGAGAAAGTAGCCAAGGAGCTAAAGGGATCTG  
CAACCTATAGGTGGAACAACATTATGAGCTAACCCAGTACCCCGGAGCTCTTGACTCTAGCTGCATATATATCAAA  
AGATGGCCTAGTCGGCCATCACTGGAAGAGAGGCCATTGGACTTGCAAACTTTATATGCCCCAGTACAGGGGA  
ACACCAGGGCCAAAAGGGGGAGTGGGTGGGCAGGGGAGTGGGGGTGGGTGGATATGGGGGACTTTTGGTAT  
AGCATTGGAAATGTAAATGAGTTAAATACCTAATAAAAAAATGGAAAAAAAATTTCTGCAAGTTTCACCATGTATCT  
TTTTAGTTTTAGTTTCCAGGATCTGTCCATTAATGAGGGAGGGGTGTTGAAGTCTTCCAATATTATTGTGTGGTA  
CAATGTGAGTTTTGAGCTTTACTAAAGTTTCTTTTATGAATGTGGATGTCATTGCATTTGGAGTATATATGTTTAGA  
TTTGGGAGTCCATCTTGGTAAATATTAACCTCAATGAATATGACGTTTCCCGCCTTGCTATTTAATAACTTTTGGT  
TGAAAGTCAATTTTATTTGATATTGGAATGGCTGCTCCACCTATTTCTTCGGATCATTGCTTGGAAGTCTTTTC  
CAGCCTTTTAGTCTGAGGTAATTTCTGACTTTGTCCTTGGTGTGTTTGGTATGTTGAATATTGCTTACACATCC  
ATTTTTTATTCTATGCCTTTTACTGGTGAAGTACTGAGTCCACTGATATTAAGAGATCCTAAGAAAAGTCTTGTGCT  
TCCTGTTATTTTTGTTATTAGAGTTGGAATTTTGTTCATGTAGCTATCTTCTTTAGGTTTCTTCCACTTTAATTTCTT  
CTTTTTCTCGAGTGAATTTCCCTCTTATATTGAAATTGTCCCTTATTATCGTTTGTGCTGGATGCATTGGAA  
GATATTGTGTAATATTGTTTTGTACAGAATACCTGTTTTCCCAAGCTATGTTAAAAGAGTTTGTTCATGTCTT  
GCCTGGAATTTCTGCTCTTACATTCTGTATTACTTCAGCCCTAGATTTTCTCCTTTCATAGTCTCAGGGGAGAAGT  
TATGTGTAATCCTGATAGATCTTGCTTATATATTACTTGACCATTTTCCCTTACTGCTTTAATATTCTTTCTTTGTTT  
TGTGCATTTGGTGTGTTTACTATTATGATGGCAGAAATTTTTTTTTCCGGTCCAAATAATTTGGCGTTCTGTAG  
TCTCCTGTTTATTTCATGAGCATATCTTTCTTAAAGTTAGGGATTTTTTCTATAATATTGGTAAAAATATTCACTAGC  
CCTATAATTTGGAAACCTTACTTCTTATCTATGCCTATACTGGATTTTCATGTACGTAATTATGTCATTTCTAAAAGCT  
GTTTCAAAAATTCACCTGGGCAGTATTTCTGAGAAATCAAATCATTAAATTTTTATTCCCTTTTACTAATATAGCA  
TATTATGTTTCCATTTTCTGTTGTCCATATAGTACAGAGCCAGCATTGACAAAGATGAGAATATATCACCTCAGG  
TAGAAACAGATGAAGATACGGTGAATTTTTCAATTTTTCCCATTTCAATAGAGTACTTCAAAGTGGTGTGTTGT  
GATCCCTTGACTGGAGAAGTAGATTGAGGAAAAAGAGTAATTCAGGGTTAGATGCTCTTATATGTGTAGTTCAAG  
ACCAGATTGTGGTCTTTAGACCTTGTGATCAGAAAAACATAGCAACTAGTACAATACAACCACCTGCATGAGATG  
TTCCAGATATACACAAAAGAAAAGGAGAACCATTATAAAAAATAATAGAAGGACCATTTGGGAAGAAGAAGGAT

CTCAGCAATGGTAGTACAGTTATGAAGAAGTGCTGTGAGGTGTAATGTATGAATTGTTTAAAGTAAATATTACAA  
GTTTTTTTTTGAATTCTACCATGTATTTTATATGGATATGATATATGGTTCAAATCAAATATTATATATTCATTA  
ATAATTAATAAATTTTCTGTGTAAAGTTTTTGTGTGGTAGAAAAATGTCCTATGGTGAGACTCCAACTTAAAGT  
GTATCTCGCAGGAAGGTAATCCCCTAGACGTTTCCCAAGCTTGTTTTCCCTGATCTCTGAAAAACAGCTAGGAA  
GAAGCTCTTTGTTCTCTATAGCCAGCAAAAAGGCTTTTTGTTTCTATACTTTCAACCAGAGATGCCTGCCTTCTGT  
GCCAAGGACAAGGAGATAAAAAATTTAGAAAAGGACTCACGCCCCACTCCTGCCTTGTAATTTACCAAGAACATCA  
GGAAGAGAAGAACTCCCTTGCCACATTTCCCAACTCCTCCCAACTCCTCCCAACTCCTCCCAATTCCCAGCTAG  
CTGCTAAAAGCCCCTTACTGTCACAGCTCGGTGTCAAACCTCCCCTGCCCTGCTAGGCAGAGTGACTTTGTCCTCAGC  
CAGCTAATAGTAAAACCTCTTGCAGTTTGCATCAGTTGTGGTTTTCTTGGGTCATTGGGGTGCTGGCCAGCTCTT  
CCCGGGACTTGAGAGGAGGCCAGCTTCTGAGGTCTTACATTTGGGGGCTTCTCCACCATGATTTGTGGCCTACCC  
CAATTCTCAGAGACCCTACTTGAGAGTAGGATTCTATCTTTGTCTGTATCTTTGTCTCTATCTTTTTCTATAACTTCC  
TCTATCTTTGTCTCTATTTTTTTGTGCCAGCTCTGTTTGAATTCACTATTCTCTGTTTGCAGTTGTAAATGCTCGTGAG  
AGCAACGAACTCCCTTTTTCAGATGGAAAAGGGTACTGACAGACATGTCAGGAGAAACCGGCTGCCACCTTTG  
GGACATCCCAGGAGTTCTGAGGGAGTTCTAGGGATACCTGGAGATCTCCTATCAGTGTCCAAGTGAGAGTGTGC  
TCACTCGGCTGTCTGTTTCTGTTACTGGGTGCCAAGTGAGTGTGTGCTTTCTTGGCCATCTTATTGGGGCCTGGTCT  
TGTTATTGTAATCTTTTTGTGTATATGTTTTTTTTTCCCTGTATGTGACTCTGATGATGGGACCAACTATTATCA  
TGCCCTTGGACTGACCCTTGATCACTCGACTGAAATTAAGACTAACACTCACATTCTCTGTGGATGTCTGAAAT  
CGATTTTAGAGAACTTTCTGATCTACAGAATGGCCAGCTTGTATGATAGTTGGCCACTAGAGGGCACTCTTTGTTG  
GTTCTGTTTTCAGCTCTTAATGTTGTTTTACAGAGGGGACCAGGGTCTCAGCCAGATTACGTGCCATACATTCTCAT  
CTAGAAAAATTTAGCACAGGGTCCCCCTCTCCATCCTGTTTAAAGCCTTGGGTAAAAAGAATAATCCAGGCTCC  
CCAGTCTGGCCCTCTGCCACCCAGAGGTAAAAAAAAGTTAAAACCTGGCACAGGTTGAACTGCAGCCCTCGGT  
TTCTCCAAGATCTATCCAGAGTTAGAAGAACCTCCAAAATGGCATAGCACCCACCCCATATTTCCCAACTGGTCC  
CCTCCAAGAACTCTCAACAGGGTGCCACTAGATATTTGGGGAGGGACCAGTTGCTAAAGCCCAAGGCCAGCGAGC  
TCGAGGCCAGAGTGACCAGATTCAACCATTGCACTGCCTTTATGTACTTATGACCCTCTCCAGCAGGCCCCAGA  
CAACTGCTGACCCTTAGTAATGGCCCTTTCTCCTCTGAACTCTATAACTGGAAGGCTAATCACACCTCCCTTCTT  
TGAAAACCCCTCTAGCCTGCTAATCTAATGGAATCTCTCATATTCTCTCTTCAGCCTACTTGGGATGACTGTCAGCA  
GCTACTGATTCTTACCACAGAGGAGAAGGAGAGGATTCTGAGAGGAAAGAAAGAGCATGCTGGGGGCCAATT  
GACTACCAATAAAAACCTTCTGAATGAAATGGATGCAGCCTTCCCTCTGACATGTCCTGACAGGACTGACCATATGGA  
GCAATTGACAATTTCTGCTGGGCTCTGATAATAGGACTGAAAGGAGCTGGCAGTTGCCCCACCAATTTGGCCAAG  
GTAAGAGAGATCCTACAAGAGAAAAAGGAGCCCCAGCAGTGTTTTGAATACCTCTGAAAGGTATAGAGGTGT  
TACACTACCTTGGCCCTACTTCGGCGTGCCAGCAGGTGACAGGTGTCATGGCTTCCATTGGGCAGTATTCTTCTGA  
CATTAGGAAAAGGTTACAGCGTCTAGAGAGTCCGAAAACATTATCTTTACAACATCTGTTTAAAGGAGTCAGAGAAA  
GTGTACCATAAGAGAGAGAGTGACAAGTCAGCACCAGGGTATATTGTGCTCTGAGTCTGCAGACACGCTTAAGGT  
CCCCAAAAGACCCTAAATGGGATCATAAGACCTCTGGTGAACGGAAACACAACCTCTGCTCCAATCCAATCTCACA  
GGTTCTGAGACTGCATTAATTAGGGAAGCAGAAAACTGGCCTGACAATGGTCACAAGTCCCTCTGGTCTGTGCC  
AGCACCTGGCCAATTGTTGGACAGAGTCTGAGGACAGCCCCAAGGTCCTCACAGAAACATCCACGAGATCTTAA  
GACCTTTGTGAATGGAAAACCACTTCTGCTCCAATCCTATCATGCAGGACCTGAGACTGCATTATTAGGGAAGCA  
GATAAACCGGCCCTGACCAGGGTCACAAGTCCCTTCCAATCCATTACAGCACCGGGCACCTTGGGGACAGAGTCTG  
TGGACAACCCAAAGGTCCCCACAGGACTCTCCATGGGATCTTAGTACCTCTAGTGAGTGGATTACAACATCTGCCA  
GGAGGAAGGTTCGAACACCAGATATCTGGGACTCTTCTCTGCAAGAGGAGATCTTGCCTGCAGAGAGTACTCTGA  
AACTCAAACCTCAGGAGAAAACCTAGTCTCCGAAGTCTGCTGATAGAGGTAACATAATCACCTGACCATCGTTATG  
GCAACTATTAGAAAACAAAGCATTAAATTGGAGGCTTTGTTACATTTTTCAGAAGATTGGTCAATCATCATGGGAGG

TACCCCATCACTGGAGCAATAGAGAACTATTGATCCTTAGGCAAAGAGAGAGATTCCGCCATTGTATTGGCTTCTT  
GAAAAC TCAAAC TCACTCCTTGTGACACACCTATCCTCCAATGAAGCCACACCTTCTCGTATTCTTCTAATCTTTAA  
ACTCACTGCCACTTCTGGTAATGAAATATTCATATAAATGTGTCTATAGGGGATTTATTATTCAAACCAATTTT  
CCCATGGCTCGATCAGCTATTTTTTTTTTAAATATAACCTAAAGGGCTCCCATTTATTAAGGACTACTTATGAGCTTAG  
CCACAGTGATGGGCCCTCCACATCAATCATTAGACTAGAAAATAACCCATAGACTTACCTAATGACTAAGTGATT  
GGAGACAGATGTTCAATTGTTCTCTTCTCAGGTAAGTGTAGATTGTCAAGATGGGAAAAAATAATGTTCCATC  
ACAGTAATGTTTAACTTACTCCATAACCTACACAAACATTACTCAACATCATCTATTGCATTCTGCCCTGCATAGAC  
ACACTTCCATGTATGGCATAAGTGAAGGGTGACTACCTCCATCAGCAAGGATACTCAATAATATGTGACATGAACT  
GAATATTTCTATAGCCTCATAACCCCCACATTCTACTGTGTGTACACTTATTGGGGGACTTGCTAATCTGTCCAAT  
ATCCTGCCACCAAAGCTATGACAAAAAAATCCTCATCATAAAATCATTTAATGATTTTAAACACTTTTACCTCCGT  
TCCATTTTCCCATCATTTTCTGCTACTTTCATATGATATTGCAATCTATTAATAATAGTAGTGAATACAGCGAAAGGA  
CCAGTGTGTGAAGCAGCAAATTTCTTTATTTCTCAGACAACAGATACAGTGCCAGAATCTTCCAGGTACAACCTGCTT  
GGTAACTTTGTGTCTAATGTTAGCATGATTCTTCCAGAAAAAGCTTAAAGAATTAACCATGGTACTCTGGACCA  
GACAAGTCAGTACTAGTGA AAAACATTTCATGTAATCATTTTCATCACTGTTACAATGTGCCTTAGCAGCAAGG  
AAAACAGGTCATGGTCACAAGAGTATGAAAGAGGCATCAAGGAGCACAGTTGTCCAATTATTAGCAGCCAGTA  
AGCATCAACACAGGAAGCGACCAAAGACAATAAATACCTTCCAAGACATGTTCCAATGACCATGTTCTTTTACAA  
GTGTCTCACCCCTTCAATGCACACCCATCAATCAATTAACTCATTGATTAAGCCCTCAGGGTCCAATCACTTTTACG  
ATTGTATATATTGTTCTACCTTTGAACATTGTACTTTGGAACAAAATCTTCATCAAAGACCCACGACTGACATTGCA  
AACCCTTTACCACAGAATTTCTTATGTTACAAAATGTGATAGGATCAATCTGTCTCTTTAAGGGTATCTCTGTCTA  
GCAGTTACAAATCAGAACGTCCAGGCCAACAGAATCATCACCACCATGAGCTTTTTTTTTTTTTTTTAAATAGAGT  
TCAAGAAGAAGGAAAATGCAATGCAAGTTAAGGGTCTTGATCCCTTATCCATCCATCTTAAAGCCATAGGGTGGAC  
CCAGAAGTTTAGGTCAAAGTGTAATTTACCTATACTACAAAACACTGTGATGATTTCTAGCCATCTCCAGTTTC  
AGTGTGGTATTTAGTCCCACCATCTACATCAAGGCATATTGCCTAATGTGAAATAATGCCAGCTGTTTATTGCAAAA  
ACCACTATGTATTGACTTGGATGTA AAAATGAGACATCTATAATATAGATACACTTGTACACGTACACATACTCACAG  
AAAGAGGCAAGAAGTAGAGGAGCTGAATCTTAGGATCCCTCAATGAAGAGATAGTGGAATCTTGTAAAGGCAGA  
GAGGTCATTGAGACACTGTATGTCTCTATCTGCACAAAATCAGGCCAGTCTGCCTTCCATCAATGAGTTGTAGGTTT  
TCACTATCCATCATCCCCATTTGAGAAGGTATGGACAGTTAATGAAAGATGGAGAGTCAGTTTTTATCAAAGGTAT  
GCCCTTTGAAGGTTATAGTTGGCCAGGCACTACTGGTAGCCCCATATCCAAGATTTTATGGGCAACACAATTGAT  
TTGAATGGGTTTTATCAAAGGGAGAAAAGGAGACATGAATTTGGAAGGAGGATTTAGGTGGAATGGATCTGG  
TTTTGGTTCGGGAGGAGTTATTAAGAGA ACTGGAAAGTAAATTCATCAAATATATTGTATGAATTTCTCAAGTT  
ATTAATGAATGTAGTTCTTAATATAACAATATCTGTACTGAACCTATACAGACGACTTATATTTCCATCTCCTAAATAA  
CAAACCTTGTATAGCAGTTTCATTACATTAAGGGCAAAAAGTAATCCAGAGATTATTTAAATAAAGAAGGATCAG  
AGGTGATGGCCAGGGGTAAATTCATGTGTGTGTTCAATTTACTTACAACACCAAGTGCTTAGGATTTTTAGAGGGGC  
AGAGACAGGAAGATGAATATGACTTCCCGAAAGCCAGTCTCAATATTAGCTCAGCAGGAAACCTATCAAAGCA  
GATAAATTAGGGAGTGAAGGAGCAAATCATACTATGCCCTTCCCTAGCCTCTGAACCTTACCTGTACAGATCTGTGT  
GCAGAAACACATGAATATAATTAATAATAACAAGAGCTTATCTTGCATAGCTTATATGCAGTGTTTTGTTATCTTAG  
CCTAGAGTCTGAGGACTTTATATCATTACAGTTCCTGAAGCAAACCTCCCAGATATAGTGGATGGGTATATCTTGT  
TACTATGCAAAGAGACCTCAGTTAAATGTGTGTGTGCTAGTACTCCAAAACACCTTTCTTCTACCTTCTTTATAT  
GGCACAGAACGACCTGTA AATTTAAATAATGAAAACAAAGCTTTTTTACGAATTTAGGCTTGTGTTAAAATAAT  
ATTTATAACATTTTATTGAATGGAACAGAAATCTTCAGCTCCCAGAAGAAATACAGTGAATCCTGTAGGCTTCTGTT  
TTGTCCATTATGAAAAAATTAATTGCAAATCGACAGTTCACACTTTTAACTAAATCAGGATGAAGGGGATATGT  
TTCCATACAAATAAGTAATGCCAAAGTATTAATCAAGTAGAAATGTGGCAGGGTTAGGATGCCTTTGGCTGATGT





AATGGGCAAGTATATTTGAACACAGAATGATAGCCACAAGACATCTGCCTGGGTTTGGTATGGTATACCACAGCA  
AGGCTACAGCCATGTAGAAGAAAATACCTTTGAAGAGGCTTAGCATGTCCTCCCTCATGAAGAAGAGGAGGAGG  
AAGTCTTCTTCCAACACCCTGAGGAATATTGTCGGCTGCAGAATTTCTCATTGTTGGAAGGAAGGTAATGAGCCTG  
TCACCCAATGGAAGGCCATAGTTCTAGGTCAACTGCCAACAAACCCTTCTCTTTACTTGGTGAAGTATGATGGAATT  
GACGGCATCTATGGACAGGAGCTCTACAGTGATGACAGGATTTTAAACCTTAAGGTTTTGCCTCCCATAGTAGTAT  
TTCCTCAGGTGAGGGATGCCACCTTGCCAGAGCCCTGGTTGGCAGAGCGGTACAACAAAAATTTGAGGAGAAA  
GATGGCTCTGAGGTCAACTGGAGGGGGGTGGTGTAGCCCAGGTGCCAACCATGAAGGATTTGTTTTACATTACC  
TACAAGAAGGATCCAGCTCTCTATGCTTATCAGCTCTGGATGACTACAAGGAAGGTAACCTCCACATGATTCCAGA  
CACTCCTCCGGTTGAGGAGAGATCAGGAGGTGACAGTGATGTGTTGATAGGTAAGTGGATGCAGTACACCAGAA  
AAGATGGTTCTAAAAAGTTCGGAAAGGTTGTTTACCAAGTTCTAGACAATCCTTCCGTGTACTTTATCAAGTTTCAT  
GGTGACATCCATATCTATGTCTATACTATGGTGCCAAAGATTCTTGAAGTTGAAAAATCATAAAGTACAGAAATGT  
AAACATATAGGACTGGAAGAAAAAAGTTTTTTTTCTGTGTTAGCTATATAAGGGTCTTTGACAATCCCAGT  
ATCTTTGCCAATAAAATGTATTTTGTCTAAAAATGTAATGTGTGACATGACATGCTGTGAGTGAACAATTTGCTG  
GAAGAGATGGCCTACAGTGAAAGGAACGTCAAATGAAGATGAAAGTTTCATTTAGGGCGGTGAACAGTACATAC  
ACCTAAAATCATACTGCTAAAATGAACAGCTTCTCTGGTCTGCATGAAGAATAAGGAAATGGAGATGGAACCTTG  
GAGGAGCAGGGATGGCAGAAAAAGATGGATGTTTAGGAAGTAGGGGAGAAGGACAGGACATAGGTAGAACCTC  
TGATGTGAAGACTGAAGGAGAAAAAATTTGGGAAAGTGGGACATTTAAAAGAAATGTGGCCTTGTTCACA  
AGGTGAAACCCAGAAAATGATTGAAATAGACTCAGAAAATCAGAGAAAATCAGGTTTTCTTTGAATAATGACACTT  
AAAGAAACCTGTCTCACATTTTAAAGATTTATTATCTTTACTTATGTGGGTGGGGATATGGCATGTGCTTTT  
AGGTGAACATAGAGACATGCGTTGTCAGGTACTCTGGAGCTGCCATTAAGGTGATTATTTGCCATTGGATATGA  
AATCAAGAAACCAAATCCATTTTTCTGTGGTGCAAAAGTGCTTGCTACCATTGATTCATCTCTCTAATCCCACAAA  
GATATCTTTTTTAAAGAAATCCAAAATTCACATTCATAAAACAGACCAGATTGAAGATAAGAAAGTTCTAATTGATG  
GTGACCATTAAGTAATAAGGGACACACAAAGAGTAGAGGACACTGAGAGACAAATGAATTCTAAGTTGGAGT  
TCTCAAAAAGTTAAGCTGGAGACACAGAAAGAAGAGAAATTTAAGGAAATAGTCAAACCTGGGCCATATCCACA  
TTGGCTTCTTTGTTTTCTTAAACAAATAGCCAGCCTGTCATTACAGATGGGTGTGTTGTGTGTGTGTGTGTGT  
GTGTGTGTGTGTGTGTGTGTTGTGAGTGTGTGTGTCCATTTTTACACAGGCAATCTAGACTAGTGAATGTTTATAT  
TAATGAGACTCCCTAAATCATCACAGAAACCTTGATTTTGTGTAATCAGTTCCAAAAGTAAAGTAAAACAGAAAAT  
GAATATGCTGTGAGATAATTTTGGGTTGGAATGGATCCTGAGTTCCTTCCGTGAGCACTCTTCCCTGTGATGAATC  
CTGTGATCTTTTGCAGGTCTCCAATGAGATCCCAGATAACCATAAAAAGCCCCACAGTGGCCTGTTCCACCTAGCT  
CTCCTCTAAACACATGACCCCTACATACCTATGTATAACTTCAGCCTGTCTATAGCCTGGAAATTCTAGTCTTTTAC  
TTATATGTGACCTCATTCTCAGAAAACACTGAAGGTGTAACCAATGCATATATGCTTACCTCTTTTATACGCCAGTT  
GACATGGGTTTCAAATGTTATGAGTTTGCCCACTTTGTGGGTCACTTCTGAGGAGCCCGTGTACTTCATGGAGGT  
CTGCCTGGGTTCCATCTATACTCTGAGAGGTTTTTTTTTTTTTTTTTTTTTTTTGAGGCAGGAATGCCATGGACTCAGTC  
ATTACAATTTTCTCTCTAGAATAAGTTTGTATGCTTCAGCATTGATAATAATCTCTATTGTTGATTAATTTAATAT  
CTGGGATAGTTTCTGCAGTAACTGATTCTCTTAGGGATTAGTTGCTGTGAAAAGACACCATGTCAAAGGCCACTCA  
TAAGAGACAACATTTTCATTAGGGCTTTTCTACATTTTATTACAGTTTCCAGAGATTTACTCCACGATCATCAAGGCAG  
AAAATATGGCACTGTCTAGGCAGACATGGTGGTGGAGAGGAAGTTTAGAATTATGCATCTTCATCAAATGCTTCC  
AGGAAAAACTATGTATTCTGTATGCAGGGAGGGTCTTCCACACTGGTAGAGCTTTAAAGCCCCAAAATGATATG  
CTTCTCCAGCAAGGCCGACCTATTCTACAAGGCCACACCTCCTCATAGACATAATACATTTAGAATGCCACACT  
GGTTTCATAACAATTGACCAGATCTAGGTTTCATCAAAGAGGAGGAGCCTCAGTTGAGAAGATGCCTCCACAAGAT  
CCAGCTGTTAGGAAATTTATAATTGGTGGGAGAGCACCCACTCCATTGTGGGTGTTGACATCCTTGTATTAGTAG  
TCCTGGGTTCTTTAAGAAAGCAAGCTAAGCAAGACTAGAGGAGCAAGACAATAAGCATCACACACCATAGCCTC

TGAATAAGCTCCTGGCTCCAGGATCCTTTGTTGTTTCAGTTTCTGTCCCACTTCTTTGATAATTAACAACAATGTGG  
AAGTATAAGCTGAATAAAACCTTTGCTATGGAATTTGCTCTTTGGACATGGTGGATCCTTACAACAATAAACATAG  
TAAGACATTCATCAGAAAAATGTCTAACAGTGCCAATGCCACTTATCTTAAAACCACAAATAATAATGTGTAGACAT  
TTTATTTTATTTAAAGGTAAGATATACTCGTGTACCTACCTGAGATGTAATGTTCTAGTTTGCTTCTTTCTCACTAT  
GTAGAATACTACAATCAAAAATTACTTGGAATAGAAGGGTTATAGTCTATCACCGAGGAAGACAAAACAGGAAG  
TTGTATCAGTAACAGCAAAAAACTGCTTATTGGCTTGCCACTGTCTTAGTCACTCTTTTATTGATGTGAAGAGATAC  
CATGGATAAGGCAACTATTAGAAAACAAAACATTTAACTAGAGGCTTGCTTACATATTCAGAAGTTTGGTCATTCA  
CCAAGGGAGGGATCCCAACACTTGAGCAATAGAGAACTATTGATCCTTAAGCAAAGAGAGAGATTCTGCCATTGC  
TTTGGCATCTTGAAAACCAACCCATCCTTGTTGACACACCCACTTCTCCAATAAAGCCACACCTTCTCTTATTCC  
TTCTAATCTTTAACTCACTGCCACTTCCAGTGACTAAGTATTCATATATATGTGTCTATAGAGAACTTTCTTATTCA  
AACTACCAATTTTCTATGGCTTGATCAGCTTTTATTATTTTAGTACAGTCTAAAAGGCTCCCAATTTAAATGACTACT  
GTTGAGCTTAGCCACAGTGGTGGGCCCTCCACATCAATCATTACCCAAGAAAATATCTATAGACTTACCTAATAA  
CCAAGTGAATAGAGACAGATCTTCAATTGCTCTCTGATAAGGTATCCGTTGATTGTCAAGATTGGGAAAAAATA  
AAGTCCCATCACAGGAATATTTACTGACTCCACAACCTACCCAAACATTACTGAACAGCATTTCCTCCTCTCTGCC  
CTTCATAGACCCACTTCCATGCATGGCATAAGTGAAGGATAACTTCTTTCATCAGCATTGATACTCAATAATAGGTG  
AAATGATGTGAATATGTCCTATAGCCACACAACCCCCACATTCTACTGTGTGTTACACTTACTGGGGTACAACCCA  
ATCTGTCCAATTTCTGCCAACTCAGCTATGAGAAAAAAAATCTCCTCATCAATAGATCCAATGAATTTTACCTGAT  
TTCTTCTCCTGGGGCAACTCAGTGTATCCCTTCATGCATATATTGGTGTCTTATTCATCTGTACTAAAACCACTAC  
TATTAATAGATACATCACAGGAGATATGACAAATACCAACTCCCATGAGCAGCTGCACAGTTGGCCAAGCCTTTTC  
AGTGCTTTTTTGAAGTTTCTTTGTATACTAAAAAATCAATTGATTTCTTTAAGTGTATAATTTAATGATTCTAACAC  
ATTTTACCTCCATTCCATTTCCCCTCATTTTCTGCTTCTTCATATGATATTGCAATCTATTAATAACAGTACTGAAG  
GCAGAGGGAGGATCAGTGTGGGAAGCTGCAAAGTTCTTTAATTCTAAAACAACAGATACACTGTCTGAATATTCC  
AGATACAACCTTTTTGGTAACTTTGGGTCTACTGTTAGCATGAAATTTCTAGAAAAAAAACCTTAAAGAATTAAGCC  
ATGGTTCCTCTGGACCAGAGAGTTTAGTATCACTAATGAGTCATATTCATGTCAATCATTTTCATCACTGTTACAAG  
ATGCCTAGCAACAAGGAAAACAGGTCCATGGTCACAAGAGTATGAAAGGGGCATGAATGAGCACAATTGTCCAA  
ATTATTGGCAGACAGTAAACATCAACACAGGAAGCAACCAAAATACAATAAACACCTTCCAAGACATGTTCCCAATG  
ACCAAGTTCCTTTACAAGTTTCTCACCCCTTCCATTACACCCATTAATCAACGCATAGATTAAGGCCTCAGGGTCC  
AATCACTTTTTCAGATTGTATATATTGTTCTACCTTTGAACATTGTACTTCGGAACAAAACCTTCATCAAAGACCCAGG  
ACATTCATTTCAAACCCATTTACCACAGCATTCTTTATGCTACACAAAAGTATAGGATCTATCTGTCTCTTTAAGGG  
TATCTCTATCAAGCAGTTCAAAAGGAAAATGTCCAGGTAAACAGCATCAGCACCTCCAGGAGCTTTTATAAATGT  
GAGTTCAAGAAGAGCGAAATTGCAATGCAATTTAAGGGTCTTTGTCCCCATCTCTGCATCTTAAAACCATAGGGT  
GAACACAGAAATGTAGGTCAAAGTGTAAATTGCACCTATACTACAATAATTTGGATGATTTCTAGCCATCTCTAC  
GTTCTGTCTGTTACGGAGTCCACCATGTCTGCCTCAAGGCATATTGCCTAGTGTTAAATAGTGCCAGCAGTTGATTG  
CAAACAACACTATGTGTTGACTTGATGTAATAAGAGACATGTATAATATAGACATATTTGTACATACACACATACT  
CACAGAAAGAGGCAAGCAGTAGAGGAGCTTTGTCTTAGGAACCTCACGGAAGAGATGGTAGAAATCTTGTAAG  
GCAGAGAGGTCACTGAGACACTGTATGTCTCTATCTGCACAAAATCAGGCCAGTCTGCCTTGCATCCCTAAGTGGT  
ATGGTATCACTATCCATCATCCCCTCTGCGAATATATGGACTATTGATGAAGGATGGAGAATCAGTTTTTCATCAA  
GGTAAGGCTTTTGTATGTGATAGGTTGCCATGCTCTACTGGTTTCCGCATGTCCAAGAGTTTAGGGGCAACACAA  
TTGATTTGAATTGGGTTGTATCAAAGGGGAGAAAAGTAGACTTGAACCTGGGAGGAGGATTAAGGTGGGAATGG  
GTCTGGTTTTAGTCTGGGAGGAGTTATCAAGAGAATTGGAAAGTGAATTCCATCAAAAAAATTGTATGAAGTTCTC  
AAGGAATTAATTAATGTAGTTCTTAATATACAATGTCTTTACTGAACATATACAGACCACTTATATTTCAATCTCCTA  
AATAGCAACTCATTTTGTAGCACTTACATTACATTAAGTGCAAAGTAATCCAGAGATTATTTAAAATAAAGAAGG

ATCAGGGGATATGGCCCAGAGACAATGCCATGTGTGTGTTCAAACATTCACCTACAACACCAGTGCTTATGATTTT  
GGGAGGGGCAGAGATAGGAAGATGACTGTGGCTTCTGAAAGCCAGCTCAGCAAGAAACCCAGTCACAAGGGG  
ATAAGTTATGTAGGAAAAGAGTAGATCACACTATACCCTCCCTAGCCTCTGAACCTACCTGTACAGTTCTCTATGC  
AGACTCACATAAATATGATTAATAATGCAAGAGGTTATTTGCATAGCTTATATTCAAAGCAATGTTGTTTTAGA  
CTAGAAACCTGAGGACTTTATATCATTATAGTTCTGGAGCAAACCTCCAAGATATAGATGATGGGTATATCTTCTT  
ACTGTGCAAAGGAAACCTCAGTTAAGTGTGTGTGTGTCAGTGACTCCAAACAGCTTCTCCTCTATGTTACTTTATAT  
AGCATAGAATGATCTGTAATAATGAAAATATGAAAACAAAGCTTTTTTGTAGATTTTAGGCTTGTGTTAAAATCAT  
ATTTATAACATTGTATTAATGGAAGTGAAATCTTCAGCTCTCAGGAACAATACAGTCAATGCTGTAGGCTTCTGTT  
TTGTCCCATTGTGAACAAAATTAATTGCACATCAACAGGTCCCACACTTTTAACTAAATCAGGGAGAAGGGCTATG  
TTCCGTACAATAAGTAATGTCAATGTGATTATTCAAGTAGAAATCTGGCAGGGTTAGGATGCGTTTGGCTTATG  
TGATAGTGATGACTGATTAGTCTTGTATTCAAATAACCCTTACCTCTGAGAAAAGACAAGTAATGATATAAGAT  
ATACTACAAAGTGACATGGACACTTATTACTAGATTTTCACTTTACATACTTTAGTTGTTTGA AAAAATTGTGGC  
CCACAGAAGCTCAAATATTCAAAGGTGTTAGTTTTCCAGGTGGTGAGATGTTAAGAAAGAATTAGGATTTGTATTT  
TTATTAAGGAGATTTGTCACTATTCTTGAATATCAA AAATCCATCAGGCTCTCTCTCTCTCATTCTTACTCTCTCC  
TCATTCTCTGTCTCTGTCTCTTGTCTGTCTGTCTCTATCTGTCTCTCTCTCTCTCTCTCTCTCTCTCTCTCTCT  
CTCTGTCTCTGTTTGTGTCTGTAGTATTGCTTGTGAGCTCTCAGCTACTGCTCTACACATGAGTGCCTGCGTGTTC  
CATGGTGTACCATGATGTCCTGGAGTCGCCCTTCTGAAACTGTAAGACCACAATTAATATTTTCATCTTATAATTT  
GGTGTGGTCATGATGTCTCACATCATTAGAACAGTAACCAAGACATCCATATTCCAGTTAATTTTTTCAATCGTTCT  
GTATTTATTTCAATTAAGTTACCTTTTGTCCATTGAAAAGTTTTAAGAATACTTTTAAAGATCCTGAACAAATAGTGC  
CAGTAGGAGTGGCACTGTTAGGAGGTGTGGCCTTGTGAAGTATGTGTGACCCTGTTGGAGTAGATGTGGCCTTG  
TTGGAGGAAATGTAATACTGTGCTTGTGGACTTTGAGGTCCGTTATGCTTAAGCTGTCCCAGTGTGACACACAGT  
CTCCATCTTCTACCTGTGTATCAAGATGTA AAACCTCAGCTCCTTCTAGCATTGTGTCTGTGAGAATGCTTCCAT  
ATTTCCAGTCATGATAATAATGGAGTAAACCTCTGAAAACAAGTTACAAAGTGTTCAAGAGTTACTGTGATCCTGG  
AGACTCTTCATGGCAATAAAACCCAAACTAACACAAACACAAACATTCAA AAACACATTTGATATTTTACTATTCT  
TGGCCTAGGGAGTGGCACTACTGGGAGCTAATAACCTGTTGAAGTAAGTTTGGCCTTGTGAAAGAAATTTATCT  
TTGTGAACATGGACTTTAATGCCCTCTGCCTAGCTGCCTGAAAGCTAATCATTTCTAGCACCTTCAGATGAAGAT  
GTAGA ACTCTCAGCTCAAATGCACGTGCCTGCCAGGATCCTGCCATATTCTACCTTGATGATAATGGACTGAATT  
TCTGAACCTGTAAGCCAGGGTAAATTGAAAAGTGTCTCTGCTGATAGTTGGTTGCTATTCCAGAAAAGACCAAAGT  
TATGACGTACCATCCAGAGTCTGAGAATACATTGGTTTAGCTTCTAGCATTGTGACAGAAAACAGAATTAACAAGAC  
AATGAGAATATAAACTTCGTATTTCACTTAGAGACACATGGGTTATAGATCTGCGGAACTCAAGGTTTTATGG  
GTGGTATGGTAGAGTGATTAGTGTCTGTATATGAGTGCAGTGTCTGTTCCCAAGTCTGATGTACACATACACATA  
TGTT CAGTAATGAGTAGAATATCTTCAACACTTGCTCTCTTAGAGTGAAACCCTCTCACCATTTTACTAGTTTACT  
GTCCAATACACTATTGGGATATCTACCTGTCTCCACCCACAGTGTTGCAGATATGAATAGACATGCCTGGAATTTT  
ACAGAGGTGCTGAGAATACATGAACTCCACTGAGCCATCTTCTCAGCCCCAGCAGGGTATTGTTTATTGAAATCA  
ATGATCATATCAGTAGAGAAATGAAAACCAACATGACCCTGATATTTTATCTTACCTCCACCTTACACCAACTAAAT  
GAATTTTAAATATAAATTTAATTTATGTCCAAATGAATCAGATTACATTCTAATGAAAGATAAAATTGGAGTGTATC  
CAGATGAAAGCTATGTTAGTATATTTTGGCCATTTATATGGAGAATAACCTATATTTT CAGTACACTAGGAGAGCA  
AATGCATGAAATGAGTTCAACCAAAGAAAATCTTGTCCAGTGAATTTCTTGTAAAATAACGTTGAAAATCATG  
CCATTT CAGTTATATATATTTAATTTTGTAGTATGTTATTATGGGAACATGTGAGTTTTCTTGGATTCCGATTGCA  
GAATTAGAGTATAGGGGACCTGATTATGTGGCACTATTATTTTTTATTAATTAGTTCATTATTGTCCACCTTCTAC  
TGTTCCACATCCCATATCTACTGCCATCCCCTGTCTCCAAGGGCAAGTCCCCATCCTACCGGATCTCTAAACACCTT  
GATGTCTCTAGTTTGTGAGAATTTGGTACATCATTTCTGATTGAATAGAGATCAAGCAGATTTTTTTTTCTGTGTAT



CATTAGTAACTCTCTTAACGAAATGCAGGAGAACACAGATAAACATGTAGAAGTCCTTAAAGAGGATACACAAAA  
ATCTGTAAATAGATTCAGGAAAACACAATCAAACAGGTGAAGGAGCAGAACAAAACCATCCATAATCTAAAAAT  
GGAAATAGAAACAATTGACAATTCTCACTCAGGCCATGAAGCTATGGAATATTCCATTTACTGAGATCCAGAGGA  
GTAGCCATTTGGAAGATTGTGTCCCTAAATGTGAAGGTTGTGCTGAAACTCTTATGAAAATTGAGAACAATTTTAA  
ATATGAAAGAAAAAACACACATTAATAATTCATGTAGGCAAAATTGACAGCCTTCTATATGTCACAAAACACACA  
AGCAGAGATTACAATTACAGTAATTATTTTTATATCAAGGGGTCAAACCTCCTGATACAATCAATGTCCAAGAAGA  
GATATTTAGAGCACACACTCACCGGGGACAACTGTCATGACTGGGACAGCATGGCAGGAAAACAAAATGTTGATC  
TGTTTCATTGAGGGCCAGCATGGGGCCTTCTTACACTTTTGTGGAATAAGCAGCCAAGAGTTAGGTCAGAAATAGC  
CAGCGCCCTCAATTATGCCAAAGTAACCTATTTCTGCTAGGGAACAGTCCCAAATGTTCCACAACTTGCTAGACTG  
TTCCACTAGTTTGAGACACCTGAGACTGTGGGAAAATTTACACCCAATCTTAATGAAACTGAACCAGGCATGTGT  
AAAATACTTTTTGAAAATAGTTTCATTTCAATTCAGGAAAAAGGACAGAGAGCCCTGCTTTGTAATGGATGGAGTT  
AGTCTTTAGCTTCCATTGTGCACCCTAAATGAAACATAGTGTA AACGAAGCAGTTTTCTATGCAGCAAGTAAAGAG  
TGAAAACAACACACTAATGGAGATAAAATGCAAAGAACCGGGATATATAGTAACAATTCCAATTGTAAGTGTGAA  
AAAACAAATATACATATATGTGAGTTGTGCTTGTATTTCCTACTGGTTTGATTGTACAGGATAAAAAACAATA  
GTCTGTCCGTATTGGCCACAGTTTCATTCATCATTGTGTTAGTGACCCAATCTAGGAATTAATCATCAGGGTTTGA  
CAGCAAAATCCATCGGCTCAATACACCAGACATTAGCTGGAAAGTGAGGTACAAGTAGGTCATGTCCTTTGGTTTC  
TTCTCTGAGTCTGTTATATGGGCGTCTGTCAATTGTTGTTATTGTTGTTGTTGTTTAAAATTTGAAATATT  
GAATGCAAAGCAAGTGGCAGGAGCCCAACAGGTCTTTCATTCTTACTTTCTCCTTCCATCACTCTCCAATTCCTC  
CAATCCCCAGCTTTCATTCAAACATAAAGAAAACAATGTGAAAATAAGACTCCTTCATCATCTTTACTTTGTGCTTGCA  
TGTTGGCTGTAATCATCTTGAAAACATTA AAAATCAGGCTAAGATTCTGCCTATGTTTGATAGGGTTTCATTGCTGT  
GAAGAGACACCATGACTCAGGCAACTCTTATAAAGGAAAATTTAATAGAGGTTGTCTTACAGTTT TAGAGGGTCA  
GGTCAGTACATTATTATCATGGTGGGAAGCATGGCAACATCCAGGTAGAAGGGGTGATGTAGAAGGAAAGAAGT  
TTTCTATATCTTAATCTGAAAGCATAACAGGAGGAAGCTTGTGGCCAAAGCAGCAAGGAAAAGAATCTCTCTTCATC  
ACTGGGCAGAGTTTGAGCACTAGATAAAAGCCAGCCTACACAATGATCAAGGCCACATCTGCTAATAGTGCCACTT  
CCCATGGGCCAAGGATATTCTAATCATCAAACCTGCTACATACCTGCAAACACTCCTGTATGCATGTATGCACACACA  
CACAAAGACACACACACAAACACACACACACTTTTCATGCCTATTGCACGTGATATTGCATAAAAATATATTTG  
TTTATTTACTCATATATTTATTTTTACTTACTTGCTTGCTTGCTTATTACTTACTTATTTACTTATTTACTTACTTACTT  
AGTTTTAAATGTTTTGCTGAAGA ACTTTGTACATAAACATAATGAGTTTGAGTAAATCCATCCCCATCTTCTCCTCCT  
TGAATTGCTCTCCATTTCTCCTGTATCACTTTTAGCTTTAATCCATGCACATTTTAATAAAGACCACTGAGTGAATTT  
AGTGCTGACTACATATGTGGGGTTAGGGAAACACATCCACTGGAACATGGGCAGCCTCTGAGGAGCCAAATCTAT  
GAAGAAA ACTGGCCCTCACACCTGCAGCCACTAATTGCCAATTTTTGGGGTGA AATTTCTCTGCTCCCCCATCTA  
TTCTTCAAGAACTGTGAGACAGAAAATTTAAAAAAAAGGTGTTGAGATCTGCTTAGAAAGGACTTTAATCTCAGG  
ATATGGGAATCAAACCAGGTAGAGATGAATTCAGGGAAGAAACAGGGAGGAATTGGAAAGTACAAATAAGAA  
TTTGAATGTACAGATTGTAATCCTGTCTCTGGGAGTAATAATCAAGATACTTTGAAAGGAACAATCAAGCCATGT  
TTAAAAGACTGGACACACCATTGGCATATGTTATATAAATCAGTAAAAATAATTA AAAATGTCTCATTAAAATTCA  
CAACAGTCCCCTTAAGTTTTTCTTCTGGTTTTCTTCTTCAAATATCTTATTGAATCTGAAGTGATGGCTCAGCATTT  
TGAACACTGGCAGCTCATGCACAGCATACTTGGACTTGCCACATTTCCATTGGCTGTTTACAACTTCTTCTATTTT  
AGTAACCACAGGGAATCCACACTCCCCCTCCCATGAGACAATGTATCCATTCTATACAGAGAATTCAAAATAAAC  
AAAATCTCTTCAATCTGTCTACCAATCATACTTAGGTCCAATGCTTGGGTGCTTTCTGTTTCAGGCTCACAATGAT  
CAATGGTATATACTTTCTAGGTTGTATAACTGCACCTTCTTCTACAGGAACCTTTCCTCAGATTCTGTCCTCATC  
AAGAATCCCATCTAATACCATCAGATACTTCTATGCATCAGAGGGAACAAGGTCTAGCTGTGTGCCTTG CAGGTTG  
GGTAGAGCACTGTCAATATCCCTTCTCCTCCAGCAAACCTCTCAAGGCTCACAACGGTTGTCTCCAGAATAAAAT

CTGATTGCCTAAGAGAAGGAGCAAATCATCTCTGCTTGCTCTAATGTCTAAATGACATTGCAGATTAAGAAAAAC  
ATGGAGCTTCCCTAAGATTCTCAGTCCGGAAGCATTGGACAATCCACTTTTCATAGGGTCCAAAATTGTTTGAA  
TTCTACAGACCAATGAATTGTCCCATTAGAAGCCAACTTTCCAGCAGGTAGCAGCAGCTCCAAGTGTCTCCAA  
GGCAGTTAAACAAAAGCAACCTGAAGAGGCAGGTGAAATGCTCCTGGTCCCACCAAGGTGACTTTGGTTTCTGGT  
GGGAGGGGGCAATTACATGCTGTGAGAACTCTGTTCTGTTGATGTGCTCACCCACAAAACACTCCTCTGGAAAG  
ACCAGGAATGAGTTCCTCTTCCAAAATCCCTCCTCTTGCATGTGGTGTTCATTCCATGGGTGTGGGGAGTAGGCTCT  
ATTCCTGGGTACTCTGTTTCTAAATGAGGTGACACACAGTGATCACTCTCTCTATCTTTCACAGATGATTGAGAC  
TCCTAATCTAGACATTATTTATTTATTTTCAATCTGCGAAGGCAGATATGGTTGTTTGCTAACATTACAGTTT  
GCATGGACTTCATATATGTAATACATCAGAGGACAGAAGAGGATACAGCAGCATATGCTGCTGGAATTACAGG  
GAGGATGAGAAAGAAAGGGGGGGCAGGGAGTGAGAGGGAAAGAGAGAAACACAGACTGAGACTGAGATACAT  
GGAGATAGCAATACAGAGAGTGGGAAAGTTAGAAGGAAAGAGAGAGAGGCAGAGAGACAGAGAGACAGAGAG  
ACAGATAGAGAGACAGAGAAACAGTCACAATGTAATTGCTGGAAATTGAAGCCACGACCTGTGTGATAGCAGCA  
AGTCTGTCCAATACATACATTGTCTCTTGTGAGATTTGGCTCCAATTTAATTGGCCAAGAAAGACCTGATGCTATGT  
ATTCTGGAGCTGACCTTTTGTATATCATCGTATTCCTGGAAACAGTTTTCACATCTAGGGAACATGACCTTTAATCAG  
TCTTGATGCATCTCACATATCCTATGCCAGACACCAAAGGAGACATATGGAAGGTTTCTGTTGTGGTCTGGTAA  
ATGCTCGCAATTCCTGACAAGAATCTCCAGAAGAATAAAGCCAATACAGTCGAAACAACCTTAGCCCTGTTTCAGAG  
TGAGATACCTGCCTTCTAATGCTTCTCAGTACAGCTTATATAGTGTATTAGCTTACTCTTGGTTCAGAATTCACCAT  
AGATCACAAACATCCTATTAGATTTCTCTCTTTATCAATTTTTCTTGCTGTAGTGGTGGTGATTTTTAAGAGA  
GCCTTATAAGAATTAATTTACTCTTAGATGAATTTGGACATTTTGGAAAGATTGTATTCTACACCTTTTTCGCTC  
ATGAGAAAATGGGGAGGTGGTACATGGCTTAGAGTATAAGATCATTGGCCCTGTGCACAGGTTACAGGATTCAA  
TTACCAGGGCCCATCTTGTGTTGTCACAGCCACAGGTAAGTGCTGTTGCAGGGGATCTAATACTATCTAACTTCTGAT  
CTCTACACGGTCCAGTTTGTGACAGGCAGCAGACACCCCTTCAGGTAAAACATTATAAAATAGAAAATATG  
AAAATTCTACAGTTTAAACAATTGCCATATAAACTTGATTTCAAATGATCACACATACTATTAGGAGAGGACCTCA  
AATGTGGATGTAGGTCAAATTTTGTATATTTGATACTTATTTTTCTTTCTTTTCTGTTTTACACCACCTAGGACC  
CCACATCCAATGACCTGGAGGAGAGTAAGCCAGAGTCTTCCATAGTCTTTGCTTCAGTTCCTGTCTCCAATTACC  
AGCTCTGATTAAGGTGTTGTCCAGACTTCCCTAGATAACACAGTTTAAAACCTGAAAGTTGAAAACAGAAAAGAAC  
CATTACATCATTGGTAGATTTGGGTCCCAATTTTACCTCATTGAAATCAAGACAGGACTGTATGCTTGAATAAT  
GTTATCTGCCTGTGCTTAAACGTCTGACTAAAAAATCTTTGTTCAAACAGTGCAGTACTGATGAGCATCAGAC  
AGTTACATAGCAATTGTTGCCCTATGAATTTGGATACATCTCTGATTATATTGAAGTTCAAATTCATTAATGGTTT  
TAGTAGTAGGTAGACAGGCACCTAGTGTGATGTAAAACAAATCCACAGTAGATCAGTTCTAAAACACTACATTATT  
CTGCATGATATCTCAGCACTAATGAATAGGCAGCTGCACAAGCAAAAAGAGGAAAAGGAAGAAACACAGGCA  
GACACAGATGCAGAGTTGAGAAACAGGCTGAGATAGAGAATGAAGAAGGAGAAAAGGAAGGGCAGGCAGAG  
TCACAGGGACAGTCAAAGGGAGATTCAGAATCAGAGACAGAGTCAGAATGTGTGGTGTGCATGTACCTAGTGTG  
TGTCTTTCTAATTTTTAGACCTTTTAGGAAGTTACATTAACCTCAAGTGTCTGAGAGATGGAGTGATTGGTTGCAAC  
AAATTTCTCAGATTACAACAGTATAACCAAGACATGGTTTCTGTCTAATTGGCCACCCAGACCCAAGGAATACTTAT  
AATAGGAGAGATCCCAGGCTAATGGTTTTCTTTCTTATAATAAGTCTGCTTCTCCAGTCACAGAATAAAAGGAAA  
TTATGATTCATTGGAAGAACACATAAATGGCTCCAGAACTCAGCCAAGTCTATTAAGATATATATATTATCACA  
AAGCTCTCACACAACCTTTTAAAAATCCTCTACTGGATTCATCTTCTAAGTATACACTGTATGTTATGTATAGTATAT  
CATAAAATACTAAATAGGAATATCTAGCTATGTACTGAATGTATACTGTGAGGAGCTGCCCTTCAATCTCCATT  
ACAAGATGGCGCTGACATCCGTTGTTCTAACTGGTAAAGAAATAGTCTGTGTATGTGCTGGGCTATTTTTCCATTCT  
TTGTGCCCTTCTGTTCTGTGGCGTCATATGGGCTGATAGTGAGCAGCCCTTAGGGTGAATATGTCTCTAACACTT  
CTTGTGGTCTATTTAAGGACCGAGTTTCTGTGTTCTAAGCCTCCTCGCCAAAAGCTAATCATCTTTCTTGTAGAT

GGATTAAAGCTATGCTGCAGAAAGATCTGAGTGTGCCTGTGTGTGTGTGTTATCGACGGTGAGACTCTTTATCAT  
CACAAACACAGTATACTGAATGCACAAAGCATTAGTACTGTAECTCCATGGATAAATCATGTTTCATGAAGTAACAC  
TAACAGAGATTTACACACAATATTTGCATTTTCATTTGTGTTCCCGAGATGAAAATTATTTTCATCAACACACATGGC  
ACTGCATAGAACAGGTATGACTAATATTAATAAGTAAACAGCTGACTGCAAGAAGTATAGAAATCAGAGTTAGT  
AAGACTTTGGTGGAACTACTATATTTACATACTCACAACATCCATTAGTGAAGAACTCCTGCTGCATTAACTTTGCAC  
AAGATTTATTGTCAAACTTGTACTTTTAGTCTGGTGGTTGGTGGTTGGTTACACAAGTTGGTTGTGGTTTGTAGT  
AGCCATAATTAAGGAGAAGAACAAGGAAAAAAATTAATTCAGAGATTTTCTAATTCCTCTCTAATATACCCTT  
ATTTCTGTTCTATCTAGCTTTAGGGTTATAAAAAGAAGATCCTAGAAAATATCAAACACCAACTATAAAAATGAAT  
CCTTAATTACTGTCCACCAGAAACCACCAATTGTGAAGAAATACACTTTATCTTCTTATCATAAGTTTTAAAGGACT  
CTCTCAATAGCTTCTGACTGGACTGTTCTTTTTCTTCTGTGTTCTTTTTCTTGTGTGTGTGTGTGTGTGTGTGTG  
TGTGTGTGTGTGTGTGTGTGTGTGTGTGTGTGTGTGTGTGTGCATGAGGGTGAGTGCCTGTGACTTCTGTGA  
TTAATACCTTCTGTGTTGTTAACCATTTCATATTTGCTGTGGATTTACTCACAACAAACAGATAAAGTGAATTGTGA  
GTATCTTTTTTTTTGGTGTCTGTTTTGTTTTCTTTCTGGTGGTGGTTAGCATGTATGTAATCAAACACTACCA  
TCGAGTCACATCTCTAGCTTAGACAGGGTTTTGAATTTTAACTAGTTATTTCTCTCCATATTACTGTAACATTA  
TAATGTTTTTATTGTACTCCTGATCTGTTACTGAAATTTTATTTCTATTTACTCCAAATTTATGTAGGTGCTAAGCAAC  
GTCAACCCATTGCTGATATTTTTGTCAATAAGGCAAGTTGATCAATAAATGACATTTTTTTCTGACTAGTGCCATA  
TTGTGTTTTCTGAAGACTTGATCTTATGAGCCGGAGCAGAACTTGAATGTACACTTGAGGAGGGTTTTTTTTGG  
GATTTGGAGGGTACTTCAGTGTATTAATGAATGTCAGGTGCCTGATGTTCTATCAGGGTAATGGTGCTCCTTAAG  
CTACATGTTTCATCTTTATTTTCTCTACACTTTTCATAACAATATTTTTCAGTACCACAGAGCAAATGTTACAGGTTCT  
TAGCTTTTAACTCTCAGTAAACACCAAAGTCTCAATTTGGACTTCAGTGCAGCCTCTTCTCTAAAAGCTAGTCAG  
AGGATGCTTAGTCTGTGAGCCCAATCCTTTCTTTTTATTCCAAGCATGGAGGGAAGCTGGCATTCCCTGTAAGGG  
TTTTGCAATTAGAGATTCTGGTGTGAGCAGATCTTACTGTACCCTATTGAGTTTGCTCATCTGTAATAGCAAGTG  
AAAGAGTGGTAATCAGTACCATGATGGCCAAAAGAAGTCTAGAACACCACTGCATTCTGCCCCCTGTGGGTGC  
CATCCCTGTCACATTTGAAGAGAAACAGTGCTCCTCCAGGAAGCTGCTGGGAATTGAACTGCACTCCTCTGCAT  
GCTGTCAGACCCAGCCTCAGGTCTGGACTGACTCTCCTAAGGATAGTCACTTACCCTCCTGGCCCCAGTCCCTAA  
TTCTCTCTCAGTTCTCCACAAAACAGGAGACTCTCTTATTTTTGTGCCAAATGATGCCAGTTTCATTTCAAATATC  
CTGATAAACTAACTGGTTGGGTCTTAAAATAATTTCTTTCTCTCAAACACCTATTTATCAGGAAAAGTGTGAGTGA  
GAATGGCTGAGACATCTAGTCTGGGCGAGTTCCCATGATTAAGGGCAGGGAATATGAAGATAAGGCCAACTTAT  
TAATATACTTCAAAGTCTAGTTTTAATTGGCATCTCTAATGCTGTGCAGAAGAAATGTGAGATTGTGAGGTGACTT  
CACAGATTAATATAAGAGGTGAGTCTAGAAAATCAGGAGCTGTCTATTGAGAACAGCACTGGACCATGGCCCTCC  
TTTGAGGATTTACACTTAAAGCTGAGATAAACTGTAAAAAATATGTCTTTCTGAAATTTATGCCATGGAACGTC  
CACATAATATCTTAGTTCATTTGTGTGATGTTTTATACATGGCTGTAAATGCTTTTATGTTAACCTGTGTGTGCTAG  
TAAGTGTTCCTTCTAACATGAAGCTAAAGTACCTGGGAAGAGGGAACCTCAAATTGGATCTGTCTACATTAG  
ATGAGGCTATAGCCATGTTTATTTGTTTTCTTAGAAATTTTCTTTAAATTTCCATCTTATGTGACCTGAAAGTATCC  
ATCTCCCTGTTTATCCTCCTACCATCGAACTCAGAGACACAGTGAACCTAACAGAAGTTATGGGCCAAATGAATTTA  
ACAGATACCTATAGAACATCACCCAAAACAAGAACACACATAATATGCACTCATTCTTAAGTGTATATTAGGCAA  
AAAAAAAAAACATGGAATACCCATGATACAATTCATTGATACTATCCATTATCTCTACCTATGGTCAGGATTATTTT  
CTGATTTTTCTTTGTATAGATTCTGATTCTGAAGGAGAGAGCTCGATAAAGGCATCCTCTTAAATCTTTAATTCTC  
TGAGTCTCTACTCTCTGTGCATTGTCCAGTTGTGCTTTCTGTGATTATTACCAGTTTTGTAGGAACTCACCTCTG  
ATGAAGGCTGAGGCATATATACTAACATATGGGTGGAGCCATTAGGATTCATGAGAAGTCATTTTACTGCTGTGGT  
TATTTAACAAAATTTATGATGGCAGATTTTCACTTAGTGTTTTATGACCTTTCTAGTCTCAGATCTTGGCCTGATATT  
TCCCTCCACATTTAACCTCCTATTTTATGTGCTTCTTATTCTTTATACCACTATATTCTACTCCCCTTCTTGGAA



GAGCTCCTCCTTCTTTATGGTTCCTTACTAGATAGCTCATCTCTGTTACCCTAAATGAAAAACAAACATATATAAACC  
TTACAAGCTAACTCCATACATAGGTGAAAACATTCCATTTGTGTCGTTCTGGGTCTGATTTGACTGTTGGATATTTTC  
CCTTTTTTTGTTTTTTGGTTTTTTTTGTTTTGTTTTTTTTGATACTTCAATCCTTCTTTTTAAAAAATATTTT  
ATTACGTATTTTCTCAATTACATTTCCAATGCTACACCAAAGTCCCAATACCCTCCTCCCCAGTTCCCTACCCACC  
AATCCCATTATTTTTGGCTCTGGCGTTGCCCTGACTGGGGCATATAAAGTTTGGTTGTCCAATGGGCCTCTCTT  
TCAGTGATGGCTGACTAGGTCACCTTTTGATACAAATGTAGCTAGAGTCCAGAGCTCCGTGGTACTGATAAGTTAA  
TAATGTGGTTCATCTGTAGGGTTCAGATTCTTTAGCTTCTGTGTACTTTCTCTAGTCCATTGGGAGCCCTG  
TGATCCATATAATAGCTGACTGTGAGTATCCACGTCTGTGTTGCTAGGCCCTGGCATAGTCTCACATGAGACAGC  
TGATTAACAGTTGATGGGAGAGGATCCAGTACTCAGTGAGTGGTGTATCTCTGCAAAGATGGTGATAAAATATA  
TAAGAAAGCAACCTGAGGGTAGTGTGAAAAATGAGTCAGTGTAAAGAGAACTGGCTGCTCTTTAGAAGGAC  
AGGATTAGAATCACAGAACTCAGGTGGCAGCTCACAGCCTCATGAAGCTCCAATATCAAGGGACCAAGCTCCCTCT  
TATGGACTCTGTGAACCTGGACAAAAAGGCCACAGACATTCACGCAAACAAACATTTTTATATATACATATA  
TGATATTAATAAAAAGTTAAAAGGCATTTTTAAATTTGTAAGTAGAAAAGCTGAGAAAAGTGTGTTGAGAAACA  
AGCCAATAAGCAGCCTTGCTCCATGTACCCTGCCTATAATCCTACATGGGTTCCTGCCCTGATTTCACTCAGTGATG  
GAGTGTGATGTGGAAGAATAACACAACTAATCTTTTTCAAAGAGAAAGGGAGGAGAGGGGGATTGGAATGGG  
GATTTGTTGATGGGAACTGTGAAGGAAGTTATCATTTAAATTGTAATAGATAACTAAATTAATGATGAAAAAAA  
TAAGTCTGTCAAGAACTCCAATGTGACAGTGTAAACTGCTTATCTACAACCTGCTAAACTCACATGTGCGGGGT  
GTGGGCATGCAAGTGTCTGTCTGAGCCTGCAGGCCACTTAAATCCTCAAAAACCTGTGGAGTTCAACCTGACT  
TCCTGGCACAGATGATCCCCAAAGTGTATTGGGAAGTGCTTGTGCAGGTAGCAGACACCTCAATCTTGGCCCAGG  
TACACAAATAGCCAACTAGCTGCTATGAACAGGACAAGATACTTTGAGGAAGATGTACCCACGTGTGGCTTGAG  
ATTGATGTACTGGATGGTACTCTGCAATGGTCAGAATCCAGTGTCTTTTTCCCATCATCCACAGGATACCAATAT  
GCTGTAGAATGATGAGGAGACAGAGAGGTAACCTTGCTAGCCACCACAATGCGATGTGGGAATGGGTATCCAGA  
TGGAGGAAGACCCTCATGAAACAGTGGGGAGGGGATGGGATAGAGGGTTTCTGGAAGGGTGGGAACTGAAAA  
CGGACATCATTTGAAATGTATATAAAGAAAATATACAATAAAAAAGACCAACCAAGAGTACATAGGGTGGGG  
CCCATGGCTGCAGCTTCATATGTAGCAGAGAATGGCCTATTTGGACACCAGTGAGAGGTGAAGCTCCTGTTCAAG  
AGAAGGCTCTATACCCAGTGTAAAGGAATATCAGGACTAGGAAGTAGGAGTGGGTATTTTGTGATTACTGAGA  
GGAGGGATGGCATAGTGGGTTTTAGAGGGGAAACCAGGGAAAGGGGATAAGATTTGAAATGAAAATAAAGAAA  
ATGCCTCATAAAATAAAATAAAATAAAATAAAACAAAATAGATTGAAAACAACCACCTAGACACAATAAGTTAATA  
GCAGAATAATAAATAAAGACAGTGTAGTGGTGCATACCTTTTATCCCTGCTCTTGGTAGGCAGAGGCAGGGCAGG  
CAAATTTATGAGTTCAAGGCCAGCCTGAACTCCAGATTGAATTCATGACAACCAGGGCTAAACAGAGAATCCCTG  
CCTCGAAAAAACAAAAACAATAAACAATAAAGAGAAAATGAATGACACACAGGCATACAGAAGAGGACTGGT  
CCCAAAGACAGCTCTGTCTAAATATACTAGAGCACATTGCTTCACAAAATGAATTCTGAACATGCTCTCACATAGT  
GCATTTGAATATACTTTCTAGGTTAACCCCATATGATCACAAGAAAACAAAAGGTAACAAGAAGATCAGAGTCAGAA  
GTATATCTCACACTCATGTCAAAGACAGTCTGGGAGGCACACCATGCTTCGGTTTTCAAAGTTCAATAGAGTGGTG  
CTCCACCTTTTTAATACTGCGGTTCTTCATATATACTTCTTATGCTGTGTGGTGCCCCAACCGTAAAAATATTTT  
TTGCTGCTTCATAACTGAAATGTCCTACTGATATGAATTGTAACATACATTTCTGACATACAGATAGTCTTAGACAA  
CTCCTGTGAAATTTGTACAAGGACTAGCAACCTACAGGTTGCCAACCACAGTGCCAGCAACTAGGAAAAGTACC  
AGCCCTTGATTTTTACAATGTTGCCTCCGTAACGTGGGTAGAATAGATGTGCTCTATTTTAGTGGTCTAAGCATG  
TTAGGATCTGTAACACTACCTGAAACACACATACCAAATTGGATGAGGGAGTCTATTTTTCTGCTCCTGGACCTG  
CAGGTTTGTGAGTCAATTCTAACGAAATAGAAGAGAAAGGATACTGGATGAATTCCTACTCAAAGTCTTTGGAGACA  
ACAGGGATTTTATTGGGTTCTCATGGAGAATGGGAGAGTGTGTTGCTCCATTAAGGTAAGTACTCACATCACTAT  
TTTGATGCCTTCTTCTATTTGAGTGTGCTTTGTACTTTGTCTGCTATGTGTTGTGTTCTGTGTTCTTTGTTACTAA



ACTAATATCCAACATATATAAAGAACTCAAGAAGGTGGACTTCAGAAAATCAAATAACCCCATTAATAAATGGGGC  
TCAGAACTGAACAAAGATTTCTCACCTGAGGAATACCGAATGGCAGAGAAGCACCTGAAAAAATGTTCAACATCC  
TTAATCATCAGGGAAATGCAATCAAACAACCCTGAGATTCCAATTACACCAGTCAGAATGGCTAAGATCAAAA  
ATTCAGGTGACAGCAGATGCTGGCGTGGATGTGGAGAAAGAGGAACACTCCTCCATTGTTGGTGGGATTGCAGG  
CTTGACAACCACTCTGGAAATCAGTCTGGCGGTTCTCAGAAAATTGGTCATAGTACTACCAGAGGATCCAGCAA  
TACCTCTCCAGGGCATATATCCAGAAGATGCCCAACTGGTAAGAAGGACACATGCTCCACTATGTTTCATCGCCAC  
CTTATTTATAATAGTCAGAAGCTGGAAAGAACTCAGATACCCCTCAACAGAGGAATGGATACAGAAAATGTGGTA  
CATCTACACAATGGAGTACTACTCAGCTATTAAGAATGAATTTATGAAATTCCTAGCCAAATGGATGGACCTG  
GAGGGCATCATCCTGAGTGAGGTAACACATTCACAAAGGAACTCACACAATATGTACTACTGATAAGTGGATATT  
AGCCAAAACCTAGGATACCCAAGATATAAGATAGAATTTCTAAACACATGAAACTCAAGAAAAATGAAGACTG  
AAGTGTGGACACTATTCTTCTCTTAGAAGTGGGAACAAAACCTCCCATGGAAGGAGTTACAAAGTTTGGAGCTGA  
GATGAAAGGATGGACCATGTAGAGACTGCCATATCCAGGGATTACCCCATAAATCAGCATCCAAAAGCTGACACC  
ATTGCATACACTAGCAAGATTTTATCGAAAGGACCCAGATGTAGCTGTCTTGTGAGACTATGCGGGGCCTAGCA  
AACACAGATGTGGATGCTCACAGTCAGCTAATGGATGGATCACAGAGCTCCCAATGGAGGAGTTAGATAAAGTAC  
CCAGGGAGCTAAAGGGATCTGCAACCCTATAGGTGGAACAACATTATGAACTAACAGTACCCCGGAGCTCTTGA  
CTTAGCTGCATATGTATCAAAGATGTCCTAGTCAGCCATCACTGGAAAGAGAGGCCATTGGACAAGCAAACCT  
TTATATGCCCCAGTACAGGGGAATGCCAGAGCCAAAAGGGGGAGTGGGTGGTTAGGGGAGTAGGGGTGGGTG  
GGTATGGGGGACTTTTGGTATAGCATTGAAATGTAATGAGCTAAATACCTAATAAAAAAATGGGAAAAAATA  
GAAAAAGAAGAAAACACGGCATTAACTGGAGGCTTGCTTACATTTTCAGAAGATTGTACAATCATCAGAGAGG  
GACCCCATCACTGGAGCAATAGAGAACTATTGATCCTTAGGCAAAGAGATAGATTCTGCCATTGCATTGGCTTCTT  
GAAAACCTCAAACCCATCCTTGTTGATACGCCCACTTTCTCCAATGAAGCCACACCTTCTTATTCTTCTAAATTTA  
AACTCACTGCCACTTCTGGTGACTAAATATTCATATATATGTGTCTATACGTGACTTTATTATTCAAACCACTT  
TTCCCATGGCTCGTTCAGCTATTTTTTTTTTAAATACAGCCTAAAAGGCTCCCATTTACTAAGGACTACTGATGAGC  
TTAGCCACAGTGATGGGCCCTCCACATCAATCATTAGCCAAGAGAATATCCCATAGACTTACCTAATGAACAAGT  
AAGTGAATAGAGACTGATCTTCAATTGTTCTCTTCTTAGGTAAGTGTGGATTGTCAAATTTGAAAAAATA  
ATATCCCATCACAGTAATGTTAACTTACACCATAACCTACAAAACATTACTCAACACCATCTATTGCATTCTGCC  
CTGCATAGACACACTTCCATGTATGGCATAAGTGAAGGGTGACTACCTCCATCAGCAAGGATACTCAATAATAGGT  
GACATGAGCTGAATAATCCTATAGCCTCACAAACCCGAAATCTACTGTGTATTACACTTACTGGGGGACTTGCCA  
ATCTGTCCAATTTTATGCCACCAAAGCTATGACAAAAGACTCCTCATCAAGAAATCTAATGAATTTTACCTGATTT  
TTTCTCCTGAGGCAACTGAGTATTATCCCTTCATGCTTATATTGGTGTGGATTGATTGATTGATTGATTGATTG  
TTACAGCTACATCACAGGAGGTATGACAAATACCATCTCCCATGAGTTGGCCAAACCTTTTCAGCAGCTTTTTTGT  
AGTATCCTTTCTATAATAAAAAATACATTGATTTCTTTATTTTAAAGTGTGTAATTTAATGATTCTAACACATTTT  
CTCCTTCCATTTCCCTCATTTTCTGCTACTTCATATGATATTGCAATCTATTAATAACAGTAATGAATACAGTGGA  
AAAAACAGTGTGGGAAGAATCAAAGTTCTTTATTACAAAGACAACAGATACTGGCAGAATCTTCCAGGTACAA  
CTATTTGGTAACTTTGGTCTAATGTTAGCATGATTCTTCTAGAAAAAGCTTAAAGAATTAAGGCATGGTTACAAT  
GGACCAGAAAAGTCAGTATCACTAGTGAGACACACTCATGTAAATAATTTTTCATCACTGTTCCGATATGCCTAGCA  
ACAAGGAAAACAGGTCCATAGTCACAAGAGTATGAAAGGGGCATGAAGCAGAACAGTTGTCCAACCTTATTATTAC  
CCAGTAAGCATCAACACAGGAAGTGACCAAAGACAATAAATAACTTCCAAGACATGTTCCCAATATCCAAGTTCT  
TTACAAGTGTCTCACCCCTTCAATGCACACCCATCAATCAATTAACTCATTGATTAAGCCCTCAGGGTCCAATCACT  
TTTTCAGATTGTGTATAGTGTCTATCTTTGAACATTGTACTTGGGGCCAAAACCTTTCATCAAAGAACCACGACTGAC  
ATTGCAAACCCATTTACCACACAATTCTTTATGTTACAAAAGTGATAGGATCTATCTGTCTCTTTGAGGATATCTC  
TGTATAGCAGTTACAAAAGCAAACGTCCAGGCCAACAGAATCATCACCTCCATGAGGTATTTTAAATATGAGTT

CAAGAAGAAGGAAAGTGCAATGAAAGTTAAGGTTCTTGATCCCACATCCCTCTATTTTAAAGCCATAGGGTGGACC  
CAGAAGTTTAGGTCAAAAGTGAAATTTACCTATACTACAACCAACTGTGATGATTTCTAGCCATCTCCAGTTTCA  
GTGTGGTATTTAGTCCCACCATCTGCATCACAGCATATTGCCTAGTGTGAAATAGTGCCAGCAGTTGATTGCAAAC  
CCCCTATGCGTTGACTTGGATGTAAATGAGACATCTATAATATAGACACACTTGTACACACACACATACTCACAG  
AAAGAGGCAAGAAGTAGAGGAGCTGAGTCTTAGGATCCCTCAATGAAGAGATAGTGGAAATCTTGTAAGGTAGA  
GAGGTCATTGAGAACTGTATGTCTCTATCTGCACAAAATCAGGCCAGTCTGCCTTCCATCAATAAGTGGTAGGTT  
CTCACTATCAATCATCCCCATCTGAGAATGTATGGACAGTTAATGAAAGATGGAGAGTCAGTTTTTCATCAAAGGTA  
TGCCCTTTGAAGGTTATAGGTTGGCCAGGCACTACTGGTAGCTCCATGTCCAAGAGTTTATGGGCAACACAATTGA  
TTTGAATGGGTTTTATCAAAGGGAGAAAAGGAGACATGAAGTTGGAAGGAGGATTAAGGTGGGAATGGATCTG  
GTTTTGGTCCGGGAGGAGTTATTAAGAGAACTGGAAAATAAATCCATCAAATACATTGTATGAATTTCTCAAGG  
AATTAATGAATGTAGTTCTTAATATATAATGTCTGTACTGAACATATACAGACGACTTATATTTCCATTTCTAAATA  
ACAAACCTTGTGTAGCAGTTTTCATTACATTAAGGGCAAAGTAATCCAGAGATTATTTAAATAAAGAAGGATCA  
GAGGTTATGGCCAGGGCAAATTCATGCCTGTGTTTATTTACTTACAACACCAGTGCTTAGGATTTTGGGAGCGG  
CAGAGACAGGAAGATGACTGTAGCTTCTGAAAGCCAGCCTCAATATTAGCTCAGCAAGAAACCCTGTAGAAAGG  
GGATAAATTAGGGAGTGAAGGAGCAAATCACACTATACCCTTCGCTACCTTTGAACTTACCTGTACAGATCTGTGT  
GCAGACACACATGAATATAAATAAAATATAACAAGAGCTTATCTTTCATAGCTTATAAGCAGTGTTCTGTTATCTTAG  
CCTAGAATCCTGAGGACTTATATCATTAGAGTTCCTGAAGCAAATCCCCAGATATAGCGATGGGTATATCTTGTA  
CTATGCAAAGAGACCTCAGTTAAATGTATGTCAGTGACTCCAAAACAGCTTTTCTTCTACCTTTCTTATATGGCA  
CAGAACGACCTGTAATAATTTAAATATGAAAACAAAGCTTTTTTACGAATTTAGGCTTGTGTTAAAATAATATTTA  
TAACATTTTACTAAATGGAAGGGAAATCTTCAGCTCCCAGGAACAATCCTGTAGGCTTCTGTTTTGTCCATTATGA  
ACAAAATTAATTGCACATTGACAATTCACCGTTTTAACTAAATCAGGATGAAGGGATATGTTTCCATACAAATAA  
GTAATGCCAATGTGATTAATCAAGTAGAAATGTGGCAGGGTTAGGATGCCTTTGGCTGATGTGACAATGATGACT  
GATTAGTCTCTTGTATGCAAATAACCCTAACCTCTAAGAAAAGAAAAGTAATGATATAGAATATTCCAAGAAGTG  
GCATGGACAATTACTTGTATTTCAATTTCTTTACATACTTTATTAGTTTGAATAATTGTGGCTCACAGAAGATCA  
AATATTCAAAGGAGTTAGTTTTCTAGGTGGTGGGATGTTTAGAAAGAATTAGGATTTGTGTTTTTCATTAAGTGA  
TTTGGCATTGGGCTTGAATATCAAACACCCTTTGGCATATCAAAAACCTCTCTCATTCTTTCTTCTCTCTCTCT  
CTCTCTGCACTCTCTCTCTCTCATGTTTTAAGCCATCCATCCAGTGGTTGACATCTAGAATAATCCATCGCAT  
GTTTATTGCACACAGTAAGGCAATCAACATTTATGATATGGATGTGAAATGGTCCTTCTTGCATTTTTTTTTTTTA  
GTTAACTCAACCTGGGAATATAGAACCAGATAAAGAAGTGCCTCCATCACATTGGTCAGTTGCCACACCTGTAA  
GGAATGATCTTTTTGGATGGCTGATGTTGAAGGGTCTAGCCACTATGGGTAGTGTCAACATCTATGAAAAAAT  
ATACAAGGTGTGGTGGTTATCGTGTAAGGGCCTGAAATTAATTTTTCTGGAAGAATAAGATCTATATGGCATGA  
AAAATTAAGTGCCTGATAATTTGTAAGTAAATCCATACTTACCAGCATTCAATATTTTGTCTACCCATATTTCAA  
AGTAAAATTATCAAATCTATTTACCCTGTTTTACTGCATTTAATCTATTAATTAATTAATTAATTAATTAATTA  
ATTTTTAAAGGCCTTTAAACATGACTGGTTGATATTGTGTTAACTTCATCACAACCTTGTAAAGCAGGAACAAGAG  
CTAGATTGCCTTCTCATTTTCAAAGAATCCATGATTCACGGTTGCAAATAGCTTCAATACAAGGTAACCTTAAACCCTG  
TAAAATTCCTGCTTTGTTGAATAAAATATTTATTGCTCTAACTTTGGGTTTTTATAAACAGAAATTTTATGATGTCTAT  
CCAATGTGCTGCCTCAAAGAGTCTGGCACAATTTCTGACACTAAGAACAGTTTAAAGATAACCAGGGAAAGGTTG  
GAACAGGGAAAATAACCACCAAGGATGTTGGTGAGTCAGAAACTGAAGGCTTTCACAGGAGGAAAATAAAAAACA  
AAAACAAAACAAACAATCAACAATGAATAAACAGAAACCAACCACCAAATGATAAAAACAATACAGGAGTGA  
ATTACTTGGGCAGAATGTGACTCAAGTCATCAGGACATTTAGTAGGGATTATATTTTGTATTTTGGAGAAGGCCAT  
ATGAAAAGGTAAAGCCTAGATGGTTAATGTCTCTGGTGAATTAGGGAAGGAACCAGCATGAGTGGTGTCTATC  
ATGCAAGCTGAACTAGGTGATGTCACAGAGCACTGGCCATAGATTGCACATCTATCCACTTGGAGGCACTAGAAT



GATCCTTCTGCTTTGACCAAAGGATTTCAATCTACTGACTCTGAGTTACCAGGGGCCTCAGATCTCATTTCCTCA  
AGTGGTCATCAGATATCCCTTTCTGACCAATAATGACCTTGAATGTTCTCCTCTGATGCAGACACTTAGACACCCC  
CCCTCCAATTTAACTCCCAAATGGACCTCCAGACCACCAAGCTTAAAGTACCTGAGCCGAACATTAAGAAGTAC  
AGCCGAGAACAAAAGCTCATTTCCTCAAGGCAGAACTAAAATGATGTTCTCCTCACCATTACATCTAGACCCAG  
GAGATGAACATATGCCTGAGAAGAAGAACTAGTGGAAGTGTGAGCCAGGTTTTGATGAGTGCTCAGACTGCT  
TCCTGATCCGGCACCACATTTACTATAGTGGACAGATGCTCTAGTCTCTGATGAGGAGTTGCTAGCTGTTAGGAAA  
AACCTGGAATGGGCTCCACTGCATGAGGTAGGCTGTGCTTTGATCTCACGTCAAGGAAAGAACATGCAAATTTG  
AACTCTACCCAACCAACATACTAGTTTACCTGTACAAAGGGGATTTACATTTCCAATTTCTCACAAAGATACCCCTC  
TTACCATTGAGTTCCTATCTATTTTTCATGGCTCATAGGGTCTCATTCTTCCAATGTCCATTACTGGCTCACTTCTG  
ACCACTAGCCATACATCTCTGATTAGTGTGGGGTGTCTCGGTATGACACTAAGGCCAACAAATAGTGCTACAT  
GCCATTTCTGAATAATTGGATCTTAAATTCCACCATTGTCCAAGTGTACTTCTGAAAGACTTTTTCTATTACATGGGG  
TCTCTACAGTAGCATCTTTGTTTCATCAGGCCTCTAGTTGTACCTTCTGGCCTAAGCAGGTCTTATACTTCACTTAAAG  
TGATGCCAAATTTACACAATGTAGACAAAGATGCATTGAGCATTCTCATACTCATTAAATAACATTCCTCCCCTCAT  
TTTTGAAGTCTCCAGAGCAGCAAAGAGAGTGGGGAGTAGAACTCATCATCTTTAGGTCACTCAGCATCGATGGGT  
TGTTTGCAACCTTAGTATACAGACATGGATGGTTGAACACAACTGTGAGGCTGATAAAGAAGTACATCTACT  
AACGTCCTTGGAACCATGTTGAGATTGCTGCACATCCTCCTGAAGATGCCACAGATGACATGGTTCCTTGTGATTGT  
TGTTCTCTTGTGTTGCTGTTTTCTTTAACTTTTGAAGAGGATACTTTATTAGTCTGTTGCTATGTTAGTCATCT  
CCTGGCATTAGAAACCAACATCCCACTGTTTAAATGTTTTACATTTCTACTCTTTTTGGAAAACACAACGTATGCGC  
ATCATTTTTCTATTGTTTCAAAGACATAACCACTATGTAATCAACTTTACAATTGTAACATTTTTGACCAATATTCA  
CATGAATATAAATTTTATGTGTAATTTCTTCTGTGCTGTGTTATTTTTACCAGATGACAGTTTCATTTGAGGTCA  
TTTGAAGATCGTTCCTTACTATGTGTCTTTAAAAGATATATTTGGAGCTGAGGGGTATGGCTGAATATCTTCAGC  
ACAATAACACCTTCTATAACATTACTATCTAGTGGATTATAAGTATCAGGTTGTACACAGTAGTAACTAAAATAAT  
GGACAATTTGAGAAAGATTTTAGGGTGAATCTCTCATAATATACAGAAAAAAGGAAATCCTAGATATTAATCAA  
ATCTATGCACACCAATGAACATTGTGGGTTTTGTGGGTTTTGTTGTATATGTCTTTGTAGTTCGAATGTCCAACCT  
TTATGTCTTAATTGATGATTGTAACAGTGTCTCAGAGTGTGTGCATGTGAATTAAGGGCACCATGTCTTTAGTGT  
TAGATTAATTTACATATAAATTATCTGTCTATCTGTCATCTATGTATGTATGTATGTATGTATGTATGTATGTATGTA  
TGAAGTAATGATTGAATGTATTTATATAGATATGTATGCAACTATTTCTCTATCATCTACCTATCTCTCTCTTTCTA  
TTTCTCTCACCTCTTTCTCTGTTTATCTCTTATGCATGAATATATGCATGCATGTAGCTAGGTAGGTGTGGTATTTTT  
AATGTAATTGGTTCATCGGCCATAGGCTGTATTAGGATGATTAACCTTGTGGACTAGGTGTTTCTTGTGGGA  
GGAAGGGTGTCACTGGAGGAGGTGGGTGGTCTCACACATGTTCAAGTTAGTTATGCACAGTAGGGCTCTGTGTGT  
TTGCTGTCTCTGTCTTTCCAAGAGTAGCTGTGATAGAGTGTTCAGTGATTCAAGGAGGGGATGTTGGTTAGATG  
GCATATAAAGCAGGCAAGACACATTTACATACATGGTAGAAGAAGCAAGCTTTAAGAAGCACAAACAATCACACA  
CACACACACACACACACACACACACACACACACACATTTGTTGGACAGTGCAAAGCTTCAACCACTTTAAATATA  
TACTCACATTTGGTGGATGGAACAAAGCACCAACTTTATTTTTCTCACACTGCTTATATACTGACAACTTTTCA  
ATTAGTATAAATTTATACTGGTACTTTCTATTTTCTTCTAGTGAATAATTATGAGTATGTATAAGGAGAAGCATCT  
TCTCACTATACTTTATGATGAGCTATTTATAAATTATGTTTATAAATATCCAATATTATCCCAAGAACCAACACGC  
ATTTCTAACTAAAAAATTGTTATAGATTAACAAGTTGAAGCAAGTAGGGTAATTTTTATTTTCAAGCCAGTTTCTCT  
ACTGGTAGACTGAAATTTGCCATTATACAGAAAGGATTAGTTTTTATCTATCTCAAAAAATAATCCTTCAAAAAATCT  
TAAAAGAATCACAAAATAAATTTTATATAAAAACTATCATCCCTTTCTACTTTGAATCCTCAGGGTGCACATCTG  
TTCATTAACCATGTTTTTCTTAAATCATATCAGGAATCAGAATGAGGAAATAGGTACAAGGAAATAATAATCATCTG  
AACACCAGCCTGACTTTGAAAAAAGGCATGTTTTTGTAGTAATTCTTTCCAAGATTGTGGTTGAAGTATTA  
ATCGCATCAGCTGCAATCCTTGAGAAAGTTCGATCTAAATAACTGTGGGTGGCAATGATATTGCCAGTGAGG

GGCTGGAACCCCTTAAATTTTCATACAATCCATAGATTATGAGGAATGTGATGTGAGGGCAGCAAGTAGGGAG  
AAACTCTACAACAGCATGAGTGGTAACAGAGTGGTACCAGCTTTTAAGTGTTAAGAGTGGTAAGAGTTTTAAGT  
GGTTCACCTACCAAGAATCCATCAAAGCCCTGTATTTGGAGGTAATAATGTACATTCTGGGGAGCCCTCTGCCA  
TGCTTAATATTCTAATAAAATTAATAATAATTAATTTCTCATTTAATAGACCCTGCTTACAGTCCCCCAAATTTA  
CTCCCCACGGTCTTTTACTACCTCCCATCCTCTCCAGTTCCTCCCCCTTCGGTCATCATTCAAAATACTTCTCTTT  
CAAATATCTCTTCTGCATTTCTTATTCAACCCCATCTCCCTCCACCATGCCACCTGATCTTCTCTTCTTGCCACCT  
TTGTACACTAATAAATCCATTCTATTTCTCCATACCATGGGCATCCATGTATGCACCCAAGTCTTCTCTATACTA  
ACTTCACTGGATCTACAGATTGTAGACAGGCCATCACATATGTAATGTTGAATGTCTTAATGTTTCTATTGCTGTCA  
TCAAAACTATAACCCAAGCACAAGTTGGGGAGGGTAGGACTTATTTGCAATGTGGGTACTGTAAAGAAAAGAGA  
CACTGAGCAAGAGACTGCCCAAGAAAGAGACAGATACCAGACCCTAAGTCTTTTCTCAGAGGATGATGACT  
ACATGATATGGGGAACAGACACCCTACGTGACACTAGGGTAACCCAGCTGTGGAAGAGACCCTTATGGCTTCCC  
TTCATGATATCAGAGCAGAGTTTTAGTCTGACAGAGCCACTGGAGAAATTGAGGACCCAGAAATCCTTAGTATT  
CGGGGCTACTGGTCAGAAACCATACTCTTAGACCACTGATAAGAAAGTTAATCTATGAATAAGCCAAGTAACTCAT  
TCCTCCCTCATCATTCTCAAGCCCCACCACATTGTTGTGGAGAGACATACTAGCATATTTAAAATCCCAATAAGC  
TGCTCTTTGGAAGGAACCTCAATCCCTTGGCAAGCTGTCCCTATAAATTTAACTTTAAAATTAGAAGAAGATA  
GATTACATGAGTCTCAAGCCCCGTCAAGAAAAGTACTAGAATGGACCTATTTAGAGAGATATCCAACAGCCTGGG  
CAGAGACTGGTGGTATAATTGAGACAAAATGGTGTCCCCCATCATTGTGACATTGAAATCTGGTGAGATTCTT  
TTCGGGGTACAACAATACACCATGAGCAAAGAGGCCAGTGAGGGCATCAGACCTCACCTTCAAGGGCTCTTAGAA  
CTAGGCGTGTGGTCTTTGTGAGTCTTCTGGAATACTCTGTTGCTACCAGTTAAAAGCAAGGCTTTGCCACCT  
GGCACTCCCTAATAATCCCCCTTACTAAAGAGAATGGGACTTTCTCATGGACCAATATATGGGGAGGCCTTTAA  
AAAGATTAATAAATCGTGCTTAGTGCCTCAGCCCTAGTCTGACAGATGTGACCGAGCCATTCACTCTCTATTTAGA  
TAAAAGAGCAGAAATAGTGAGATAGGTCTGAACTAAGCTCTGGGGACATAGAAAAGACTTGTGGCCTACTTGTA  
AAAAAAAAAAAAATAGACCAATGCCAGTGGATGGCCGTCTTTCTTAAAAGATATCAATACTTCTCAAAGATGCTG  
ACAACTGACTCTAGGTCAAGGAAGTATAGTAGTAGCCCCCTCTGCCCCATGCCTTAGAAAGCATTGTTAGGCA  
GCTGCCAGATTGCTGGATGACTAATGCTCACAGGACCCATTATCAGAGCCTCTTTCTGACTGAGAGAGTGTAGAGA  
GAGTGTAAATTTGACCCCTGCTATCCTGAATCCTTCCACCTTGTGCTGCTGAAGCTGACAACCTCCCTACCAGTGAAGG  
TGTATAGACATCCTGGCAGAAGAAACCAAACTAAGAAAAGAGTCAATTGACCAGCCATGGTCAGGTTGCCCAAT  
TGGTACACAGATGGTATCAGCTTTTTGATTGAAGGTAAAAGAAAAGTGGTGCCAGCAGTGGTCAACGGAAAAGA  
AACCATCCGTGTAAGCAGCTTTACTGAAGAAATGACAGTCCAGAGAGAAGAGCTAATCACACATACCCAAGCCTT  
GCAGCTGGCCATAGAAAAGAACATCAATATCTAAACAGACAGCATGTATGCCTTTGCCACACGCATGGTAGTATCT  
GTAGAAAAGGATGCTACTCACTTCTACTGGGGAAGATATAAAAATAAAAAGGAAACCTTGAGACTATTAGAAG  
CCATACACTTTGCAAAAACTGGACATCATACTTGCATTGTACCACAAAAGTCCATGAGGCCATAGTGAAGGGA  
AATCTGATGCCTGAACTGACTGGCCTAAAAAAATAAATGAATAAAAATAAAGAACGTGAAGACCATTATAAACTCA  
AAGATGCAGGCTTTGACTATACTCCAGAAGATCAGAAATTAACAGGCAAAAATACCTGATATATGTGGGTGACTAC  
TTAGGGAGTCTTAGGACCAAGATGGTTGCTCTGCTGCCACAATAGAAAGGTAACAATATGTCTCCAATCTAA  
ACCACCTCATGCACTTGGAAATTGAGAAGGTCAAAGAAAATGTTGAGAGCTAAAAGTCAATGTTATAAGATTGC  
CAGATGTTGCCAGGGGATTGTTAATGAATGCCAAGCATGTGCCCTCACCATTGCTGGGCACCACAAGAACACCCC  
CCCCCCCCAGAAGGTGGATAAGAGTTGACTGGCTATGAGCATACTGAAAAGTAGAATTTACTGAAGTTAAACCA  
GCCAAGTACAGTAATAAATATCTATTTGTTTTTTGTAACACCTTTTCAGGCTTGGTCAAGCCTTCCCCACTAATA  
ACAAGAACACCCATGCCATGGGAAAGAAGATATTAGAGGAAAATTTCCAAGATTTGGCATCTCTAAGGTACTTTC  
ATCAGACAATGGCCCTCCTTATTGTCCAGGTAAGCCAAGGGTTAGCCAGACAATGGGGGATTCATTGGAAGAT  
ACATTGTTCTTACAGATTCCAGACTTCAGGACAGGTAGAGTGGATGAATAGAGCATTAAAAGAAACCTTGACTAAA

TGGGTTTTAGAGACCTACAGAAAAGATTATGCAGCTCTTTTTCCCTTTCCTTGTCTGAGTATGGAACACCACAGG  
GAAATTTAACTTACACCATTCAAACCTCAACTTGGGACGCCCTCCCTTAAACAGAAGCAGGTGCAATGTTTGA  
ACTTGATATTTCTTTTTCAGAACCCCTCTAGCTCACTTGAAGGCCCTACAATTGGTCAGAAAAGATGCCTTGGAAA  
TGCTGAAACACAATAAAAAACAAAAACAAAAACAAAAACAAAAACATACTAACCAGGAACCATCTTCGTGC  
CACATAAATTTCAAACAGAAGATCCTGTCCGGGTCCGGTGCCACCATTCTGGGAACTTGAACCTCAGATCAAAGG  
ATGCTCCCTGGTGTCTTGACAAGCCCTGCTGCCGCACCTCCAGCATGTAACCGCTTCTGGCCTGCCATGGCCACT  
GGCCTGGCACTGCACAGGATCCCCCTTCTCCCTCCTCCCACTGGCAAGAGTCTCTTTCGTCTCATTCAAGGGCT  
TCTGAGGTTCTCAATCTTACAAATCTAAAGCTGTGACCTCAGGTTGGCTTTATTTGGCAGCTGGGCCAGAGGTTTA  
ATTTTCTAACTTATAAAATTAGAACTATGTAAGGAGTGGGAAATGTGAGAACCCAACTTAGAGCATTCTC  
CCTGGAAGGTGAAGCCCCTGGACATTCTCAAAGCTTTTATCCCTGAGCTCTAAAATACAGCCAGAAAGAAGCTC  
TATGTTCTCTACAGCCACAAAAAGCATTTTGGTTTCTGAGCCTTACAGCTAGAGATTCGAAAATTGGAGTTTTGCC  
AAGGACATGTGGGCAGAGAAGAACAACCTCCCGACTCTCCCAACTCTCCAACTCTCCTCCCAACTCATCTCAAT  
TCCTCAGGTAGCTAAGAAAAACCCTCTTCTGTACATCTCAGAGTCATACGCCCTGCCCTGCACAGTGAAGGAG  
TTTGTCTTAGCTAGCTGATAATAAAACCTTTACAGTTTGCATCAGGTGTGGATTTCTCTCAAGTCATTTGGGTGC  
TGGCCATCTCATCTGAGGACTTTAATGGACTTGAGAGGAGGTCCATCTTCAGGGTCTTACACATGGAGACCTAAGA  
CCAAAATTCTTCAAACCTATTATGCAAAATCAAAGAGAAGGAACACTATTGAATTTGTTCTATGAAGCCAGATTAC  
AATTATATTCAAACCATACAAAACTCAATGAAGAAAGGAACTTCAGATCATTTTCCCTTATGAATATCGAAGCAA  
TAATACTCAATAAAATCACTGCAAACCAATAAAAGAATACATCAAACGATCATCCATCATGGTCAAGTAGGCTT  
CATCCCTGTGATGCAGGGATGGTTTAATATATGGAAATTTGTCAACTTAATCCACTATAGAAACAACTCAAAGAC  
GAAAACAACATGATCACCTCATTAGATGCTGAGAAAGTATTTGACAAAATACAACACCCATTTCATAATAAAGTCC  
AGGAAAGGTCAGGAATTCAGGCCCATACCTAATATATAAAAAAAAAAAGTCAGCAAACAGTAGGAAACATTA  
AACTAAAAGAAACAATCGCATTAAAATCAGGGACGAGACAAGACTGCCCACTTTCTTCATACCTATTGAATATAGT  
AGTTGAAGTCCTAACCCAGAGCAATTAGACAACAAAAGGAAAACAAATGAATACAAATTGGAAAGGAAGAAGTCA  
AAATATCACTATTTCCAGAATATATGATAGTATGTATCAGTGACCCAAAAATGCAAAAAGAGAAATCATAAACCT  
TATATACGACTTCAGTGCAGTAGGTGAATATAAAATTAACCTCAAACATATCAGTGGGCTTTCCCTACACAAAGGAA  
AAGGAGGATGAGAAAGAAATTAGGGAAAAAACACCTTCAACAATACTACAAATAATATAAAAAAGCTTTGTGTG  
ATTCTAACTTAGAAAGTGAAAGATACATATGATAAAAACTTCAAGTCTCTGAAGAAAGAAATGAAACAAGATCTCA  
GAACATGGAAAGATCTCCCATGATCATGGATTGCAAGGATTAATATAGTAAAAATGTGTGTTCTGCCAAAAGTAGT  
TTAAAGATTCAATGCAATCCCATCAAATTTCAAACCTCAATTCTTTACTGAGTTAGAAAAGGCAATTTACAAATTC  
ACTGGAATTTAAAAAAAACCCAACAACAACAACAACAAAAAACCTAGTATAAGAAAATTTCCCAACAATAA  
AAGAACCTCTTGTGGAATCACCATGCCTGAACTCAAGCTGCACTACAAAGCAATTGTGATAAAAACTACATGGTAC  
AGGTTTAGTGGTAGGCAGGTATATAATGAAATAGAAGTGAAGTCAGAAAAATAAACCCACACACCTATAGTCAC  
TTGATCTTTGACAAAGGAGCTAAAACCATCTAGTGGAAAGAAGACAGCATTTC AACAAATGGTGCTGGCTTAATT  
GGCAGTTAGCATGTAGTAGAATGTAAATTGATCTATTCTCATCCCTGTACAATGCTCAAGTCTAAGTTCGATCAAG  
GAACTGCACATAAAACCAGAGACTGAACTTATAGAAGAGAAAGTGGGGAATAGCCTGGAATACATGGGC  
AGGGGGAATATTCTTGAAAAAATAACCAGCAATATCTTGTGCTATAAGATTAATAAATGGACAAATGGGACCTCA  
TAAAATTGATAAGATTATACCCAGAAGTTCAAACCTGTAATAAGGATACATGCTTCACTATGTCCTTATGTATAATA  
ACAAGAAGCTGAAATGAACCCTGATGACTCTTTAGAGGAATGTATATAGAAAATATGGTACATTTATTTAATGA  
ATTACTACACAGCTATTA AAAACAATGAATTCATGAAATTTTTATACAAATGGATGGATCTGTATGATATCTTTCTA  
AGTGAGATAACCCAATCACAAAAATCACACATGATATCACTCATTGGTGAGTGGATATTATCCCTGAAGCTCAGA  
ATAACCAAGGTAAAATATGCAAAACCATGAACTGAAGAAGATAGACCAAAGTGTGTATAAGTACCCCACAATT  
CCCTGGGACTAAACCACCAATCAATGAAAACAACAATGGGACATATGATTCCAGCTTTCTATGTAGCAGAGGATG



GACTAGTCAGGCATCAATGAGAGGAGAGACACTTTTTCTGTAAAGATCCTATGCCCCAGTATGGGGGAATACCT  
GGGCTGGAATTGTTAGATGGTGTGTTGGGGAGATGGGGGAGAAGGGAGAGGACAGGAGATTTTTGGAGTGTA  
ACTAGAAACGGGGATAATATTTGAAATGTAAATAAGGAAAATATACAATAGAAAAAGAAAGAAATAATTTATT  
GAAGGTTTTATGAGATAAATTCATGTTTGGCAAACATATTATACGAACAATGTTTCAGGTCTTTTGTGAGGCAAAA  
TCAAAAAAGTTCTTCTTTCTCAAATATGGTGATATAGTTCCAAGAGTAGGTATATGTGCTGCTAAACCTTGATAT  
AAGAATAGATAAATATAGGTAATAATTAGAAATGAAGTATATGTAACTTAACAAGACTTCCTCCATTTTCAGGTGAC  
TAGGTAAAATCTAATGAACTGCAGGACACAATTAATACCTGACACTGGAAATGCTATACCTTCAAAGAGCCTCC  
TCTGAAACTTTTTATGTCATCGTGCTCATCATCAAAGTCCAAGTGAATAAGTAACCTTCCTTTGGTATCACCATCAAT  
TTCTTAAGTGCCATTCTTCTTAAGAACTCAGTAGTCTTAGTTAAAAACAACAATTAATAAAAAAGGAAAAAA  
AAGAACTTAGTTACCTGACTAAAAATTATCATTTAAATAATTAATAAACAACAATCAATAATTTTAGCTC  
AATGAAAGATAATTTCTTTTGTACTTAACATGTATATTTTAATCAATTGCCTTTATCAGAGAGTTCTGTATACATA  
TTCAATATGGTGATGCATATATATACTTACCCGTACCATTTTCTCCATGTATCCCATTTATCATGTCCCTCTCCCTC  
ACAACCTGTTTTAAAACTTCTTTAACTCACTTCTTTAAAAACCTCCTTTAGAACCAAAGTTATCAATCTGCCATTTCT  
CAGTTTAAAAAACAACAACAACAACAACAACAACAACAACAACAACAACAACAACAACAACAACAACAACAACAACA  
GAGCAACATCCTTTAACCTTTGAGGCATCTGAATTTGGTCTATCTCCACAGATTCTTTTTAAACAACAACAACA  
AATTCTGTTTAAACAGTTTATCTCAGTCTAAGGTATACTCACAGTTCTATCCAGAAAGATAAAGAACATGGTAACTGT  
ATATTCATATCAAAAAGATCCACCACTAAGTCTACAAAAAACAACAACAACAACAACAACAACAACAACAACAACA  
TTATATTGGAGAAATTAGGGATTTGGGGAAGCCGAGGATTTCAAACATCTGAAGATTGAAGTTAAAGGCCAGAC  
CAAGCTGGGCCAGCTGAAACTACAAAGATAGATCCCATCCTACAGAACCCTAAACTGAGAGAAAAAGCTGAACTTG  
GTGGTGCAAGTCTTTAATCCAATACATGGGAGATTGGGACAGAAGGATCTGTGGTCAGAATCCATCCCCAATGA  
CTTATCAATCTTTACAATATCTCCTCTTCTTTTTCATTATCTTCTCCTATGCCATTCTACTGTCTGCAATGTTACATC  
AGGCTATACCAAAGGAACACACCATAGAGAAGACAATGAGGAGGGACGAATCCTCAGTGTGTTTCTAAGGGATC  
CTGTACAGCACACAGGACAAGCGCCAAGGCATCTCATCCATGGCTCCCTGTTCCCTGACCCACAGTCTGCAGCTG  
GTTCTCTGATCCTATCTCCAGGCCAAAGCTTTTCTTCTTCCAAGGGTCCGAATTCTCTATGGCCCTGACCTGTTCAA  
TCCTCTCCATGAATACGGTCTCCACCTCCATTACCCCTCAGATTCCACAGGAAATGGCGATCAGGAGGCTTTTC  
CTCACTTAGTGGCCTCCTGGCCTGAGATTCCCCACCCTGTCTCACCTCGATTAAGTGTACAACAACCCTGATCAGG  
GCAGATTACTTACAGGTCATGTATGAGGAGAACAACCTTCACAACCTGCACCCTTCTGTGCTTAGCTCCTCAATGG  
CAAAAAAAAAAAAAAAAAAAAAAAGTTGTACAGGAGCCAGACCCGGACAGAAGCCTAAGAGGATCCTTTGTGATGC  
CAGCTGGAGCAAACAGGTCTACCAAAGGACTGTGCTGATTGGCTAAATACCCCTGCACATGCGTTCATGGAAT  
ACCAAGTACCAACACTTTAAAGGGAGATTTTGAAGGTGGGAATAAGCCACTGGCTTTAAGGCAAATGATTTCCA  
GTTTGTGGTTGATAATTGCTTACAACTTGAAAATCCAGAACAATATGAAACATATGAAATACAGCAAATGGCT  
CTACTTAATTTAGCTGTAGAGGCTCTTGTACGCATTTTTGGTTTTTATTTATTTATGTGCATAAACATTTAATAATG  
TGGACTTCTGCATGTACACACGCACACCAGAAGAGTCTATGCTGCCCTAAGAGTTCAGAAGGGAGCATAACATTT  
CCTTCAACCCCTGGTACTCTCCTGTCTCTACTTTCTAGTCTCAGCTTGATTAGAAGAGTGTGCTATGCAGTGCAG  
GCCCTCTCTCTCACTTATGTGCTTGGCCACTCAGGCCACTCTCTCACTTAGGCATTAGGCTGGGCAGGCACTCT  
CTGTCTCTCTTTCTCTCTGTCTCTCTGTCTCTCTCTCTCTCTCTCTCTCTCTCTCTCTCTCTCTCTCTCTCTCT  
CTCTGTCTCTGTCTCTGTCTCTGTCTCTGTCTCTGTCTCTCTCTCTCTCTCTCTCTCTCTCTCTCTCTCTCTCTCT  
ACTTAAGTGCTAGGCTGCACATGCCTCTCTCTCTCTTATGTGCTAGACTGCCAGGGCCCTCTCTCTCTTATAT  
GCTAGGCTTCCAGGACCTCTCTCACTTAGATGTTAGTCTTGCAGGCCCTTTTCTCACTTATGTGCTAGGCTG  
GGCAGGGCCTCTCTCACTTATGTGCTAGCTGCCAGGTCACCTCTCACTTATGTGCTAGGCTGAGAAGCCCCCT  
CTCTCTCACTTATGCCGCAAGAGAGCACTGATTCTCTGAACTGTGACTGTGCATATGTTATGAGCCACAATGTGA  
GTGCTTTGTGCTGGTCTCTACATAGAACAGGTGCTTTTCTTTTCTTTTGTTTTTATTATTATTATTATTATTA



GTATAGCAAGTAATCTATGTTAACATTTTGTATATGATGTATATTCCAAACAATAATTCTGTATGATTAATCTTTAAT  
TTAATGGTTTTCTGGAGGGTATAGTGTGGGTCAAACCTCATTGTCATGCCTGTATGTCAAAAGCTGAGCCA  
TCAAACCTAAGATCTGCATCTGTACTTTTTAAACATTAATTTCTTTATAGATTTCCAGTACAAAATCTTCAGGGAA  
AATTTGAAGGTACATTTTTGGATATATAATTTTTTAAACTATATAGTATTAGCATAATTTCTATATTAGGAAATATTA  
GTTAATATACTGTATGACATCATAGTGAATTATTCTTTTTATATGTAGTATTTTGAACTATTTTTATTTTTATTTATT  
ATCTATCTATCTATTTATTTATTTTTACTAGATATTATGTTTCTTTACATTTCAAATATTAGTCATTTCTTTGTTTCACCC  
CAGATAATCCCTATTCCATTTACCCTCTCTGTGTTTTATGAGGGTCTCCTCCATCTTTCAATTTTACCCTCCCCACCC  
TGGTACATGCCTACACTGGGGAATCAAGCCTTACAGGACCAAGAACCTCTCCTCCCACAGATGTCTGACAAGGTC  
ATACTCTGCTATATATGCAGCTGGAACCATGGGTTGGTGCTTAGTCCCTGGGTGCTCTGGACAGTCTGGTTGGTTC  
ATATTGTTGTTATTCCTATAAGGTTGCAAACCCATTCAGCTCCTTCAGTCTTCTCCTGTATCTTGTCTACTGGGAACCC  
CATGATCAGTCTGATATTTGTCTGTGAGCATCAGCCTCTTTTCTGCCAAGAAATGGCTGAGCTTCTCAGGAGATAG  
CCATATTTGGCTCCTGTCAGCAAGCAAGTGTGGTATCCACAATAGTGACTGGGTTTGGTGTCTGTATATGGGATG  
GATCCACAGGTTGGGCAAACAATGGATAGTTATTCCTTCAGTCTCTGCTCTGCACTTTGTCTCCATATTTTTTCCAA  
GGAGTATTTTGTCCCCATTCTAAGAGGGATTGAAACACCCACACTCTCATCTTCTTCTGCTTGAGCTTCATGTGGT  
CTGTGAATTACATTTTGGATATTCTGAATTTTTAGAATAGTATCCCTTTATCAGTGAGTGTGTACCATGTTTGAATT  
TTGGGATTGGTTACCTCACACAGGATGATATATTTTATATCCTTCCATTTGCCTGTGTATTTAATAAAGTCATTGTC  
TTTGTATCATTGTCATATATTTTTATCTCTATTGCTCTATTCTACAGCTTGAGGTCGAGGATGTTTCCCCCTGTACTTC  
TTTTATTGTTGAGAATAGTTTTCAATATCCTGGATTTTTTTTTATTTTCAGATGATTTTGTAATTTGTTCTTTCTATCTT  
TATGAATAATTGAGCTTGAATTTTGATTGTGATTTCACTGAATTTATAGATTGCTTTTGGTAAGATCACCATTTTTAC  
TGAATTAATCGTGCCAATCTATGAGCATGGTAGGTCTTCCATTTTCTGAGATTTTCAATTTCTTTCTTCAGAGACTT  
GAAGTTCTTGTACACAGATCTTTCACCTGCTTGGTGCGAGTAACAGAAAAGTATTTTCTACTTTAAGTAAATGTTA  
ATGAGACTTTAAATTTGATTTACATTTGTTGTGGAAATACGGAAGTATTGCACAAAGTTTTAGAAATGTACTTTAT  
GGTTTATTATGTTTAAACAGCATAGAAAAAATCAGTTACATAATCAGGCAATTTGTATATTTAATTGAATTATGTTTT  
ACACTAAGTCTTAACTGAGTCAATATAGGAAAAAATTAGACTTTCTATTTGGTAGAACAGAATAAAACCCACTT  
TGAAATACAATTAATTTACTAAAAAAGATTACCTATCTATCTATCTATCTATCTATCTATCTATCTATCTATCTA  
TCTATCTATCTATCTATCTATCTATCTATCTATCTATCTACCTCTCTATTTTCTATCTATCTATCTATCTATCTA  
TCTGTCTGTCTGTAACCTTAAATTTGAAAATCTAAAACATAAAAATAAACTTCTCTGATAATCTCTTAGAAAAAAA  
TCTGCAATTACTCCATTAGATGATTTTTTACTGCTATTTTTCTTTTTATAGTATGAAAAGAACAATTTAATTTTTTT  
GAGCGTTCTTTTCTATTTGTATAAATTTGACTGCTTTCATTACTTTGCTTTACAGGGTCATGATCAACAACAAATTA  
TATGAGCAGTATAAAAATATGTTTCAGAAGTTGTATGTGGGTGTAGAGAAATTCGATAAAGAACAAGAAAAACAA  
GTGGTTGGTATAGTAAGTAACTTTATAATTAACCTCGTATACCTATGTATCAATTAGGAATGGAGAACTAACCTTG  
TGTTGACACTTGAAACTAAATTAAGTCTCATTATCTAACTATCCTTGGTTCTGTTCAAGACCTACTGAATTGTAAT  
CAGAGAGGTATGGTCACATACTATACCAATGAAAACCACTAAGAATTTTAAATGGAGACGAGATCATAAATTTCCAA  
GAGACAGACATTTTCTGAGAGATGAAGAGAGGATTACCAGTTTTTACAATATGTCAGCCTCAGGTATAGTTGAAA  
GATAGAGAAAGATTACTTACTGTTGTCATCTGGACTCTGTGTTAATTTTAGAAAACCAAATCAAACCTAGCAAAGT  
AGTTTTAAATCCTAACTTAGTCCCTATTTAGTAAAAAAAAAAAAAAAAAAAAAAAAAAAAAAAAAAAAAAAAAAAA  
GTGTATGGAAACAATTTCTAACAACCATGGCAAATAATCCTGTGTAATAATATCACCAAATTTTTAGATCGT  
CTCCCCGTTAATGTAACAATCATTGTAGTCATCAATGGTTTCCAAGTAAGATCTGAGGCAATTACCATATTAACCA  
TTTTTTTTGGTTGGTTAATTGTTTGGGGGTATTCAATTTGAAATAAACAGGAGATCATTTCTGCATGAGAACAA  
CGTGGAGGGAGCTGCCATTTTGTGTCAGTTTCAAGGAAACAGATAGGGACTAAAGATAAAAAATAAATAAATACTCC  
AAATGAAGGCAATTTTTAAACCTTTTCATAGCATGGCAAAAAACACTGTAGTCATTTACATACCAAAGCTAGAACC  
TCTTTGTAGTGTGGCATTGGGCTTACCATCCTAGTCTCAGTATACTAACTTACTTGAAAATTATCATAAAAAACATA

ACTGAATATTTTGTCTTTAGATCTCTAAAAACCTCAGAAAACTTATCAAATAACAGACTACAATAAATTCAAGAG  
AATCAGTTTCATTTTATTTCAAAAAAATTTAGGCTTTTTATAATATTAATATTTGTTATGAGTAATTCTAGCTCATT  
GGTCATAAATATATATGTTTTAGGAAAATAATTCTAAAACTTAAATGCATGTTTTGTATTATTATGTATAACATT  
GGCAAATTAGATAAGACATGCTCATTTCATGTTAACTCATAAATCTACTCCTATTTTCTGAATCTCTAAAATCAGAA  
ACCTCGCTAGGCAAGATCTTAACTACTGTTCTCCTGTAGGCCATGACATTTTTAGCAGATATTTAAATGTATTAAC  
TGATCTACTAATGAGTAGAAATCTGAAAGACCAGAATCTCTGTTGCCTTTCACATAATGACTCTATTCAATGTAAAC  
TATGACTACAATTAGAAAAAACTGAAATCCTAAAGTCAAATCCTCACCTCTTTTATCAGTCATAGAAAACTTTTA  
ATAGCTATGATACTGTAATCTGTAATCCCAGCACTTGGCAGTTGAATGCAAGAGGATCAAGGCCTTTGACTGTCCA  
TAGCTATATAGCAAGTTTGAGGTCAGCATGAGTAATGTAGGACTGTCTCAAATAAACCTGTCCCCTACAAATCATA  
CAGAAATATAATGTTAGTATAAAGATATAAAAAATAGTAAATATTGCTGTCACCTCAGTAGGAAATTGTTGACCAGA  
AATACTAAAATAAATGTACAATTGGAATTTTTTTACTATAATTTGAAGGGAAAACTATTGAAATCTGGATATCCAT  
AGAGTTCCTGTTTAGAACATTATCCTGACAGCATATAGCCCAGAAGTGGTAAGAAGCAAGGCTTGAGAAATCAC  
AGGAGTTGCCTTGGCCAGACTTTAGAGATGGCAGCAAATAACTATAAGTATCACCTGTTATTTAGACTGAGGAAG  
TGCAATTGATGATGACATGTTCCAATATAATAATAGAAAAACAAACAAACAAAAAACTAGTATTTCTGCTTT  
AGATCTTGGCAGGGCCATTCTAGCCCCATGTTTGACAAAAGCACAGCACACCTCAGAAAATTGTTTTGATGACAT  
CAACAATTGTCAGACTTAAAATCTATTGATGTGCTTCAAACATCTCTCATCTTCCGGGGTTATACATGGTGGTATTT  
ATGAGACCTCTAAATGATCCCTAGGAATAGGAGCATAGTGTGTAGAGTTGGGAGAGGATATATAGACTGGAGAG  
ATAAAATGGGAAGCATGGTGTATCCTGGATTGCCTGTGCCATATACCTTTCAGTTGTGGAATAGATTGAGTGCA  
GATTGACACTATGAGCACTACCCTAGCACACAGTACAGTGCTTTCTTTTCTTTTCCGGGGCTTTGCCTGTGACAGG  
GAATGTAGCTTGGATACTACTGGGTATTGTGTGGAAGATAACAATCATTGGATCAGTTCAAAGCTTTGGGAGCTG  
CCAGTTAATAGGCTAAGCTTCAGACTACATCCTACCAATGGATAAATAGGGTCCAGTCTAGATGAATTTCTGGATC  
CCCAGGATACATGAATAGCATGCAGTATTCTAGAGTAGTATCCAGCTTAATGATACTTCTGTTGCTCTTGTGTCTTT  
CCCTCTTCTGTATCCCCAAGTTCATTCCGCTTTCTTGGCATGACTCACAAATGAGCCTTTGTGTATTATCCTGTGGT  
ATATGAGAGGAGTTGTCTGAAGAGAGATGAAATATTGAGTCATGGCAAACACAACCTGTGGAAATGGAAACCATCC  
AGGGGCAAATGTTGTAATAAACAATAGTCTGTGAAAGAAAAATGCTTTTGCTTTCAGAAGGAGAGTGAATGGAG  
TTTTTCACTAAGCTGGAAGGGGGCTAATAAAGACCCTTTTAACTGGAGAATTTAATAAGAATTAACCAAAACCCA  
GGTGCAATTATTCTTACAGGAGTGAACCTGGATAGATGGGTAGAGTTTGGCTAGTATAAGATACTTGATTTAATGAC  
TTTTGAGGTCCTTTTTCGAAATCATGATCAATAAATTCTGCTCTCTGTGACATATCTACTATATTTGTTTGAAGATG  
AATAAACTAGGATACATAGATATAGCTTTATAGTATAGTTCTTGAACCTTTCATGATGTGACAATTAATCTGCATGA  
TCAGGACATATTTAGAGCTCTGTATTAGGCACACATAATCTATAGCTCCTGGGACATACACGCAAATGAACAAAC  
ATGACTTTATAGTGTCTTGTGTTTTCAGAATGGAATACATTTTATAAATAATCTAAAAGCAATAGGTTGAGTTCTAT  
GTTCTTAGAGACAGAACCTTAAAGACCCTAAAAACTCTAAAAAAGAAAAAAGAAAAAAGAAAGAAAAAAT  
AAACTTGAAGCTTTAAATAAACAATAAAAAACCCTAAAACAAACAAACAAACAAAAAACAATAAAATTTTTGAAA  
AAATAAACTAAAAGAACCTAAAACCCTAAAGAAAAACAAACAAACAAAAAATCAACAAAAAATTTCTAGATC  
TCTACAAAGACCCAAAAAACCTAAAATAATTACCACAAACAAACAAACAAAGGAAAGAACAATAGCCACACTAAG  
CCTTAAAAAATCTTGCCAAATACACTGAGAACAACCCTAAAATCATTTAAAAACCGTAAAAAACCCTAAAA  
CAATAAAGCAAAACCTAAAACCCTAAAAACCCTAAAATTATTAACAAACACTAAATGACCCAAAAAGCTATTT  
TTAAATTTCTAATTAACATTTTTAAAACCCTAAAATTCTATAAATAAGAAAAACAAGAATCTAAAAAGACCCTA  
AAAAATTATAAAACCCTAAAAAATAATCCAAAACTCTACAAGTCTAGATCCCTAATGAGACAATAAAAAAGCAA  
TTAAAAAAGAAAAAAGAAAAATGAAAAGATACAAAACCACCACCCCAACAACACTACAAATTTCTGCTTAAAAA  
ATCGCCAAAAACACTGAAAAAGAAAAATCATTTTCCAAACCTTATTAAAAAAATGCTTAAAAACAATTTTTAAAAAT  
CCTTAATTAATTAAAAAACAACAAACAAACCTAAAAAATAAGAAATACCCTAAAATTTCTTTTTTTTTATAAAAGAA

AACATTTATTTGGGGGCTTGCTCACAGTTTGAAAGGGTTAGTCCATTATCATCATGGTGGGAAGCAGACAGGCAT  
GGTGGAGGAGAGGTAGCTGAGAGCTTCGAATCCTGATCTGAAAGCAGCCAGGAGAGAGAGTGAGGGGGAGAG  
ACAGAGAGAGACAGAGAGAGAGAGACAGACAGAGAGAGAGAGAGAGACAGAGAGAGAGAGAGACAGA  
GAGAAACAGAGACAGAGACAGAGACAGAGACATAGTTTCAAAGTCTGGTATGGACTTTGAAACCTTAAAGATCA  
CTCCTTACTAGGAGTGATCACACCTGTTCCAACAAGGCCACACCTCCTAATCCTTCCCAAACACTTCCATTAACCAG  
GGAATCAAGCAGTCAAGCATATAAGCCTACGTGAGGTTGTCTTATTAGACCAAGACACTCATTAAACCTTGTAAC  
AAAGCCAAGTTGAAAAGCAGTACTGTACAAGTGTATGAGAAAAGTTGCTGGGACCAGGCTTACATTGCAATGCA  
GTGACCTGGCAACTCACTCAACAACAGTAAAAAGACCCACAAGAACTGTAAAACCCTAAAAAAAAGTTCCTTTAAA  
AAGTTCTAAAAACACATCAAAACTCTGAAACTCAAAATAAAATCCTTGAACCCGCTTTAAAAAGCAAAACAAAA  
AAACAAACATACAAACAAACAAACAACAACAAAAAACCCTACAATACCCTGAAACCCTAAGTAAAATCCTGAGA  
CTATAAAATCAATCCTACCCTCCCCAAAATACCTACAAAACCCTGAAACATTAATAAAATCCTAAGATAAAAAAA  
TAATCCTAAGCCTATAAAAAAAGCAAACACACACAAGAAAAACAAAAACCCTTACAAAATCCTAAAACCCTAT  
AAAACACTAAAAGTATAAAAAAGAAAACAAAAACAAAAACACAACAAGAAGAACAATAACACAAAAA  
ACTACAATTCTCTAAAATTATTTATAAACACTAAAAAGCCCTAAAACCCTGAAATACCTTAAATAAATAAATAAT  
AAATGAATAAATAAATAAATAAATAAATAAATAAATAAATAAATAAATAAATAAATAAATAAATAAATAAATAA  
CAAAAAACTTATAAGGACAAAAAACCTACCAATTTAAAACCATTAAAACCCTAAAACCTAAATAACACAAGGG  
CTTTACCCTCCCGCACACCCCCCTCTAAAAAATAAATAAATAAATAAATAAATAAATAAATAAATAAATAAATAA  
AGCCTAAAACATTAGAAAAAGTAAATCAAAGAAAAAATACTAGAATCTTAAACAAATACTGAAATAGTCCTA  
AAATACAAAAAATAAATAAATAAATAAATAAATAAATAAATAAATAAATAAATAAATAAATAAATAAATAAATA  
TATTAGCTAGGCAGTCATTCAACTTACAGAGTTTAGCCTGATTCTGAGTGCTGGTATTAAGGGGAATAAACTAT  
ACTTGACTCCTTTTTGTTTGTATAATTGTTTTCTAAAAGATTTTTTTTTCTCTGTGGGTGAGTATATGTGTGTGCGT  
GTGTGTGTGTTGTCCAAGAGGTCATCAGATCGTCTAGAATAAATAAATAAATAAATAAATAAATAAATAAATAA  
TGTTAGAAATTGAACCCTGGTCTGTGCAAAAGCAATCAGTGGCCTAAGCAGTGAGCTATCTCCTCAGTCCTTTC  
TGCTTGCTCTAATCTCTACTTCACTATTATCTGCTAAATATGTCTTTATTCTACTTCTCTGTCTGTTTTATGTG  
ATGAATCTGTTTGTCTTTCTCTGTTTCTCCAATTACAGCACCAAGATTCTTCATTTCTTTTGTGGAAGATTCT  
CAAGGAATCTTAAATCCAGACTTTAGGGCAGTTATTTAAAATTCACACCTGGGGATTAATCTTCAGAAAATTATTT  
TGGGAAAAACATGTGATTATTTCAACATCTATAGTAGTGTGGGGCATTATTCTCCCTACGTCATGTACACTTAAGA  
TCTTTAGATACCTCCTTCCCTGTGATAGCCTTGCAGCTCACTGAGTGACATGTGCATTTGATGATAAATGATACACA  
AACTTTGAAGCACCTTACCATATCCTGTCACCCATATCATGTTCAACATAGCAAGAACCACAAGTGAGTTGAAAAAT  
ACAAATATATTTTTAGTGTCTTGAAGCTATAATCCCCAAATTAATCAAAATATTATTTGGACTCTGTTACTTTATAC  
CAGTGTTTTTTTTTAAGTGTACAAGTCGAGGCCTTTTCTGTGACCCCTTGCACAGGTTTACAGTGTCCTTTACCAT  
CTTCATCTCCCACTATCCTCCATTGCTATCAGATCTCCCCCTCTGCTGCGCTTACTCTCCAAAATACCTCCTAT  
TTTTAATGTCCCTTATTAATTTATATTTTTACAATAGTCATTTTGAGTTTTACTTGTCTAACCTAATATATAGTATTT  
AACCATTCCATCCATTTTTGAAAACAAAGCGCTGACTAATACACATAGATGAGAAATATATTTCTCTCTCTCTC  
TCTCTCTCTCTCTCTCTCTCTCTCTCTCTCTCTCTCTCTCTCTCTCTCTCTCTCTCTCTCTCTCTCTCTCTCT  
ATAGCACGTATGTTTCATACAGTGAGGCAATCAATATTGATGATATGGATATGTAGTGGTCTTCTTAGATTTTTTT  
TTTTTTGTGAACTTAAATCAACCTGGGAAGATAGAATCTCAGATAAAGATCCTCCATCACATTGGCCTGTGGCCACA  
CCTTAAGGAATGATTTTTTTTTGATGACTGTTGTTGAAGGATCTAGCTCTCTATGGATAGTGTCATATCCTATGAAG  
ATGATGTACAGGGTACGGTGGGACCCTGGAAGGACTGAAAAGGATTTTTTTTTGAAGAACTGAAGATCTATGTG  
CCATGAAAAATTAAGTGTCTCTAATTTGTAAGTAAATTTATACATACCTGTGTCCAGTATTCTGTCTACACATAT  
TTCAAAACTAAAATTACCTCATCTATTTATCTCTGTTTTACTGCATTTAATCTATGAAATTAATAATCAGAAGTGC  
TGGTAAATTTTAAAACCTTTAAAATATGACTGGGAGATATCAGGTTTTTTTTTAATTTATCACAACTTTGTAAGC

ATGCCCAAGATCTATGTTGTCCTCTTACTTTCCAAAGAATCCATAATTCATGATTGCCATTGGTTTCAATACATGTCA  
TTTATCCCTGTCAAATCCAGGTTTGTTCATAAAAATAGTCCTCCTCTAACTGTGGGTTTTTCATAAAGTGAAAATT  
GGTGTGCTATCCAGTGTGCTGCCTCAAAGAATCTGGCAATATTTATGATAAGAAGCACAGCTTAAAGATAACCAAG  
GGAAAGGTTGGAACATGAAAAATAACCACCATGGATGTTGTCAAGGCAGAAACCGAAGACTTCTCAGAACGAA  
AATAAAAAACAAAATGAAACAAAACAAAACACAAACCAAACAATAAATAAAAAATTCAACAACCAAACAATAAAA  
ACCATGCAAGGGTGAATTCTTTGGCAGAATATTACTCATATCATCAGGCCTTTCAGTTGAGATTTCAATTTATTATT  
CTAGGAGGCCATATGAAAAGGTAAATTCGAGATGCTGAATGTTTCTGAGTGTAACTAGGGAAGGAACCAGCCTGA  
GAGGGGTTCTATGATGTAAGCTGAACTAGGGTGATGTCACAGAGCACTGGCTGGAGGTTGCGCATCTATTCCACT  
TGGAGGCGCTAGAATCCATTCAAGGTGAGTTCACTATCTTACAGTGGTTTGTCAAAGCCAGGTCATTTTTTCCCAC  
AGGCTTTTGGTGCCTGGTCTCTATCAGGAGATCTTGACGACTAGGATATTTTCTATGGGTAAGTACATTTATGAAA  
TAATTGGGACCTCATAGCTACAGAAAGCTAAAAATTTCTCTCCTACAGTGAGTTACTGTACATTCTACTTTCCCCA  
TGTTTATTAGCAAGGGAGATGAATGGTCTAGGTTAGTTTATCTCCTGAATTTATTATCCTTGCTAACCATATCTAGA  
TCACAATCCACTAAAATGCCAAAGCTCCTGTTTGTCCATGTGCATGTTAGAAGTTATTAGTTCTAAAAGGCTGATA  
TTGCCTCGACTTTTTGAGTTGTTCTTGAGTTCAGTGATGCAATGGCTTCATCGAATAATTCTGAAGCTGGGTGAGGA  
GAAACAATAAAGAAGGACAGTGGTGTGCTGTGCCCTGGGAAGATATTTGTGAATGCAAGAAGTTAGCTCAGAGC  
TTACGCGTACAAGAGAATCATGGTGACCCCTCTGGCCTTTTTTTTTTTTTCTTCTTCTTGATCATTGGGGGTAATT  
GTCATAGCACCACTAAATTGACATAGAAATCAAGGAGAGGATCCTCATCAGAGACAAATTTACTCAGGTCTGAA  
GAAATAAATGTTGATCTGAGTATGTTATTCTGAGCTCTAGAGAATTACTGTTAATTACACTATTTTTATTTCTTGT  
TTCCCTGTTTCTTTGTTTGTGTTGTTGCTTGCTTGTTAATTTTTATTTGAGTTTCTGTATGTTTAGATTTGGCTGTCA  
GGAAACTCACTGTGTAGACCAGACTTGCTTTCTCTACTAAGGTCTGCCTCACTCTGCCTCTTGAGTACTATGATTA  
AAGTTATGGGTCACTACCACTTCTATTAACCTCTCCATTTGATTGTTTGTGTTTGTATTTTTGTTTGTATTTCTGTTT  
TGTTTGTGTTTCTGTTGATTTTCTGTTTCTTTACTTGATGTTGTTGTTGTTGTTGTTGTTGTTGTTGAGACAGGGTTCC  
TCTCTATAGCACTGACTGCCCTGGAACCTCACTTTGTAGACCAGGCTGGTCTAATTTAGAAATCTGCCTGTCTTG  
CCTTCTGAGTTCTGGGATTAATGCGTGTACCACCATGGCTGACTTATTAACCTCTTATTTTTATAAAATTAATTTTA  
GGAGCTCAAATCTGTTAGCATAGTCTTCTTACATGCTCAGAAGTTCTCGTAGAGAAGAGTCTTGGTCCAGCATTCC  
ACTCCCAACCCATAACCAATTGCCATCAGGAATTCATATATATGACAGAGGCAACAGCATTGTGTCTGGCGTAAAC  
GGGCAAGATCTTCAGTCCCAGGCAATGGGCAAGTATGATATTTGAAGAGAATGGAAGCCACTTAGACAGTGTGAT  
CTAGCACAACAGGTCTACAGCCAGGTAGAAGACAATACCTCTGAAGAGTCTGAGCATGACATCACTCAAGAAGAA  
GAGTAGGAGGAAGCCTTCTTCCCAGGCCCTGGGGAATATTGTTGGCTGCAGAATTTCTCACGGGTGGAAGGAAG  
GTAATGAGCCTGTCACCCATTGGAAGGCCATCATTCTAGGTCAACTGCCAACAAACCCTTCTTTATTTGGTGAAG  
TATGACGGAATTGACAGTGTCTACGGACAGGAGCTCCACAGCGATGAGAGGATTTTAAATCTTAAGGTCTTGCCCTC  
ACAAAGTAGTTTTCTCAGGTGAGGGATGTCCACCTCGCAGGCGCACTGGTTGGCAGAGAGGTACAACACAAAT  
TTGAGGGGAAAGATGGCTCTGAGGACAACCTGGAGTGGGATGGTGCTAGCCCAGGTGCCATTCTTACAGGACTATT  
TTTACATTTCTACAAGAAGGATCCGGTCTCTACGTCTATCAGCTCCTGGATGACTACAAGGAAGGTAACCTCCAC  
ATCATTCCAGAGACCCCTCTGGCTGAGGCGAGATCAGGTGATGACAATGACTTCTTAATAGGTTCTTGGGTGCAGT  
ACACCAGAGATGATGGATCCAAAAAGTTTCGAAAGGTTGTTTACAAAGTTCTAGCCAATCCTACTGTGTACTTTAT  
CAAATTTCTCGGTGACCTCCATATCTATGTCTATACTCTGGTGTTAATATCACTTAAATTGAAAAAATCACAAAGT  
ACAGAAATGTAACTTATAGGATTGAAAAAATGTTTGTTCCTGTGTTGGGTACCTATGGGTCTTTGACAACCT  
CAGTATCTTTGTCAATAAAATTTGTTTGTCTAAAAATTAATACGTGTGACATGACATGCTTTTAGTGAACACTTTG  
TTGGAAGAGATGGACTATGGTAGAAAGAACATCAAAGGAAGATGAAAGTTGCAACGCAGGCTGTGAACAGTGCA  
TACATCTAATATCACACAGGCTAAAATGGACAGGACTTAGATTCTGTGGTCTGCATAGTGAGCAAGGAATTGGAG  
ATATGACTTAGAGGAGCAGGGATGGCAGCAAAAATGGATTTTTAGGAAGAAGCAGAGAAAGACAGGACATAG



AGGGAATGGAGTGTAAACCCCTTCATGGATGTATTGGTGTCTGATTATAAGTAATAAAAACCCAGTACTATTAACAG  
CTAAATCACAGGTGCTATGACAAATAACAACCTCACATGAGAAGCATCACATTTGGTTAAGCCTTTTCAGAAGTTTTA  
TTGGAGTTTGATTTATATACTAAATAAATCCATTGATTTATTTATTTTAAAGTGTGTAGTTAATGATTCTAAACATAT  
TTCACCACTGTCATTTTCACTCATTCTGTTTCTCATATGATATTGAAATCTACTAAAATACAATAGTGAATTGAG  
AAGAAAGACCAGTGGTGTGGGTAGCAGCAAAGTCTTGAGTCTCAAAGACAACAGATACCATGGCTGAATATTCC  
AACTACAACAACCTAGGTAACATTGGTTCTACACTTAGCATGCCGTTTCTAGAAAAAAAAAATTAAGAATTAAGCA  
ATGTTTCTCTGAACCTGACATGTTACTATCACAATGAAAGAAGGATCCATGATCACATGAATATGAAAGGGGCA  
TGAAGCAGCACAATTGTTCAAATTATTGGCAGCTAGTCAGCATTAAACACAAGAAGGGACCAAAGACAATAACAG  
CTTTGAAGACATGTCAAATGACCTCGTTCATTTACAAGTTTCTTACCCATTCCTTGATATCCATTGATTGATTA  
CATTGATTAAGCCCTCAGGTTCCAATCACTTTTCAGAGTGCATATTGTAACCTATGAACATTGACTGTGGACC  
AAAGCCTTCATCTAAGACCCATGACTGACATTTCAAAACAATTTAACCCACAGAATTCCTTATTTGAAACAAAGTGAT  
AAGATCCATCTATCTCTCAAGTATATCTCTGTTTTGTTCAAAAAGGAGAAAAATGCAATCCAAGTTCAGGATCTTG  
ATCCCTTATCCATGCATCTTAAACCCATAGGGGCTAGCCAGAATGTAAGGTCAGAAGTCTAAACTTCACCTATACTA  
CAACTAACTCTGAAGATATCTAGCAATCTCCAGTTCCTTCTGGTACTTACCCACACCAAGTCTGCATTAAGGAATA  
TGGTCTAGTGTGAGATAGTGCCAGCAGTTAATTGCAAAATCCCCTATGAGTTGAGTTGATATATACTGAGACAT  
CTGTAATATAGACACACATGCATATTCACAAATACTCACAGAAAGAGGCAAGAAGTAGAGGAGCTGAACTTAGA  
AATCCTCAAGGAAGAGAATGAAAATCTTGTAAGGCACAGAGGTAAGAGAAAACTGTGTCTTTCTGCACAAAATC  
AGGACATTCTGTCTCCATCACTGAATGGGAAGGCTCACTATCCCTTATCGCTATCTGATAAGGTATAGACAGTTGA  
TGAAGGATGAATAGTAAGTTTTTCATCAAAGGTATTGACTTTGAAGTTATAGATTGTTTCATGCTCTACTGGTAGCC  
AGATGTCTAAGAGTTTATGGGAAACACAAATGATTTGAATGGGTTGTAACAAAGGGGAGAAGACGAGATATGAA  
GTTGGCAGGAGGAGTTAGGTGGGAGTGGGCCAGTTTTGTTCTGGGAGGAGTACTAAAATAATTGGAAAGTAA  
ATTCCATCAAAATATTTGTATGCAATTCTCAAGGTATTAAGGAAAGTAGTTCTTAATATACCATGACTGAACACAC  
ACAGACCACTTATATTGCCATCTTCTAAATAACAAATTCTTATAGAGCAGTTTCATTACATTGAGGGCAAAAGTCAT  
CCAGAGGTTATTTAAAATAAAGAAGAATCTAGGGAGATGGCCAGTGGTAAAGCCAAGTGTTTGGTCAAACATTC  
ACCTAAACACCAGTGCTTAGGAATTGGAGTGGCAGAGACAGAAGAATGACTGTGGCTTCTGAATGTCAGCCTCA  
CTCCTAGCTCAGCAAGAAACCCCTGTCCAAAGGGGAAAATTAGGGAGTGAAGTAGCAAAAAACAGTATACCCTCC  
CTATCCTCTGGACTTACCTGTATAATTCTGTATGCATACACACATCAATATGATAACTGTATAAAAGAGGTTACTTT  
GCATAAATTATAGGCAAAAGCAATGTTGTTTTAACCTAGAGACCTGAAGACTTTTATATATTAATGGTCTGGAGA  
AACTCTCCATATATAGAGGATTGATATATCTTCTCCTGTGCAAAGGAAACCTAAGTTAAGTGTGTGTGTCAGTGAC  
TTTAAACACCTTTCTCCTCTAGATTCTATTTATACCACAGAATGGTCTGTAATAATGAAAAGATGAAAATAAGA  
CTTTTTCAGGGTGTGCTTCTTTTAAAATCATATTTATATTTTACTAAATCGATGGAAAATCTTCAGCTCCAAGGAA  
CAATGGTTTCAATATTGTTGACTTCTGTATTATCCATTATGAATAGGAATTAATTATACATCAACATTTCCACGAT  
TTGAACTAAATCAGGAATAAGGGATATGTTTCCATAAAAATAAGTAATGCCAATATCGTTAATCAAGTAGAAATGT  
GTGTGTGTGTGTGTGTGTGTGTGTGTGTGTGGTGGGGTTAGGATGCCTTGTATTATTTGAGAATGATTGCTGATC  
AGAAATATGTTATGCAAAATAACCCTAACCTGAGAGAAATGAAAAGTAATGATATAAACTATACTACCAAGTGTGAT  
GGCCACTTATTAGTTGATATCATTTTCTTTTTCATTCTTTATTCGTTTGAATAATTGTGTGCCACAGATGATCACAC  
GTTCAAATGTGTTAGTTTTCCGGGTGATGGGCTGTTTGAATGAATTAGGAGTTGTTTTATTATTAAGGAGATTT  
GTCACAGAGCCTTGAAATATCAAAAACCCATCAGACTCTCTATCTCTCTCTCTCTCTCTCTCTCTCTCTCTCTCT  
TCTCTCTCTCTCTCTCTCTCTCTCTCTCTCTCTCTCTCTCTCTCTCTCTCTCTCTCTCTCTCTCTCTCTCTCTCT  
TCATAAGTTGTTGCTCTCAACTACTGCTCTACATGTTTTGCCTCTGTGTTGCCATGGTGTCTACCATGATATCCTGG  
ACTTGCCCTCTGGAACCTTAAAGACCACAATTAATGTTTCTCTTATAAATTTGTTTGGTCATGATGTCTCTCACAGC  
ATAGAACAGTAACCAAGACATACATACTCCTGTTTATTTTTGAAACATTCTTATTTCTTTCATTAAGTTACCTTTT



GTCCATTGAACAGTTTTAAGAATAATGTTAATGGGCCCAAATAAATAGTGCCAATAGGTGTGGCACTCTCAGGAAG  
TGTGAAATAGTTTCATGAGGTGTGACATTTGTGGAGTTGTTGGGACTGATGGAGATGTGTCTTTGTTGAGTTGG  
TGTGATCTTGTTGGAAGAAATGTAACAATGTGGTGGTAGGCTTGGAGGTCTGCTGTCCTTAAGCAATCCCCAGTTT  
GACACAGTCTCCATATGCTTCCTGTATATCAAGACCTAAAACCTCATCTCCTTCTCCAGCACTTTGTCTGTCTGAAGGC  
TACCATGTTTCCAGCCATGACAATAATGGAGTAAACCTCTGAAAAGAAGTTACAAAGTGTTCAGATTTACTATGA  
TCCTGGTGACTTTCATGGCAATAAAACCCATACTAATACTCACATAAAACACTCAAAAACACATTTGGTGTGTTTGTG  
GGAACAGACTTTTTCAGGCCCTCTGCCTACTGCCTGGAAGCTATTCATTTCCAAGCAGCTATCAGATGAAGTTATAG  
AACTCTCAGCTCCAAATGAACCATGCCTGCCTGGATCCTGACATATTCTTACCTTGATGATAATGGACTGAACCTCT  
GAACCTGTAAGCCAGCCCCAATTAATGGTTTTCTAATAAAACATGCATTGATAAGTGTGTCTGTTTACAGCAATAT  
AATCCTAACACACACATGTACATATACACCTAGATATACTGAGTCACAGACACACACACACATGGAAACATTCA  
CACACACACACACACACACACACAGAGACACACACACACATTTCATTTACAGGGACTTTAGATTAGCCAGTA  
CCCATGCAATTTAATTGGGGTGTGAAATACATGTGTTTGTGGAACATGACTATTGCTCTTTCTTTTAGGAGTTATGT  
GGACAAAATCTGCACACTCACTTCATTCCTCTTCAACATCAGAAATCTCAATTTAAAGAAAGTGAGATAATGAGAA  
GTAGTTTTAGATACTCTTTTTTTTTCTGTGAGTAGCTTCCACTTCAAATCACCAAAGAAAAATAAACATAACAGG  
AAAGAAATTCATATTCAAATGCTCTTGACAAGCTCATAATACATTCTCCATAATGAATATAAACTTTTTATTTAGAATT  
CCAAGGAAATGAGACTTTTGAAAAATCCTTACTTTTTCAGATAGGCTTTGGTATTTTCATTTCCCTGCAAAAAGAACACC  
AATGTA AAAAGACAAAATGTAGATTGCTTTGTGCACAAGTTGAATCAGAAACATTTGATAATGTGCATACAGGGA  
CTCACCACATTTTTACAAACATATATATATATATATATAATATATATTGGGAGGGTGAAAGGAGACATCTGGA  
GAACAATAAGACCCTCATTAGCATTAAACATTCCTGAAGTCAAGTAATAACATCTAACAACATCAATAACAACAAC  
AACAAAAAAACAACAAGAATAGATGTTCATTAGGAAGAATTTTTAAAATAACCTTCCATTAGCCACATAAAGAGG  
GGCATGATCCATCTGCAACACTTTATAGATACTTATTACAATTACCACTAAAATTTTTAAAATAATACGGATTTTTA  
AAAATGAAATTGAAGTAAAATAGATTTTTTTCAGCTGTTAAAAGGGGGAAAATGTGTTCTAGAACGAAATAAAGAGT  
GTAAGATTTTTAATAAAGAACATCCTTATAACTCATGTGTCAGTAAGTATCAGGATTATAATGCAGTTGATTTTCT  
CATTGTAGAATAATTTAATGTGTTTGAATATTTCCAGTTGTAAGAATGGATCTCAGAATTTTACAGGACAAGAAG  
AAGACACCAAGTAGTTCCTCACTTTTGTTCAAAATTCTAATTCCTTTTTTGCAGAGTCCAGACATTCCAGGGAA  
GGTTTTGAAACATCCAACAACCTCTGAGACCATAACCTCAGAGAGAAGCTACCTTTCTCAGTAAATGGAAGTGGAA  
AAGCTGAAAAGATCCATCAAATCGCTTTAGAACAAAATGGCAGCTGGTTCACAGAACAAGGTATCATTAGCAA  
CTCAGCCAAGAAATAAGAGGATTTGAAATGATAATAACACAGAGTAATAAAAACCACTATGCAGTTGTAATTTAAT  
TGTATATATATACTTTGGACAGAGAAAGCAATCAAATCTTGAGATCTCTGCTCAGCCCAATGAAACTCTGGGTC  
ATGCTGCAGATGTCCCAAGTTCATGGCTCATCACAGATACTGGAAGTCTCTGGGAAACTAGAACTACATCACGTAA  
GTGCTGTGAGTCCAAAGACATGATTTAGAAAATTGTTCAAGTCTCATCTTGCTTGAAAAAAAATCACATAGCAC  
CAGAAGTAATAAGAAGTTCATGGTATCAATGTCAACAGGTAAGCACTACTAACAAATATCTGTTAAGCATTGATTG  
TTACCAACTCAAATGAGGAGATGATTTTTAAATTTAAATGCAGTTACATTTTAATAATTTGTAGTAATGTTAAGTGT  
CCAGTGTGAAACTGTGGGTGTAGGGCAAGTTGGTGAAGTGAGAGAGAACATGGACGGCAGAAGGTTCTGTGCTC  
TGTGAAGGCTGACATGGGAGGAGTGAAGGATAATTACCATGCATACCTGATTGTGCATCTGGCTGTGTAATCCA  
CTGAAACTACCGGATGGGGGTGAACTAGGGGAAGACAATGGTACCAGATTCTTTGTCTCTGGCATCCCATATTG  
GGCCTAAAAACATAGACAGTCTAATGTTTTAGAGCTTTATTTTAGACAGCAAGGAGAAAAAAAAGAGTAAAAA  
GATTGTTAGACTTGCTATGGCCAAAAGGAGAGATGGGGAAAGACATAGAAGGAAAGACAGAAAGCAAGTTAGA  
GAGTAAGAAAGTTGAACGCTTAGAGAAAGAGGTAAGTTTACAGAGAGTAAGGATTGTAAGGTTAGAGAGAG  
AGAGAGAGAGAGAGAGAGAGAGAGAGAGAGAGAGAGAGAGAGAGAGAGAGAGAGAGAGAGAGAGAGAGAGAAAG  
AATGAGAGACTGATGTAGGGCCAAGTAGCCTCTCATATATTGGGCTTGTTATCTTGCTGTTGCTAGGTAAGTAAAG  
GTTATCTAACCTGAAATCAGAACCTTTGGTCATTTTGTATGTGACTGCTAGCCATTAGCCACTGCAGGGCGGGAGT



TGAGGTTGTCTTACAGATTAGAGTGTGTCAGTACATTATTATCTTGGTAGGAAGCATGGCAGCATCCAGGAAGAGG  
AGGTGCTGGGGAAGGAAGTAATTGGTCTATATCTTAGTCTGAAGGCAACAATGTGGAAGCTTGTGGCCACAGTTA  
GCAAGGAAGAGGATCAATTTTTGTCACTGGGCAGAGATTGTGCACTACATAAAAGCAAGCCTACACAATGATACA  
CTTCCTCAAACAAGCCAACACCTTGTAAATAGTGCCACATCCCATGGGCAAAGATATTCTAATCAACACACTGCATC  
ATAGGAAAATGGCAGAGAGAAATAAAGAAAGACACTGCATGATTGCATTCTCTGGTCACAAGTGCTACATACCT  
ACACGCTTATATGCACACACAAACACACACACACACACACACACACACACACACACACACACACACACACACAC  
ATGCCTATCGGATGTGCATAATAATAATGTGCAGTCTAGGGTCTGGGCAATTTGATTGGACCAGGCGCTGTGTTT  
CACCCACCAGAGGTCTTAGGATCCCGTGGAGGATCCTGTGTGGGTCTTGTGGGTGTCCACAGAATCCCCGGTCC  
AGGGACCATGGTGCTCCCTTGATCTACTTCTGTTGTCCAATTGCTCTGGCTAGGATTTCAAGTGATATATTGAATAG  
ATAGGAAGAAAGTGGCAGCCTTGTCTAGTCCCTGATTTTGTGGGATTGGGTTTGTCTCTCCATTTAGTTTGAT  
GTTGACTACTGTTTTGCTATATACTGCTTTTATTATGTTCAAGTATGGGCCTTGAATCCTGATCTTCCATGACTTTT  
TTCATGAATGGGTGTTGGATTTGTTAAATGATTTCTCAGCATGTAAGGAGATGATCATGCGGTTTTTGTTCAG  
TTTGCTTATATAGTGGATTACGTTGATGTGTTTCTTATATTAATCCATCCCTGCATCCCTGGGATGAAGCGTACTTG  
ATCATTATTGATGATCTTGTGATATGTTCTGAGATTGAGTTTGCATGGACTTTATTGAATATTTTTGCATCAATGT  
TCATAAGGGAAATTGGTCTGAAGTCTTCTATTTTGTGGGACTTTATATGGTTTGTAGTTATCAGAGTAATTGTGGTAT  
CTATAGAATGAATTGAATAGGGTACGTTCTGTTTCTATTTTGTGAAATAGTTTGAGAACAGTTGGAATTAGTTCTT  
TTTGAAGGTCTGATAGAACTCTGCACTAAACCATGTGGGTGGTCTGGGCATTATTTGGTTAGGAGACTATTAGT  
GACTGCTTCTATTTCTTAGGGGATATGGGGCTGTTAGATCTTTAGATTCTTATCTGGATTTAACTTTGGTACCTGA  
TTTCTGTCTACAAAATTGTCCATTTTGTCCAAGTTTTCCAGTTTTTTAGTATAGCCTTTTGTAGTAGGATGTGATGA  
TGCTTAGGATTTCTCAGGTTCTGGTCTTATGTCTCACTTTTCAATTTATGATTTTGTAAATTAGGATACTATCCCTGTG  
CCCTCAAGTTCATCTTGCTAAGGGTGTATCTATCTTGATACTACTTTCAAAGAACAGGCTCCTGGTTTGGTTGATAC  
TTTGAATAGTTCTTTTTGTGCCCACTTGGTTGATTCCAGCACTGAGTTTGTATTTTCTGCTATCTACTCCCCCTGT  
AAATTTGCCTCCTTTTGTCTAGAGCTTTTAGGTGTGCTGTCAAGCTCTTAGTGTGTGCTCTCTCTTGTTCCTTTTGG  
TGGCACTCAGAGCTGTTGGTTTTCTTGTGGGACTACATTCATTGTGTCCATAAGTTTGGGTATATTGTCCCTTCAT  
TTTCATTAACCTAAAAAGTGTAAATTTCTTTTTATTTCTCCTTGACCAAGTTATCATTGAGTAGAGTGTGTTTC  
AGCTTTCACATGAATGTTGGCTTCTATTATTTATGTTGTTATTGAAGATCAGCCTTCTCCATGGTGATGTGATAG  
AGTGTATGGGATACTTTCAATATTTTTGTTGAGTCTGTTTTGTGACTGATTATAGGTCTATTGTGGAGACGGTAC  
CATGAGGTGCTGAGAAGAAGTTATATGCTTTTGTGTTTGGGTAATGTTCTGTAGATATCTATTAATCCATTTGT  
TTCATAAATCTTTTATCTTCAATGTGTCTGTTTGTGTTTCTATTTCCCCGATCTCTCTATAGATAAGAGTGGATTGT  
GAAGTCTCCCTCTATTATGGTGTGCAGTGAATGAATGATTTGAGGTTTACTAAAGTTTCTTAAATGAATGTGGATG  
CCATTGCATTTGGAGCATAGATATTCAGAAATTGAGGGTTCATCTTGGAAAGATTTTGCCTTTCATGATCATTAACTGT  
CCCTTCTGTCTTTTTGATAACTTTGGGTTGGAAATTGATTTTATTCTATATTAGAATGGCTACTCCAGCTTATTCT  
TCAGACCATTTGCTAGGAAAATTGTTTTCCAGCCTTTTACTCTGAGGTAGTGTCTGCTTTTGTCCCTGAGGTGGGTT  
TCTTTTTTTTTTTTTCTTTTTTTTTCCATTGTTATTATTTTTATTTTTCTCATTACATTTCCAATGCTATACAAAA  
GTCCCCCATATCCACCCACCCCACTCCCCTGCCACCCACTCCCCTTTTTGGCCCTGGTGTCCCCTGTACTGGGG  
CATATAAGTTTGAAGTCCAATGGGCCTCTTTCCAGTGATGTCCGACTAGGCCATCTTTGATATATATGCAGC  
TAGAGTCAAGAGCTCCGGGGTACTGGTTAGTTCATAATGTTGTTCCACCTATAGGGTTGCAGATCCCTTTAGCTCCT  
TGGTACTTTCTCTAGCTCCTCCATTGGGAGCCCTATGATCCATCCATTAGCTGACTGTGAGCATCCACTTCTGTGTT  
TGCTAGGCCCCGGCATAGTCTACAAGAGACAGCTACATCTGGGTCTTTCAATAAAATCTTGTAGTGTATGCAA  
TGGTGTGACGTTTTGGATGCTGATTATGGGGTGGATCCCTGGATATGGCAGTCTCTACATGGTCCATCCTTTTCATCT  
CAGCTCCAACTTTGTCTGTAACTCCTCCATGGGTGTTTTGTTCCCAAATCTAAGGAGGGGCATAGTGTCCACA  
CTTCAGTCTTATTCTTCTGAGTTTCTGTGTTTGTAGCAAATTATATCTTATATCTTGGGTATCCTAGGTTTGGGGCT

AATATCCAATTATCAGTGAGTACATATTGTGTGAGTTTCTTTGTGAATGTGTTACCTCACTCACGATGATGCCCTCCA  
GGTCCATCCATTTGGCTAGGAATTTATAAATTCATTCTTTTTAATAGCTGAGTAGTACTCCATTGTGTAGATGTACC  
ACATTTTCTGTATCCATTCCTCTGTTGAGGGGCATCTAGGTTCTTTCCAGCTTCTGGCTATTATAAATAAGGCTGCTA  
TGAACATAGTGGAGCATGTGTCCTCCTACCAGTTGGGGCATCTTCTGGATATATGCCCAGGAGAGGTATTGCTGG  
ATCCTCCGGTAGTACTATGTCCAGTTTCTGAGGAACCGCCAGACTGATTCCAGAGTGGTTGTACAAGCCTGCAC  
TCCTAAAAACAATGGAGGAGTGTTCTCTTTCTCCACATCCACGCCAGCATCTGCTGTACCTGAATTTTTGATCTTA  
GCCATTCTGACTTGTGTGAGGTGGAATCTCAGGGTTGTTTTGATTTGCATTTCCCTGATGATTAAGGATGTTGAACA  
TTTTTCAAGTGCTTCTCTGCCATTCGGTATTCTCAGGTGAGAATTTCTTTGTTGAGTACTGAGCCCCATTTTTAAT  
GGGGTTATTTGATTTTCTGAAGTCCACCTTCTGAGTTCTTTATATATGTTGGATATTAGTCCCCTATCTGATTTAGG  
ATAGGTAAAGATCCTTTCCCAATCTGTTGGTGGTCTTTTTGTCTTATTGACGGTGTCTTTTGCCTTGCAGAACTTTG  
GAGTTTCATTAGGTCCCATTTGTCAATTCTCGATCTTACAGCACAAGCCATTGCTGTTCTGTTGAGGAATTTCCCC  
TGTGCCATATCTTCAAGGCTTTTCCCCACTTTCTCCTCTATAAGTTTCAAGTGTCTCTGGTTTTATGTGAAGTTCCTTG  
ATCCACTTAGATTTGACCTTAGTACAAGGAGATAAGTATGGATCGATTTCGATTCTTCTACACGATAACAACCAGTT  
GTGCCAGCACCAATTGTTGAAAATGCTGTCTTTCTTCCACTGGATGGTTTTAGCTCCCTTGTCTGATAGTCAAGTGAC  
CATAGGTGTGTGGGTTTCAATTTCTGGGTCTTCAATTCTATTCCATTGGTCTACTTGTCTGTCTTATACCAGTACCATG  
CAGTTTTTATCACAATTGCTCTGTAGTAAAGCTTTAGGTCTGGCATGGTGATTCCGCCAGAAGTTCTTTTATCCTTG  
AGAAGACTTTTTGCTATCCTAGGTTTTTTGTTATTCCAGACAAATTTGCAAATGCTCCTTCCAATTCGTTGAAGAAT  
TGAGTTGGAATTTTATGAGGGATTACATTGAATCTGTAGATTGCTTTGGCATGATAGCCATTTTTACAATGTTGAT  
CCTGCCAATCCATGAGCATGGGAGATCTTCCATCTTCTGAGATCTTCTTAATTTCTTTCTTTCAGAGATTTGAAGTT  
TTTATCATAACAGATCTTCACTTCTTAGTTAGAGTACGCCAAGATATTTTATATTATTTGTGACTATTGAGAAGGG  
TGTTGTTTCCCTAATTTCTTCTCAGCCTGTTTATTCTTTGTATAGAGAAAGGCCATTGACTTGTTTGAAGTTATTTTA  
TATCCAGCTACTTCACCGAAGCTGTTTATCAGGTTTAGGAGTTCTCTGGTAGAATTTTTAGGGTCACTTATATATACT  
ATCATATCATCTGCAAAAAGTGATATTTTACTTTCTTTTCCAATTTGTATCCCCTTGATCTCCTTTTGTGTCGAA  
TTGCTCTGGCTAATACTTCAAGTACTATGTTGAAAAGGTAGGGAGAAAAGTGGACAGCCTTGTCTAGTCCCCTGATTT  
TAGTGGGATTGCTTCCAGCTTCTTCCATTTACTTTTATGTTGGCTACTGGTTTGTCTGATAGTTGCTTTTATCATGTTT  
AGGTATGGGCCTTGAATTCCTGGTCTTTCCAGAACTTTTATCATGAATGGGTGTTGGATCTTGTCAAATGCTTTTTTC  
TGCATCTAATGAGATGATCATGTGGTTTTTGTCTTTGAGTTTGTATATAATGTATTACATTGATGGATTTTCGTAT  
ATTAACCATCCCTGCATCCCTGGAATAAAACCTACTTGGTCAGGATGGATGATTGCTTAAATGTGTTCTTGGATTCT  
AGTTAGCGAGAATTTTATTGAGGATTTTGCATCGATATTCATAAGAGAAAATGGTCTGAAGTTCTCTATCTTTGTT  
GGATCTTTCTGTGGTTTAGGTATCAGAGTAATAGTGGCTTCATAAAATGAGTTGGGTAGAGTAACTTCTACTTCTAT  
TTTTGAAATATTTGTGCAGAAATGGAATTAGATCTTCTTTGAAGGTCTGATAGAACTCTGCACTAAACCCATCTG  
TTCCTGGGCTTTTTTGGTTGGGAGACTATAATAACTGCTTCTATTTCTTTAGGTGATATGGGACTGTTTAGATGG  
TCAACTTGATCCTGATTCAACTTTGGTACCTGGTATCTGTCCAGAAATTTGTCCATTTCTGTCAGGTTTTCCAGTTTT  
GTTGAGTATAGCCTTTGTAGAAGGATCTGATGGTGTGTTTGGATTTCTCAGGATCTGTTGTTATGTCTCCCTTTTCA  
GTTCTGATTTTGTAAATTAGGATTTTGTCCCTGTGCCCTTAGTAAGTCTAGCTAAGTGTATCTATCTTGTGATTT  
TCTCAAAGAACCAACTCCTCGTTTGGTTAATTCTTTGAATAGTTCTTCTGTTTCCACTTGGTTGATTTACCCCTGA  
GTTTGATTATTTCTGCCGTCTACTCCTTGGGTGAATTTGCTTCTTTTTTTCTAGAGCTTTTAGATGTGTTGTCAA  
GCTGCTAGTATGTGCTCTCTCCGTTTCTCATGGAGGCACTCAGAGCTATGAGTTTCCCTCTTAGAAATGCTTTTAT  
TGTGTCCCATAGTTTTGGTACGTTGTGGCTTCATTTTCATTAACCTCTAAAAAGTCTTAAATTTCTTTCTTTATCCT  
TCCTTGACCAAGGTATCATTGAGAAGAGTGTTATTTCAGTTTTCCACGTGAATGTTGGCTTTCCATTATTTATATTGTTA  
TTGAAGATCAGTCTTAGGCCATGGTGGTCTGATAGGATACATGGGACAATTTCAATATTTTTGTATCTATTGAGGC  
CTGTTTTGTGACCAATTATATGGTCAATTTGGAGAAGTCCCTTGAGGTGCTGAGAAGAAGGTATATCCTTTTGT

TTAGGATAAAATGTTCTGTAGATATCTGTCAGGTCCATTTGTTTCATAACTTCTGTTAGTTTCACTGTGTCCTGTTT  
AGTTTCTGTTTCCACGATCTGTCCTTTGAAGAAAGTGGTGTGTTGAAGTCTCCCACTATTATTGTGTGAGGTGCAAT  
GTATGCTTTGAGCTTTACTAAAGTGTCTCTAATGAATGTGGCTGCCCTTGCAATTTGGTGCCTAGATATTCAGAATTG  
AGAGTTCCTCTTGGAGGATTTTACCTTTGATGAGTATGAAGTGTCCCTCCTTGTCTTTTTTGATAACTTTGGGTTGG  
AAGTCGACTTTATCCGATATTAATGGCTACTCCAGCTTGTTTCTTCAGTCCATTTGCTTGAAATTTGTTTCCAG  
CCTTCACTCTGAGGTAGTGTCTGTCTTTTTCCCTGAGATGGGTTTCTGTAAAGCAGCAGAATGTTGGGTCCTGTTT  
GTGTAGCCAGTCTGTTAGTCTATGTCTTTTTATTGGGAATTGAGTCCATTGATATTAAGAGATATTAAGGAAAAG  
TAATTGTTGCTCCCTTTATTTTTGTTGTTAGAGTTGGCATTCTGTTCTTGTGGCTGTCTCTTTTTGGTTTGTGAAT  
GATTACTTTCTGGTTGTTCTAGGGCGTGATTTCCGTCCTGTATTGCTTCTTTCTGTTATTATCCTTTGAAGGGCTG  
GATTCGTGGAAAGATATTGTGTGAATTTGGTTTTGTCGTGGAATACTTTGGTTTCTCCATCTATGGTAATTGAGAGT  
TTGGCCGGTATAGTAGCCTGGGCTAGCATTGTGTTCTTAGTGTCTGTATAACATCTGTCCAGGCTCTTCTGGC  
TTTCATAGTCTCTGGTGAAAAGTCTGGTGAATTCTGATAGGCCTTCTTTATATGTTACTTGACCTTTCTCCCTTACT  
GCTTTAATATTCTATCTTTATTTAGTGCAATTTGTTGTTCTGATTATTATGTGTCGGGAGGAATTTCTTTCTGGTCCA  
GTCTATTTGGAGTTCTGTAGGCTTCTGTATGATCATGGGCATCTCTTTTTTATGTTTGGGAAGTTTTCTTCTATTAT  
TTTGTGAAGATATTAGCTGGCCCTTACGTTGAAAATCTTCATTCTCATCAATTCCTATTATCCGTAGGTTTGGTCT  
TCTCATTGTGTCCTGGATTACCTGGATGTTTTGAGTTAGGATCCTTTGCACTTTGTATTTCTTTGACTGTTGTGTC  
GATGTTCTCTATGGAATCTTCTGCACCTGAGATTCTCTTCCATTTCTTGATTCTGTTGCTGATGCTCGCCTCTATG  
GTTCCAGATCTCTTTCCTAGGGTTTCTATCTCCAGCGTTCCTCGCTTTGGGTTTTCTTTATTGTGTCTACTCCCCTT  
TTAGTTCTAGTATGGTTTTGTTCAATTTCCATCACCTGTTTGGATGTGTTTTCTGTTTTCTTTAATGATTTCTACCTGT  
TTGGCTGTGTTTTCTGGTTTTCTTTAAGGGCCTGAACTCTTAGCAGTGCTCTCCTGTAATTTCTTTAAGTGACTTA  
TGAAAGTCCTTCTTGATGTCCTCTATCATCATGAGAAATGTTTTAAATCTGGGTCTAGATTTTCGGTTGTGTTG  
GGGTGCCCAGGACTAGGTGGGGTGGGAGTGCTGCGTTCTGATGATGGTGAGTGGTCTTGATTTCTGTTAGTAGG  
ATTCTTACGTTTGCCTTTCGCCATCTGGTAATCTCTGAAGCTAGCTGTTTTAGTTGTCACTGTTAAGAGCTTGTCTT  
CAGGTGACTCTGTTAGCCTCTATGAGCAGACCTGGAGGGTAGCACTCTCCTTAGTTTCAGTGGGCAGAGTATTCTC  
TGCAGGCAAGCTCTCTTCTGCAAGGCAGGTACCCAGATATCTGGTGTTGCAACCAGACTCCTGGCAGAAGTTATG  
TTCCATTCAGTAGAGGTCTTAGGATCACGTGTGGAATCCTGTGTGGGCCCTTGCGGGTGTCAGGCGACTCAGCTG  
GCAAGGTAGCCCGGGCTCGAGTGGAGTGAAAGGGGTTTGTGCCCCAGATCAAGCCCGGGTAGCCTACTTCCCT  
ATGTACCGCAGTCTCAAGTTCCTGTCGATTGGATTGGAGCAGGCGCTGTGTTCCACTCACCAAGAGGTCTTAGGGTC  
CCGTGGGGAGTCCCGTGTGGGCCCTTGTGGGTGTTGGGCAAGACTCTGCTGGCAAGGTATCCCGGGGCTCGAGT  
CTCGAGTCGAGCGAAGGGCGAGGTGGGTTTTCTTTATGCAGCAAATGTTGTGTATTGTTTATATAGCCAGTCTG  
TTAGTCTATTTGTTTTATTGGTGAATTGATTCCAGATTAAGGCAACTTCAGACCAACTCTTTTATGCATATCAATG  
CAAAATACTCAATAAAATTCTCCCCAACTAAAAGGGCTATTAGGTCCTTTTTCTGATAGTCAAACTGCAATGAGA  
ACTGCCAGTTTTCTAGTGTCACTGGCTAATTGCTATTAGATAGTAACTAGGCTTTCTCCTATTCAGAGCACATTCCA  
AGAGTTGTATAACAATTAACCAAAGGTATCAGAAGGGAATAATGATTTATTATAGGTTCTAGGGTAAAAGAT  
AAAATATTGATTGGTTTTACCTATACAAAATTCATAATATCATAATTATGGTTTGATAACTTCAGTGAACCTGTT  
GATCTGAGACAGTTGATGAACTTTGTAACATGAGGTGATGATTCTGAAATATTTATAAGTGCTGAGGACAAAGAG  
ACAAGGAAAATCGAGAGAGAAAAAAATTTTTTTTTTGCCTTCTCCACTTAGACTATTTTTTTTTTCTTTTACT  
CACTTAGAAGAATTTTTCCCTTCCGCACTTAGGATCTTCTGCTTTGCCCTTATATAAATTCATAAAAATATTTTTA  
TAACTTAGTAATAACTTCTATAATCACTTCTCTAAATTCCTTCTTCCAGTGACACCTGGCTTGTGGCTCAAAGTT  
AGAGCCCAGCAATTCCTGCTGAGCTAGAAAAAGGCTGCATTGCTTAATCCTCCTCTGTTAGGCTACAGGTGTTAA  
TCACCTAAGCCAGCCTACCCTCAGAAAAACCAAGTACTTTTTAGAAAGTTATCATCAGCATTTCAGTACAATTTGAGA  
GCTAGAAAGCCCTGAGACATTTGATTTTAAAGCCATTGCCAGGGTCTACTCTGTGACTCCACTGCTATCCTGGCT

CAGAGCAATCCTGGACCTCAAACCTCTAGTATAGAGCAGTAGTGATAAAAAAAAAAACCTACATGGTATTGATACA  
GAGACTGACAGATGGATCAGTGGACTAGAACTGAAGAACCAGAAAAGAAAACACACATTTATAGACACTTGATAT  
TTGGAAAGAAGTTATATATATATATATATGATGGAAAAAGAAAGGATTTTCAATAAATGGTGCTGTTCTAATTTGCA  
GTCTGTATGTTGAAAAATAAAAAATAAATCCGTACTTATCACCTTGCACAAAGCTCATTTTCAAGTTGATCAAGATTA  
TCAACATAAAATAAGATCCACTGAATCTAATAGAAGATAAACTCATTGACACAGAGAGGGAAATGTCCTAAAAACT  
ACTCCCATGGCTCATGCTCTAAGATCATCAATTCATAAATGTGACCTCATGAACTGGAAAGCTTCTGTAAGCAAAC  
CATATAGGCAATGGTACTAATCATCAACCTATAGACTGGAGAAAAAATCTCAACTAACCTCACATCTGATAAAGG  
GCTAATATCCAAAATATATAAAGAAGCTCAAGAAACGAAATAAACCAATCAAATATGGGGTATATATCTAAATAGAG  
ATTTCAAGACAGAAGAGTCTAAAATGGCTAAGGAACACTTAAAGATATGTTTAAAGTCCTTAGTGCTCAGGTTAAT  
TCAAATCAAAAACAACCTGAGATTGACTTTACACCAATCAAATTGGCTAAGATCAAACCTCAGATGACAGCACA  
TGTTCTGTGAAAATGTGGAGAAAAAGGAACACTCCTCCACTGCTGGTGGGACGGAAGCAGGTACAACCTTCTCTGGA  
ATTCAGTGTGGAGATTCTCAGAACATTGGAAATAGGTCTACCTGAAGACCCAGATGTACCACTCTTGGGCATATA  
CCAAAAGATGTCCACCATGCCCAAGGCACATGTTTTCTATGTTTCATAACAGCCTTGTTTATTATAGCTAGAAG  
CTGCAAATAACCCAGATGTCCCAAAACAGAAGAATGGATACAGAAAATGTGGCTCATTTACACAATGAAATACTAC  
TCAGCTATTAAGAAACGAAGACATCCTGAGTTTTTCAGGCAAATGGATGTAACCTGGAAATATCATTCTGAGTAAG  
GCAACTCAGAACCAAAAGGACATGCATGGTATATCCTCATTATAAGTGGATATTAACCAAAAAAGTGCAGAACA  
CCCTGTATTCAATCCGCAAACTTAAAAAGTTATCAAGCCACAAGTCCCAAGTGAGGACACCTCAATCCCACTTGG  
AAGGGAGAAAAAGAAATCACAGAGCGAGTGGGGGTGGTGGGAGGGTCTCAAGTGGGGATGGGGACCAGGAGT  
ACTAGAGAAGAACATGATCAGGTATTGGTTAGAAAAAATAAACTGAAGCCCTGAGGTACAGCAGAAAGAATG  
AAAACAGGCAACCTATGGAAGTATGGCGTTGGGGACCTCCAGAATGTACCAGAGCCCTGGGAGGTGAGAGACT  
CTCAGGACTCAAATGGAGGTATCTTAGATGAAATGCCCTACAGTGGGGAGTAGGAACCTGTAGATGGGAAGCAG  
GAACTTGTAGAATCCACATCCAGTAGAAAGATAAGGAAGGCATGAAGTGAAGTATGGGGTTTCCATCCCACGTCA  
AAAGCTCTGACCCAGAACTATTCTGTCAAAAAGAACTTCAAGAACAAAAACAGAGAAGAGCCTGATAGAAATGA  
GGTCCAGTGAATGGATCAAGGTGGGGCCAGCTTGGGGAAAGGCCCAAGGTCTTACACTACTACTGAGGCTAT  
GAAGTGCTCACAAAAGGGGGCCTATTATGACTGTACCCGAATGACCCAAAAGCAACTGGAAGAGTCAGGTGCA  
GATATTTACACAAAACCAATGGACAGAAGTTGCTGATCCCTCTGGTTCAATGAGGGAAAAGCTGGAAGAAGCTGA  
GGAGGAGGGCAACCTGTATGAGGACAAGCAGTCTCATTTAACCTGGATCTCCAAGACCTCTCTGACACTGAGCC  
ACCAATCAGGCAAAATATACAAGCTGACATGATGCCCCAAACACACATACAGCAGAGGACTGCCAGGTCTAGGTT  
TAGTCAGAGAAGATGCACCAAACCTCAAGAGACTGGAGGCCACAGACAGTCTCTTGGGTAGTTCTGGTGAGGTG  
GGGGTTGAAGACAATTTTGTGGAATTGGTGGCGGTGGTATGGAATGTGGAACAATCAGAGGGGGGACCTAGA  
GGGGTATAACACCTGGAGTATGAAGAAAAGATTAATAAATCAAAAAGATAAATAAATAAATAAATAAATAAAT  
AAATAAATTCTTAATGAACACTGGCTTTTAAAGGTTTCTTTCTTTGAGTACATTCTCTCTCTCTCTCTCTCTCT  
TCTCTCTCTCTCTCTCTCTCTCTCTCTCTCTCTCTCTCTCTCTCTCTCTCTCTCTCTCTCTCTCTCTCTCTCT  
GCTCCAGAATATTTATCAACAGTCACCTATTATTCTACCTATGTTTAGAAGGGGTGAGTCTCTGCCTCTTTAAGGTA  
TCTAAGGGAGTTTTTTTTTCTACAAAATTAATGAGAGTATTGTCCTGGAAATTTCCAATGCTTGTTTTGTAGT  
GTGTAGCACTTCTGATACTTACAGAGGAGTTCCTATTAATTGAAAATTTTGGCTCTGTGTATCAGAGGGAGAAC  
AATAAATGGAGAAAGAGAGGATAAGGTGGGAGTTCTCATTGTTTTTATTGCTGAGAAATAATCTATGCACTAGA  
CACACCAGTGCTTGGTCATTTCCAGATAAAACACCTGCTTTTAGCTATCAACGATTACAAACAAATATAGTAAAA  
ATATGTAAGTATATTTTGTGAGAATATGTTTTCCATTGATTAATTATCAGAAATAATATTTTTAGTCTCTGACTTA  
ATTTGTTTAGCCCTAGATATGAATCCCTGAAATATGTGTACTTGGGCTTTTGAATATATTGAGATAGCTATCCAG  
GCTCTATTCTAATTTATCAGAACAATGTATGTCAGTTATAATAAGTATATAATATCCCTAACATAATTAAGTAAT  
ATATAGATAAAGCAAGACATCAAACCTTATCCCTTAGAGATGCCAGACAAAGATAGCTGATAATAAATAAAGTCTG

AAAAGATAGTTAATAAAAATTTATATTTGTCCACTTTGGTGAAGTAAAACCCCTCTGCACAGATATTTCTTTCATGAT  
ATAGAATAGAGGTCCTAACTGTCGCAGGAACAGATTTATATAGTTTGTCAAAGAATTCTTTACAAGATTACAAAAG  
AGGTCGAATATAAATGACATAGTCTTTAGTTGAATTGACCTTTTATAAATAGAAATTTGACAAAAATAATATTTAC  
TCTATGGGTGCTTTCAAAAATAGAATGGTTTGCATGGAACAAGTTAGTATTGGAAGGATTAGAAGTTCGAAGCTAT  
CCTTGGTTACATTCTAAGTTGGGGCCAGCCTAGGCTATATGACATCCTGTCTGAAAATATGAAATTACTGGAACCA  
GTAGTTTATCTTTATGAATCCTCTACTTTGGATACTGAATCATGAGCAATATCAGAAGTACAAGGTCTATCAGTACC  
AGAAAAGTATAAAAAGAATTTCCCAAACAAAATAATTTAAGAGTTATTTTTAGGGGCATGATTATGTTGCCAGGG  
AATAAAGCACTTTGAGTTTAGAGTGGTCAGTAATGAGGAGTGAGTATTGCTCTTACACAGGACTCACATTGGTTA  
GCTCACAGTCACCTTTACCTTGAGGTTCCAGGAGGCCTCTGGCAACTGTGGGCATGTGCATTTCTTACATACATATG  
TACGTACGAACACATACACACACACACACACACACACACACACACACACACACACACACACACATTAAATA  
ATAGGGAAAAGTACTTTGCTTTATCTATCAGTTTAAAGGAAGTTTGAAGTTGAATGTACTTAAAAGAGGTGCCTCAT  
AACCAAAGTATGAAATCTGCTAGTCTCCACAATAGGTGACTCAGAGCCACTACTCAAATAAATTACACCCTATA  
AAATCAAATAACCTCATTTAAAAATGGGGCTCAGAACAGAAACAATGATTTCTACCCGAGGAATACCGAATGGCA  
GAGAAGCACCTGAAAAATGTTTAAATCTTAATCATCAGGGAAATGCAAATCAAACATCCCTGAGCTCCACCT  
CACACAAGTCAGAAATAGCTAAGATCAAAAATTCAGGTGACAGCAGATGCTGGCGCAGATGTTGAGAAAGAGGAA  
CACTCCTCCGTTGTTGGTGGGATTGTAAGCTTGTACAACCACTCTGAAAATCAGTCTGGCGGTTCTTAGAAAATT  
GGACATAGTACTACCAGAAGATTCAGCAATACCTCTTCTGGGCATATATCCAGAAGATGCCCAACCGGTAAGAA  
GGACACATGCTCCACTATGTTCCATAGCAGCCTTATTATAATAGCCAGAAGCTGGAAAGAACCCAGATGCCCTCA  
ACAGAGGAATGGATACAGGAAATGTGGTACATTTACACAATGGAGTACTACTCAGCTATTAATAAAGCATGAATTT  
ATGAAATTCCTAACCAATGGATGGACCTTGAGGGCATCATCCTGAGTGAGGTAACCCAAACACAAGAATCTCTC  
ACAATATGTAAGTACTGATAATTGGATATTAGCCAGAACCTTAGGATACCCGATACAAGATATAATTTGCTAAAA  
ACATTAAGTCAAGAGAACGAAGACCAAGTGTGGACACTTTGCCCTTCTCAGAATATGAAATGAAACACCCATG  
GAAGGAGTTACAGAGACAAAATTTGGAAGTGTGACGAAAGGATGGACCATCTAGTGTATGCCATATCCAGAGAA  
CCATCCCCTGATCAGCTTCAAATGCTGACGCTATGGCATACTAGCAAGATTTTGTGAAAGGACCCAGATATA  
GCTGTGTCTTGTGAGACTATGTCAGCGCCTAGCAATCACAGAAGTGGATGCTCACAGTCAGCTATTGAATGGATCA  
CAGGGCCCCAATGGAGGAACTAGAGAAAGCATCCCACGAACTAAGGGAATTGCAACCCTATAGGTGTAACAAC  
AATATGAACTAAGCAGTAACACGGAGCTCCTGTCTCAAGCTGCATATGTATCAAAGATGGTCTAGTCGGCCATCA  
CTGCAAAGAGAGGCCTATTGGACTTGTACTTTATATGCCCCAGTACAGGGGAACGCCAGGGCTAAAAAGGGG  
GAGTAGGTGGGTAGGGGAGTGGGGTGGGTGGGTATGGGGTACTTTGGTATAACATTGGAAATGTAATGAGC  
TAAATACCTAATAAAAAATGGAAAAAATAAATTACACCCTAGACATGTGCAGCCATGAGGTCCACTGGTAAACTG  
TGGATAGAGATCAATGGTAGAGCTATTGGATTATGTAAGGGGAGGCTTAAATAAAACTGAGAGAGTACAGTCTC  
GTGATATAAGCTGGCTTTTGTGTGTGGTATTATATAGTATTATAATCCTTACTTGCTTTCGAGATATATTCCA  
TATAGTTCAGACTGTCCTTTATCTCACTTAATAGCTCAATATGACTATGATCCACTGATCCTCCTGCTTTCATTTCCA  
GAACAGCTAGTATTAAGAGAGGTACCAGCATGCTCTACTTGATACAGTTTTAGAGATAAAACCCAAGGCTTCATG  
CATGAGAATAAAGTACTCTACCAAATATACTTCGCCAGCTGCAAGCCTCCTGTTAATGATAAGTCCAAGACAACAT  
TTCTTACCCTTAACACATCATGCCTATGGCTATAATCATTAAATGTCCTCTTCTGTCTAAATCAATATCAACTTCACACA  
AGCCAGAACCATTTGAGAATATTGAATTTCAATTGAGAAAATAACCCACCAAACCTTTTGCCTGGAAAAGGCTTTG  
TTGAATTTTATTAATTAATGATTTCTATAGAAGGATATCCAGTTGGCAGTATCAGCTCTGGACTGATGGTACTGGA  
TGCTATTAATAAAAAAAGTAGGATGATCAAACATGGGGAATATGCCAGTATGCAATTTTTCTACATGTCCTCTAC  
TTCAGGTCTTACCTGCTCAAATTCAGTCTAGGGTTTCTGGTGTGACTTTCATGTATGATGAATTACAACTGAAC  
TATGAACCAAAACATTTTCTCTCCAGTTGATGTTGTTCCATAATGTCTTATCACCTAAATACAATCCCTTACTAAGGC  
AAGTTAGTATGCCAATGTAGCTCATATGGAATACCAAGTACTGAATGTTACGGTGGTCCAGATAGAGCATAGAA









ACAGATGTTTCAAGCCTTTGTTTCATAAGGCTTCTGCTACTCTGAAAATGTTTATGCAAACATAAAACGCCAAAATA  
AAAATCAGTAAAGAAAATTGTATTTGAACACTGACATTCTTATTATGAACCACACATATGTAAAAAATTTAAAATA  
GTAACATAGATATTTATCTTGCTAACATTTAAAATATTGAGTAATGAAGTATTTGTGCATATTTACTGTCTTGAAG  
AGAATCTCAACAATTACCTTAGGCTTTTTTTTTTAACTCAAAGGTCTCCAATTATGGCTGTAGCTATGAGTATTAAC  
TACCATACCAGCAAGAATTGTTTTAGATATTTACAAGAAAATATTAGCTGGGATATAGGTATCTGCACCGTAGAT  
TTTGTAAGAAAAAGAAGAATAAAATATTAATAAAATAGAATATGTTAAAAAATTCAGTTTTGTTGCACATTTCTGA  
ACAGAAAAAAAATATCATGATTTATATACCATATATCCAGGATTATGTGCATAAGCTTATGTGTATTTGTGTGTGT  
GTGTCCGCACACACATGCACATGCACACACTTGTGCACGTATCTAACTTATTTCTAAACCTATAGCTTACTATAACT  
TTCAAATAAAATATGTTAACTCACAAAATGTCATGTTTACATGATATTAGTTCAATTTTTAGGGTAGAAACCTAGA  
TGTCAGAAAAGTTAGTATTTTTTATTTTATATTATGAAGATAGTTGTATACCCCTGTGTATTTTTACTTTTTCCCT  
TTAACATAGAAATGAATAATGGTTTGAAAATTTGGTACTTTTTCAAACTTTTTGTGGATTCCTGAGTTTTAAA  
TCATGCACCCAGTCCCCTTATCTCCTCATCACCTTGATTCCGCTTCCATCATTGCAACCACCCACCAGAATAAGA  
ATCTCATCCTGGAATTTATAATGTCACAGTGTATATCCACAGTGTGCACTTTTATCTACACTCTTTGTTTCCAAGTT  
GTTCATTTTAATGAGTCTAAGAGCTCTCTGCCTTCTACTATACTATCAGTACTAATGCATAACTGTAACCTCTCA  
GATATCCTGTTGTTGCCCTTTTTATGGAGATCCTGTAGTATGGGATCTGTAGGGTGGCCATTTAATCTACTTCAG  
CAGTTCACCAATGGGGTCAATGTTGTGGTGGGGCAATTCAAACCCAGGATCTGGGCCTGAGAGAGATCTGACT  
AATCAGACCACAGCTCTGCCACACTACCACATCTGGGAGAGATTTCTGCCCTTCCCAAGCTTCCCTTTCAAAG  
TTGCAGCCAAAAGGGGCAGAAACAATTTATGCTACCATACCCTCAGTGCTCTCTCATTTGTGCCCTGCCATCA  
AAGCCAGCTTTACTGTGCTTCCCAGACATGGTAGAGGGGTCATACTCTACAGTGCTACAGCAGGTAAGGGATGGA  
GCCAGGTCTAATTCTACTCCCTCTGAGCATGCTCACCAGTAACCCCCAAACCAGGGCCAACCTCCCTCCCTGCT  
GCTCAGATGAGGTGCATGGCCTAATCTCCAAGTGCTGCAAGAGGTGATTGGGCTCATGGCCCATCAGGGACAG  
CTCTCTTGCCAAGGGTGGTGAGGGCAGAAGGGATGGAAGGGTCTCTCCTTTGTCCAAACCACTGCACATCAAAC  
AAGAGTCAGGACCAGGTACCCATGCCATGCCACCAGGCAGCTCATCAGAAAGCCCCAAATCTAGGGCCAGCTC  
TACTCTGCTGCTCAATCAAGGAAGGCTGTCACTAGAGGCAGTTTTGAGATCATATATGCTCATGTCTGGCCAGTG  
TGTAGACAGCCTTTTTGCTGCCTGTGGATGAAAATTTATAGCTCTTGGCTTCATCTCCGGCTTAACAAAAATCTT  
CCTGAAAACCTACCATGATTTCTGGCAAGACAATAATGAAATTAACCTCTGAAACTGTAAGGCAGCCCCAGCAACGT  
TCTTTGCTTTATAGGAATTAAGTGTGGTCAAGTGTCTCTCATAACAACAAAACCTGAAATTTGACACCTTCCATCCT  
TACCCTCAATTCATCTCTAAATTTCTTTCCACATTCACATTTTATTTTATACTCTATGATAATGATTAACCGTCCA  
GGTAATAGTAAATAAACAGTAAATTAAGATTTCTTTTTGTGAATCTATTCAACATTTTATCATTTTTATCATAAA  
TGTAACACTGTTCTTGTTCAAATACAAATAAAATCTCAAAGAAAAATGAACTGTAATAAGAGGATATTAGCCAAA  
GACGTACAGATTTTCTAAGATACAATCCACAGAACTCAACAACTTAACAACAAGAAGGGTCCAAGTGAGAATGC  
TTCAATCACACTTGTAAAGGGAGAAGAAAGAAATCACACGAGGCAGAGAGAGAGAGAGAGAGAGAGAGAGAGAGAG  
AGAGAGAGAGAGAGGGAGAGGGAGAGAGAGAGAGAGGGAGGGAGAAGTGGTGGGAGATGGGAGGGGGAGGA  
AAAAATGAACACATTCAGGTATGGGAAGGCAGGAGAGAGAGGCCATGAGGGTTAGCAGCTCTCCAAGTCTGCCCT  
GCCAGAGCATAGGAGGAACCTCTGGCCAGATGTGGGCTATCCTTCCCTACCCTTCCCTCCCCTGCCCTCATTAGTTT  
CACATATTTGGTGCTAAATTTTCAATTTTTATGAAGTCTATGACAATCCTAGAACTAAGGTATCACAAAACCTGGTTC  
ATCCTTGTCTTCTGCAATGATCACTTTTCACTATTAATAAGAGCTGGAGTCTTATCATCCCTCCATGTTAAAATTA  
CCTAGGTCTAAGATTGCTGTTTTACTGACTGCATGTGCTGCTGTTCCAGTCCATGTCTCCATTCAGAGATCAAA  
AACCAGCAGCAGCCTTACTGACTGACTAGGACAATTGAGAATCCTGAAATGGGTTATTGGGCCAACTGGCTAATA  
AAGAAAAACCACTTGGGATGTCATGATTTCCATATTTAACGTTTGTCTGTGCAGGCTTGTGATAACTCATGGCCT  
GACTCCCAACAGACTTTACAACATTCATACACGAAGTAGACTTAGGGAGAATTTTGTATATGTCTGGGGAAAAGAG  
AACTGTGGCATATGGGGAACCAGAACAATTCTATTATGCTTTTTGGGATTGTGAAACATCGGGATAGAAGGCATC

AATGGAAAATTTTATTGCAGTCACCTGACAGGGGAGGGAATCTGAAGTTCAACTAAAGTTCACCAGCCTAGGAAA  
GCAGGAAAAGGGCTGGGAAACTGGGAAACCTTGGGGCCTCCGATTTTATATTATTGGGGGGAAAAACCTCAAAC  
TCATTTTACAATTAGGCTCCTGATAAAACCAATAGTAAACCCCTGAATGTGACTGTAGGACCAAACCGAATTTTG  
GCAAACACTAAACCTATACCAAGAGGTCTTGCCTGAAAAACCTATGCCAAAGTCTATTCTCAAACCAGTGTGTTGTT  
GACCTCCCAGTCCTTCCCAGCAGGCTCTGCGCCCCGTAGATCTGCTCTGGTCAAGGATGCTAAAAACCTTTCAG  
ATTTTGACCAGTTCCCAACCAGAGCTAACCATCTTCTGCTGGCTGTGTTATTATGCCAGAAACCTTTTTATGAAGA  
TGTTAGTTTTATGTCTAAATATAATGAGTCCGAGAGAGACTGCATGCATATGGTCCCAAGAGAAGAACCTTAAC  
CATAAGACCATATCAGGACAGGGGACCTGCCTGGGAAAAGTTCCCTTGTACATCAACATATTTGTAACCAAAT  
ACCCTCATGGTGCATTCAAATGGGTTATTTCCCCTGAACAGGCATGGTGGGCCTGTTCAACAGGGTTGACTCTG  
TGTGTGCATGGAGAGGTTCTTAATCCCCTACTGCAAAGGAGTTCTCTATTCTAGTCCAATTGGTGCCATCCATAAC  
CTATTATTCAGAGGAAATAGTGCTGAAGAACCTAATAGGGCATGTTGGGGGAGACCTCAAAGACAGAAGAGAG  
AAACTATTTCCCTAACGTTGGCTATAATTTGGGAGCAGGGCTACCTAGTGCAGGCACTGGGATAGCAGCTCTAAC  
ATTGTAAGAGAATAACTATACAGCCTTATATTAGATACAGATCAAGACAGCCAATGCTTAGAAAAATCCATTGCAC  
ACCTAGAGTGAAATGTAGATCCCTGGCTGAGATAGTTGAACAGAACATACAAGGGTTAGACTTTGTGTTCTGCA  
TCAGGGATCCACTTAGACTTGAACACTTTTTCTTTCTTTCTAGATATATTGGATTTTTGCTAATATTCATTATAGA  
ACAATATGTGAAATGTTCATAAAAAACATTCTAAATGTTCCATAACCTTCCCAAACACTGTCTCTACCTGGAGACC  
AACTGTTTAAATATATTAGCCTACTCAAATATTATATTCAAATCATAATAAGACTGAAGCTATGGTGACAGCTA  
GAGGCGTAAATTGCTTCTGAGTAAAATTTTCACTAAATGGACAACCTGTGACCATAGAACAGGCACTGAGTTAAC  
ATGTCAGTGGTGGGCATAAATATACCACCTCCTGTTTAAACGTGTACACTGTGTTTAAACTGTAAGACAGAATTTG  
CAACACCTATTCCCTGTTTGTCTTCCAATATTTTATTATTGAATAAAGCTTACTTGTCTGAACCTTATTACTTGTCT  
ATTTGGTTGTTATATAGGAGATAGTTGCCAGGCATATTACTTCTATGACTTCTACCTTTTTGATTGCTAGTCTTAGT  
TATTAACCTTACTGAATATTGAATTAAGTAAAAGCACTGGATATAAGTGAATTTTCGGTTTACTTACCTCAT  
TTGAGGTCTAAAAACCTATCCTAAATCTGGGACACATATTCTTGTGCTAGCCTATGTAAAGCACATAGAAGACCCCT  
TTGGTTTTTGCCTTTTTGTCTTCACTTCAAGGTATGCTTGTCTTTTGAAGTTTTAGAGTATATTTCTTTGAGAGC  
CCAACATATACTGAAGAACATCTGGGAAACTCAGTCTTGTGGACAGAAGATCTATTGGATTCTTTACTATCTGACC  
ATAGACATCTATTTTTAAATACCTGGGCTGGACCACAGTGTATAAATCCCTCTACAAACACACACACACACACAC  
ACACACACACACACACACACACATAATTATCCAGTTTTTTCTTTAAAGAATTTTACTACCATACCTAAAATC  
TTTAAATTAATTTATCTTCTATATCCAATTACTTTTCTGCTCCTGTTTTGAAGATATTCTAAACTATATCATACTA  
TCAATTTTACTAATTTTTATTTATTTTATTTCAAATGTGATCCCTTTCAGCATACTCCCTCCATGAGGCCCTACC  
ACACTTCCCTCATTCTCTAAAATGTTACTCTCCACCCACCTCTCTAGAATTCAACTTTTCTGGGGACATAAAGCTT  
CCACAGGACAAGCACACACCCTCATCGCACTGAGGCCAGACAATGCAATCCTCTGCTACATATGTATAGTAGGGGT  
TATGTACTAGTACATGTATGCTTTTTGGTTGGTGGCTTAGTACCTGAGAATTCTGAGAAATCTAGTTTTTTTATGTT  
GTTGTTCTTCCAATAGGGTTGTAATCCCTCAGTTCCTCAGTCTTTGATCAAACCTTCCATAGGGGTTCTGGGT  
TTAGACCAATGATTGGCTGTAAATATCTGCATCTGTCTCAGTCAGTTGATGGCATAGCCTCTTTTAGGACAGTCATG  
CCATGTTTCTGCTGAAAGCATATCTGGTCAATTAACAAATGGGACCTTCTGAAACTGAAAAGGTTCTGTAAGGC  
AAAGGACACTGTCAATAGGACAAAATGGCAACCTAGTAATGGAGAAAAGTTCTTTACTAACCTACATCTGATCGA  
AGGCTAATATTCAAATATACAAAGAATTCAAGAAGCTAGACTCCAAAAAAAAAAAAAAAAAAAAACAAAAACAAAA  
ACAAAAACAAAAACAACCTAATGAAAAATGAGCTCTAGAGCTAAACAAAATTCTCAATTTAGGAATCTCAAAA  
GCCTGAGAAGCACCTAAAGAAATGTTCAACATCCTCATTTATTGTGAAATAAAAATCAAACCACGCTGAGATTCC  
ATCCTAAACCAATCAGAATGGTTGAGACCAAATGTCAGGTGAAAATAGCTGCTAGAGCAAATGTAGATAAAAAA  
GAACACTTTATCTTTGCTAGTGGGATTGCAAAGTGTTCAGATTCCATAATCTGGAAAATATTCTGGCATTCTTC  
ACAAAATTGGAAATAAGTCTATCTGAATATTCATATATACAACCTTCTGGGCATATACCCCAAAATGCTCTACCATAT

CATGAGTAAACCTTCAGTGTTTACAGCAGCCTTAATTATAATAGCGGGGGTTCAGGGACTATGCCGAACTTAGGAA  
ATTAATCTGAACAGGAAAGAGAGTGCACCACAGAACTGGACAGCTTCTGGGACAGGCGGAGCCACAGAACCACT  
GAGGCAGCAGCCTTTTCAGGCAATAGAAAGCCAGCCACCCTCCCAACCAAAGGACAGGTATCTGCCTGGTTAGGA  
AGGCCTCAGCCTCAGGAGCAGCAGATGCCACTTTGGTTCTGGGACGCCACCCTGAACTTAGGAACTTAGTCTGCACA  
GGTGAGAGTGTGACTTCTGGGACCTGCCAAGCAACACAGCTTCTGGAAAAGGTCTGTTTTGGCCACTTCTTC  
AGCCAGGAGGAGGTCCAAACACAAGATAATCTGTGAACCTTCCCTGTAAGAGGAGAGCTTGCCAGCAGAGAGAT  
CTCTGAGCACTGAAACTCAGAGGAGAGAGTCTGTCTCCAGGTCTGCTGATAGACGGTAACAGAATCACCAGAAG  
AACAATCTCTAACAGAGTCAACTATAACAATACTCCAGAGATTACCAAATGGTGAAAGGTAAATGTAGGAATC  
TTACTAACAGGAACCAAGACCACTCACCATCATCAGAACCAGCACTCCCACTTCGCCTAGTCCAGGGCACCTCAA  
CACCCCGAAAACCTAGACCCAGATTTAAAAGCATATCTCATAATGATGGTAAAGGACATCAAGAATGACTTTAAT  
AACTCACTTAAAGAAATACAGGAGAACACTGCTAAAGAGTTACAAGTCTTAAAGAAAAACAGGAAAACACAATC  
AAACAGGTAGAAGTCCTTACAGAAAAAGAGGAAAACACATCCAAACAGGTGAAGGAAATGAACAAAACCACTACT  
AGACCTAAAAAGAGAAGTTGACACAATATAGAAAACCTCAAAGTGAGGCAACACTGGAGATAGAAATCCTAGGAA  
AGAAATCAGGAACCATAGATTTGAACATCAGCAACAGAATACAAGATATGGAAGAGAGAATCTCAGGTGCAGAA  
GATCCCATAGAGAACATCGGATCAACAATCAAAGAAAATGGAACATGCAAAAAGATCCTAACTCAAATATCCAG  
GAAATCGAGGACACAATGAGAAGACCAAACCTACGGATAATAGGGGTGGATCAGAATGAAGATTTTCAACTCAA  
AGGACCAGCAAATATCTTCAACAAAATTATTGAAAAAACTTCCCAAATCTAAAGAAAGAGATGCCCATGAACATA  
CAAGAAGCCTACAGAACTCCCAATAGACTGGACCAGAAAAGAAATTCCTCCCGACACATAATAATCAGAACAACA  
AATGCACTAAATAAAGAGAGAATACTAAAAGCAGTAAGGGAAAAAGGTCAAGTAACCTTATAAAGGCAAGTCAAT  
CAGAATTACCAACTTTTTACCAGAGACTATGAAAGCCAGAAGAGCCTGGACAGATGTTATACAGACACTAAG  
AGAACACAAATTCAGCCACGGCTACCATACCAGCTAAACTCTCATTACCATAGATGGAGAAAACAAAAGTATTC  
CACGACAAAAACAAATTCACATATTACCTTTCCACAAATCCAGGCCTTCAAAGATAATAACAGAAAAA  
AAAACTAGGAAGGGAACCTTGCCCTAGAAAAACAAGAAGGCTATCCCTCAACAAACCTAAAATAAAACAGCCAC  
AAAAACAGAATGCCTACTTTAAACAACAAAATAAGAGGAACCAACAATTACTTTTCTTAATATCTCTTAATTTCAA  
TGGTCTCAACTCCCAATAAAAAGATATAGACTAACAACTGGCTACACAAACAAGACCCAGCATTGCTGCTTA  
CAGAACTCATCTCAGAGAAAAAGATAGACACTACCTCAGAATGAAAGGCTGAAAAACAATTTCCCAAGCAAATG  
GTATGAAGAAACAAGCAGGAGTAGCCATCATAATATCTGATAAGATTGACTTACAACCCAAAGTCATCAAAAAA  
GACAAGGAGGGGCACTTCATTCTCATCAAAGGTAATAATCCTCCAAGAGGAACTATCAATTCTGAATATCTATGCTC  
CAAATACACGGGCAGCCACATTCATTAAAGAACTTTAGTAAAGCTCAAAGCACACATTGCACCTCACACAATAAT  
TGTGGGAGACTTCAACACACTACTTTACCAATGGACAGATCAAGGAAACATAAAGTAAACAGGGACACAGTGAA  
ACTAACAGAAGTTATGAAACAAATGGATCTGACAGATATCTACAGAACATTTTATCCTAAAACCTAAAGGATATACC  
TTCTTCTCAGCACCTCATGGTACCTTCTCCAAAATTGACCACATAATAGATCACAAAACAGGCCTCAACAGATACAA  
ACATATTGAAATTGTCCTATGTATCCTATCAGATCACCATGCACTAAGGCTGATCTTCAATAACAAAATAAATAATA  
GAAAGCCAACATTCACGTGGAACTGAACAACACTCTTCTCAATGATATCTTGTTCAAGGAAGGAATAAAGAAAG  
AAATGAAGGACTTCTTAGAGTTGAATGAAATGAAGCCACCTCATACCCAACTTATGGGACACAATGAAAGCATT  
TCTAAGAGGAAAACCTCATAGATCTGAGTGCCTCCAAAAGGAAAACCTAGAGAGAGCACACATTAGCAGCTTGACAAC  
ACACCTAAAAGCTCTAGAACAAAAGGAAGCAAATTCACCCAAGAGGAGTAGATGGCAGGAAATAATGAAACTCA  
GGGGCAAATCAACCAAGTGGAACAAGAAGAACTATTTAGAGAATCAACCAATCGAAGAGCTGGTTCTTTGAGA  
AAATCAACAAGATAGACAAACCCTTAGCCAGACTACTAAAGGGCACAGGGAAAGCATTCTAATTAATAAAATCT  
GAAATGAAAAGGGAGACATAACAACAGATCCTGAAGAAATCCAAAAACCTCAGTTCTTCTACAAAAGGCTAT  
ACTCAACAAAACCTGGAGAACCTGGATGAAATGAAGAAGTGTCTAGACAGATACCAGGTACCAAAGTTGAATCAAG  
ATCAGGTTAATGATCTAACAGCCGATATCCCCAAAGAAATAAAGCAAACCTTAATAATCTCCCAACCAAAAA

AAAAAAAAAGCCAGGACGAGATGGGTTTCGTGCAGAGTTCTATTAGACCTTCAAAGAAGATCTACTCCTAGTTCTG  
CACAACTGTTCCACAAAATTGAAACAGAAGGTACTCTACCCAATCATTCTATGAAGCCACAATTACTCTGATACC  
TAAACCACAAAAAGACCCACAAAGATAAAGAATTCAGACCAATATCACTTATAAATATTGATGCAAAAAATCCTC  
AATAAAGTTCTTGCTAACCAATCCAAGAACACATCAAAACAATCATCCATCCTGACCAAGTAGGTTTCATCCAGG  
GACGCAGGGATGGTTCAATATACGAAATCCATCAATGTAATCCAGTATATAACAACTCAAAAACAAAACCACA  
TGATCATCTCATTAGAAGCTGTGAACACATTTGACAAAATCCAACACCCATTCATGATAAAAAGTCTTGAAAGATC  
AGGAATTCAGGCCATACCTAAACATGATAAAAACAATCTACAGCAAACCAGTAGCCAGCATCAATGTAAATGG  
TGAAAAGCTTGAAGCAATCCCACTAAAATCAGGGACTAGACAAGGCTGTCCACTCTTCTACCTATTCAACATTG  
TACTTGAAATCCTAGCCAGAGCATTAGACAACAAAAGGAGATCAAGGTGATACAAATTGGAAAGGATGAAGTCA  
AAATATCACTTTTGCAGATGATATGATAATATGTATACGTGACCCAAAATTCACCAGAGAACTCCTAAGCCTGA  
TAAACAGCTTCAGTGATGTAGCTGGATATAAAATTAACCAATCCAGTCAATGGCCTTTCTTTCACAAAGGACAAA  
CATGCTGAGGAAGAAATTAGGGAAACAACACCTTCTCAATAGCCACAAATAATATAAAATACCTAGGCATGACTC  
TTAGGAAGTAAAAGATCTGTATGACAAGAACTTCATGCCTCTGAAGAAAAGAAATTAAGAAGATCTCAGAAGATG  
GAAAGATCTCCCATGCTCATGTATTGGCAGGATCAATATAGTAAAATGGCTATCTTGCCAAAACAATCTACAGAT  
TCAATGCAATCCCATCAAAATTCCACTCAATTCGTCAACAAATTAGAAAGAGCAATCAGCAGATTCATCTGGAAT  
AACAAAAACCTAGGATAGCAAAAATCTTCTCAAGGATAAAAAGAACATCTAGTGGAATCACCATGCCAACCTAA  
AGCTGTACTACAGAGCAATTGTGATAAAAATGCATGGAAGTATAGTGACAGACAAGTAGACCAATGGAACA  
GAATTGAAGACCCAAAGAAAACCCACACACCTATGGTCACTTGATCTTTGACAAGCAATCTAAAACCATCCAGTG  
GAAAAAGACAGCATTTCACAAATGGTACTGGCACAACCTGGCTGTTATCATGTTGACGATTGCGAATTGATCCA  
TTTCTATCTCCTTGACTAAGGTCAAATCTAATTGGATTAAAGAACTCCACATAAAACCAGAGACATTGATACTAAT  
AGAGGGGAAAGAAGGGAAAAGCCTCGAAGATATGGGTACAGGGGAAAATTCCTGAATAGAACAGCAATGGCT  
TGTGCTGTAAGATGGAGAATCGATAAATGGGACCTCATAAAATGCAAAGCTTCTGCAAGGCAAAGATGCCTTC  
AATATGACAAAAAGACCACAAACAGATTGGGAAAGGATCTTACCTATCCCAAATCGGTAAGGGGACTAATATCC  
AATACATATAAAGAACTCAAGAAGGTAGACTCCATATATTCAAATAACCCCACTAAAATGGGGCTCAGAACTAAA  
CAAAGAATATGCCCCAGTACAGGGGAACGCCAGGGCCAAAAGGGGGAGTGGGTGGGCAGGGGAGTTGGGGTT  
GGTGGCTATGGGGGACTTTTGGTATAGCATTGGAAATGTAAATGAGCTAAATACCTAATAAAAATGAAAAAGAAA  
AAAAAGAAAATATATATATCATAAAATCTGAAATATATAACCTAAGGTTGCTCTTTAAGTCTTGAAAAAAAAT  
AAAAACAAAAGTTATAGTAAGAAGTAATAAAATCAAAGGCAGACATGAATGTGAACTAGAGCACAGAATAAGGC  
AACTCAAACAAAAAATACATTCTTTTAAAGCTTAAATAATAAAATCAAATAAAAAGTGTAATAACAAAAGTGG  
GTGGTGAGTGGGAGATGCTAGATATACAAATGACATGAGAAAGAGAGACCAAGAGAGACGAAAAAAGGATTTT  
GGAGCTCTCCAGGAACAGAAGGAAATTTGGAGATGTACTGTTTCTTTGCCCATACAGGAGACATCCATAATT  
CTGGTTACATCAAGTTCTCTACCCTCTCTGTATTGTCTGTGTTGATGCACCAGTCTTCCATGTGTCAATTCTGTCT  
GTTTTGTTTTGTTGTCTGAACAACCTGTTGTTCTGTTTCATGTTGAATAAAAATAGTTAAAACCTAAAAA  
AAAAGTTCTCACCAGAGGAATACCGAATGGCAGAGAAGCACCTGAAAAATGTTCAACATCCTTAATCATTAGGG  
AAATGCAAATCAAACAACGCTGAGATTCCACCTTCACACCAGTCAGAATGGCTAAGATGAATAATTCAGGTGACA  
GCAGATGCTGGTGAGGATGTGGAGAAAGAGGAACACTCCTACATTGTTGGTGGGATTGCAAGCTTGTACAACCAC  
TCTGGAAATCAGTCTGGCGTTCTCAGAAAATTAGACATATTACCACCAGAAGATCCAGCAATACCTCTTCTGGG  
CATATATCCAGAAGATGTCCCAACCGTAAAAGGACATATGCTCCACTATGTTTCATAGCAGCCCTATTTATAATAG  
CCAGAAGCTGGAAGAACCAGATGCCCTCAACAGAGGAATGGATACAGAAAATGTGTTACATTTACACAATGG  
AGTACTACACAACCTATTAAGAGAATGTGAGTTTCTTAATTCGGATTCCAGATTTGGAGTATAGGGGATGTGATT  
ACTTGGCATTATTCTATTTAATTCATTACTTCAACCTGTCCACCTTCTTATTATTACACATCCCATATCT  
ACTGACCATCCACTGTATCCAAGAGCATGTCCCAAGCCACCTGATCTCTAACACCCAGGGGCTCTAGCCTCTG

AGACCTCAGTGCATCATCTCTGATTGAACAGAGATCAAATTTTTTTTTCAGTGTATATTTTGGGGATAATCTAATAGT  
TGGTATATGCTTCTGTTTGGTGGTCTATCATTGGGAGAATTCTGGTCCAGAATAATTGAGACAGCAGGTCCCTCT  
AAAGGGATACTCCTCTTCAGCCTCCTCAGTCTTTCTCCAATCCCAATGGTTCAGCAGATTCTGTCCATTGGTT  
GGTTGCAGACATATGCATCTGATTGTTTCAACTGCTCATTAGGTCTTCAGAAGTGCATTCATGCTAGTATTACATT  
ACAATTATGTGAATTCAGAAGCCAGCAGAGTTCGTGGACTGCAAGCAGGTCTTCTGAAAAGCAATGCATGATAT  
AATTACCTGAATTTTCTGGCAGTGTCTTCAATATTGTGTTCTACGTGATGCAATATCCACTCTCTTCTCTATCTCT  
GTCTCTGTCTCTGTCCCTCTCTGTCTCTGTCTCTCTGTCTCTTTGTCTCTCTCTGTCTCTCTGTATCTGTCTCTGC  
TCTGTCTCTGTCTCTGTCTCTGTCTCTGTCTCTGTCTCTCTCTCTCTCTCTCTCTCTCTCTCTCTCTCTCTCT  
TCTGTCTGTCTCTCAATATCTATTCTCTAACACTCAGTATGACTAATGATTCTTATCTTCTCTTCTACAAAGGG  
GATGATATTTAATGCATCTGCAAATTGTTATTCTGAATTGGAGTAGGGAAAGGACACTTTAAATCTGTTGTTACA  
CCCAAGAGCATGGCTTTTAAACCTGGTGAATCAGTAGAAGATGAGACAATGTATAGAAGAGGTTGCTCTTTTGC  
TTTGGTTTGGTTAGCTTTGTTATTTCTGTTACACGCAATCATTAGAAGAACTCTGTGAAATACTGCCTAATGCAA  
ATTTCTGAAGGAAAATAGGTACCTCAGAACCAAATTATTTCTCAGTTACAATATATAATATATATTATTAGAG  
ATATTTTTTTCATTAACCTTGAACAGAATTTTTCTCTGATCTTAACAAACTGCAAAGTACATGGGGGATAAAGGT  
GCACACTCTCAGGTGTGCATGGAATGACAATATGTTGAAGACCTTATTAGCCTCCATGTCCTTACCCTATGTACCAT  
CTTGAAAAAATAATGCTGAAAGTCAAGAAAATGGCTTACTTGAATATGCCAGGGAGATTTCTAACCAAATG  
TCACTGTGTATATCTCTAACACAAGGTAGACCTGGTATTGCAAGAGACAGTAAATGGCAGTAACATTGGTGCACT  
TAGGATATGGGCCTGTTCTAAGTGTACATCAATAACAACAAGAGAACGAAAATTTGCAGCCTAATTGCATAAAG  
GATATAGATATATCTATCTATTTATCTATAGATTAGATAGATAGATAGATAGATAGATAGATAGATAGATAGATAG  
ATAGATAGATAGATAGATAGATAGATAGATAGATAGATAGTATAATAAATACACAATGATACACACACACATA  
TATATATTATATAATATAACACTTATAAGCATATACATATAATACATATATACACATATCCATCTGTTAAACAAAT  
ATGATATATGATATTTGTGCACAGCAAGATTTTCAGTTTCATAATAATGATCACCTTTACATATAATCAAATGAATCT  
GACTTTTTTGTCTACTTCAATCTAATTTATATCACTCTTCATATATTAGAACTCTTGATACATTTAATAAATATCAG  
TAATCCTATTGCTGAATATAGAAAGGTTTGTCCATTTCTCTTCATTTATGTCTTGGTTATATTGTTAATTTTCATAT  
CCCATGTTATCTCCTGTTTGTAGATTTCCCCTGGAAATCCCTCATCTGACCACCTCACCTGCCTCTGAACCTGTGCTG  
TCCCATCAATTCACCACTCCATTTCTATACTAGAAAATCCTACCGCCTGATTTTACTGGACTTAGGATCAGTTATCT  
ACTTTCTCATTACAAATGCTATCTCTGTGAGATGTAACCTTTACTGTTGTATAGTAAATTTGATATTGGTAAATGAT  
CATGTCAAGAAAACTAACTACAATCAAGCAGGATTGGTCCAACAGATTGTATATGTTTCAGCAAGTTTACCCCAT  
CACTAGGTATTATGCCATTGCAACAAGTTAAGAAATGTTCTGACCCAAGTACAGCTGAAAGTGTGAGATGCA  
AACACTTGCACCAACCAATGTCTTGAAGCAGTTGAACACTATTGTTGAATTAAGTTTAAAAGATGGTGAAG  
AGGAGGGCAGCCCTGTAGAAGGACCAACAGTCTCAATTAACCTGCTCCCCAAGATGTCTAAAACCTCTGGACAACC  
AAGGAGACAAAATATGCCTGCTGATATGAGGCCTCAAGCACACATACAGAAGAGGATTGCTGGGTGTGTGTTCCA  
TCTGAATAGATGCACCTAATTTTCAAGAGAATGGAAGTTCCAGGGGTTTGTAGATTTCTGGTAGTTTGTAGAGGTGAG  
GTGTGGAGACATTTTGTGGAGAGTATGAGGTGTGAAGGAGGTATGGGATGTGGAACAATTGGAGGGTAGATA  
GGGTGGGAATAAAATCTGGACTGTAAATAGAAATAATTATAAAGAAAGAAAAAAGACAAAAGTTATTGCAA  
TTGCACTGAATTGTGGAATATTAGTGGAGAGTGGTGTGTTCAAGGGTTTTATTTCATTTTCTCTATAAAAATGCATT  
CATGGAAAGCAAGTATTAAGATTTTAAAGGATCCAGGACTATTTTGGAACTGTTTCAGAGAATGTTCTGCCAATGC  
TGAATATCTGAGTTCTGTTCTCTATCGTCTGCTGCTATTTCAACTGTTTTTGTGTCCCTTAACTGCAGTTTGAGT  
ATCAAGACGTTCTTTGCAAACATGACATTTTCAATCCAGTTTCAATGAGTAAATGTGGATTTTAAATGCAGGATGTA  
TTCCTTAAAGGGATGTTTCTGTGGAGACTAACATGAAGAGACATTTTTTTTAAATGATGATGCATTTTGTAGACCAAAT  
TCTCATGCTGTTGATGGATGAATGTGAAGGATTTAGTGTAGCTGCAAACATACACTTATCTTTTGGAAATGTTATT  
TTCTAGGATGTAGTAAATCAAATGTTGCCTCCATTTTCATCTATTTAGAATTTTAGGAGTCCAGGACCTCAATCT





GAAATGAGAAGAGATGAGAGGTATAGTTAGGCAGACACAGACAGAGAAACACAGACACACAGAGAGAGTCGTG  
CACATAAACATTCACACAGAGACACACAAGTAGGCACAGAGACAGAGAAAAATATACATATAAAGAGAGACATG  
CACAGAGACATTCACAGAGATACACACATTTACACAACCTAATTAAGAAGTATTTACAAAAATATATCTATGAAATT  
ACAAGGATATTAAGTACTAAATTATGTGAGCATTGAGGAGGAATGAGATCCAAACAAATTTTGAAGTCCTGCAA  
CATTCTGCATGCTTCCACACAGCTTTAGCTGTGGGAGTATCAGTTATAGGGCTGTAACTTTTGTTTTTTCATTTATA  
ATTTACTGTGAATCTCCTTTCTCCACCATTCAATATGGTCAGTAGTTTCCATGTGCAATGACTTTCCAATGCATGGCA  
TCTAGTGAGAAAGAGAAAACAATTTAAAAAAAAGAGTCTCTATGTTGGAGCCAAGTGTACAAACAATTTGTAGTT  
ATTCTCAAATGCAGGGCTCAAAGAAGTCTCAGAGGCTCCTCTAGCTTTTACACAGATCTTAAGTTTGGTCCCCCAGCA  
TCACTGAGAACCTATTGACAATTCTCACTCAGGTCATAAAGCTATGGAACATTCCAATGTATTGAGTTTCAGAGAAA  
AAGCCATTTGGAAGCTTATCTCTCTAAAAGTGAAGATTGCGCTGAAAATTATGAAAAGTGAGAATAATTTAAATA  
TGAAAAAACATTCACACACACACATTTAAAATAATACATGTAGACAAAATTGACAGCAATCTATATGACACAATAC  
CCACATACACGAGAGGGGAAGGGGCAGGGGGAGAGGTGGAGAGACATATGTATACTTACAATACTTTTTTTTTTT  
TTAGTCAAGTTGTCAAACTGACACAATCAATGTACAGGAAGAGATGTATATGGCAAACACTGGGGACAGACTGT  
CATGATAAGGACAGCATAGGAGGAAACAACAAGTTGATCTGTGGCATTGAGAGCCTGAATGGGCCCTTCTACATT  
TGTTTGGATTTAGAATCCAAGATTTAGTTTCAAGAACAGCCAGCTCCCTCCTGTCCCAGTGATCTACTTTTGTGGG  
GCACAGTCACAAAGGTTCCACAACATTTCTAGACAGTTTTCCAGTTTTAGACAACCTGGGACTGTGGGAGATATAA  
CCCCCCCCATCTAATTAAGTAAAGCCACGCAAATGCAAAATATTTTTGAAAACAGTTAATTTCAATTTGGAAAG  
AGAACAGAGAGCTCTATAATGATATGGACTGAATTAGTCTTTAGGTTCCATTGTGCACCCTAAATTAATATAGTG  
TAAAAGATTCTGTTTTCTATGTAGCAAGTGAGGGCTGAAAACAACACACTAATGGAGATAAAATGCAAAAAACTG  
GGATATACAGTAACAATTCAAAATGACACTGTGAAAAACGATGTATTTATACATGTTAACTGTCCTATTGACCACA  
GTGTCATTCATCATTGTGTTAGGGGATCCAATCTAGTGATTAATCATCAGGGTTTGACAGTAAATCTTTAGGCTCA  
ATACACCAGACATTAGCTGGAAAATGATTTACAAGAATGTAATGAACTTTGGTGTCTTCTGTGAATCTGTTGTAT  
GGATGCCCTGTCGTTGTTGTTTTAGTTGTTAGTGTGTTTTAAAATAGAAATATTGAATGCAAAAGCAAGTTGCA  
GGAGTCCAAAATGTCTTTGCATCCTCTCTTTCTCCTTCCATAACTTTCTAATTTCCCAATCCCCACATTCATTCAAA  
ATACAGAATTTCAAAAAATAAAGAAACTCATTATCATCTTTACTTTGTGCTTGCATGCTGGTTGCAATTATCTTGTA  
AGCATTAAAAATCAGGCTAACATACTGCCTATGTTCAATAGGGTTTTATTGATGTGAAGCCACATCATGACTCAAG  
AAACTTTATAGGGAAAATTAATTGATGTTGTCTTACAGTTTCAAGGGTCAGTATATTATTCTTGATAGGAAG  
AATGGCAGCATCCAGGAAGAGTCGGTGCTGGGGAAGGAACTAATTCGTCTATATCTTAGTCTGAAGGCAACCAGG  
AGGAAGTTTGTGGCCATAGGTAGCAAGGAAGAGGATCGATTTTTGTCACTGAGCAGAGATTGTGCACTACATAAA  
AGCAAGCCTACACAATGATACACTTCTCAAACAAGCCAACACCTTGAATAGTGCCACATCCCATGGGCAAAAGA  
TATTCTAATCAACACACTGCATCATAGGAAAATGGTAGAGAGACATAAAGAAAGATACTGCATGATTGCATTCCTC  
TAGTCACAAGTGCTACATACCTACACGTTAATATGCACACACACACACACACACACACACACACACACACACACAC  
ATAAACACACACACACACACACATAAACACACACACACACACACACACACACACACATGCCTATCTGATATGCATA  
ATAATAATGTGCAGTCTCGGGTCTGTGCGATTGGATTGGACCAGGTGCTGTGTTCCACTCACCAGAGGTCTTAGG  
ATCCCGTGGTGGATCCTGTGTGTGTCCTTGGGGGTGTCCAGAGACACCCTGGCAAGGGACCACGGTGTTCCTT  
GATGTACTTCTGTTGTCCAATTGCTCTGGCTAGGATTTCAAGTGCTATATTGAACAGATAGGAAGAAAGTGGACAG  
TCTTGTCTAGTCCCTGATTTTAGTCAGATTGGTTTTAGTTTCTCTCATTAGTTTGTGTTGACTACTGGTTTGTAT  
ATATTGCTTTTATTATGTTAAGTATGGGCCTGAATTCCTGATCTTTCTTGAATTTTATCATGAATGGGTGTTGGA  
TTTGTAAATGATTTCTCAGCATATAACGAGATGATTATGTGGTTTTGTTTTGAGTTTCTTATGTAGTGGATTAC  
GTTGATGTGTTTCTTATATTAACCATCCCTAAATCCCTAGGATGAAGCCTACTTGATCATTATTGATGATTTTTGT  
GATATGTTCTTGATTGATTTGCATGGACTTTATTAATATTTTTGCATCGATATTCATAAGGGAAATTGGTCTGA  
AGTCTTCTATTTGTTGGGAATTTATGTGGTTTAGTTATCAAAGTAATTTGGCTTCTATAGAATTAATTGAATAGAG

TACCTTCAGTTTCTATTTTATGGAATAGTTTCGGGACAGTTGGAATTAGTTCTTTTTTGAAGGTCTGATAGAACTCT  
GCACTAAACCCATGTGGGCTCTCCTGGGCATTATTTGGTTGGGAGATTATTAGTACTGCTTCTATTTCTTTAGGGG  
GTATGGGGCAGTTTAGATCTTTATTCTGATCTGGATTTAACTTTGGTATCTGATTTCTGTCTAGAAAATTGTCCATTT  
TGTTCAAGTTTTCCAGTTTTGTTTAGTATAGCCTTTTGTAGTAGTATCTGATGATGCCTAGGTTTTCCACAAGTTCTG  
GTCTTATGTCTCCCTTTTCATTTCTAATCTTGTTATTTAGGATACTATCCCTGTGCCCTGTAGTTCGTCTTGCTAAGAG  
TTTATCTATCTTGATACTATTTTCAAAGAACAGGCTCCTGGTTTGGTTGATACTTTGAATAGTTCTTTTTGTTCCCACT  
GGTTGATTCCAGCCCCGAGTTTGATTATTTTCTGCTATCTACTCCCCCTTGAAAATTTGCCTCCTTTTGTCTAGAGCT  
TTTAGGTGTGCTGTCAAGCTCTTAGTGTGTGCTCTGTCTGGTTTTTTTTTGTGGTGGCATTAGAGCTGTTGGTTTTCT  
TTGTGGGACTACATTCATTGTGTCCATAAGTTTGTGTATATTGTCCCTTCATTTTCATTAAGCTCTAAAAAGTGT  
AAGTTCTTCTTTATTTCTTCTTGACCAAGTTATCATTGAGTAGAGTGTGTTTCAGTTTTTACGTGAATGTTGGCTTT  
CTATTATTTATGTTGTTATTGAAGATCAGCCTTCGTCCATGGTGATGTGATAGGGTGTATGGGATACTTTCAATATT  
TTTTTGAGTCCTGTTTTGTGACTGATTATATGTTCTATTGTGGAGAAGATACCATGGTGTGTTTGAAGAAGTTATA  
TCCTTTGTTTTAGGGTAAATGTTCTGTAGATATCTATTAATCCATTTGTTTCATAACTTCTATTATCTTCAATGTAT  
CTCTGTTTAGAGTCTATTTCCAGGATCTTTCTATTGATAAGAGTGGGTTATTGAAGTTTCCCACTATTATGGTGGGC  
AGTGCAATGAGTGATTGAGCTTTACTAAAGTTTCTTAAATGAATGTGGATGCCTTTGCATTTGGAGCATAGATATT  
CAGAATAGAGGGTTCATCTTGAAGATTTTACCTTTTCATGAGCATTAAATTGTCCCTCTTGTCTTTTTTATATCTTTG  
GGTTGGAAATTGATTTTATTCTATATTAGAATGGCTACTCCATCTTATTTCTTTCAGACCATTTGCTTGGAAAATTGTT  
TTCCAGCCTTTTACTATGAGGTAGAATCTGGTTTTTTTACCTGAGGTGGGTTTTCTTTTATGCAGCAAATGTTGTGTA  
TTGTTTATATAGCCAGTCTGTTTGTCTATTTGTTTTTATTGGTGAATTGATTCCACATTAAGGCAACTTCAGACCAAC  
TTCTCTTATGTATATCAATGCAAAAATACTCAATAAAATTTCTCCCAAATAAAAGGGCTATTAGGTTCTTTACTGA  
GAGTCAAAAATGCAATGAGAAGTTCAGTTTTCCAAATGTCTCTGACTAATTGCTCTTTGATAGTAACTAGGCTTTC  
TCCTACTCAGAGCATTACAAGAGGTTGTATAACAATTAACCAAAGGTCATCAGAAGGGAATAATGATTTATTA  
TAGGTTCTAGGGTAAAAGATAAAATATTGATTGGGTTTACCTACACAAAATTCACATAACATCTTAGTTATGGTTG  
ATACCTCAGTGAACCTGTTGATCTGAGACAGTTGTTGAACTTTGTAGCATGTGGTCATGTATTCTGAAATATGTAT  
AAGTGCTGAGGACAAAGAGACGAGGAACATCTAGAGAAAAGATTTTTTTTTTGCCTTTCTCCACTTAGACTATTTT  
TTTTTTTCTTTTGCCTTAGAAGAATTTTTCCCTTTCCCACTTAGGATCTTTCTGCTTTTCCCTTATATAACTTT  
CATAGGAAATTTTTTATAACTTAGTAATAACTTCTATAATCACTTCTCTAAATTCCTTCTTCCAGTGACATCTGGTT  
AGTAGGCTCAAAATTAGAGCCAGCAATTCCTGCTGAGCTAGAAAAAAGGCTGCATTGCTTAATCCTCCTTAGG  
CTACAGGTGTTAATCACCTAAGCCAGCCTACCCTCAGAAAGACCCAGTACTTTTTAGAAAGTTATCATCAGCATTCA  
GTACAATGAGAGAGCTAGAAAGCCCTGGGACACTTAGATTTTAAAGGCATTGCCAGGGTCTACTCTGTGACTCC  
ACTGCTATCCTGGCTCAGAGCAATCCTGGACCTCAAATCTACTATAGAGAAGAAGTGATTAAAAAAAAAAAAAA  
TACATGGTATTGATACAGAGACTGACAGATGAATCAGTGGACTAGAAGTGAAGATCCAGAAAGAAAACCAAATAT  
TTATGGACCCTAGATTTTTGACAAAGAACCAAAAAAAAAAAAAAAAAACGATGGAAAAAGAAAGGATTTTCAAT  
AAATGGTGATGATCTAATTTGCAGTCTGTATGTTGAAAAATAAAATAAATCCATACTTATCACCTTACACAAAGCT  
CAGTTTCAAATTGAACACGATTATCAACATAAAATATGATACACTGAATCTAATAGAAGATAAACTCATTGACACA  
GAGAGGGAAATGTCCTAAACACATATCCCATGGTTTCATGCTCTAAGATCAACAATTCATAAATGTAAAAATAAAA  
CTATTTTAGATCATCTCCCATTAAATGTAACAATCACTGTAGTCATCAAATGGTTTCCATGTAAGATTTGAGGCAATT  
ACCATATTAACCATTTTTTTTTTAAATTTGGTTGGTTAATTGTTTGGGGGATTCAATTTGAAATGAACAGGAGATC  
ATTTCTGCCTGCGAACACGTGGAGGGAGTCAGTTTCAGGAAACAGATAGCTACTACAGATAATAAATAAATAAA  
TACTCAAATGAAGGCAATTTTTAAACCTTTTCATAGAATGGCAAAAAACACTTTAGTCATTTACAGACCAAAGCT  
AGAACCTCTTTGTAGTGTGGGCATTGGGCTTAGCAGCCTAGTCTCAGTATACTAACATACTTGGAAATTATCATAA  
AAAAATACACTGAATAGTTTGTCTTTAGATCTTTAAAAACCTCAGAAATACTTATCAAATAAAAGACTATAATAAA

TTCAACAGAATAAGTTTCATTTTCTTTCAACAAAAATTTAGGCTTTTTATAATAATAAATATTTGTTATGAGTAATTCT  
AGCTCATTTGGTCATAAATATATATGTTTTAGGAAAATAATTCTAAAACTTAAAATTTATGTTTTGTATTATTATG  
TATAACATTGGCAAATAAGATAAGACATGCTCATTGTTAACTCATAAATCTACTCCTATTTATTGAATCTTTTA  
AAAATCAGAAACCTCCCTAGGCAAGATCTTAACTAATGTTCCACTTATGCCATGACATTTTTAGCAGATATTTAA  
ATGTATTAAGTACTACTAATGAGTAGAAATCTGAAAGACCAGAATCTCTGTTACCTTTACATAATGATTCTATT  
CAATGTAACTATGACTACAATTAGAAAAATACCCAAATCCTAAAGTCAAATCCTCACCCTTTTATCAGTCATAGA  
AAATATTTAATAGCTATGGTACTGTAATCTGTAATCCAGCACTTGGCAGTTGAATGAAGGAGGATCAAGGCCTT  
TGACTGTCCATAGCTACATAGCGAGTTTGAGGTCAGCATGAGTAATGTAGGACTGTCTCAAATAAACTGTCCCT  
ACAAATCAAACAGAAATCTAATGTTAGTATAAAGATATAAAAAAGTAAATATTTCTGTCACTTCAGTAGGAAAATG  
TTGACCAGAAATACTAAAATAAATGTACAATTGCAATTTTTTACTATATTTTGAAGGGAAAATATTGAAATCTG  
GATATCCATAGAGTTCCCTGTTTAGAACATTATCCTGACAGCATATAGCCGAACTGGTAAGAAGCAAGGCTTGG  
AGAATCACAGGAGTTGCCTTGCCAGACTTTAGAGATGGCAGCAAATAACTGTAAGTATCACCTGTTTTTTTAGAC  
TGAGGAAGTTCAATTGATGATGACATGTTCCAATATAATAATAGAAAAACAAACAAACAAACAAATAAAAACTAT  
TATTTCTGCTTTAGATCTTGGCAGGGCCATTCTAGCCCCATCGTTTGACAAAAGCACAAACACAGCTCAGAAAATTGT  
TTTGATGACATCAACAATTGTCAGACTTAAATCTATCGATGTGCTTCAAACATCTCTCATCTTCTGGGGTTATACAT  
GGTGGTATTTATGAGACCTCTAAATGATCCCTAGGATTAGGAGCATAGTGTGTAGAGTTGGGAGTGGATATATAG  
ACTGGAGAGATAAAATGGGAAGCATGGTGATCCTTGGATTGCCTGTGCCACATACCTTTGCAGTTGTGACAATAG  
ATTCAGTGCAGATTGCCAATACCTTCTATGAGCACTACCTAGCACACAGTACAGTGCTTCTATTCTTTTTCCGGGC  
TTTTGCCTGTGAGAGGGAATGTAGCTTGGAACTACTGGTTGGTGTGTGGAAGATAAAAATCATTGGATCGGTTT  
AAAGCTATGGGAGCTGCCAGTTAATAGGCTAAGCTTCACTACATCCTTCCAATGGATAACTAGGGTCCAGTCTA  
GATGAATTTCTGGATCCCCAGGATACATGAATAGCATGCAGTATTCTAGAGTAGTATCCAGCTTAAATGATACTTCT  
GTTGCTCTTGTGCTTTCCCTCTTCTGTATCCCCAAGTTTATTCCGCTTCTTGGCATGACTCACAATGAGCATTGT  
GTATTAACCTGTGATATATGAGAGGAGTTGTCTGAATAGAGATGAAATATTGAGTCATGGCAAACAAAATGTGG  
AAATGGAAACCATCCAGGGGCAAATGTTGAAAATTAACATAGTCTGTGAAAGAAAATGCTTTTGCTTTCAGAAG  
GAGAGTGAATGGAGTTTTTCACTAAGCTGGAAGGGGGCTAATAAAGACCTTTTTTAACTGGAGAATTTAATAAGA  
ATTAACCAAACCCAGGTGCAATTATTCTTACAGGAGTGAAGTGGATAGATGGGTAGAGTTTGGCTAGTATAAGA  
TACTTGATTTAATGACTTTTGAGGTCCTTTTTCAAAATCATGATCAATAAATTCTGCCCTCTGTGACATTTCTACTATA  
TTTGTGTTGAAAGATGAATGAACTAGGATACATAGATATAACTTTATATTATAGTTCTTGAACCTTTCATGATGTGACA  
ATTAATCTGTATGATCAGGACATATTGTAGAGCTCTGCATTAGGCACACATAATCTATAGCTCCTGGGGACATAC  
ACGCAAATGAACAAACATGACTTTATAGTGTTCCTGTTTTCAGAATGGAATACATTTTATAAATAATCTAAAAGCA  
ATAGGTTCAAGTTTCTATGTTCTTAGAGATAGAACCTTAAAGACCCTAAAACTTAAAAAATAAAAAAGAAAAAG  
AAGAGAAAAGAAAATAAACTTGAAGCTTAAATAAACAACAAAAACCCTAAAAACAAACAAACAAACAAACAATT  
AAAAAAAACATAATTTTTTTGAAAAAATAAACTAAAAGAACCTAAAACCCTAAACAAACAAACAAACAAACAAC  
AAACAAAAATCTAGATCTCTACAAAGACCCAAAAAACAACAAAAATCATTACCACAAACAAACAAACAAACAAGG  
AAAGAACAATAACCACACTAAGCCTTAAAAAATAAATCTCGCCAAATACACTGAGAACAACCCTAAAATCATT  
AAAAAACGTAAAAAATAAACCCTAAAACAATAAAGCAAACCTAAAACCCTAAAAACGCTAAAATTATTAACA  
AACACTAAATGACCGAAAAAAGCTATTTTTTAACTTAATAAACATTTTTAAAACCCTACAATTCTATAAATAAGAA  
AACACAAGAACTTAAAAAGACCCTAAAAAATTATAAAACCCTAAGAAAAATCCAAAATCTACAAGTCTAGAT  
CCCTAATGAGACAATAAAAAAATAAATAAATAAATAAATAAATAAATAAATAAATAAATAAATAAATAAATAA  
AACTACAAATTCTTCTGCCTTAAAAAATCGCCAAAAACACTGGAAAAGAAAATCATTTTACAAACCTTATTAAAAA  
AATGCTTAAAAACAATTTTTAAAAAATTCCTTAATTAATTAATAAATAAATAAATAAATAAATAAATAAATAA  
TAAAATTCTAAAACAATCTCAACAACAGTAAAAAGACCCAAAAGAAGTGTAAAACCCTAAAAAAGTTTTTTTAA

AAGTTCTAAAAACACATCAAAACTCTGAAACTCAAAAAAAAAAACTTGAAAACCCGCTTAAAAAGCAAAACAAC  
AAAAACAAACAAATAAACAAACAAAAACAACAACAACAAACACCTACAATACCCTGAAACACTAACTAAAATCC  
TGAGACTATAAAAAACAACCTACCCCCCAAAAGGCTTACAAAACCCTGAAACATTAATACTAAAATCCTAAGATA  
CAAAAATAATCCTAAACCCATAAAAAAAAAAAGCAAACACACACACAAGAAAACAAAAAACCTTTACAAAATTCTAA  
AACCTATAAAACACTAAAAGTATAAAAAGAAACAAAAACAAAACAAAACAAACAAGAAGATCAAAAACAC  
ACAAAAAACTACAATTATCCTAAAATTATTCATAAACCCCTAAAAAGCCCTAAAAACCCTGAAATACCTTAAATTTCTA  
GGAGAAATCAAGATCTAAAATAAATAAATACATACATAAATAAACACATAAATAAATAACATAAATAAACAAACAAA  
CCTCAACCCTACAAAAACAAACAAACAAACAAACAAACAAACAAACAAACAAACAAACAAACAAACAAACAAACAAAC  
TTTAAAACCATTAAAACCCTAAAACCTAAATAACCCAAAGGGCTTTACCCTCCTGCACCCCCCAAAAAAAAAAAC  
CCGAAAACCTGTAATACTAAAAAGCCGAAAAAAAAAGCCCTAAAACATTAGAAGTAAATAGAAAAAAAAATCTAGA  
ATCTTTAAACAATACTGAAATAGTCCTAAAATCAAAAAAAAAAAAAAAAAAAAAAAAAAAGAAAAGAAAAGAAAAG  
AAAAAGAAAAGAAAAGAAAAGAAAATTCTGAAAACACACCTATCAGCTAGGCAGTCATTCAACTTACATATTTT  
AGCCTGCATCTGAGTGCTGGTATTAAGGGGAATAAACTATACTTGACTCCTTTTTGTTGTATAATTGTTTTCTA  
AAAGATTTTTTCTCTGTGGGTGAGTATATGTGTGTGTGTGTGTGTGTGTGTGTGTGTGTGTGTGTGTGTGTGTGT  
GTGTGTGTTGTCCAAAGAGGTCATCAGATCGTCTAGAACTAGAATTGCAGGTGGTTGTGAACAACCATGTGGGTG  
TTAGAAATTGAACCCTGGTCCTGTGCAAAAGCAATCAGTGGCCTAAGCAGTGAGCTATCTCCTCAGTCCTTTCTG  
CTTGCTCTAATCTCTACTTCACTATTATCTTGCCCAATATGTCTTTAATTCTTACTTCTTCTGTCTTTTTTCTGTGAT  
GAATTCTTATTTGCTTTTCTTTGCTTCTCCAATTACAGCACCAAGATTCTGCATTTCTTTTGTGTTTGAAGATTCTC  
AAGGAATCCTAAATCCAGATTTTAGGGCAGTTATTTAAAATTCTTGCTGGTGATTCTGACAATGGTTTCTCATTTTT  
TTAAAATTAGGTATTTTTTCAATTTCAATACTATCTCAAAGTCCCCACATACCCACCTCAACCACACCCCC  
ACCACCACCACTACATCTTGCCCTGGCATAACCCTGAATTAAGGCATATAAAGTTTGAAGACTGATGGGGCTCTC  
TTTCCAATGATAACCAACTAGTCCATCTTCTGATACAATTGCAGCTAGAAACATGAGCTCTGATATGCTGCTAGAAA  
AATGAGCTCTGGGGGTTTTCTTTAGTTCATATTGTTGTTCCACTTATGGGATTGCAGACCCCTTTAGCTCCTTGGGT  
ACCTTCTCTACCTCCTCCATTTCCGTCCCTGTGATTATCCAATAGCTGACTGTGAGCATCCACTTCTGTGTTTGCTA  
GGCCATGGCAAAGCCTCACAAGAGACAGCTAAATCTGGGTCCTCCAGCAAATCTTGCCAGTGTATGCAATGGT  
GTCAGTGTTTGGAGGCTGCTTATGGATGGATTAGTGGATTGAAAACCACTAATTTGGACACAATGGGGCTACTGC  
TGCCAATGTAGACTGTTTATCCAGTGTTGCTGGTCAGAAATCTCCGTTCTTTGAAGGCAATGGGTTTTCCAGAACA  
GGCTTCTTCTGAGTCCCCAACTTCTGTCAACACCTGTTACCTTGATGATGATCACTGATGTATCAAATGACCATA  
CTTAGTAAATTAGAGTAATACAGTTTTCTTTCCACCCTAGAAAGTGGGGATTCTAAAAATATGTGTACTAGCTAAA  
AGCAGTGATGGTGCTCTTCTAGGGTTCCTTACATAGTGTCTCCTTGATGTTCTCTCTGATCTATACTCACCATC  
TATGCAGCTTCTCTCATGAACAGCACACATGATAACACTCAACACATCTGATCTTCAGTCAGCAGAAATATACTAA  
TTATATTTCCCATATGGCCCAGTTGCTCATGATTCTGAGGCATAATCATACTGTTGTATTGCCAAACAAAATGACA  
CTAATTGTCTAGTATATAATGAAGCATATTTTGTATGACTTTTTCAGGAGTCTGTATATTCAATGATGAACACACC  
ATCAGCAAATGAGTGAATCTTGTGAGATGATGTATCACAGAGGGAACCAATGGGCTAGAAAGAGAAAAGAGA  
GAGCCAAACTCCCTTTCATAATTAACCTTTTCTATAACAGCATTATTAATTTATTTTATATGTAAGTCATATCCCTC  
CTGACCCATTCAATTTCTTCCAAATATATTCACACCTGGGGATTAATCTTCAGAAAATTATCTTGGGAAACACATGT  
GATTATTTCAACATCTATAGTAGTGTGGGGCATTATTCTCCCTACGTCATGTACACTTAAGATCTTTAGATACCTCC  
TTCCCTGTGATAGCCTTGACGCTCACTGAGTGACATGTGCATTTGATGATAAATGATACACAAACATTGAAGCACC  
TTACCATATCCTGTCACCCATATCATGTACAACATAGCAAGAACCACACCTGAGTTGAAAAATACAAATATATTTTA  
TAGTGTCTTGAAGCTAAAATCCCCAAATTAATCAAAATATTATTTGGACTCTGTTACTTTATACCAGTGTTTTTTAAG  
TGTACAAGTCGACGGCCTTTTCTGTGACCCTTTGCACAGGTTTATAGTGTCTTTTACCATCTTCATCCTCCCCACTA  
TCCTCCATTGGTATCAAATCTCCCCCTGCTGCTGCGCTTACTTCCAAAATACCTCCTATTTTTTAAATGCCTCTTATT

AAATTTATATTTTCACAATTGTCATTTTGAGTTTTACTTGTCTAACCTAATATATAGTATTTAACGTTCCATCCATTTT  
TTTGAAAACAAAGCCCTGCACTAATACACGTAGATGAGAAATATATTTCTCTCTCTCTCTCTCTCTCTCTCTCTCTC  
TCTCTCTCTCTCTCTCTCTCTCTCTCTCTCTCTCTCTCTCTCTCTCTCTCTCTCTCTCTCTCTCTCTCTCTCTC  
GTTGACATCTAAAATCACTCCATTGCATGTATGTTTCATACAGTGAGGCAATCAATATTGATGATATGGATATGTAG  
TGGTCCTTCTTAGATTTTTTTTTTTTTGAACCTAAATCAACCTGGGAAGATAGAATCTCAGATAAAGATCCTCCATCA  
CATTGGCCTGTGGCCACAATTAAGGAATGATTTTTTTTTATGACTGTTGTTGAAGGATCTAGCTCTCTATGGATAG  
TGTCATATTCTATGAAGATGATGTACAGGGTGTGGTGGGGACCGTGGAAATGACTGAAAACGATTTTTTTTTGAAG  
AACTGAAGATCTATGTGCCATGAACAATTAAGTGTCTCTAATTTGTAAGTAAATTTTATACATACCTGTGTCCAG  
TATTCTGTCTACACATATTTCAAACTAAAATTACCTCATCTATTTATCCTGTTTTACTGCATTTAATCTCTGAAATT  
CCTTGTAATCAGAAGTGTGGTAAATTTAAAAACCTTTAAAATATGACTGGGAGATATCAGGTTTGTTTAAATTT  
ATCACAACCTTTGTAAGCATGCCAAGATCTATGTTTTCTCTTACTTTCAAAGAATCCATAATTCATGATTGCCATT  
GGTTTCAATATATGTCATTTAACCTGTCAAATCCAGTTTTTTTTGCATAAAAATAGTTCCTCTAACTGTGGGTT  
TTCATAAAGTGAAAATTGGTGTGCTATCCAGTGTGCTGCCTCAAAGAGTCTGGCAATATTTATGATAAGAAGCACA  
GCTTAAAGATAACCAAGGGAAAGGTTGGAACATGAAAATAACCACCATGGATGTTGTCAAGTCAGAAACCGAA  
GACTTTCTCAGAACGAAAATAAAAACAAAATGAAACAAAACAAAACACAAACCAAATAAATAAAAATCCA  
ACAACCAAACAATAAAAACAATGCAAGGGTGAAATCTTTGGCAGAATATTACTCAGATCATCAGGCCTTTCAGTT  
GGGATTTCAATTTATTTCTAGGAGGCCATATGAAAAGTAAATTCGAGATGCTGAACGTTTCTGAGTGTAACATA  
GGGAAGGAACCAGCCTGAGAGGGGTTCTATGATGTAAGCTGAACTATGGTGTATGTCACAGAGCACTGGCTGGAG  
GTTGCGCATCTATTCCACTTGGAGGCACTAGAATCCATTGAAGGTGAGTTCACTATCTTCACAGTGGTGTGTCAAA  
GCCAGGTCATTTTTCCACAGGCTTTTGGTGCCTGGTCTGTATCAGGAGACAGAATCTTGACAACACTAGTATATTT  
TCTATGGGTAAGTATATTTATGTAGTAATTAGGACCCTCATAGCTACAGAAAGCTAAAATTTTCTCTCTACAGAG  
AGTTACTGTACAATTTACTTTCTCCATGTTTATTAGCTAGGGAGATGAATGGTCTAGGTTAGTTTATCTCCTGAATTT  
ATTATCCTTGCTAACAAATATCTAGATCACAATTCCATTAATAATGCCAAATCTCCTCTTTGTCCAAGTGCATGTTAGAA  
GATATTAGTTCTAAATGGCTGATATTGCCTCAAATGTTGAGTTGTTCTTGAGTTCACTGATGCAATGGCTTCATCA  
AATAATTTGAAAGCTGGGTGAGGAGAAACAATAAGAAGGACAGTGGTGTGCTGTGCCCTGGGAAGATATTTGT  
GAATGCAGGCACTTAGCTCAGTCCTTACACGTACAAGAGAGTCATGGTGACCCTTCTGGCCCTTTTATTTTATTTT  
CTCTTCTTGTGATCATTGGGTGTAATAGTCATAGCACAACCTAAATTGACATAGAATTTCAAGGAGATGATCCTCA  
TCAGAGACAAATTAACCTCAGGGCTGAAGAAATAAATATTGATCTGAGTATATTCTTCTGAGCTCTAGAGAATTACT  
TGTTAATTACACTATTTTTATGTCCTTGTTTTTTGTTCTTTGTTTCTTTGTTTGTGTTTGTGTTTGCCTGCTGGTTAA  
TTTTATTTGAGTTTCTGTATGTTTAGATTTGGCTGTCAGGAACTCACTGTGTAGACCAGACTAGTCTTTCTCTCACT  
AAGGTCTGCCTCACTCTGCCTCTTGTAGTACTATGATTAAGTTATGGGTCAACCACCTTCTTAACTTCTCCATT  
TGATTGTTTGTGTTGTTATTTTTGTTTGAATTTCTTTTTGTTTGTGTTTGTGTTTGTGTTTGTGTTTGTGTTTACTT  
GTTGTTGTTGTTGTTGTTGTTGTTGTTGAGACAGGGTTCCTCTCTATAGCACTGGCTTCCCTGGAACCTCACTTTGTAGAC  
CAGGCTGGTCTCAATTTAGAAATCTGCCTGTCTTGCCTTCTGAGTTCTGGGATTAATGCGTGTACCACCATGGC  
TGACTTATTAACCTCTATTTTTATAAAATTAATTTTAGGAGCTCAAATCTGTTTAGCATAGTCTTCTTCACATGCTCA  
GAAGTTCTCGTAGAGAAGAGTCTTGGTCCAGCATTCACTCCAACCATAACCATTGCCCATCAGGAATTCATATAT  
ATGACAGAGGCAACAGCATTGTGTCTGGCGTAAATGGGCAAGATCTTCAGTCCCAGGCAATGGGCAAGTATGATA  
TTTGAAGAGAATGGAAGCCACTTAGACAGTGTGATCTAGCACAACAGGTCTACAGCCAGGTAGAAGACAATACCT  
CTGAAGAGTCTGAGCATGACATCAAGAAGAAGAGTAGGAGGAAGCCTTCTTCCAGGCCCTGGGGAATATT  
GTTGGCTGCAGAATTTCTCACGGGTGGAAGGAAGTAATGAGCCTGTCACCCATTGGAAGGCCATCATTCTAGGT  
CAACTGCCAACAAACCTTCTCTTTATTTGGTGAAGTATGACGGAATTGACAGTGTCTACGGACAGGAGCTCCACA  
GCGATGAGAGGATTTAAATCTTAAGGTCTTGCCTCACAAGTAGTTTTCTCAGGTGAGGGATGTCCACCTCGC

CAGCGCCCTGGTTTGCAGAGAGGTACAACACAAATTTGAGGGGAAAGATGGCTCTGAGGACAACCTGGAGTGGGA  
TGGTGCTAGCCCAGGTGCCATTCTTACAGGACTATTTTTACATTTCTACAAGAAGGATCCGGTCCTCTACGTCTAT  
CAGCTCCTGGATGACTACAAGGAAGGTAACCTCCACATCATTCCAGAGACCCCTCTGGCTGAGGCGAGATCAGGT  
GATGACAATGACTTCTTAATAGGTTCTGGGTGACAGTACACCAGAGATGATGGATCCAAAAAGTTCCGGAAAGGTT  
GTTTACAAAGTTCTAGCCAATTCTACTGTGTACTTTATCAAATTTCTCGGTGACCTACATATCTATGTCTATACTCTG  
GTGTCAAATATCACTTAAATTAATAAAAAATCACAAAGTACAGAAAAGTAACTTATAGGATTGAAAAAATGTTTA  
TTTTCTGTGTTGGGTACCTATGGGTCTTTGACAACCTCAGTATCTTTGTCAATAAAATTTGTTTTGTTCTAAAAAT  
AATACGTGTGACATGACATGCTTTTAGTGAACACATTGTTGGAAGAGATGGACTATGGTGGAAAGAACATCAAAG  
CAAGATGAAAGTTGCATCGCAGGCTGTGAACAGTGCATACATCTAATATTGCACAGGCTAAAATGGACAGGACTT  
AGATTCTGTGGTCTGCATAGTGAGCAAGGAATTGGAGATATGACTTATTGGAGCAGGGATGGCAGCAAAGATG  
GATTTTTAGGAAGAAGGGGAGAAAGACAGGACATAGATAGAATCTCTGGAATGAAGTCTGAGGGAGAAACAACA  
AGTTGGGGGAAAGAGTGATAGATAAAAGGAATGTGCCCTTGTTACACAAAGTGAACCCAGAAAACCTGATCCAA  
AGAGACTCAGAAATCAGACAAAATCAGGTTTCATTTGAATAATGAAACCAAATGAACTTGTCTCTCATTTTAAGA  
TTTATTATCTTTATTTATATGGGTGGGTAGTAGCTTGAGAGTATAGGTGACCACAGAGACATGAGTTGTCAGATCC  
CATGGAGCTGGCATTAAAGCTGATTGTTAACCATTGGATATGAATTCAAGAAAACAAATCCAGTTTTTTGCGGTA  
CAAAAGTACTCTTGACAACATGGTCATCTCTATTCCATTAAGATATCTTTTTAAGAAATCCAATATTAACATGCA  
GAAAAGAGACCAGGTAGAAGTTAAGAAAGATTAATTTGATGGTAACCTTTAAAAACAATAAAGGACACACAAAG  
GAGTAAAGGACACTGAGGAACAAAAATTTTTAGATGAAGTTCTCAAATGTGAAGCAGGAGACCCAGGAAGAA  
TAGAAATTTTCTGCAAGTAGTTAAAATTGGACATATCCACATTAGGTTCTTTGGTTTCTTAACAATAGCCAGCCGA  
TCGGGTCAAATAGTAATTTAAAAGAGAAAATGAGTATACGGTGAGATAATATATGGTGGGGCATGGATCCTGACT  
GCTTCCCTGAGCACTCTTGCCTGGGATGAATCCTGTGATCTTTGGATGTCTCTGTGGAGTGCCCCAGATGACCA  
TCAAATGTTCCCATGGCCTGTTCCCTGGCTCTCCTCAAACATCTGACTCCCAACATACCTATGTACCATTTGAG  
CCTGTCTATTCCCTGGAATTCAGTCTTAAATTTATGTGTGACCTCATTCTCATAAAACAGTGAAGGTGACTCAAT  
GCATATGTGCTGACCTCTTTCTATGCCAGTTCTCATGGGTTCAAACCTCTATGAGGTTGCCAATATGTTGGTCACT  
ACTCCTGAGTAGCCCTGTGCTTCATGGGGTCTTACTGGGTCCATAAGCACTCTGAGTGTCTTTGTTGTTGTT  
GGTTTTATTGTTGTTGTAGTTTTGTTTTGTTTTGTTTTCTTTGGTTTTTTTTGTTTTGTATTTTTTTTTGTTTTGT  
TTTTAGTCAGGCTTGTGATGGACTCAATCATTGTGTTTTCTCTAGAATAAGTTTAAATGCCAAATGACTTGAAAA  
TACTCTCTATTGTTGATTAATTTTGGTATTTAAGAGAGTTTTGTGCTAGCTGGATGTCTTAATTAGGGTTCCAATGC  
TGTGAAAAATCACTATGACTAAGGCAACTCATTAGAAACATTTTATTAGGGCTTTTCAACATTTTATTGCAGTTTCA  
AAGGTTCACTCACTATCATCAAGGAAGTAAACATGCAAGTGGCTGGGAATATGTGGTGGTGGAGAGGAAGCTT  
AGAGTCTTCTGCATGCAGGGATGGTGTCTCCACACTGAGCAGAGCTTAAAGCCTCACAGTTATATGCTTCTCCA  
AAGAGGCTACACCTACTCCTATAAGGCCACACCTCCTCGTAGTCCAACACTACATTCAGAGTGCCATACTGGTTTCATA  
GAACTTGACAAGATCTAGAGTCTTGAAAGAGGAGGAGCCTCAGTTGAGAAAATGCCTCTTTAAGATCAAGCTGT  
AAGGAATTTTCTTAATTGGTGGGAGAGGACCCAGTTCATTGTGGGTGGTGACACCCTTGGTGGTAGTCTTGTG  
CTCCTCATGGAAGCAAGACTTAAGGAGCATGTCAATAAGCATCACCACTCCATGGCCTATGCATGAGCTTCTGGAT  
CCAAGAACCTGTGTTGTTTCAAGTTTCTTCCCAACTACTTTGATGATGAACAGCAATGTGGAATATAAGCTGAATAA  
AACTTTTGCTATGGAATAGCTCTTTGGACATGTTATGTCCTTACAACAATAGAAATTTAAGTAAGACAATTTCTT  
AGAGAAACAAAATATCTAATAGTACCACTGTCACTTATCCTATAAGGACAAATAATGTGTAGGTGTTTTATTTAAT  
TTAAAGGTAAGATATTCTCATGTATATAATGACATGCAATTGTTCTAGTTTGCATCTTCTCACACTGATGAATACTA  
ACATCAAACATAACTTGGGAATATAAGGGTTATTAGCTTACATGTTACAGACTATTACCAAGGAAGGCAAAACAG  
GAACTTGAAGCATTACCAGGAAAGAGTGCTTATTGCTTGACCCTATCTTAGTCATTGTTCTATTGCTGTGAAGAGAC  
ATCATGGATAAAACAACCTATTATGAAACAAAGCATTAACTGGGGGCTTGAATACACTTACAGAAGTTTAGTCCAAC

ATCAAGTTAGTGACCGCAGCACTGGAGCAATAGAACTATTGATCCTTAGACAGAGACAGATATTCTGCCATTACAT  
TGGTTTCTTGAAAACCTCAAAGACCACCCCTTATTGACACTACCACTTCTCCAATGAAGCCACATCTTCTCTCATTCT  
TCTAATCCTTAAACACACTGCCAATCCCTGGTGACTAAATATCCATATATATGAATCTATAGGGGATATTCTTATTCA  
AACCACCAAAAATCATGTGGCTTGATCAAATATTTTATTTAAATACAGAGTAAAAGCCTCCCTTTTATAAATGACTA  
CTGATGAGCTTACCCACAGTTGCCACCTCACACATCGACCATCAAGGAAGAAAATGTCCCATAGACTTACCCAA  
AAACCAAGTGAATAGAGACAATTCTTCAATTGTTTTCTCTCCTAAGGTGACGCTAGATTGTCAAGTTGGAGATAAA  
AAAAAATCCCAGCACATTAAGGTTTATCCTGCTCCATAACCCACACAAACATTATTCATCCCAATCTCCTCCTTCTGA  
CTAGGTATAGACCCACTTCCCTCCATGGCAGAAGTGAAGGGTAAAGTACCTCCAACAGCAAGAATACTCAATAATAG  
GTGACAAGTAGTGAATATGTCTTATAGCCTCACAACACCTACATTCTAATGTGTGTTACACTTTCTGGGAGACTC  
CAATCTGTCCAATCTCTGCCAAGTCAGCTTAAACCAGAAAAATCTCATCAATTAATCCAATGACTTTTAATTGAT  
TTATTTCTCTGAGGGAATGGAGTGTACCCTTCATGGATGTATTGGTGTCTGATTTCATAAGTAATAAAACCCACT  
ACTATTAACAGCTAAATCACAGGTGCTATGACAAATAACAACCTCACATGAGAAGCATCACATTTAGTTAAGCCTTTT  
CAGAAGTTTTATTGGAGTTTTATTTATGACTATATAAATCCATTGATTTATTTTAAAGTGTGTAATTTAATGAT  
TCTAAACACATCTCACCCTGTCATTTTTCACTCATTTTTCTGGTACTTCATATGATATTGAAATCTACTATAATACAA  
TAGTGAATTCAGAAAAAAGACCAGTGGTGTGGGTAGCAGCAAAGTTCCTGAGTCTCAAAGACAACAGATACCGTG  
GCTGAATATTCCAACACTACAACAACTAGGTAACATTGGTCTACACTTAGCATGCCGTTTCTAGAAAAAAAATTTAA  
GAATTAAGCCATGTTTCTCTGAACCTGACATGTTACTATCACAATGAAAGAAGGATCCATGATCACATGAATAT  
GAAAGGGGCATGAAGCAGCAAAGTTGTTCAACTATTGGCAGCTAGTCAGCATTAAACACAAGAAGGGACAAAGA  
CAATAAACAGCTTTGAAGACATGTCCAAATGACGACGTTCAATTTACAAGTTTTTTACCATTCCATGCACATTCATT  
GATTGATTAACCTATTGATTAAGCCCTCAGGTTCCAATCACTTTTCAGAGAGCATATTGACTACCTATGAACATT  
GTACTGTGGACCAAAGCCTTCATCAAAGACCCATGACTGACATTTCAAACAATTTAACCACAGAATTTCTTTATTTG  
AAACAAAGTGATAGGATCCATCTATCTTCAAGGATATCTCCGTTTTGTTCAAAGAACAATAATGCAATGCAA  
GTTCAGGATATTGATCACCTATCCATGCATCTTAAACCCATAGGTTCTAGCCAGAATGTAAGGTCAGAAGTCTAAA  
CTTACCTATACTACAACAACTCTGAAGATATCTAGCAATCTCCAGTTCTTTCTGGTACTTACCCACACCAAGTCT  
GCATTAAGGAATATAGTCTAGTGTGAGATAGTGCCAGCAGTTAATTGCAAAATCCCCTCTGAGTTGAGTTGTATG  
TAAACTCAGACATCTGTAATATAGACACACATGCATATTCACAAATACTCACAGAAAGAGGCAAGAAGTAGAGGA  
GCTGAATCTTAGAAATCCTCAAGGAAGAGAATGAAAATCTTGTAAGGCACAGAGGTAAGAGAAAAACTGTGTCTT  
TCTGCACAAAATCAGGCCATTCTTTCTTCCATCACTGAACGGGAAGGCTCACTATCACTTATCACTATCTGATAAGG  
TATAGACAGTTGATGAAGGATGAATAGTCAGTTTTATCAAAGGATTGACTTTGAAGGTGATAGATTGTTCAATC  
TCTACTGGAAGCCAGATGTCCAAGAGTTTATGGGAAACACAAATGATTTGAATGGGTTGTAACAAAGGGGAGAA  
GACGAGATATGAAGTTGGCAGGAGGAGATAGGTGGGAATGGGCCAGGTTTTGTTCTGGGAGGAGTTACTAAAA  
GAATTGAAAAGTAAATCCATCAAATATAGTGTATGAAATTCTCAAGGAATTAAGGAAAGTAGTTCTTAATATAC  
CATGTCTGACTGAACACACACAGACCCTTATATGTCCATCTTCTAAATAACAAATTCTTATACAGCAGTTTCATTA  
CATTGAGGGCAAAGTAATCCAGAGGTTATTTAAAATAAAGAAGAATCTGGGGAGATGTCCCAGGGGTAAAGCC  
AAGTGTGGTCAAACATTACCTACAACACCAGTGCTTAGGAATTGGAGTGGCAGAGACAGAAGGATGACTGTG  
GCTTCTGAATGTCAGCCTCACTCCTAGCTCAGCAAGAAACCCTGTCACAAGGGGAAAATTAGGGAGTGAAGTAG  
CAGAAAACAGTATACCCTCCCTATCCTCTGCACTTACCTGTATATTTCTGTATGCATACACACATCAATATGATTAC  
TGTATAAAAGAGGTTACTTTCCATAAATTATAGGCCAAAAGCAATGTTGTTTTAACCTAGAGACCTGAAGACTTTTAT  
ATCATTAGGGCCTGGAGAACTCTCCAGATATAGAGGATTGATATATCTTCTTCTGTGCTAAGGAAACCTCAGT  
TAAGTGTGTGTGTCAGTGACTTTAAACACCTTTCTTCTCTAGATTCTTATTAACCACAGAATGGTCTGTAATAA  
TGAAAATATGAAAATAAGACTTTTTAGGGTGTGCCTTCTTTAAAATCATATTTATAATTTTTACTAAATCGATG  
GGAAATCTTCTGCTCCAAGGAACAATGGATTCAATCCTGTTGACTTCTGTTTTATCCCATTATGAATAGGAATTAAT







TAATTTCAATTTTAAAAAGAGAACAGAGAGCTCTACTTTGAAATGGATTAATAGTCTTTAGGTTCCATTGTGCAC  
ACTAAATGAAATACAATGTAAAAGATTCCGTTTTCTATGTAGCAAATGGGGCTGAAAAGAACAACACTTATGGAGAT  
AAAATGCAAAAAAAACTGGGATATATAGTAACAATCAAACACTGACAGTGTGAAAACAATCTATTTACTTAACTG  
TCCTGTTGACCACAGTGTCAATTCATCATTGTGTTAGGGGATACAATCTAGTGATTAATCATCAGGGTTTGACAGTAA  
AATCCTTAGGCTCAATACACCAGACATTAGCTGGAAAATGATTTACAAGAATGTAATGCCCTTTGGTGTCTTCTCTG  
TGAATCTGTTGTATGGATGCCCTGTTGTTGGTTGTTTTAGTTGTTGGTGTGTTTTAAATAAAAAATATTGATTGCA  
AAAGCAAGTGACAGGTGCCAATAGGTCTTTGCATCCTCTCTTTCTCCTTCCATAACTTTTTAATTTTCCAATCCC  
CATATTCATTCAAAAATTCAGAAGTTCAAAAAATACAGAACTCATTTGCATCTTTACTTTGTCTTTGCATGCTGGT  
TGCAATCATCTTGTAAGCATTAAAATCAGGCTAACATACTGCGTATGTTCTACAGGGTTTCATTGATGTGAAGAGA  
CATCATGACTCAGGAAAGAACTCTTATAGGGAAAATTTAATTGAGGTTGTCTTACAGTTTCAGAGGGTCAGTACA  
TTTTGATCTTGGTAGGAAGCATGGCAGCATCCAGGTAGAGGAGGTGCTGGGGAAGGAACTGATTGGTCTATATCT  
TAGTCTGAAGACAACCAGGTGGAATCTTGTGGCCATAGGTAGCAAAGAAGAGGATCGATTTTTGTCACTGGGTAG  
AGATTGTGCACTACATAAAAGCAAGCCTACACAATGATGCACTTCTAAAACAAGCCAACACCTTGTAAATAGTGCC  
ACATCCCATGGGCAAAAGATATTCTAATCAACACACTGCATCATAGGAAAGTGGCAGAGAGACATAAAGAAAAGAT  
ACTGCATGATTGCATTCCTCTAGTCACAGGTGCTACATATCTACATGCTTATATGCACACACATGTGCACACACACA  
CACACACACATATCCTATCTGATATGTATGTCCATCCAAATTTATTTGTCTATTTATTTAATTACTTACTTATTTACTTT  
GTTTTAAATTTGTTTGTGAAGAACTTTCTACATACATGTAAATGAGTTTGAGCAAATCCATCACTATCTTCTCCTCT  
TGAAATGTTCCCACTTCTCCTGTATCACTCTTATCCTTAAGTCCATGTGCATTTTTATATAGATAGCTGAGTCCATTT  
AGTCCTGACTACATATGTGTGGGTAGGGACAAATATATACTGGAACACGGGGCAACCTTTCACTAGCCAAATCCATG  
AAGAAAATGGCCCTCTCACCTGAAGCCATTAATTTCCAATAACTCCTTTGTTGGGGGTGAAAGTTTCTGAGTCTCC  
CCAATCTATTCTTGATTTGTCTGTGAAAATTTGTTGATGGAACTTAGCCACGGTGAGTAACACACAAACACACA  
CACACACACACACACACACACACACACACACACACACACACACACACACACACACACACACACACACACACACAC  
GTCCAAAATTCATTCATTTTTGTTGAAACATTTGAATTCCATACGAGATCTTAATACTATCTGTATAAAAATTAGATT  
ATAACAATGAATATTTAAAATTCGGTGGATCTTTATGTGTTAAATAGCACCTACTGAACAAAATCCGTTAGTGCCA  
AAACTGATGGCTGCACAAAAAAAAGTGTAATCAGTGTCCAAAGGTAAGAATCCACAAGGTAAGGGGGTTG  
TCAGAGATTAAGGGCATGCAGGATAGTGTATGGAAGCTCTGTAGACCAAACAGGTATACCGTTAGCAAATAGCC  
TGAAAAATCTGCCATTCATTCCTTACAATCTTATACTAGGGAAAATTCAGGTGTAAGTACCCTCAAAGTGGGAG  
TAAGAAAACGATAATACTCCAGGTCTCTTGACTACTAAAAGGAGTGTGGACTGATATCTACAGTGTGAAAGAAT  
TTAGAAATGGCAATGTCCGTTTTTATCTTTCTGTGACAAAATTTGTTATTGAGGGGCTGGAGAGATGGCTCAGA  
ACCTTTGCACCCTCCCATCTGTCTCTAAGTCTGGGAGATCTGACTTCTTCTTCTGCCATTCCAGGTACTGCAGCCA  
TGTGGCATAACAAAACTACTTTATATATTTAAATGAGATATTTAGTTGTTATTAGTGCCCAAATTTGAGACTC  
TCTTATAAACATCATCTGTCAATTAATAATGTGTATGACAAATGAGCTGAGGAAGAAAATATGAGGTGAGACTTT  
TCAAAAAGAGAGTATTCTATGAAATATTAGGAGAATAAACAGATTCAGGGACCGATGCTGGCACATATGCTAAGG  
GAGATATTTAGGAAGATGCTAAGTAAATAGATAAAGGGGTAATAAAAATGTACAAAACATAAAAATATTTTGAAT  
GTGTTAAATACGTTATTCTGGGAATAAGCCACAGTTTGTGGCCAGGCATTTGTTAATAAGTAGTCTAAGACAAAA  
CTGTCTTTTTTTTTCTTACAAATTTTATTTTCTCCTCATTATTGTCATACAAATTTGTAAGATGCTAACATATGGACA  
TCATGAGTAGGGAATACAGGAAATTGCGAGTATCCTAGAGAATTCTAAAATAAATGTGTTTTTTTTAATTTGAAGTT  
GGTAGAGGTTTTGTTTTTTTTTAAATTTACATTTTAAAGTTTCAGTATATTCTAAAATATATGTGCTTATATGCACTG  
TAGAAAATATCTATGTGATGTAAGGAGACATTAATCAAATCTACTAAATTGCTTTCTGGATTGAGTTAGCTTTAGAC  
ACTGACAGCTGTGATGATTTAAGATAGGCAGCAGAGTGCTCACAGTATCACTAAGAGATGAACATTAGCTTGTGT  
CATATTCACCCCACTCACACATACATAAACACACACAAACACACACACACACATAAACACACACAACACTCACACA  
AACACACACACACTCACACACCCACACACACACACACACACAAACGCACACCAGCCATTGGAACACAAACCCAGTAG

TGACTCCCCTGACAGTTCTAAATATTTAGACACAGTCCCTAGTCAAAAAGTTCATGGAACTAAGTCTTCAGGAAC  
CATCCTGGAAAAATGCATCAAACCTGTCCTTACATTAGTAAGTGATTGAATCTTTGTGACTTCTTTCAATGTTGTTT  
TATTATAAGTGCCTCCAAGTAATGACTTGGCAAATATCTAAGCAATATCCAACCTTTGTTCCCTGTCTTCACCAATAT  
TCTAGGTAGTCCCTGAGCGGATCCTGGGCTTGGAAATCAGTAAGAATGTTACCTGTAACAACCAGAGTTACCTCTA  
GTATTATAAGAGAGATTGTGACAGCCATTGCTATATACTACATAGAGTTAGAAATCTCAGGACAACCTTTAGGAAAG  
TATGTTTAGAATATTTGTTATACTTATGCATGGCAGGCTACATTAGTTGTTAGTAGAAAGATTCCCCATACAATCC  
CTCTCACATACAGGAATTTACAATGGTTTAGGAAATAACTTGTGCTGTGGTTTGAGGGGGGAACAACAGTTTTGAAT  
TATTCATGAGAAGATTAGCTAGAAAGAACTCCCTAATTAGAACCATGGCTTGAGTGTGAAATCCATTTGCATGGT  
GTGATCATAAAGTGTCAAACCTAGCTTCAAAGAATATAGCTGACTTTAGAGAAGAATTCATTTAGTTATTTTATT  
GCTCAGTCCCTGCCAGTCAATTATGTTTTATTGCTCTATTTTGGACATGAGTCTTTAAGAATTCAGTAACCTCATTTA  
CCTGGCTGATTTGAAAACCAACTTCCCTATTTGTTTCTATATTAATAATCTGATGATTTCTTTGAGAAATTACATTCA  
GATACAGCACCCCTCTGTGTTTGTATCTGATTGACACTTAAATGTCAGCTTCTGCCACCTATACCAGGACAACG  
ATTTCTCCAGAGATTGAGGAGGGCTGATTGAGGCCAGTCTGCAGCAGGCCATCCATTAAGCAGTACCTAAGC  
TTTGGTTGTGGCTTCAAGAATATGCAACAGTGGCATTGGCTTTTGTATTTTCTATTTTAGCCATTCTGTCTAGTCTT  
CCCTATCCAGAACTTTTTTCTTTTCTGCATGTGTTTATGTGTGTGTGTGTGTGTGTGTGTGTGTGTGTGTGTGT  
GTGTGTGTGTGTGTTAAGAGATACCATGCGTGTGGCAATTATAAGAGAAAGAACAGTATATATGAAGGTTTTTC  
CTCTACATGTGCATGCAGACACTTGTGAAGCCCAAAGTGGATTAGGAAATGACCCTAATGTGTTGTCTATCTTTT  
CACTGAGGCAAGGTCTCTCAATTAGAGGAAAAGCTTCTGGTATGGGTCATCTTTCTAGACAGGTTTCTCTGGGCA  
TCCTCCCTGCATTCTGTGATCCTCTAATAGATGATTTCTACATCCACAGGGCATTATGTTAGTTTTGTAGGGAGC  
AAGTGATTAAGTCTAGGCTTTAGTCTAGCCCTTCCAAAACCTCTCTGTTGCAACTCTTTGTCACATTTCTTTTA  
GATGTATCAAGCGTGCTTCAACAACGAAACTGTATGAATTTGGTGTATGAGGCATGGGGTTCTGAAGAAAAGAA  
ATATTGAAAAATGATTCTTTTTTCTTTCTTTCAATATTACATTAGATATTTTCTTCATTTACGTTTTAAAATCAAGAC  
CATCCATCATCTCATCACCCATTCTATTTCTCTATGTCTCTGTCTCTGTCCATATCCACTCTGTCTCTGTCACTCTAAG  
ATCTATCCCTTGACATATTCCATATACAGAGAACCACCTGACAATTATTTTCAAGTTCAGTTCAGTTCAGGCTCCAAG  
GTAAGTTCAATTTAACCTGTACATTGTTGTACATTCTAGACAGTCTATTTCTCAAATAGAAAACCTAAATACATTTGTT  
ATCCTGTTAAAACCTCTAAATGGATACTTATTGTCCTGAGGGTAAGTTGAAAAGTCTTTCTGATGATAGTTGGATG  
CTATCCAGAAAGACAAAATGTTGTGTTCTACCATCCTGAATCTGAGAATACATTGGTTTAAATTTCTGGAATTTAAG  
AGAAAACAGGATTAACAAGACAATGAGAATATAAATCTCCCATTTCACTTAGAGACACATAGGTTATGGAACCT  
GCTGAACTCAAGTTTTCATGTGTGGTATGCAAGAGGGTTTCTGGCTTCATATGAGTGGAGTGTCTGTTCCCAATT  
GTGAGGTCACACCATGAACATACACATATGTTTCAAGATATGAGTAGAATGTCCTCACCGTTTGGTCTCTCAGAGTGT  
ATTACCCACCATTTTACGAGTTTGAATAGCCAGTACACTATTGGGATATCTACCTGTTCCACCCACAGTGTG  
CAGACATGAATAGAAATGCCTGGAATTTTACAGAGGTGCCAAGAATATATTCTCTCCATGGAGCCTTCTTTCCAGT  
GCCAGCAGGTTATTGTTCTTTTAAACCAATGCCATATCAGTAGAGAGATGAAAAGACATTACCCTGATATTCTA  
CTTTACATCCATGTTACAACAATAACTGAAATTTAAATATAAATTTAATGTATATCTAACTGAATCCAGATTATATT  
CTAATGAATGGTATAAATTGGTGTGGATCTAGATAAAATTATGTTGGGAGATTTTCCAGATAAAAACCTATGTTAGG  
AGATTTTGGCCTTTTTTATGGAGAACAATCCATATTTTGGGTAGATTAGGAGAACAATGTATGTAAATTAATGGA  
ACAAAAGAAAAACTCTGTTCCACTGTATTTCTTTGTAAAATGAACTTCAAATCATGGAATTTAGTTATATGTGTG  
TGTGATTTTTTAGTTATTTTTGAGTGTGCTGTTATGTGAACATGTGAGTTTTCTGGATTATGATTAAGAATTA  
GAGTATATGGGGCGTGGTACTTGGCAGTATTCTTTTTATTTAATTCATTCATTGAAACCCTGTCCACCCT  
CCTACTGTTCCACATGCCATATCGACTGGCCATCCCCTGTCTCCAAGAGCATGTACCATTCCATCTGATTTCTAAAC  
ACCCTGGGGTCTCTAGGTTCTTGAGAATCATTGCATCATTTCTGATTGAACAGAGACCAAGATTTTTTTTTTCTGTG  
TATGTTTTGGGGACCTTCAACTATAGTTGGTGAAGCTGCCATTTGGTTGTCTAGCATTTGGGAGAATTCTGGGT

CCATATTAATGGAGACATCTAGTCCTCCTACAGGTTGATCTCCTCCTCAGTCTCCTTCAGTTTTCTCCAATTAACC  
AATGGTTCAACATATTCTGTCCGTTGGTTGGTTGCATACAACCTTCATCTGATTGTTTCACTAACTGTTTGTCTTAA  
GAAGTACAGTCATGGTAGTATTAATATTACAAATGTGTGAATTCAGAAAAGTGCAGAGGTTGCTTACTGCAAGAA  
GGTATTCTGCAAAAAGCAATAGATGATAAAAAGTACTGAAATATCTATCAGTGCTCTACAATATTATATTCTAGGTGAT  
GAAATTTCTCTTTCTCTGTCTCTGTGTCTCTGTGTCTCTGTCTCTATCTCTATGTCTGTCTGTCTGTTGTCTCTCTC  
TCTCAATTTCTACTTCTCTAATACTTATTATGAATTATGATTCTTTTATCTTATTCCCTCCAATGGGAATGATATTGGA  
ATGGCATCTGTAACATTCATTACATTCTACACAATTTGTGCTTTCTATTAACAATCAACTAATATCAAAGTCACAC  
ATTCACTCAGATTACAAAATAAGATATCTGAGCTCATGTAAAGTGATTTCTGAATCAGAGTAGGGGAAGGGCACT  
TCCAATGTGTAGTTTCACTCAAGAGCATGGCTTTAAGAAGTGGTCAATTGGAAGAAGATGAGACAATGTATAGAA  
GAGGGTGTCTTTTGGTTTAGTTTGGTTAGCTTTGTTTCTTTAGGTTACCCACAGTCATTTTAAAGAAACATTGAGA  
AACACTGTTTATTACCGATATCTTGAAGTGAATGTGAATAGGTCCCTTAGAACCAACGTTATATTTCTCAGTTACAA  
TATGCAATATATTTTTGATATTATTTGATTCATTATCTAGTACATACACTACAACAAGTTTAAAGACATGTACCTCATT  
AGGAACTAGCAGGTGAAGGATTGAGCTGCAGATATTTGCAACCAACTAATGGACTGGAGCATCTGACGCTTGTG  
TTGAATTAACAAAGTTTAAAAAATGTTAAAAACAAGGGTATCCCTTAGGAAGACCCACAGTCTCATTTAAACTGTT  
CAACCATGAAGTCTGAAACTCTGACCCTTCAAAGATACAGAATTCACCTGCTCATATGAGGCCTCCAATACACATAC  
AGAAGAGGACTGCTGGTAGAACTCTACAAGTCCCTTTCCCAACTGGAGGGCATTTCATCTAAGGTCACTCCCTTT  
GAGTCTGGGAGTCTCTCAGCTCCAGGTCTCTGGTACATTCTAGAGGGTTTTCTCACCTCTACCTCACAAAGTTG  
CCTGTTTCCATTCTTTTTGCTGATCTTCATCAATGCACCTCTGTTTACAACCCCCACAGTACTTGATCAAGTTCATC  
TCTTCCCTCCGTGTGTGGTTTTCTCACCCAGGTCTCTCCCTCCCCCTTCTGTAGTAATTGTTAACCTTCTTAACATT  
TCTAATTTTTATCATAAAGATAATTGAATTTTTGATTCATTATCTTATAAACTCCCAATGCACTAGATACAATT  
ATCGAAGGTACATTTGTTTATTTCATTCATTTTAGTGTGAGGTAGGCACTTAGTATGTTATGTATTCTCT  
AGGAAGTGATAGAGTGTGCGGTTGAGCATTCCGTGTTGGTGTAATACAGGTATGTTTAAACATACCTGGCTTTA  
ATTGTTCTTCGGAAAATAGACCCAAAAAACTCCTATAACCACAATAAAATTTCCACAGGCAGTTCTGAGAGATGG  
AAATATTTCTGTTCACTTATAAAATTCATTGAAAGAAAGTATATTTGTTTCTTGAACCAAATAAACTGCTACCTGA  
GAGGAAGGATAAAATGACTGATTGGCCCTTTCTTTCCAGGACCAGCCCTACTCTCTGTTCCCATTGTACTTG  
ATGCTCCAGTACAGTGGAATCCAGGACAAAGAAATGGGAGTGAGTGGGTAGGGGATCAGGGCAGGGGGAAGG  
GAGGGGAAAGGCTAAAGGTGACTGTTATGATAGCATTGAAATGTAAATGGAGAAAATAACTACTAAAATTA  
AAAATTTAAAAAACATAAGTGTATTTACATATGTGCACAGGGATATGTGGCTAACAACCACATAATATAAAATTA  
TCATTCTTTCCAGGACTGTCTTTTTGTTTATTGTTTGTGTTTTGTTTTGTTTTGTTTTGTTTTGTTTTGTTTTTA  
TTATAAGTATTTTTTTTTGTATATCTATTAGTCTGGAAATTACTTTGTAACCTAGACTGGTCTCAATTTGAGATCT  
GCCTACTTCTCTTTCAAAAATTCGAAATATGTGTGTGCCCCACCACGTGGCTTCAAATTTTACTTACTAGT  
GAGAAGGTCCATTATTGTTTCTTGTAGGATATTTTAAATCATCAAGATGTCATTTTCTTAATATATTATAAGA  
TTAAATCCATTCTATAAAAATATGTCAGATATTTTTGGAGACAGGCAAGTTTGCAAGAAGCATCATTTAAAAATAC  
TTCTGGAGCCAGTGCCTTGAGCAGGCCATGCATGCAAACCTCTGAAGGCAGCCCCACAACACCGAGAGGCTGCTTC  
AATCCAAGGTACTCCAACATTCTAAGGATCAGATAATCAGACAGGAGGAAGAATCTGTCTCATCAACACATGGAG  
TAGCTGGAATCAGAAGGATCCAGGCATGCAGGAAGTGTGCCGACAAGTGGCATGGGTTATTTCTATTCTGTCTT  
GGCCAAGGCCCTGAACAGTCTTGAAGAAAACGCAGCAGCCAGCCCCATAACACCCAGAGTTCTAACATGGCCA  
GGTGCAGAGGATCTCAGGATCCAGGATCTTGGTCCCACCAGGATTCATGGTCCCAAAGGCAACTGACTCCCA  
GAAGATCAGACAGACCAAGGATATCTACCTTTTCTATAAACTCTTTATCACCTGTGAATACAGCCGAAACCTAGT  
TACATTTTTTTCAAGGCTTCTATCTCGTCAATTTTCTTTTCTCAGCCTCTCTTTTTTTATTTGTCTTTTTTTCTTTTTCA  
GTCTCAATCTTTTTAATATATTTTATTAGGTATTTTTTTCATCTAAATTTCCAACACTATCCCAAAGTCTCGCATA  
CCCTCCCCCTCCCCACTCCCTTACCCACTCACTACCACTTTTTGACACTGGCGTTCCCCTATACTGGGGCATAATTA

GTGTGCATGCCAATCGGGCTCTCTTCCAGGGATGGCCTACTAGGCAATCTTTTGATACATATGCAGCTACAGTC  
AAGAGCTTTGGGGTACTGGTTAGTTCATAAAGTTTTTTTACCTAGAGGATTGCAGATCCCTTTAGCTGCTTGGATAT  
TTTCTCTAGCTCCTCCATTGGGGCCATGTGATCCATCCAATAGATTACTGTGAGCATCCACTTCTTTGCTAGGCCCG  
GTATAATCTCACAAGAGACAGCTATATCAGGGTCCACTCAGCAAAACCTTGCAAGTGTATGGAGTGGTGTGAGTG  
TTGGGAGACTGATTAGTGGATGGATCCCTGCATATGGCAATCTCTAGAAGGTCCATCCTTTTGTCTATGCTCCAAAC  
TTTGTCTGTAACTACTCCCATGGGTGTTTTGTTTCCAATTCTAAGAAGGGGCAAGTGTCCACACTTTGGTTTTCGT  
TCTTCTTGAGTTTCATGTATTTGGCAAATTGTGTCTTATACCTTGGGGTATTCTAGGTTTCAGGGCTAATATCCACT  
TATTAGTGAGTACATATCATTAGCATTCTTTTGTGATTGAGTTACCTCACTCAGGATGATGCTCTCCAGGTCCAACC  
ATTTGCCTATAAATTCATAAACTCATTCTTTTCAATAGCTGTACTAATAGTAGTAGTACTCCATTGTGTAATGTAC  
CACAATTTTGAAACATTTTCTGTTGACAGGCATCTGGATTCTTTCCAGCTTCTGGCTACTATAAATAAGGCTGCTCT  
GAACATAGTGGAGCATGTGTCTTACTAGTTGGAACAGCTTCTGGATATATGCCCAGGACAGGTATTGTGTGAGCCT  
ATGGTAGTACAATTTCCAATTTTCTCATTCCAGAGATGATTTAAAACCTGCAATTCACAACAATGGAGGAGTTT  
TCTGCTTTCTCCACATCCTTGCCAGCATCTGCTGTCATCTGAATATTTGATCTTAGCCATTCTGTCTGGTGTGAGATG  
GAATCTCAGGGTTGTTTTGATTTACATTTCACTGCTGATTAAGGATGGTGAACATTGTTTCAGGTGCTTCTTAGCCA  
TTTGGTATTCTCAGGTGAGAATTTCTTTCTTAGCTCTGAGCCCCATTTTTAAATGGAGTTATTTGATTTTCTGGAGA  
CCACCTTCTGAATCTTTATATATATTTGATATTACTCCCCTATCTAATTTAGGATAGTGAAAGATCCTTTCACAATCT  
GTTGGTGACCTTTTTGTCTTATTGAAGGTGTCTTTTGCCTTACAAAAGATTTGCAGGTTTATGAGGTCCCATTTGTCA  
ATTCTAAATCTTACAATACAAGCCATTTGTCTTTTATTAGGAATTTTTCCCCTGTTCCCATATCTTTGAGGCTTTTCC  
TCATTTTCTCCTCTACAAGTTTCAATGATTTTTATCTGGAGCTCCTTGATCCACTTACATTTGACCTTAGTACAAGG  
AGATAGGAATGGATTGATTCACATTCTTCTACATGATAACCACCAATTGTACCAGCACCATTTGTTGAAAATGCAGT  
CTTTTTTCCACTAGATGGTTTTAGCTCCCGTGTAGATGATCAATTGACAATAGGTGTGTTGGATCATTCTGGGTTTT  
CAATCATATTTTATTGGTCTACTTGTCTGCTACTATATCAGTACCATGCAGTTTTTATCACAATTTGCTTTGTAGTATA  
GGTTTGGGTCAGGTATGGTATTGCACCAGAGGTTCTTTTATCCATGAGAAGAGTTTTTGTATCCTAGGTTTTGTT  
TATCCCAATGTATTTGCAGATTGCCCTTCTAATTCATTGAAGAATTGAGTTGGAATTTAATGGAGATTTTATTGA  
ATCTGTAGATTTCTTTTGAAGATGGCCATTTTACAATGTTGATACTGCCAATCCATGATAATGGACGATCTTTCC  
ATCTTCTGAGATATTCTCTAATTTCTTTCTTTAGAGACTTGAAGTTCTTATCATAGAGATCTTTCCCTCCTTAGTTAA  
AGTCACTCCAAAGTATTTTATATTTTGTGACTATTGAGAAGGGTGTGCTTCTTATTTTCAATTTTCAAGCTGTTT  
ATTCTTTGTGTAGAGAAAGGTCATTGATATGTTTGAATTAATTTATATCCAGCTATTTCACTGACGTTGTTTTTCAAG  
TTTAGGAGTTCTGTGGTGAATGTTTAGGTTCAATTTATATACTATCATATCATCTGCAAAAAAGTGATATTTTGA  
TTTCTTCTTTTCCAATTTGTATCCCCTGGACTCCTTTGTTGTCAAATGCTCTGCCTAGGACTTCAAGAACAATGTT  
GAATAGGTAGGGAGAAAAGTGGGCAGCCTTGTCTAGTCACTGATTTTGTAGTGGGATTGCTTCCAGCTTCATACCATT  
CATTTGATGTTGGGTACTGGTTTACTGTAAATTGCTTTTATCCTGTTTATGTATGGACCTGTATTCTGATCCTTCC  
AAGACTTTTATCATGAACGGTTTTTGGATATATTTAAATGATTTATTTGCATCTAATGAGATGATCATGTGGTTTTG  
TCTTTGAGGTTGTTTATATAATGGATTATGTTGATAGATTGCCATATATTAACCATCCCTGTATCCCTGGTATAAAA  
CCTACTTGGTAAGGATGAATGAAATTTTAAATGTGTTCTTGGATATGATTAGGGATAATTTTACTGAGTATTTTGT  
TTCGATATTCATAAGGGCCATTGTTCTGAAGTTCTTTATCTTTGTTGGATCTTTCTGTGGTTTTAGGTATCAGAGTAAT  
GTGGTTTCATAGAATGAGTTGGGTAGTGCATCTTCTACTGCTATTTTGTGGAATTGTTTCATGCAGAACTGGAATTA  
ATATTCTTTGAAGGTCTGACAGAACTCTGCATTAACCCATCTGTTCTGGGCTTTTTTTTTTTTTTTTTTTTTTTGATT  
GGGAGACTATTAATTTCTCCTTCTATTTCTTTAGGGTATATGGGACTGTATATATCGTTAACTTGATCCTGTTTAAAC  
TTTGTACCTGGTATCTGTCTAGAAATTTGTCCATTTTGTCCATGTTATCCTGTTCTGTTGTGTATAGCCTGTGGTAG  
AAGGATCTGATGGTGTGTTTTGGATTTCTGCAGGATCTGTTTTATGTCTCTCTTTTCAATTTCTGATTTTGTAAATTAGG  
ATGCTGTCTCTGTGCCTAAGGGATGCTAGCTAAGGGTTTATCTATCTTGTGATTTTCTCAAAGAACCAGCTCCTA

TTGGTTGATTCTTTAAGTAGTTCTTGTTTCCACTTGGTTAATTTCACTGAGTTTTATTATTTCTTACATCTTCTC  
CTCTTGAGTGAATTTGCTTCTTAATTCTGGAGATTTTTATGTGTTTTCAAGCTGCTTGTATGTGCTCTCTGGTTT  
CTTTTGAGGCACTCAAATCTGTGAGTTTCCCTTTAGTAATGATTTCAATTGAGTCTCATAAGTTAGGGCATGTTCTG  
GCTTTATTTTCATTAACCTAATATGTCTTTAATTTCTCTTTATTCCTCCTTGACCAAGGTATCACTGATAAGACT  
ATTGTTCAATTATCAACGTAAACATTGGCTTTCCATTATTTATGTTGTTATTGAAGATCAATCATCCTTAGTCTTTGGT  
GGTCTGATAGGATGTTTTGGACAATTGCAATATTTTTATCAGTTGAGGTCTGTTTTATGATCAATTATATGGTCAA  
TTTTGGAGAAGGTACCATGATGTGCTGAAAAAAGTTATATCCTTTTGTTTCAGGATAAAACGTTCTGTAGATATCT  
ATTAAGACAATTTGTTAATAACTTCTTTAGTTTCACTGTGTCCCTGTTTAGTTTCTGTTTCCAAGGTATGTCCATTG  
ATAAAAGTGTTTTTTAAGTCTCCCACTATTATTGTGTGAGCTGCAATGTGTGCTTTGAGCTTTCTTTAATGAATGG  
GACTGCCTTTTCATTTGGAGCATAGATATTCAGAATTGAGAGTTCCTCTTGGAAGATTTAACTTTGATGAGTATGT  
GTCCTTCTTTGTCTTTTTGATAACTTTAGGTTGGAAATCAATTTAATCGATATTTGAATGGTACTCCAGCTGATTT  
CTTCAGACCATTTGCTTGGAAAATTTTTCTAGCCTTTCACTCTGAGACAGTGTCTGTCTTTTTCCCTGAGATGGGT  
TTCCTGTAAGCAGCAGACTATTGGTCCTGTTTTATAGCCAGTCTATATCTTTTTATTGGGAACTGAATCCATTG  
ATATGAAGAGATATTAAGGAAATGTAATTGTTGCCTCGATTATTTTGTGTTAGAGTTTGCATTCTGTTCTTGTGG  
CTGTCTCTTTTTGGTTTGTGAGGGATTACTTTCTGCTTTTTCTAGGGCGTTGTTCTGCTTGTATTGTTTTTTTT  
TTTTTTCTGTTATTATTCTTTGAAAGGCTGGATTCATGGAAAGTTAATGTGTGAATTTGTTTTTATCGTGAAATAC  
TTTGGTTTCTCCATCTGTGGTAATTGAGAGTTGGCTGGGTTAATAGCCTGGGCTGGCATTGTGTTCTCTTAGTA  
TCTGTATAACATCTGTCCAGGATATTCTGTCTTCATAGTCTCTGGTAAAAGTCTGGTGAATTCTGATAGGCCTG  
CCTTATATGTTACCTGACCTTTTTCCCTACTACTTTAACAGTATATCTCTATTTAGTGCATTTCTTCTCTGATTAT  
TATGTGTCAGGAGGAATTTCTTTCTGGTCCAGTCTATATGGAATTCTGTAGGCTTTTTTATATTCATGGGCATGT  
GTTTCTTAGGTTTAAAAGTTTTCTCTATAATTTTTGAAGATATGTGCTGGCCTTAACTTGAAAATCTTCATTC  
TCATCTACTCCTATTACCAGTAGGTTGGACTTCACATTGTGTCTGGATTTCCTGGATATTTGAGATAACATCTTTT  
GCATTTTGTATTTATTTGATTGTTGTTCCAATATTCTCTATGGAATCTTCTGCATCTGTCAATCTCTCTCCATGTCTT  
GTATTCTGGTGTGATGCTCGCATCTATGGTCCAGATTTCTGCTAGGTATTCTATCTCCAGTGTGCTTACTTT  
GGGTTTTCTTTATTGTGTCTACTTCACTTTTTAGGTCTTGGATGGTTTTACTCAATCCATCACCTGTTGGTCTGT  
TTCTTCAATCTTTAAGTTTTTTTTTTTTTTGTGTGTGCTTCTTAAAGTTCTACCTATTAGCAGTGTCTCCTGT  
ATTTCTTTAAGTGAGTTTTAAAGTCCTTCTGATGTCCTCTACCTTCAACCTGAGATATGCTTTAAATATAGGACT  
ACTTTTCGGGTGTGTTTGCCTTCCAGGACTGGATGAGGTGGGAGTGTGTAATTTATGATGGTGTGAGTGGTCT  
TGGTTTCTGTTAGTAAGATTCTTATGTTTGCCTTTCATCATCTGGTAATCTCTGGAGTTAGTTGTTATAATTGTCTCT  
GGTTATATCTTGTCTCAGATGATTATGTAATCCTCTATCAGTAGACCTGGGAGACTAGTTTTCTCTGAGTTTCA  
GTGTTACAGAGTACTCTATGCAGGCAAGATCTCCACTGCAGAGAAGGGACCCAGATATCTGGTGTTCGAACCTCC  
TCCTGGCAGATGTTGTGATCCACTCACTAGAGGTAAGTCCCCTGGAGAGTCTGTGGGGACCTTTGGGGTGT  
CCACAGACTCTGCCACAAGGTGCCCGATGCTGTCATGGACTGGAAGGGACTTGTGACCCTGATCATACCGGTTTC  
TCTGCTTCCCTAATGAATGCAGTCAAGTCTGTCATGATAGGATTGGAGCGGAAGTTGTTTTCCACTCACCAAG  
GTCTTAAGATCTCATGGATGTTTCTGTGAGGACCTTGGGGCTGTCTCAGACTCTGCCAATATGTTGCCAGGTG  
CTGGCACAGATCAGAGGGACTTGGAGACCATTGTCAGGCCAGTTTTCTGCTTCCCTAATTAATGCAGTCTCAGATCC  
TGTGAGATTGGATTGGAGCAGAGGTTGTGTTACATTCAACAGAGGTCTTATGATCCTATTGAGGGTCTTGTGGGG  
ACCTTAGGGGTGTCTGCAGACTCCGAGCCCAATGTGCCCTTGTGCTGGCTTGTGAGTCTCTCTTATGGTACACT  
TCTCTGCCTCCTAAACAGATGTTGTAAGATAATGTTTTAGACTCTCTAGACCCAGTAACCTTTTCTAATTTTCAG  
AAGAGGACTGCCCTATAGAAGCCATGACACCTGTCACCTGCTGGCACACTGAAGTAGGGTCAAAGGTAGTGTAAC  
ACTTCTATACCTTTAAGAGGTACTCTAAAACACTGCTGGGGCTCCTTTTTCTTGTAGGATCTCTTACCTTGG  
TCAAATTGGTGGGGCACCTGCCAGCCCCTTTCAGTCTATTATCAGAGCCCAGCAGAAAATTGTCAATTGCTCCATA

TGGTCAGTCCTATCAGGACATGTCAGAGGGAAGGCTGCATCTATTTCAATCAGAAGTTTTATTAGTAGTCAATTGG  
CCCCAGTATGCTCTTTCTTCTCCTCTCAGAATCCTCTCCTTCTCCTCTGTGGTGAAAGAACCTGTAAAAGCTGCTGAC  
AGTCATCCCAATAGGCTGAAGAGAGAATATGAGAGATTCCTTTAGATTAGCAAGGCTAGAGGGGTTTTCAACGA  
AGGGGATTGTGATTTGCCTTCCAGTTATAGAGATCAGAGGAGGAAAAAGGCCATTACTGAAGGGGCTGCAGTTGT  
CTGGGGTCCGCTGGATGAGGGTCATAAGTACACAAAGGCAGTGCGATGGTTGAGTCTGGTCCCTCTGGGCTTTGA  
GCTCGCTGGTCTTGGGCTTTAGCAACTGGTCCCTCCCAAATATCTAGTGGCACCCCTGTTGAGAGTTCTTTGGGGG  
ACCAGTTGGGAATATGCGGGTGGGGTGCAGTGCCATTTTGGAGGTTCTTCTAACTCTGGATAGATCTTGGGAGAA  
ACCGATGGCTGCAGTTAAACGGTGCCAGATTTAACTTTTTATTTCCCTCTCTGGATGGCAGAGGGCCAGGACTG  
GGGAGCCTGGACTATTCTTTGAACCAAGGCTTTAAACACGATAGGAGAGGGGGGATCCTGTGCTAATTTTTCT  
AGATGAGAATGTAGGGCACTCAATCTGGCTGAGACCCTGGTCCCTCTGTAAAACAACCTTTAAGAGCTGAAAACA  
GAACCAACCAAGGGTGCCTCTAGTGGCCAACATCAAAGCTGGCCATTCCGTAGAGCACAAAGTTCTCTAA  
AATCTATTTTACAGACATCCACCGAGAAAATGTGAGTCTTAGTCTTAATTTTCACTACTGTGCACTAGGGTCACTCAAG  
GGGCATGCTAATAGTCGGTCCCATCATCAGAGTTACATACAGGGGAAAAACCAATATATACACACAAAAAGATTA  
CAATAACCAAGAACAGGCCCAATAAGATGGCGAGAGAGCACACACTCACTTGGCACCCAGTAACAGAAACAGAC  
AGCCGAGTGAGCACACTCTCACTTGGCACCCCTGATAGGAGATCTCCAGGTATCCCTGGAACCTCTCAGAACTGGG  
GAGTGACTTCTTTCTGAATTTTTATCTCCTTGTCTTGGCAAAGGAAGGCAGGCATCTCTGGTTGTAAAGTATAAAA  
AAAAATGCTTTATTGCTGGCTATAGAGAACAAAGTGCTTCTCCTAGCTGTATTTAAATAGATCAGGGAAAAACAAG  
CTTGGGGAATGTCTAGGGGCTTTACCTTACTGGGAGATATACTTTAAGTTAGAATCTCCAGTAGGATATTTTTTCT  
ACAACACACAAAACTTTACACAGAAAATTTTCAATTATTTATAATAAATATATAATATTTGGTTTGAACCAAATGT  
TAAATCCATATAAAATACATGGTAGTATCCAAAAAAGTGTAAATTTACTTTAAACAATTTATACATTTACACCCC  
ACAGCACTTCTTCATAACTGTACTACCCTTGTGAGATCCTTCTTCTCCCAAATGGTCCCTCTCTTATTTTTATAATG  
GTTCTCCTTTTCTTGTGTGTATATATGGAAACATCTCATGAAGGTGGTTGTATTGTACTCGTTGATATTTTTTTGTG  
ATCACAAGGTCTAAAGGACCACAATCTGGTCTTCAACTACACATATAAGAGCATCTGACCCTGAATTGCTCTTTTTC  
CTGAATCGACTTCTCCAGTCAAGGGATCACAAACACCCTTTTGAAGTACTCTATTGAAATGGGAAAAAATTGAAA  
ATATTGTACTGTATCTTCATCTGTTTCTACCTGAGGTGATATATTCTCATCTTTGTCAAATGCTGGGCTCTGTACTAT  
ATGGACAACAGAAAATGGAAACATAATATGCTATATTAGTAAAAGGGAATAAAGTTTTAATGATTTGAATTTCTCA  
GGAAATACTGCCATGTGAATTTTTTAAACAGCTTTGAGAAATGACGTAATTACATACATGATATTCAGTATAGGT  
ATAGATGAGAAGTAAGTTTTCCAAATTATAGGGCCATTGAATATCTTTACCAATATTATAGAAAAAAAACCTCCCT  
AACTTAAATAAAGATATGCTCATGAATATACAAGAAGCCTACAGAACGCCAAATTTTGAACCAGAAAAAAAAT  
CTTGCCATCATATAATAGTCAAAACACCAAATGCACAAAACAAAGAAAGAATATTAAGCAGTAAGGGAAAATG  
GTCAAGTAATATATAAAGCAAGATCTATCAGGATTACAAATAACTTTTCCCTTAGACTAAGAAAGCCAGAAAATCT  
AGGGCAGATGTCATACAGAATGTAAGAGAGCAGAAATGCCAGCCAAGACTACTATATGAAGCAAATTTCTTTTAA  
CATAGCTTGAGACAACAAGGTATTCTGTGACAAAACCATATTTACAAAATATCTTCCAATGCATCCAGCACTTCAAA  
CGATAATAAAGAGACAATTTCAATATAACGAGGGAAATTACTCAAGAAAAAGCAAGAAATTTAACTTGAAGGA  
AACCTAAAAGAAGATAGCTACATGAACAAAATTTCAACTCTAATAACAAAATAACAGGAAGCAACAAGAATTTTT  
CCTTAGTATCTCTTAATATCAGTGGACTCAGTTCACCAGTAAAAGGCATAGAATAACAAAATGGATGTGTAAGCA  
ATATTCAGCACACCAGAAACAAACACCAAGGACAAAGTCAGACATTACCTCAGACTAAAAGGCTGGAAAAGAACT  
TTCCAAGCAAATGATCCGAAGAAATAAGGTGGAGCAGCCATTCTAATATCAAATAAAATTTGACTTTCAACCCAAAG  
TTATAAAAAAAGTCAAGGAAGGAACTTCATATTCATTAAGTTAATATTTACCAAATGGACTCCCAAATCTAA  
ACATTTATACTCCAAATGCAATGACATCCACATTGATAAAAGAACTTTAGTAAACTCAAAACACACATTGTACCAC  
ACACAATAATATTGGAAGACTTCAACACCCCTCCTTCATTAATGGACAGATCCTGGAAACTAAAATAAAAAGATA  
CATGGTGAACCTCACAGAATTTATGAAACAAATACATTTAGTTCATATCTATAGAACATTTTATCTAAAACAAACG

AATGTCCCTTCTTCTCATCACCTCACAATGCCTTCTCCAAAATTGACCATACACTCAGTCACAAAACATGCCTCAACA  
GATATAAAATTATTGAAATAATGTCATGCTTCTAACAGATCACCACAGACTAAGGCTGATCTTCAACAATAATATG  
AATAATTGAAAACCCACATACACGTGGAATGTGTATAAAAATCTAGTCAGTGACAAAACAGTCAAGGAAGTAATC  
TAGAACTAAATTAAGACTTTTTAGAGTTTAATGAAAATGTAGCTACAACATACTGCAAGTTATGGGACACAATGA  
AAATAGCCCTAAGATGGACTCTCATAGCTCTCTGAATGCCTCTAAAAAAGAACTGGAGAGAGGATATAGGAG  
TAGGTTGATATCACACTTTAACTATAAAAACAAAAGGAAGCAAATTCACCCAAAAGGAGTTGAAATCAGGAAGT  
AATCAAATTCAGTGCTAAAATCAACCAAGTGGAAACAAAGGAACAATACAAAATAATCAAACAACTGGGAGCT  
TGTTCTTTGAGACAATCAACAAGATAGACAAACCATTAGACAGAATGAATACAGAACACAAGAACAGTATCCAATT  
TAGTAAAACCAGAAATCAAAGGGGAGAAATAACAACAGGAATTTAGTAAATTTGAAATATCATCAGATCCTACTAT  
ACAAGGCTGTAICTCAACAAAAGTAAAATTCTGGATAAAATTGACACTTATCTAGACAGATATCAGGTACCAAATT  
CAAATCAGGATCAGATAAACCCCTGTAATTACTTCTACCACTGTGAAAAGCCGCCCTCATGGTCGCCATTACAATATG  
GTGCTGACAACACCATTGTCATCATTGCTCATGGTGAGTGCGCGCGGGTGTGAGAATATCTTTCCATTACCTGAGC  
CCTGCCTCTCCCATGGCGTCATCAGGCTGATAGTGGGCAGCCAATCCCATGGTGACATCCCCAACCTTACTTCTAA  
CCATACTTCGCAGCCAATATAAGGGAGGAGTTTTCTGCTTCTAAGTCTCCTGTCCTGAAGCTGTTTCATCTATATCTC  
GAGATGTATTACAGCTTTACTACAGAAAGATCCGAGTGTCTAGATGCGTTCTTGCTGGCAAGATGGTAGCGTGG  
GTCATCTGGTGCCAGAAACCCAGGATCAACATTGCTGGCATTGAGGGGAACCCCTGAAGAAGGGATGGATTGAG  
AACTGCATGGAAAAGGTAAGTTCCGAGAAAGTATGTCTGATCATGAACCTCTTATCCCTTTTGATTTCCGGTCTTAATC  
TAGATGCAACTTAGGAAGGGGCAGTAGAAGCTCTGTTTTGGTTGCCCTGGCCCTCATTCTGTTTCTTATTCTGTCC  
ATCGAGGCTGGTGCTGAAATTTGAGGTAAATCGCGGCTGGTGCTGAAAATGAGGTGTTGTGAGTCCAATGTAGA  
TAAGTGGCAGCACTGAGGTATCTTCTAGCTTTCCATAGATAAGGGAGCAAAGTGCTGTGTTTACTTTCACTTTGCA  
AAAGGAATACTATAAGTGGGGTGTAGATCAGCCGAGGCACTCACTCTATCATGGGCTCCTCACAGTCAGTGATC  
ACCACATTACAGTCAGTGCTAAAGCAACGTGACCTGCAGGTTGCTCCCGTATGCTGCAGAACTTTGTTAAGGAGG  
TGGATCACATTTCTCCCTGGTATGCCTATTCGGGGTCTCTAACTGTAGCCTTATAGAATAAGCTAGGAAGGGACCTT  
GACCATAAGCATGAAGAGGAAGACTTATGCCTGGGCACCAAGGCAATTTGGAAGCTGATAAAAACTGAATAGA  
GGATGAAACCTGCCGACCAGCCAATGTGGAGGGACAGGGAATACTAGAAGAGGTTCAGGACAGTATGTCAGAAA  
CCTAACAGAAAAGAGAGAAAAGGGAGCTCGAAAAAAGAAAGACACATCACGAAAAAGGGCCCTCCCCAGGATTGAG  
AAAGAAGGGATGGAGAAAAGAGGGCAGTAAAAGTATCCCTCTACTAAGAAAAAGCCTCACATGTAATCAACAT  
TACCTTGAAGCTTGGAGTGCTTGGGGACAACCCAAATTTCTTAGAACAGATAATGGACTGGCCTACACCTCTCAA  
AATTTCAACAGTTCTGTCTCCAGATGAATGTATCTTATTTAACTGGTTTGCATACAGGGACAAGGCATTGTGGAAC  
ATGCCACCACACTCTTATAACCTACCTTATCAAATAAAAGGGTGAGTCGATGAGGGCCTGCCCTTAACTGAG  
AGTGGCCATCTCCATGATACTCTTACTCTAATTTTTGAATATTGATGAACAAGGCCACACTGCGGCTGATCATC  
ACTGTTCAGAACCAAACAGATCTAGAGAAATGATCAAATGGAAAGATATCTTAACCGGAAAATGGAGAGGCCCG  
GATCCTATTTAATAAGATCCAGGGTAGTTATTTGTGTCTTTCCACAGGAAGAAGACAATCCTCTTTGCGTTCCGGG  
ATGCCTCATCTAAAGGATCTCCCTTCAGAAGATGTGGACAAAAGAGGGAATACTGAAACAAAGAAGGCTACTGA  
CCCTTACTGGAGATCCTGGTTCTAGTATATAGGGGAAATTTGTGTTGGGGTATTATGTCCACCTTCTCTGCCC  
ATGCCTGTGATGCACAGTGCACAAGTGTTCACATTTCTTACTACTGATAGGGAGCTTCAACTTGCCTTTTTACCA  
TTAGATGGGCAAATTCAGGCTCTGATGGAAAACAGAACTTTCCCTCAAAGTTGCATATGTAGCAGAGGATGGA  
CTAGTAAGTCATCAATAGCAGGAGAGACACTTGTCTTGTAAAGTTCTATGACCAAGTTTTGGGAATGCCTGGGC  
CAGGAATTTGGGAGTGGGTGTGTAGGAGAGCAGGGCAGAGGGGAGAGGACTGGGATTTTTGGAGGGGAAAAT  
AGTAAAGGGAATAACATTTGAAATGTAAAAAAGAAAAAAGAAAAATAAATAAAAAAAGAATGAAAT  
AAATTATTCATAGTATTCTTGAATAAATCAAGTTTTACAAACATATCATTGGAACAATGTTTCAAGGATTTTTCCGTT  
GGCAAAAATAACAAGTATTTTTATCAACATATTGTGACTACAGTGCCAAGAATAGTTATATATTAGTTGCTAA



AACTCTGGTATAGGAATATATAGGTATAGGTAAAATTTCAAATGAATTATACAAAATCTCTTAGAAAAGACTTCTTC  
CAATTCAGCTGACTAGGTAAAAGTCTAGTGAAGTGCAGGACACGCAATTAATACCCAACCCTGAATATGCAATAAC  
CTTCAGAAAAGAGACTCCTCCGAAATATTTATGTCATCTTCTTCATCATCAAAGTCCAAAAGTAATAAGTAATCTCCTT  
TGGAATCACCATCATTTTCTAACAGCCATTCTTCTTAAAAACTGTAATGTCTTCTTAGTTAAAAAAAATGGAAAA  
CAAGGAAAAAATCTTAGTAATCTGAATCCAAAGGTATCATTTAAGTAGTTAAAAATATCAAAAATGAAATAATTA  
TATGCACTTCTCTTTCCAGTTCCTCCATGTGTCCCATTTATTATGTCCCTCTCCCTCACAACTTGTTTTAAAATCTTC  
TTAACTTACTTCTATAAAAAACTCCTTTAGAACCAGAGTTAACAATATGTCAGATCCCAGTTTAAATAAGAGGAAA  
AAGGCCAGCCTTGAATATGTGAGACTTCTTAACTACCCAAAGACGATGAGGAAAATGTATTTGCATTTAATTTCTG  
AGTCATCTGATTCTTGTTCCTATTTCCACAGATTCTTTTTAAACAAAACATTAGCAATTTTGTATCAGTGTGTCTC  
TGTCTTTAAATAAACTCACACTGCTATCAAGATAGATAATGAATATGGTAACTGTATATTCATTTGAGAAGACCCAA  
AGCTCCCTCTACAATAAACACCCAACAGCACCAGCACCACACAGAAAGACCTTCTATTGGAGAAAGCAGGGATTT  
GGGAAGACTTGGTTTTCAAATATGTGGATATTGTAAGTCCAAGGCCAGCCCAAACCAAGACAGCCTGAACTACA  
AAGGAAGAACCCTACAGAAGGAAAACGGAGAGAAAAGGCTGATCTCCGTGGTGCAAGTCTTTAATAGAAA  
TACTTGGGGAATGAGAGGGGAGGATCTGTGGTCAGAATCCATCTTAGAAGACTTATGAATCTTCTGCATTGTCTGC  
TCTTATTCTTTTCATTTATTCTTCTATGCCACTCCCCTTTCTGTAGTATCCATACAGTCTCTACCAAAGAAATACACA  
CTAGAGAAGACAGTGAGGGTAGAGGAATGCTCAGTGTGTCTCTAATAGATTTTGGACTACACACAGGACAAGTGC  
CAATTTCAACCCTAAGGTCTCTTTCAGCACATAGGACAATCGCCAAGACTCCTCACCAATGGCACCCCTGATCCCCTG  
ACCCCCAGTCTGCAGCCGGCTCTCTGATCCTCTCCCTAGGCCCAAGCTTGTGTCTCCAAGGGTTTTCAATCCTCT  
AAGCCCCTGTCTGTTCAATCCTGTGCAATGAATATGATCCTCCTCCTTATTTTACCCTCAGAAGCCATAGGATATG  
CCGATCGGGAGGCTTTTCTCACAGAGTGGCCTCCTGAGACTGAGATTTCCACCAGTCACACATCTGTTAATAGT  
CCAATTACCCTGATCAGAGCTGGTTATCAGTAGCAGGTCAATCAAAGTGAACACCTTACAACCTGAACCCGCTCCT  
GCTTGGCTGCTCAATGAAAAAAAAAAAAAAAAACAAAAAAAAACAAAAACAACAACAACAACAACAACAACA  
AGCAAAACAAAACAAAACAAAACAAAACAAAACAAAACAAAACAAAACAAAACAAAACAAAACAAAACAAAAC  
AAAACAAAACAAAACAAAACAAAACAAAACAAAACAAAACAAAACAAAACAAAACAAAACAAAACAAAACAAA  
AAAGAAAAGAAAACAAAACAAAACAAAACAAAACAAAACAAAACAAAACAAAACAAAACAAAACAAAACAAA  
CCCAGATGGAGTAATCTGAGGAGCCTTTGTGATGCCAGATGGAGAAAACAGGTCTCATCCAGGGATTTCACTGTT  
TGGCTGAATATACCCTGTGTATGCTGTGCATGGAGTACCAGGCACCATTGATTGGAAGGGAGTTCTCAGGAGGTGG  
AAAAGAGCTACCATCTTTAAGACAAAATGATTTGCAATTTCTAGGTTGAAAAGCATTGTCAGACTTGAAAAACATGT  
ACAAATGTGTAACATATGAAAGCACTGGAAATGGCACTACTAATTTCACTGTAATATTTTTTGTATTATTTATGT  
GCATAAAAATTTAAATGTGTGCACTTTTTCTGTATGTACATTCCACAACAGAAGAGTCCATGCTGTCCTAATAGAT  
CAGAAGAGAACATCCAGATTAACAATCCCTGGTAAACTCCACCTCCACCTCCTAGTACTGAGCTTGTTTACA  
ATAGTGTGCTAGGATGTGCAGGCCCTCTCTCCCTCAATTATGTGCTAGGCTGCCAGCCCCTTTTTCTCCCTTATGT  
GCTAGAGTGCTCATGCCTATTCTCTCACTTATGCCTCTATGGCCTACAGAGGCTGAAAGAGAGCAGTGATTCTCTA  
AACTTTGGCTGTGCATAAATTGTAAGCCACTATGTGGGAGCATTGTGCCCGGTCTCTCATAGAAAAGGTGCTT  
TTTGTGTTGTTGTTGTTGTTGTTGTTGTTGTTGTTGTTGTTGTTGTTGTTGTTGTTGTTGTTGTTGTTGTTGTT  
CTGGAACCTACTCTGTATACCAAGCTGGTCTCGGACTCCCAAATTTCTGGCCTCTGCCACCCAAGTGATGGGATTA  
AGGCATAAACCACCACTGCCAAACAGCAGTTGCTCTTATCAGCTAATTTTTCCATTTTTCAACTAATCTAGTGTGTA  
CTTCATGTATCTTACTGCATTTCTCCATTTACTTTCAAGGTGGAGGGTGTTCACCCGGAACAGGGATCCAAAGT  
GGGATCCGTGCCACCATGGCATGGGTGTTCTTTGTTACATCCCAACATTGAGAAATCCAACAAGAATCATTGGAAC  
AGACTTCAAATGAATCACTTGAAAGAATATAAACAAGAAAGGGGGGTAACACAGACTGGGGGAGATGTATAAT  
TAATCTGGTTTACCAAAGTTTTATTGAACCCAGTGATCTCTACTGATATTAGTATGTCCATAAGAGTCTGGGAG  
GCATCATATATCCCAATGCTGAGCAAATCTTGAGATGCCAGTAAAAGAAGCCTTTACAACCTTCTCCCTGGAT



TGAGTAGGAGAAAGTCTGGTACTATCTAAGAGCAATTATCCAGTGACACTTGAAAACTGGCAGTTCTCATTGTA  
GTTTTGACTATCAGAAAATGACCTAATAGCCCTTTTAGTTGGGGAGAATTTTATTGAGTATTTTTGCATTGATATA  
CATAAGAGAAGTTGGTCTGAAGTTGCCTTAATCTGGAATCAATTCACCTAAAAACAATAGACTAACAGACTGA  
CTATATAAACAATACACAATATTTTGCTGCATAAAAGAAACCCACCTCAGGGACAAAACCAGATACTACCTCATAG  
TAAAAGGCTGGAAAAAAATTTCCAAGCAAATGGTCTGAAGAAATAAGCTGGAGTAGCCATTCTAATATAGAATA  
AAATCAATTTCCAACCCAAAGTTATCAAAAAAGACAAGAAGGGAGAGTTAAGGCTCATGAAAGGTAAACTCTTCC  
AAGATGAACCCTCAATTCTGAATATCTATGCTCAAATGCACAGGCATCCACATTCATTAAGAAAACCTTTAGTAAAA  
CTCAAATCACTCATTGCACTGCACACCATAATAGTGGGAGACTTCAACAACCCGCTCTTATCAATAGAAAGATCCTG  
GAAATAGAAAATAACAGAGACACATTGAAGATAACAGAATTTATGAAACAATGGATTTGATAGATATCTACAG  
AACATTTTACCCTAAAACAAAAGGTTATAACTTCTCTTAGCACCTCATGGTCCCTTCTCCACAATAGACCACAATCA  
GTCATAAAACAGGACTCAACAAAAATATTGAAAGTATCCCATACACCCTATCACATCACCATGGACGAAGGCTGAT  
CTTCAATAACAAAATAAATAAGAGAAAGCCAACATTCACGTGAAAGCTGAACAACCCCTCTACTCAATGATAACTTG  
GTCAAGGAAGAAATAAAGAAGAAATTAACACTTTTTAGAGTTTAAATGAAAATGAAGGGACAATATACCCAACT  
TATGGGACACAATGAATGTAGTCCCACAAAGAAAACCAAAGCTCTGAGTGCGACCAAAAAGAAACCAGAGAGA  
GCACACACTAAGAGCTTGACAGCACACCTAAAAGCTCTAGAGCAAAAAGGAGGCAAATTTACAAGGGTGAGTAGA  
TAGCAGAAAATCATCAAACCTCAGGGCTTGAATCAAACAAGTGGGCACAAAAAGAACTATTCAAAGTATCAAACAA  
TCCAGGAGCCTGTTCTTTGAAAATAGTATCAAGATAGATAAACCCCTTAGAATGATGAACTGGAGTGCACAGGGAT  
AGTATGCTAATTAACAAAATCATAATGAAAAGGGAGACATAAGACCAGAACCTGAGGAAATCCTAGGCATCATC  
ACATCCTACTACAAAAGGCTATACTAAAACAAAACCTGGAAAACCTGGACAAAATGGACAATTTTCTAGACAGAAATC  
AAGTACCAAAGTTAAATACAGATCAGAATAAAGATCTAACAGCCCCATATCCCCTAAAGAATTAGAAGCAGTCAC  
TAATACTCTCCCAACCAATAATGGCCAGGAACCCACATGGGTTTGTAGTGTAGAGTTCTATCAGACCTTCAAAAA  
AGAACTAATTCAACTGTTCTCAGACTATTTACAAAATAGAAACAGAACGTACTCTATTCAATTCATTCTATAGAA  
GCCACAATTACTCTGATAACTAAACCATATAAAGTCCCAACAAAATAGAGGACTTCAGACCAATTTCCCTTCTGAAT  
ACCGATGCAAAAAATATTCAATAAAGTCCATGCAAACCTGAATCCAAGAACATATCACAAAGATCATCAATAATGAT  
CAAGTAGGCTTCATCCAGGGATGCAGGGATGCTTAAATATAAGGAAACACATCAACATAATCCACTATATATAAG  
CAAACCTCAAAAACAAAACCCACATGATCATCTCCTTAGATGCTGAGAAATCATTTAAGGAAATCCAACACCCATT  
GATAAAAGTCATGGTAAGACCAGGAATTCAAGGCCATACTTAAACATAATAAAAGCAGTATATAGCAAAACAGT  
AGTCAACATCAAACCTAAATGGAGAGAACTAAAACCAATCCCACTAAAATCAGGGACTAGACAAGGCTGCCACT  
TTCTTCTATCTATTCAATATAGCACTTGAAATCCTAGCCAGAGCAATTGGACGACAGAAGTAGATCAAGGGACAC  
CATGGTCCCTGGCCCGGGGATTCTTCGGACACCCGCAAGGACCCATACAGGATACTCCATGGGATCCTAAGCCC  
TCTGGTGAGTGGAACACAGCGCCTGGTCCAATCCAATCGCGCAGGACCCTAGACTGCACATTATTATTATGCATAT  
CAGATAGGCATGTGTGTGTGTGTGTGTGTGTGTGTGTGTGTGTGTGTGTGTGTGTGTGTGTGTGTGTGTGTGTGT  
ACTTGTGACCAGAGGAATGCAATCATGCAGTATCTTTCTTTATGTCTCTCTGCCATTTTCTATGATGCAGTGTGTTT  
ATTAGAATATCTTTTGGCCATGGGATGTGGCACTATTGCAAGGTGATGGCTTGTTTGAGGAAGTGATCATTGTGT  
AGGCTTGCTTTTATGTAGTGACAATGTCTGCCAGTGACGAAAATCGATCCTCTTCTTCTGCTACCTGTGGCCACAA  
GCTTCTCCTGGTTGCCGTCAAGTATAGACCAATTAGTTTCTTCTCCTCAGTACCTCCTCTACCTGGATGCTGC  
CATGCTTCTACCAATATAATAATGTACTGACTCTATAAGAGTTTCTGAGTCATGATATCTTTCACATCAATGAAA  
CCCTATTGAACATGGGCAGTATGTTAGCCTGAATTTAATGCTTACAAGATAATTGCAACCAGCATGGAAGCACAA  
AGTAAAGATGATGAATGAGTCTCTGTATTTTTGAACCTTCTGAATTTTTGAATGAATGTGGGGATTGGGAAAATTA  
GAAAGTTATGGGAAGGAGAAAGAGAGGATGCAAAGACCTTTTGGGCTCCTGCCACTTGCTTTTGCATTCAATATTT  
CTATTTTAAAACAACCAACAACCTAAAACAACCAATGACAAGGCATCCATACAACAGATTCACAGAGAAGACACC  
AAAGGGCATTACATTCTGTAAATCATTTTCCAGCTAATGTCTGGGTATTGAGCCTAAAGATTTTACTGTCAAACCC

TGATGATTAATCACTAGATTGGATCCCCTAACACAATGATGAATGACACTGTGGTCAAAGGACAGTTAACATGTA  
TAAATACATCGTTTTTCACACTGTCAGTTTGAATTGTTACTATATATCCCAGTTTTTTTTTTTTTTTTTGCATTTTATC  
TCCATTACTGTGTTGTTTTAGCCCTCACTTGCTACATAGAAAATGGATTCTTTTACACTATATTTTATTTAGGGTGC  
ACAATGGAACCTAAAGACTAATTCAGTCCATTCAAGTAGATCTCTCTGTTCTCTTTACAAAATTGCAATTAATAG  
TTTTCAAAAATATTTTGCCTTGTGTGGCTTAGTTAATTAAGATTGGGGGGGTTATATCTCCACATTCTCAGTT  
GTCTCAAACCTGGGAAAACCTGTCTAGAAAATGTTGTGGAATCTTTGTGACTGTGCCCTAGCAGAAGTAGATCACTGG  
GACAAGATGGAGGGAGCTGGGTGGTCTGAACTAAATCTTGGCTTCAAATCCAACCAATGTGAGAAGGGCCCA  
TTCAGGCTCTCAATGCCACAGATCAACTTGTGTTTCTCCAATGCTGTCCTTATCATGACAGTCTGTCCCGGTAAC  
TGTTTGCCATATACATCTCTTTTTTTTTTTTTTTTTTTTTTCAATTTTATTATAAATTTAGCTCATTTACATTTCCAATG  
CTATACAAAAGTCCCCATAGCCACCCACCCCAATCCCTTATACCCCACTCCCCCTTTTTGGCACTGGCGTTTTCC  
CTGACTGGGGCATATAAAGTTTGCATGTCCAATGAGCCTCTCTTTCCAGTGATGGCCGACTAGGCCATCTTTTAT  
ACATATGCAGATAGAGTCAAGAGCTCCGGGAACTGTTGAGTTCATAATGTTGTTCCACCTATAGGGTTGCAGATC  
CCTTAGCTCCTGGGTCTTTCTCTAGCTCCTACATTGGGAGCCAGTGATCCATCCATTAGCTGACTGTGGGCAT  
CCTCTCAGTGTGGTGTAGGCCCGGCATAGTCTCACAAGTACAGGTACATCTGGGTCTTTCAATAAAATCTTGC  
TAGTGTACGCAATGGTGTCAAAGTTGGATGCTGATTATGGGGTGGATCCCTGGATATGGCAGTCTCTACATGGTC  
CATCCTTTATCTCAGCTCTAAACTTTGTTTCTGTAACCTCTCCAAGGGAGTTTTGTTCCCACTTCTAAGGAGGGGC  
ATAGTGTCCACACTTCAGTCTCATTTTTCTGAGCTTCATGTGTTTAGAAAATTGTATCTTATATCTTAGGTATCCTA  
GGTTTTGGGTTAATATCCACTTATCAGTGAGTACATATTGTGTGAGTACTTTGTGAATGTGTTACCTCACTCAGGA  
TGATGCATTCCAGGTCCATCCATTTGGCTAGGAATTTCATAAATTCATTCTTTTTAATAGCTGAGTAGTACTCCATTG  
TGATAGTGTACCATATTTCTGTATCCATTTCTCTGTTGAGGGGCATCTGGGTCTTTCCAGCCCTGGCTATTATAAA  
TAAGGATGCTATGAACATAGTGGAGCATGTGTCCTTACCAGTTGGGGTATCTTCTGGATATATGCCAGGAGA  
TGTATTGCTGGATCCTCCGGTATTACTATGTACAATTTCTGATGAACTGCCAGACTGATTTCCAGAGTGGTTGTAT  
AAGCCTGCCATCCCACCAACAATGGAGGAGTGTCTCTTTCTCCACATCCATGCCAGCATCTGCTGTCACCTGAAT  
TTTTGATCTTAGCCATTCTGACTGGTGTGAGGTGGAATCTCAGGGTGTGTTTGAATTTGCAATTTCTGATGATTAAG  
GATGTTGGACATTTTTTTTTCAGGTGCTTCTGTCAATTCGGTATTCTCAGGTGAGAATTCTTTGTTGAGTTCTGAG  
CCACATTTTTGTATGGGGTTATTTGATTTTCTGAAGTTCACCTGAGTCTTTATATATGTTGCATATTAGTACCT  
ATCTGATTTAGGATAGGTAAAGATCCTTTCCAATCTGTTGGTGGTCTTTTTGTTTTATTGATGGTGTCTTTGCCTT  
GCAGAACTTTGGAGTTTCATTAGGTCCATTTGTCAATTCGATCTTACAGCACAAGCCATTTCTGTTCTGTTGAG  
GAATTTCCCTGTGCCATATCTCAAGGCTTTTCCCCCTTTCTCCTCTATAAATTTAGTGCCTCTGGTTTTATGT  
GAAGTTCCTTGATCCACTTAGATTTGACCATATTACAAGGAGATAAGCATGGATCGATTACATTCTTCTACATGAT  
TACAAGTAGTTGTGCCAGCACCAATTGTTGAAAATGCTGTCTTTCTCCACTGCAAGGTTTTAGCTCCCTGTGCAAT  
ATCAAGTGACCATAGGTGTGTGGGTTCAATTTCTGGGTCTCAATTCGTTCCATTGGTCTACGTGTCTGTCTCTATAC  
CAGTACCATGCAGTTTTTATCACAATTGCTCTGTAGTAAAGCTTAGGTTAGGCATGGTGATTCCACCAGATGTTCTG  
TTATCCTTGAGAAGAGTTTTTACAATCCTAGGATTTTTGTTATTCCAGATGAATTTGCAAATTACTCCTTCTAATCC  
ATTGAAGAATTGAGTTGGAATTTGATGGGGATTGCATTGAATCTGTAGATTGCTTTTGGCAAGATAGCCATTTTT  
ACAATGTTGATCCTGCCAATCCATGAGCATGGGAGATCTTTCCATCTTCTGAGATCTTCTTTTATTTCTTTCTCAGA  
GACTTGAAGTTTTTATCATAACAGATCATTCACTTTCTTAGTTAGAGTACGCCGAGATATTTTATATTATTGTGACT  
ATAGAGAAGGGTGTGTTTCCCTAACTCTTTCTCAGCCTATTTATCTTTGTGTAGAGAAAGGCCATTGACTGGAT  
TGAGTTAATTTTATATCCAGCTACTTCACCGAAGCTGTTTATCAGGTTTAGGTGTTCTCTGGTGGAAATTTTTAGTGC  
ACTTATATACTATAATATCATCTGGAAAAGTGATATTTTGACTTCTTTTTCCAATTTGATCCCCTGATCTCC  
TTTTGTTGTGCAATTTGTTCTGCTAATACTTCCAGTACTATGTTGAAAAGGTAGGGAGAAAGTGGGCAGCCTTGTCT  
TAGTCCCTGATTTTAGTGGGATTGCTTCCAGCTTCTCTCCATTTACTTTGATGTTGGCTACTGGTTTGTGTAGATTG

CTTTTATCATGTTTATGTATGGGCCTGAATTCCTGATCTTTCCAAGACTTTTATCATGAATGGGTGTTGGATATTGC  
CAAATGCTTTTTCTGCATCTAATGAGATGATCATGTGGTTTTGTCTTTGAGTTTGTATATAATGGATTACATTGA  
TGGATTTTCGTATATTAACCATCCGTGCATCCCTGGAATAAAACCTACTTGGTCAGGATGGATGAGTGCTTTAATG  
TGTTCTTGATTGCGTTAGCGAGAATTTTATTGAGGATTTTGCATCGATATTCATAAGAGAAAATTGGTCTGAAGTT  
CTCTATCTTTGTTGGATCTTTCTGTGGTTTAGGTATCAGAGTAATAGTGGCTTCATAAAATGAGTTGGGTAGAGTAA  
CTTCTACTTCTATTTTGTGAAATAGTTTGTGCAGAACTGGAATTAGATCTTCTTTGAAGGTCTGATAGAACTCTGCA  
CTAAACCCATCTGGTCCTGGGCTTTTTTTGGCTGGGAGACTATTAATAACTGCTTCTATTTCTTTAGGGGATATGGG  
ACTGTTTAGATGGTCAACATGATCCTGATTCAACTTTGGTACCTGGTATCTGTCCAGAAAATTTGTCCATTTCTGCCA  
GGTTTACCAGTTTTTTGAGTATAGCCTTTTGTAGAAGGATCTGATGGTGTTTTGGATTTCTCAGGATCTGTTGTTA  
TGTCTCCCTTTTCATTTCTGATTTTGTAAATTAGGATTTTGTTCCTGTGCCCTCTAGTGAGTCTAGAAAAGGTTTATCT  
ATCTTGTTGATTTTCTCAAAGAACCAACTCCTCGTTGGTTAATTCTTTGAATAGTCTTCTTGATTCCACTGGTTGA  
TTTACCCCTGAGTTTGAATTATTTCTGCCATCTACTCCTTGGGTGAATTTGCTTCTTTTTTTCTAGAGCTTTTAG  
ATGTGTTGTCAACCTGCTCGTATGTGCTCTCTCCCGTTTCTTGGAGGCACTCAGAGCTATGTGTTCCCTCTTAG  
AAATGCTTTCATTTTGTCCATAGTTTGGGTACGTTGTGGCTTCATTTTCATTAACCTCTAACAGTCTTTAATTTCT  
TTCTTTATTCCTTCTTGACCAAGATATCATTGAGAAGAATGTTGTTTCCAGTTTCCACGTGAATGGTGGCTTTCTATAA  
TTTATTTTGTATTGAAGATCAGCCTTAGTCCTTGGTAGTCTGATAGGATGCATGGGACAATTTCAATATTTTGTAT  
GTGTTGAGGCTGTTTTGTGACTAATTATGTGGTCAAATTTGGAGAAGATACCATGAGGTGCTGAGAAGAAGGTA  
TATCCTTTGTTTTAGGATAAAATGTTCTGTAGATATCTGTCAGGTCTACTGTTCCATAACTTCTGTTAGTTTCACTG  
TGCCCTGTTTAGTTTCTGTTTCCACGATCTGTCCATTGATGAAAGTGGTGTGTTGAAGTCTCCCACTATTATTGTGT  
GAGGTGCAATGTGTGCTTTGAGCTTTACTAAAGTGTCTTAATGAATGTGGCTGCCCTTGAATTTGGAGCGTAGAT  
ATTCAGAATTGAGAGTTCCTCTTGGAGGATTTTACCTTTGATGAGTATGAAGTCTCCCTCCTTGTCTTTTTTGATAA  
GTTTGGGTTGGAAGTCGATTTTATCTGATATTAGAATGGCTACTCCAGCTTGTTCCTCAGACTATTTGCTTGGAAA  
ATTGTTTTCCAAGCAAATTTGATTTTATAGGGTGTAGTTTATTTGAATAGTGGCTCTGAGTCAATAAGACAAAAAGA  
CCACCAACAGATTGGGAAAGGATCTTACCTATCCCAAATCGGACAGGGGACTAATATCCAATATATATAAAGAAC  
TCAAGAAGGTAGACTCCATAAAATCAAATAACCCCATTAATAATAGGCCTCAGAAGTGAACAAAAGATTTCTCCCC  
CGAGGAATACCGAATGGCAAAGAAGCACCTGAAAAATGTTCAACATCTTTAATCATCAGGGAAATGCAAATCAA  
AAGTCTTATTTTCATATTTTATTATTTACAGAACATTGTGTGTTATAAATAGAAATCTAGAGGAGGAAAGATGTTT  
AGAGTCACTGACACAAACACTTAACTGAGGTTTTCTTGCACAGGAAGAAGATATACCCATCCTCTATATCTGGAG  
AGTTTCTTAGGACCCTAATGATATAAAAGTCTTCAAGTATCTAGGCTAAAACAACATTGCTTTTGCCTATATTTATG  
CAAAGTAACCTCTTTTATACAGTAATCATATTGATGTGTGTATGCATACCGAAATATACAGGTAAGTGCAGAGGAT  
TGGGAAGGGTATACTGTTTTCTGTTACTTCACTCCCTAATTTCCCTCGTGATAGGGTTTCTTGTGAACTAGGAG  
TGAGGCTGACATACAGTCATCCTTCTGTCTCTTCCACTCCCATCCTAAGCACCAGTGTGTCAGGTGAAAAGTTTGAC  
CAAACACTTGGCTTTAACCCTGGGCCATCTCCCCAGATTCTTCTTTATTTTAAATAACCTATGGATTACTTTTGTCTC  
AATGTAATGAAACTGCTGTATAAGAAGTTGTTATTTAGAAGATGGCAATATAAGTGGTCTGTATGTGTTTCACTACA  
CACATGGTATATTAAGAACTACTTTCTTAATACCTGAGAATTGCATACAAATATTTTGTATGTAATTTACTTTCCAA  
TCCTTTTAGTAACTCCTCCAGAACAAAATACGGCCATTACCACCTAACTCCTCCTGCCAACTTCATATCTTATCTTC  
TCTTTTTGTTACAACCCATTCAAATCATTGTGTTTCCATAAACTCTTGGACATCTGGCTTCCACTAGAGCATGG  
CCAATTTATCACCTTCAAAGGCAATACCTTTGATGAAAAGTACTGTTTATCCCTCATCAACTGTCTATACCTTATTA  
GATAGTGATGAGGGATAGTGAGCCCTCCCATCAGTGATGGAAGACAGAATGGCCTGATTTTGTGCAGAAAAGAA  
ACAGTTTTATAATTTTTAAGGTCTTTTTAGAGTTCTTGTGTTTTCTATTTATAGAATTTTATGGTTTTAAAAATATTT  
ATTAAGAATTAAAAAAATAGCTTTTTGGGTCATTTAGTGTTTGTTTAATAATTTTTTGGTTTTTGGGTTTTAGGTT  
TTGCTTATTGTTTTAGTTTTTTTTTTTATTAAGGTAAAGTGAATGTTACTTTCTATTAGTTTTATTCTTAGAGGTGG

AAGCATGTGTTTGTGGATTTGTTGTAAGATTACTTTCTTGTTTCTTCTATGGTGTAGTTTCACTCCTTGTGTTGTTGTT  
TTTACCTATTATTCTTTGTAGGGGTGGATTTAAGGAAAGATTATGTGTA AAAATTGGCTTTGTCGTGGAATATATTG  
TTTTCTCCGTCTATGGTGATTGAGAGTTTTGTTAGGTATAGGAGCCTAGGCTAGCATTTCATGTTCTCTAGAGGTGG  
AATAGATGCTGGTATTAATATCTTTTTATGAAAATACATCCATGAGTTGAGAGAGAAGGACTTCCACTGGCCTTTGT  
ACCCTAGTGCCATGTTCTAGGTGCTGCTAGTGAATGGGGA ACTAAGTGACACCCAGTGACAACAGAAAACACCT  
CTTTCAGAATCATACTAAGAATGTCAGGCAGAGTTTATTTTGGCTGACTCATGGTAACCAGATCTTATATAGAGA  
GGGTGGGACTCATGTATCACTTCAGAAAATGCTTTAAGCTTAGTCTTATATATTTTACAGAGAAGGAAAAGAGAG  
AAATAACTTCATGAAGGATAACACCCAAGAAAGCAAATGATCAAGGCAGCTTTACAGCAACACACAAATCTGCC  
AACACTAGTGTTTACTAGTGGTTTGTGGTGTAAATAGCCAAGGAGGCTACTGGACCATAGAGGGGCTGGAGAA  
AGTCAGATTGCTTTTTGTTATTGTTTTATTTTATTTTAAACATTTCCCTTTGAATTCAGCCAGTCTCATTTTAGATTTT  
CCTGCTGCTAAGACCACTAGTGTCTCTGGTACATTCAACCTTACTGATCTCCAGGCGACTAGACTTGTGAGGGTCA  
GAGTGGA AACTGGATATTTTACAACCAATTATCTGGGCCACTTGCCTACCGCTGGTCACCTCAGTTTCTCTACCTAA  
ATTCCTTACTGATAATTTCCCTCAGCATGCAGCCTGCCATGATTCACAGACAGGTACAACA ACTGCTTCTGCCTCAGT  
ATTA AATTCAAGTCCTTCTCTTCTTCAGGAATGTTAATATTTGACGATATACAAATGTATTTATCTGAGAAAAG AATG  
GGCTATGCTAACCCATCGAAAAAGACACTCTACAGTGTGTAATGCTGGTCATCTACAAGCTAACCCACTGTCTAG  
GTTAACTGATTA ACTATAACTCATTTCCCTTGTGTATACATTGTGTAACCTGGACTGTAATGGTGAAAAATACACCC  
TGGGAGATATTACCTTTTGGGTTATAATTGATTTAGATTGCTTCTCACTGTTGAAGCAGGAACTGCTACAGAAAA  
AAAATTCTATGTTATTTTTTTTTTGGTTATTTGTTTTCTTTGTTTTTAAAGATACAATTTCTCTGCATAACCCTGGCTG  
TCTTCAAGATCAATCTGTACAGCAGGTTTACCACAACTCACCTGCCTTTGTCTCCAAGTTCTGGGTTTAAACAT  
GCACCACCATCATCCAGCTCAGTGTGAAAGTTCTTAATTTTAGTGAGGATCAATTATTTCTTTAGAATGAATATTTT  
TTCCATGAAATCTAGA ACTCTTAACTCTATTAATCATACTATACTCCAATTTTCTAAATCTTTTATTTTGTCTTACA  
TTAAGTCCATGCCCTTGTGAATTTTACATACAGTATGAAGTTGAGATTGAGTGTGAGGCTTACTCTTTTACCTAT  
TATGTGCTACTGCTCTCGGGTGAAACAAAACATACAGCACAAATTACATATATGCATAATGTTATAAAACTATGGT  
GTATATATTATATAAATTTATTTATATGTAATATATTTTATCATTTATAATTTTGTATATAATACTTTAAATG  
TAGTTTAAATAGACTTTAAAGTGAATTACAGGGTGTGATCCAACAATAGCTGTCTACCAACTGATATTCTAAGAAC  
ATAATAGTTATTAGTCAATGAGGTGGATTGTCTCAGGTAGTCTCCAGTGTATTATGGAATACTGAAAATGGCCTG  
TATTGACAGTGAAGGAATGGGCTTCCAATGAGGGCAAACAGGCAAAGAAAACAACTTTCTTCTTCCACGTCTTT  
CATATAGGTTGCAGAACATTTATATAAGTGTGTGCCAGGTTAAGGTGACTTTTCCCACTTGAAAGATTGAGATTCA  
AAATGGAGCTTGCCATTTCAAAGTATTAAGAAAAAAAATCCTTTAACGTCTTGCTCAGTCAGTTGGATTTTAAATTA  
TTCTTGATGCAGTAAAGTTCAAACCAAGA AACTCATCACATTGTCCAATTGGCTCCCATAATTTATTGACATTTA  
TAGCCTTCTTCAATTGAATTGCTTGTGATTTTTGTTGAAAGTTACTTTGCAATTTGTATACATATGTACAGACTGAGC  
TGTTTGACTTTTTGTTGTTATTATTTAACTCTTAAACAATTATAGATAAGCCCTCATATCTATTACACAATTTTTTTCT  
ACTTTATTCATTCTTGTATTCTTTGCATTGTGAAGAAAGAGATGGCTCAATTCTTGAACAGTACATGTTAACTTCC  
CGTTCTGGTTATAGCACCAAATATAGTTTAAACAAAAAACTGTCTAATGCCAGGCAGTGAGGGAACAGGTCTTCAA  
TCTCAGCATTTGGGGGTTGGGGGCATAGGCAGGCGAATTTCTGAGTTTGAGGCCACCATGATCTACAGAGTGAGT  
TTTGGGAAAGCCAGGGGTAAACAAAACAACTTTGTCTAGAAAACAAAACAAAACAAAAAAGATCAAAAAA  
CAAGAATAAAAACTTACTTGTATCTCTAGGTCTTCCGGTCTCTTTAGACCCTGAATACATATCACACACACACAC  
ACACACACACACACACACACACACACACACACATGCACCCTCACACGCAGAAAAACACCGTTTCAGATTTTAA  
AATACATTATCTGACTACTAAGAAATAAACTACATCAGTGTCTCTGGTGCCAGAAACCTTTAATCATAATACAAA  
TTTAGTTGAACATCAATGATTTTATACAGGAGAGAATCCTGTTTAACTGTATTGAATGTGGGAGGCCATTCTTCAG  
AAATGTCACCTCATTAAGCACCAGCTGACCCACATTGCTGACCATCCCTAAACATGTAACCTGTGTGAGAAAATGTT  
TAACAGACAATCAAGGCTTCTAAGACACCAGAACGTGTCAGAAAACAAGAATAAAAACTTACTTGTATCTCTAGGT



CTCTCAGTTAGTAATACACAACACAAATTCAATTCCACTTAACCCTTCTGAAAATGAACTTGCATGGTATTGTCTGAT  
TTGAAGCTAATAAATCTATTTAACTAAACCAGAGACATTTGTGTTAGGAAGGAACTACTACTGTCTGTTGTTTAGA  
AAATGGAAAAGTTACTTCTACAGTAAAAGAAAGAAAGGAGGGCCTGCCTTCAGCAATTGTGGGAAGTCTGTGTTG  
CATGTGCATTTTTTTCAGTTCAGCAGCATCTAGGGCACTCAGAATACACAGAGATTTCTTCATATGTGGCGAGAAAA  
CCAAATCTACAGGAATCCCAGGCAAGTGCTTCAAGCGAAGTCTTAGTCGAGCGAAAGTAGATGTAAAACCTCCCTT  
CTGCATGGGAGGTTTGTAGGAAACAAACAAGCTCCAAATCCTATAAATGTAGTCTCTCTGAAACTTCCAGTAGAAG  
GTCTATTTGTTTTATATGATTTTATACATTTTAAATGTACTTACATTATGGGTACATGTGTTTGATTAAGTACATATGT  
GTGTAAGTGTGCACAAACCTGCACATGTGTAGAGATTGCAGGACATTGTGGAAGAGACAATCCTTTTCTTCTAC  
CATGTATATTATTTTCAGAGATGAAGTTCAGGTACGCGGTCTTGAGTGGCTAGTAACCTTACTTGAGTGGCTAGTGG  
GCCACCTCATACTTCTTGAGCTTTAATCTTTACATCCTCTGAAGATTGCCTGTTCAATCATATGTCAAAACCCA  
CAGAGACTATGAAGTTGGTCATGCTGCAAACCAGCATGAGTATAGAAAATGAAGCAACCAAGTATAAATGAGCCA  
TTGATATTTCTTATCATCTATCACTCCCATAGGTCGAAGTGGTTAAAACCTCACCCAAAGCCTTCTACTATCAGTT  
GCATTGAACTAAAAGTGTCTGTAGCAGTATCTGTATGCACAGCGCCTGCAAGGTCTGAGATAGAAAGAGCCCAAG  
CAATGAGAGGGAAGGGCGTGCATGCCACTATCTTTATCTCAGAAGTTATTTCTAGTTTGTAGCTTGGAAAGGAAAA  
CATTCAAATTTCCACTAGGGTATCACTGGGTATGCAAACCATGCTTAAATCTAAGTCTCTAGTTCAGCATTGCCTGG  
CAAATGAAAATCAAACCTGGATAATAATCTTGGAGGTCCTTTATATAATAAGGTATTGGCAGGGTCTTTAAAGAAT  
ACCTAAGGGTCATTTGTTTATATATTATGGTTTGCAGTTTTTTTTGTTTTATGGGATTTCTGAGTGTGTTGTAAC  
ATATATGTCTCTGTGTCTACATGTATATTTCTGTGCTTTTTCTTGCCTCTTTTTATTATGTTTGTGTTGTTCTGTTCT  
GGTTCATTTGTTTATTTGTATCTTAATCTTCATTATTATTGTTATTAGTATCATTAAATAGTATCATTATTATTTAGATG  
CCTGTTTGTATTTAATAAAGGGAGAAAAGAAAAGTGTGAATTTGGGTGGGTCGAGAAGTGGAGAGGTTGTAGA  
AGGATTTGGGGGGACAGTAATCTGAATCTATTGAATGAAAACTGTATTTTCAATGAAAAGTGTCTTCCAGAAAT  
TTTGATCTTACTATTAGTACAAAGGAATCAAAAACCTATTTTTTAAAGAATCATATTGTATACAGAGGAAAAAATG  
AGAGCTTTTCCAACCTGAGAAATATTTCATTTTGCAAGTATGGTAAGGACCCTAGAGTTAATAATCAAGAACACAGA  
GCACAACACAAAGCAGAAAAAAGTACAAAGCACACAAATATACAGGCAGGAATCAAATTAGTCAATTTATTGA  
CCTTTTTAATGGAGCACAAATCCTCATCCATTCTCCATTCGGACAAAACAGATTTGCTGTTGTCTCCAATGACTTTGA  
GTAGGAATTCATCCAGTAACCTTTCTCATCTATTTTATTAGAGCTGACTCATCCCTGCTAAGATTCCAGGACAGGAA  
AAATAGACTCCATCATCCTCTTGGGAATGTGTGTTTCCAAGTTCCTTCATATATATTCTTCTTATGCTTGGTGAACC  
CCTACATTAATTTATTTTTTCTACTTCTATACTATAATTTCTACTGTTATAAATCCTAACATACATACCTGACATAA  
AGATAGTCTTAGACAACCTCCAGATGATCACATGATTAGACAATAAATAGATCACATCTATCCTAGTACAGTTCTG  
GAAGGCAGAAAGTGTAAAAATCAAGGAGCTGGCTAGTCTTACTAGTATTTCTGACTGTGAATGGCAACCTAT  
AAGTTCTAAGTCTTGTGACACTTTTCATGGGAGTTGTCTAGGACTATCTTTATGTCAGGTATTTATGTTAGGATTTA  
TAACAGTAGGAAATTATAGTTATGAAGTAGGAAAAAATAATTCTATGTAAGGGCTACCAAGCATGAGGAAGAA  
TATATATGAAGGAACTGTAGCATTAGAAAGGTTGAGAACCCTCTCTGGATGCTTGAAAACAGAAAGCATAATGG  
AGTCCTAGGCTGGTCTTGGCATCAGTCTGATATCTGCTTCAACTAATATCTTGTTCCTTTGTTTCTTGTCCACAT  
GAGGGGAATAACCTAGATAGTATAGTCAAAGGACAAATCTGAGGACATGTTTCAAGTCCCTTTTGTGAAAACATG  
TGCTGTTGATCATTTGGAAAGGGCTGTCTTTGGAACCAGTGCATGCACATGAGTGTCTTGGTGTCTTGTCTTTCT  
TTCTTTCTTTCTTTCTTTCTTTCTTTCTTTCTTTCTTTCTTTCTTTCTTTCTTTCTTTCTTTCTTTCTTTCTTTCTTACT  
ATCTTTCTTTCTTATTTTATTTTATTTTTTTTTGAGGCAGGTTTTCTCTGTGTAGGCCTGGCTGTTGTAGAACTCATTC  
TGAAAACCTGGCTGGCCTTGAACCTATAAATTTGCCTGCCTCTTCTACCAAGTCCAGGGAATAAAGGCTTGAAC  
ACCACACCCAGCTTCTTTGATTTTTTTTTATTCTGCTATTAACCTATTGTTCCCAATGTTGTTTATTTTATTTTATTTT  
ATTAGATATTTTCTATATTGACATTTTAAATGTTATCCCATTTCAAGTTTTCCCTCTAAAAACCAATAACATGTCCC  
TCCTCCTACTGACCAACCTAAGCACTCCTGCTCCCTGTCTGCCATTCCCTTCACTGAGGTATAGAGTCTCTC



AGGACCAGGATCCCCTCCTCTCACTGTGTCCATCTAGTCCATCATTTGCTACATATTCGGTGGCAGCGATTGGCCCC  
TCACTTTGCATTATTTGGTTGGTCTTTTTTTTTAATTACATATATTTAACTTACATTTCAAATGTTGTATTCTTTCCCA  
GTTTCCCACTCATCCAGAAACCCCCTATCACATCCTCTGTCCCCCTGCTTCAATGAGGGTGTTCCTTACCTGTGCAC  
CCTACTCCACCTCACAGTGTGGTGGCTAACAAAGTTTATATCTCTGTATCCTTATCATTCAACACCATATTGGGGATCC  
TGCAGCTTATAGGGAAAAGATGTCCAGATTCTGAGAACTGCAGGGTACCATCCAATACATCAATCTCAAGCCACAT  
GTGGGTACATCTTCTAAAAACGTGTCGTCCTGTTAATAGCTTTCAGTTGGATCTTTAAGTACCTCAGCCAAGATT  
GAGGTGACTGCTCCCTGCATAATCACTGCCACTTCATTTTGGGGAGCATCTGTGCCAGGAAGTCAGGGTAGATAT  
CCACATAGTTGATGCGGATTTAGTGGCCTGCAGGCACAGATGGAAGTCATGCATGTCCAAGCCTTACACATTTGA  
GCTTAGGAGATAGTATGTGAGCAGTTTTATGTTGTCATTTTGGATTTCTGCATAGGACATATTGTCTTTCATTAATTT  
TGGGATTTATTTACATTTTAAATGATAGCTCCTTTCCATTTTCCATTCAACAAATCCCCAACCCATCCACCATCTCCT  
CCCTTCCCTTGGAAAAAGGCTTAGTTTGTATTATATTTCTATATTGCACTCCATCACTGAGTGAAATCAAGACAGG  
ACACATGTAGGAGTATAGGCAGGGTACATGGAGAAAGGCTGCTTATTGGATTGCTTCTCAGCACAGTTTTCTCAG  
CTTTTTTCTTACAAAATTTGAAAGCTTTTTTTTTAACTTTATTTAATAACATACCCACAAACACACACACACACAC  
ACACACACACACACACACACAAGACATAAGATCACTAATGAACAAGCGTAATGATTGTAAGCAATGTCCTAAA  
TGTATTTCAATTATCTCCAGTGCCACATTTATAAGTCAATTCTAGAGGCCTTATGTCTAATCATATTTGGCAAATGGAT  
ATAACCCATTATGCAGAATTTGGAAAATAAATATGAACATGTTTGTATCGATACTTGTTCAGGATTTCTTTTTGCT  
TTTTTCTGCTTCTCTCATAAAGGAAAGTTTCTAAAAACGTAATTGATCATTGCCACAAGCATTTAATGCAATAG  
GATTGCCTAAACATATCAAAACAGATAAATGGGCTATCCTATTCTAGTAAAAATTTATTTTATTCTGTAAGGAATTT  
GGAATCAAACATAAAAATTTGAATTCCTTATAAGCCCATGGAAACGGAATAGTTCAATGTGCTCATCAGACCTTAAA  
GAATTGGCCTTTTATGACAAAACAGTGGCAGTTATATCCCCAAGGTCACCAAAGGCGCATCTTGCTTTACTTTAT  
TTGATCTAAATTTTTTGCAAACTGATATTAAGGTCAGTCTGCAGCAGATCACCCTGGCATCCAGTTACTTCTAAT  
TCTTATGCATTGATAAAATGAAAGGACACACTAACTAAGGAATGTAAGGGTCCAGATCCGATTCAAATCTGGGGA  
AGGAGCTCGTTTTGCGTTTTTTCATGTGAAGATGGAGCACAGAGGCTGCCAAGAGATTAATTTGTTAGCTGAAC  
ACAGATCCTGAATCTTCTTATAAGTATCACTCTGAGAACTAAAATTCCTCTTTTGCATAGAATTTAGTTGGGGACTC  
AGCCTCCCAGAAAAGCTGTTTTCTGCTACTCTCAGAGCTTTGCAATTTGCAACTGAATAAAGTATCTGGACTTCCC  
CAAAAGAAGCTTTGCATTGCTACTTTCTCATTGTCTGGGTATCTTTTTCTTAAGCAGGTCAATCAACATCCTCCAATC  
AGACTGCAGGGGGAGTGCATCCCTGCAAAACAAGGCTTAAGGTGGCAACTGCTATTTTCACTTAAAGACATTCTA  
CCATGCATTTTGGCTTTAGGTCTGATTTGAAAAATAGGTTTATTAGAAGGGCTAGGAAGGCAGATATTTCAAATAT  
TAGAAGAGATTGGTTTTTATTCTGATAGATGGTCTTAGTCCCTTTGCTGGTCTCTGGTTCTCCATCCTTGCTGTTATT  
GCAAGCTCCCCTAATTTCTCAGGCTGTGGGAATAACAGAGATGAGGAGGATGACCTCCAGCTCCTAATATAGCCT  
AAAAGCCACAAATTGTGATGTTACCAAGTGGTATAATTCTGTTGAGGCCTTGCTAAATCTGCTGTTGGCAATACTCC  
TTTAGGAGATGCACAGTACTGAGAACTGTGCATACTGATTCTGATGATATGAATACAGTATGGGTACAGCTTCG  
GTGCAGATATTTACTGTATAATATCATGGGTATTCCGTGTTCTTTGTCTAATATCCATGTAGCAGTGAGTGCATACC  
ATGTGTGTTCTTGCTTAGGGAGAGATGTTCCAAATGTATCTGTTAAATCCATTTGGTCCATGACTTCTATAAGTTTC  
ACAGTGTCTCTGAGTTGAATGGTAGGGATATAAAGTAGGGAAAGAATTTGTTCAACCCATATTACATGAAAAAAA  
TTAAATTAATATACTTTTTTTTTAATCCAAAAGCATGCCTATAGACCCATCTAATGTAGGGAGATCCTATTTGATG  
TTTTCTCTCGTAGGTGACTCTAGATTTTACAAGTTGGCATAAGATTACTAGCACACTCAGATTAACATAAACGCA  
TTTTCAGTCATGTCTAAAACCATCATACCAATCGACCGAGATATTCTCTGTACATTCATGGGCTAAATGTCAGAAA  
CATGTGTGTTTTACAGTGTGTCTCAGCTTTAAAGTGAAATCCTAAAAGGAGGGCCATGGTCAACCTTCTACTTCC  
TGCTTCTAGGCCACTATTTGCTGCTCTGTGGCACTACAAAGGCTTCTTCGTTAATCAGGTACCACTGTGCCATAGAT  
ATCTTGAAGTGACAGAGTGTACAAGCATCCATGGGACCTAGATGCTGATGAGAACAATCTTACACCATCTCTTGCC  
TTCACAACATACTTATTAAGATGGTGAATATTGGGAAAGTCATGGTAGAACAATTTCTTTAAAGCCAGTGTCTGT

TCTCAACAGTCATCTCCTGATTTTCTATATGGACCTCATATGTTACACTTTGAAGTCAACCCACAATCTCATGTTTCTT  
GTGCAAGTCATTAGAGTGTCAATTAAGCTAGACTTTGGGAATATATCAATAAGCCTGCATTATCTTCATATCCCT  
GCCCTTAATTATGGTAACCTTGCCAAGAATAGATGTCTCACCATTCTACTGACAGTTTACCTGGTAAATAGATAGT  
TGAGAAAAAGACATTCTTCTAAGGCCAAATAGCCTAGTTAATCAGTATATGAGAAGCAGGGCTGACATCACTCA  
GCACAAAAGCTAAAGAGAGTCTCTTGTGTTTGTGGAGAAGTGTGAGAGAAGCAGGGACAGGGCCTTAATGATATT  
CAGTCCAGACCTAGAGGCTGGGTCTAACAGCATCAAAGGAATACAGGCCAATTTCTCCAGCTTCTGGAGGAG  
CACTGTTTCTCTTCAAATGTGACAGGGATGGCACCCACAAGGGGGAAGAATGCAGTGTGTTCTAGACTTATTTG  
AGCCATCAGGGTAATAATCTCCACATTTCCCTTGCTATTACAAATGATCAACCTCAATAGGGGTCATGTAAGCTC  
TGCTGACACCAGAATCTCTAATTGCAAAACCTTACAGGAAAGACCAGTTTTCTCCACTCTAAGGATAAAAAGCA  
AGGATTGGGCTCATATGGCTAAGCATTTCTGACTAGCTTTGAGAGAATAGCGTGGTCCAAGGCCAGATTTCAGA  
TTTGGTGATTACTGACAGTTTAAAAATAAGTACCTGTAACGTTTGTCTGTGGTACTGAAAAATATTGCCCAAAT  
GTATGAACACAAAACGGTGAGCATGTAGCCTAAGGAGCAACATTTCCCTGATTTAACACCAGGCACTTGGCATTCA  
TTCTATACACAGAAATACCCCCGAGTCTCCAGACCACCTCCTCAACTGTACATTACAAGCATTACAAGTTTTTGT  
ATAGCCATAAGATAACAAGTCTTCAAGAAAACACAATCAGACACAAGGCAGAAACAAGAAGTCAATGATTGATCA  
AATTGCATTATCAATAAAAAAATGTCAGCAATGGGTTGACATTGCTTAGTGTCTGCATAAAATTGGTATAAATGGA  
CCTAAAAGTTCTGTAACAGTTCATGAGTACAAGAAAAACAAGATTATAATTTCTTAGTAATAAAGAGAGAAACACT  
TTCTGTTAAAGTATTCAAACCTGTCTAAGGTAGATTTGTCACTCAATGGTAGTATTTGATTTGTAACCTCAAAG  
CTGACCCGTCCAGCAGGTCCAGTTATTCGAGGGTCTCGACAGGACTTTCTCCTAAGAAATAAATGGGGTGTAGAG  
AGAGATGAGGATATTGTGCGAACAAAGATATGGAAATGTTCTGAATTACATCAGGACCCCAATGTATTAGCCATG  
ACCAAGGTTTAAATGCACAAGCAAAGGGGAAGTGCCTTTCAGCAGGAGAAATGGGGCAGAAGCAATGCACCTC  
AGCAGGAGGGATGGGGCAGCAGGGTGGGGGGGAGAGGAAGTACTTCTCAGCAGGAAGGAAGGGGCAGCGG  
AAATTTTTCTTTGGCGACTACTGGTGAAGCAGGAAGTGGCGTTATCAGGGTACATCTTTAGGTCAGGACATCC  
AGCACTTACTTAGGGTTGGAACAATCTGTAGTTGTTCTCAGAGCAGTGTGCTGTGGCCTGCTTTTGACCCTTTTT  
CTTATGGGGGCGGGGAGGTGGAGAGACCCAATTCAGAGATCAGGACAATAGCATTGCAGTAATAGTCCCAAC  
AAAAAGCATAGATGCAATCCCCACCACCAGAAAATTAACAAAAACAACAATACAAAACAAAACAAAAACAAA  
CAAACAAAACAACAAGCAAAAAAAGCAAAAGATACTCCAATGCACTGTATCTGCTTTGTTGTGAGTAAATCCACAA  
ACATGAATGGATAGCAACACAGGAAGGAATTATGCACAGCAAGGCACACACACACACACACACACACACACAC  
ACACACACACACACACACACACACACAAAAGTAAAAGAAACAGTCCAGTCAAGAAGCTATTGAAGAGAGTCCTT  
TAAAATTTATGATAAAGAAGATGAAGTGTATTTCTTACAGTTGATAATTTCTGGTGGAGGGCAAGGAAGATTCAT  
TTTTAGAGCTTGTGTTTGATATTTCTAGGTTCTTTTTTATACTCCAAAACACTAGATAGGACAGAAATAAAGGTA  
GAGAGAGGAATTAGAAAATCTCTGAATCTAATTTTTCTAGTGCTTTTTCTTAACTATGGATATGAAAAACCA  
CAAGCAACTTGCTTAACCAACCACCAACACCAGACAAAATGTACTAGCTTTGACACTCAATCTTGTGCAAAGTAAT  
GCAGCAGGAGTTTTCACTAATGTATGTTGTATGTAATATAGTATTCACCAAACCTTAGTAACTCTGTATTCCATA  
CTTCTGCATTGAGCTGTTCACTATTTAATATTAGTCATACCTATTCCATGCTGTGCCATGTGTTTTGATGCAACTA  
AGTTTCATCTGGGGACCTCATATGAAATGCAAATATTGTGTGTAATCTCCCTTAGTGTTACTTCATAACATGTTTC  
ATCTATGGAGTAACAGTATTAATGCTTTCTGTTTGAAGTACACTTTCAGTGTGCATAAGTAGATACTCCACTTTAGT  
ATTTTATGATACTAAATATAACATATAGTGTATACTTAGAAGATGAATCCAGTAAAGGATTTTTAAAATGTTGTG  
TGAGGGCTTTGTGATTTAAAAAAAAGTGTCTCAATAGTATTGGCTGAGATTCTGCAGTCTTGTGTGTGCTTTTT  
CTAATGAATCATAATTAACGTTTATGCTGAGACTCGGGGAGGCAGGCTTATCAGTAGAAAGAAAGCCATTATCTTG  
GAATCTCTCTTTTATAAGTACTCCTATAAGTATATAAATGTCTGGGTGGCCAATTAGACAGAAACCATGTCTTGGT  
ATACTTGTGCAATCTGATAGCTTTGTGTAACCAATCACCCACCTCTCAGGACTTGAATTAATGTAACCTCCTAAA  
ATGTCCAATAATTACAAAGACACGCACCAGGTACATGCACAGCACAAATTCTGACTCATTCTGATTCTGAATCTT

CCTATGACTGTCCTTGTGACTCTGCCTATCCTTCTTTTTCTGCCTCTACATTCTCTACCTCAGCCTGTATCTGAACCTC  
TGCCTCTGCACCTTCTATGCCTTTGATTGTCCCACTGCTACTTATTAGTGCTGAGATAACATACAGGTTAGTTTAGT  
TTTAGAATTGATCTACTGTGGAATTGGTTTTCTATGAACATTAAGTTGCCTCTCTACCTTGTACTAAAACCATTTGAT  
TGAATTTGAATCTTCAGTATAATGAGAGATGTAACCCAAATTCATAGGGCAACAATGTCTAGGTAACCTGTCTGGCA  
TTGAACAGTCACTCCACTGTTCTGAACAACTGATTGTAACCAGTAGTTTAAGCACAGGCAGATAGCATAAAGTGTA  
AGTATGCAAGCCTGTCTTGATTTCAATGTGATAAAGATCGGGGCCAAAACCTACAAAAGGAGGTAATGGTTTTCTTT  
CTGTTTACAAGTCTCAGCTTGTAATTCATGATCTAGGAAAGTCAGGACAGAACCTTGATTCAGAGTGGTAAGTAG  
AGGCAGAACTGAAGCAGAGACTATGGAAGAATCTGGATTACTTTCTCCAAGTCATAGGTATGCGAGGTCCTA  
GAGGATGCAAAACAGAAAAGAAAAGAAAAATAAGTACCAAACATATCACAAATGGTTGACCTACATGCATACTTTA  
AAGTCTGCTCTTGATAATATTTTTGTTCAATTTGGAAATCAAGTTCTACATGACAATTGGTAAACAGCATACTTTTCAT  
TATTTCTATTGGATGGACATTTTTACCTGAAGGAGTGATTTGTTGGATGTGAACATTCCTGGATTACATGGAGGTC  
CTAAGTTAGCTTGTATCAGGTCCCCTGGAACAGGACTTACATGTGGCTGTGACACACAGGATGATCACTGGGAATT  
GAATCCCAGACCCTCTGCAAGAGCAGCCAATGATCTTATACTCTGAGTCATGTAAAGTTCTCCACATTTCTGGAGA  
GAGAAGGAAGGTGTAGGAAGAGAACATTACTCAAATGTCCAATTTTCATCTAAGAATAAATTAATGCTTGCAAGG  
GTCTGTCAAGATACACAACAAAACAAGAAAAAATTAGAAATTTGTGTAATAAATTTAAAGAATGTTTGTCTGCT  
CTGTTGTGTGTTCTGACCAGGACTAAATGAACACACTAAATGAAGCTGCACTGAGAAGCATAAAGAAGGGAGGTA  
CCACACTCTGACATGACTAAGGTTGTTTCAAGTGTATTTGTGTAATCCTTCAGGGGCTTCTTGCAAAAATAAACC  
CCCTTTATCAAATCTCCAACAGTAAATCTGTGTGTCTCAATTGGAGACTGGGCAGAAGATATGTGAAATGCACCA  
GGAAAGATTAACCTTTATTTTTCTTGCTATGAAACCATTTTCAGGGATCCTATGAAATCCAATGTCAGCTCCAGA  
CTGCATAGTATCAGGTTTTCTTGCCAATTCAAATTAGAGCCAATATCTAAAAGATGACTTATCTGTTACACAA  
AGTTGCTGCTACCAAATAGGAGGTGGCTATGATTCCCAACACCAACACTGTGGATCTCTCTCTCTCTCTCTCTCT  
TCTCTCTCTCTCTCTCTCTCTCTCTCTCTCTCTCTCTCTCTCTCTCTCTCTCTCTCTCTCTCTCTCTCTCTCT  
TGTCTGTTTCTGTGAGTCTGAATGTGATTGAGTGTGTGTTATTATAATGTAGCCATTCTTAAAATAAGAAAGGC  
ACTTTCATTTGTGTTTTTTTTCTTTCCATTTGGCCAAAATCTATTGATTAGCACTGGCTGGCCTCAAATTGGCTA  
TGTATGTATGGCTTTCTTAGAAGTCAAAGAGATATGATTCATAAGACCCATAGTCCTCTGGTAAAAGCAGGAA  
TCACTGTGATAGGCTTCCATTTTGAATATTATAAGGTTTGAACATATGAAGGTATGTAAGTAGTCTTCAAATAA  
ATTCCTAGGTGCCAGGGAATGGGGGCAAACACACATTTAATCCCAGGACTTATTATGCTGAGGCAGGAAAATCTC  
TAAATTCCTGTGCTCAGTCTCGTCTATAGAGCAAATTCAGTTCAGCCAAAGATATTCCATGGAATGCAGCCTGGAAA  
AAAAAACTTGAAATGAATAAACTTCATAGTTAAGTAATGAATAATTAACAAAAAACGCTGCGAAAGACGAGTGA  
AATATGCAATTATCTAGACATATACCAAATCCATAAGATAAACCATCTAACAGCACCTTAACACCTTAAGAAATAG  
AACCAATCATGATAATCTCCACCAAAAACAACCTGGGACTAGATGGCTGTAGTGAGAAATTCTATCAGACCATCA  
AAGAAGAACTAATACCAATTCTCATGAAAGTGTCCACAAATTAGAAACAGAAGTAACACTACCCAATTCGTTCTA  
TGAAGCCACAGTTACTGCATATTCTCCTGTGGAGATGGAATGGTCACTGCCTAATGAGGAACTGGTCACTTCTT  
CCTTTCATACAGGACTTTGTTGAGATTATTTTTGCTTCTACCATGGTTAATATTACAAATAGATTTTAAATACAGTT  
TTAACATATATGAATTTAGCTTTAGAAAATATCATGTATATTTAACAGGCTTTTAAACAATCATAACTTATATTCACA  
ACATAAAAGCAAAGAAGTTACAACCTATTTAATTAATGAGAGAAAATTAGAGACTATTCTAACCAAATTGAACCA  
GGAGGAAAATAAGAACTGTACTGAAAACTGATTTTTAGTAATAAAAATAACAAAATAATGATAATGATAATAAT  
AATAATAATAATAATGAAATACATTAGAAATTAACAAAAAATGAATACATATATTTGCTAGTTTAAAGTAAAAATA  
CTAATGAATAATAAGAAATATGTTCACTGATTTGAAATCCAATCTTCTCATTCTATGAAAATTTGGTTAGAATT  
TGAAAGATTAGCTTTGTGAATAGTTGCCAGGAAATTGACAGATGCCCTTAGGTTATGTTGCTTTCAGTTGTTATGG  
AGACAATGCCTCAATTACTCCTTTCTGTGGCTTGCAATTCTAGGTCCTCAGTCTGCCACTGCCTCCACCTCCACCT  
CCATTTCCGCCTCTGCTCTACCTCTGCCTCCTCCTTCTCCCTTCTCTGTCCATATCCCTGTCCCTGTCTAGTCCC

TCTCCCTGTCCCTGTCTCTCCCTGTCCCTGTCCCTGTCCCTGTCCCTCTCCCTCTCCCTCTCCATCTCCCTCTCCCTCT  
AGCCTCCCCACTAGCACACAGATAACCCTCAGATTATTTTCAGTTTTAGTACTGATCTACTCTAGAATTTTTTTCCTTC  
ATGTCTACTTCCTCCTAGCTTGTTAAAACCTATTTAATTCAATTTGAATCTTCCACATAATAAGAAATTTATTCAAAA  
TTCATAGGCCAACTATTGCTAAGTAAGTGTCTGGTGTTTCATCAACCACTCCACTCTTCTAAAGGAAGTGTGTTGTAA  
TCAGAATTTTAAGCACAGGCAGATATCTTTAGTGTTAGTGTAATAATTCTGTCTTGTGTTCAATGTGATAAAGATCAG  
GACCAAACTGTTGGAAACCAGGCCTTACCTAAGTACTGTGTTTACCTGGGAGGCAAACAGAGGCTGAAAAG  
AGAGGGGAAGTATATAGGTGAGAGAAAATGGAGCCAAGACAATTTTCTGATCTAGGCTCAAATATTTAATAAAA  
GTTTTCACTTATAAAGTGTGAAACCCATTCTCTGCCATGCCAAGTTTCTGCTTTCCTGATACCAAGTTGTCAGCACA  
GCCTTTTAGCACTAAGTCACCAAATTCACAGATTGCAGTAACTACAGAAAATCTTGAGAACCAATTTGGCCTCAT  
GGCAGATGGCAGGTAGTTTACATCAAAGGAACTAGCTGAGGAGCTGCACTGCAGGTGGCCCTGCCTCAATGG  
CATAAGGTCTGAACCTGCATAGGTTGGAGGAGGTTATACTCCCCCAGTTAATAATATTTTAAAAAGTGCTAACT  
GAGGCATAAAATGTATTTATGCTCTATAGTCTTGCTGGGAGTTATGGTGACTGGAGGCCACACCTCCCTTAGGAA  
ATCTTAGATTTTCTGAAGCATCAAATCCATTATGGATGCTACGTGCAACTAGTTTGTGTTATATATCACACAAAA  
CATGGCTCTGTGTTGTGTTATCAACAGTCATTGATTTTGGCATGTACCTCTGTCTTAGATTGGTATGGTTCTGAGAT  
CTGGATGTCTGTCATTGAATGTCCAGCCCTCATTATCACACCTTATCCCAATTCAGACCAAAGTCATAATATGTACT  
AGAATGAAGATCAATAACTGCCACCTTCACTGTTGGAGGCAAGGCTGTACATCTGCTACAGTAAGGCAGAAGGAC  
TTGGATGACCTGCTTGAGAAACAAAGGTGGGACAGTGATAAGCAACAGTATGAAAGTTTCTTTGGAGAAGTCCAG  
GTACCCATTAGTTACAAATTAGCAATGATCAAGCTTAGTCTTAGAGATTCTGGTGTGGAGAGGTGGCTTTGAGA  
ATTGCAGAAAGGCTGCAGCCTCTCTGGGAGTGGAGGCTGTCTCCAAATTAATTTGCTAGCTAATTAAGATTTTA  
GCTATCTTCCCTAATTCTTCTAATACTGGAATTATTAATAGACCAGTCGAATATTGAATTAGGATACCTGTTACAGT  
GAAGTTAGAAGATGAATCACTATAACTCTATCTTGAGACTAATCTTTCTAAATCAGATTACACAGTCTCTACTGTTCT  
ATATCCATAATTCTTAAAAACCTGAAGTAAAGCATCTTAGCTTGCCAAACAGGGAAAATGATAAACAAAGGTA  
GGTCAAAAACATATACCCAATTCAGCTTTCTTGTCACTACAGTCAGGGCACTAAGCAAACACACTTGTTAGTTTGT  
ACAAAATTAGCCTTCATATATATGCAGCATTCTGTGAAGAGAACCTATTCTTGTCCCTTTCCCTATAAAGTAGCTA  
CTTAGGATCAAGCCATATACCAATAAGTAGATTTTTTTCATTTGACCTAGACATGATTATGTCTCCTATTTAAGATAT  
TATCAGGCATTTTTAAGTTCTTTGACATCCAAATTTCAAAGTTCTTAAAGTGTGATTTAATAATGTGCATGGGGAT  
ATAATTTATCTTGCCTTTGTTTTTTAAAAAGAAGAGTTTTTTAAAGTTCCACATTACCCTGTATTAGATAAATTAAT  
AAATTGTTTACAAAACATTTCAAATGCTTTACTGTTATAGTCAGTATTAATAACAAGGCCAGCGACTAATTACAC  
TTTCAATTGTTTATCTTGAAGAGCGGATTTAACTATAAAGCTTTAAATGTATTAATAGTCCCCCTCTCTTTCTCTT  
TCTCACTTCTCCATTTCCAGCAGCACTCTTCTTGCCTCTGCAGGTATTTTACACATGAAGTATCCAAGCAAAATGAC  
ATGTACACAAAACAACCATACCCACCATCAAAGTTTATAAAAATAAAGAAATGATGTGTAGACTATGATTCTAATTTT  
TCTGGGAAAGGTAGTATAGGAGAGAGGAATCACTGTGTGTGGTCTCACAAAGACACAAAGAACCCCCCAAATAG  
ATCCAATTTACCACTCCTTAGAAACACAAACACCACAGGCAGGAGGAGGATTTTGAATGAGGAACTCTTTCCTTG  
TCTTTCCAAGTGCTTTGGTGGATGAGCACAACACTACAGGAAAAGGGTCTCACAGCAGGTAACTCCCACCACCACC  
CACACAAAGGCAAAGTCACCTGGTGAACAGGAGCAGATCACCTGTCTCTGCAGGTTGTTTCTGTTTAGCTGCA  
TTTGGAGAAAGCATTGGAACAGTTGCTGCCTGCTCTGAGAAGGGCTCTAAGGGTACAATGTATAGGTCTGTAG  
AATTGCAACAAGTTTGGACCCTAGAAAAGTAATGGGTTGCTGAAATGGTCTGGACTGTGAATCTTAGGGTCTTGC  
TAGGGAATTTCTAATCTACAGTGACATTTAGACATTGGAGCAAGCAGAGGTGCTTTGATCCTTATCTTAGGCACTC  
AAAGTTGTCTGGAAGACAATCGTTGTGACTGTTTGTGAGGCTTTGCTGGAGGAGAGGGGATATTGACAGCCCTC  
TACACGATCTGCATGGCACAACACTAGAGCTTTCTTTCTTATGAAGCATATAAGTACTGAGGGCAAAAACACCACA  
GGAGACAACCTATATCAGCGTCCCTTAAGTAAAATCTTGTAGTGTATGAAATAGTGTGCCTTGCAATACTGAAGT  
GGGTGCTCACAGTCATCTATAGGATGGAATACAGGGCCCCCAATATAGGAGCTAAAGAAAGTACCCCAAACTGA

AGGGGTCTGCAACCCTATAGGTTGAACAACAATATGAACTAACCAGTACCCACAGAAGTGTTCCTCTAGCTGCAT  
ATGTAGCAGAAGATTACCTAGTCAGCTATCATTGGGAAGAGAGGCCCTTGGTCTAGCAAAATTTATATTCCACAGT  
TCAGGGGAATGCCAAGGCCAAGAAGTGGGAGTGAGTGGGTAGGTGAGCAGGGGGCAGGAGATATAGGGGACT  
TTTGGGATAGAATTTGAAAGGTAAAAGAAGAACATATGTAATAAAAATGTGGGGGAAAATAAAGAGACTAGGTC  
GTTTCTACAATTAGGGAAAGTCTCATTACTTTATCCATTAATGTGCACATTAATAAAAAAGTGGCTAATGGCTTT  
GAACAGGATCCTTGCTGAGGACAGGATCTTATAAAGGGTCCAGATAGACAACCTATTACAGTTTTACAAGCTAG  
TACTTATAACAATTGATCATTGGGAGCCTCAAGCTGAGACACCCGATCACTGGGCATAAGTGTGAGATAATTTG  
AAGATATTTCCATTGTTTTGAATAATCTGTATGATATTGGATACATTTACTCTATGGAAGGAGTATGTGTGTGGAGT  
CCCTTGTGTCAGTGAAGTAGGAGTTGTAACACCTGTGGCGATGATGCAAGTTCATATCTATGATGTGTTTGTGA  
TGTCAGTATTTATAAAGGAGGAAGCATCTCTGAGATGCAATAACACATTTAAAAAAGAAAACCACAAGACAAAAC  
GGAAAGGGAATATTGACTTATGTTGTTGATTCTGTTTTGTGTGTGTTGTGTGTGTTTTGTTTTTTGTTTTGT  
TTGTTTTGTTTTGTTTTCTTATTTGTGTGTATGGTCTGATTTTTGGATTTTTTCGAGACAGGAATTCTCTATATGCC  
CCTGGCTGTCCTGGAACCTACTCTGTAGACCATGCTGGCCTTGTACTCAGAAATCTGCCTACGTCTGCCTCCCTCGT  
GCTGGGATTAAGCTGTGCACCACCAACACCCTGCAAATATTGCCATTTTTAGTGAGATATTTTAAATGTTTTTTAC  
TGATTTATGTAAGATATTTTAAATGGTGTGTCCATTTTTTTTACGTTGTTGCATTATTCCTTTCAAAGTTTGTTGATT  
ATTGCTCACAATAACAGGATTTAACATTAGGACACTGACATTCTTTTTTCAATTCATTCTCTCTTTTTTTCTGTTT  
AACTTATCTGGAAATGGATTTTTCTGTATAGTCCTAGCAATTCTGGGCCTTCTGTGCAGTTCAGTCCTGAATCAA  
ATCTACTGGATTTTATCACCAAATCCTGAGATTAACCCCTTCTAAGCAGACATCAACATTTTTTTTTAATTTTCTGT  
CTCACAATACTTCTTTAGAAGATGTCCTCATCACAGTTCCTCAAGTAATGCCTCAGACACTTCTAACTTCTGTAGCA  
ACCTTACCATATAGAGCCTATGTAAGGCATCCTGTTGGGTAGCATTCTGTCTTAAGCTGTCCACATCCAAAGTGTTT  
GTATTCTTACAGTGGCCTGTGAGGTTAGTGTGATAAATCTGGGATGAGCTGTCAGGTGAAGAATTATCCACACT  
GCAGCCACAAAGCTTGCAAGTTTCCACTGCTCCTGATCATGATGCTGCAGAAGGTTTCTTTGATTTTCATAGACACTG  
GCTTCTTATCCAAAATCTTGGTATTGGTACTGTATTCTGCCTGTCTGTGTAACAATTAGACATGAACCATGTCTTA  
GTATACTGGTTGAATCTTGAGAAGTTTGTGTTCTTTTTCTGCTGGATAGCCTGTTACTGGGGAAATCAGGCCATCAA  
GATTATTCTTAGCCTGGAAGGTACAGAGTCAGGGTCAGAGGAAGTGTGAAGTCTGGGTAAGGACTAGTCTTAAT  
CCACATATTCCCTATGTATAAGAACCATAATTGTCAACATTTCTCATTAAAAAAAACACTTGAGGTTTATATGTGT  
TATTCTCAAATGACAGCTATAAGTTTTTCCACTTAAACACACCCCTCAATATACAAGAACAGATATCTACAGGGTC  
CTTTATAAACTATTCACAGTTGTGCATCCCCATGGTCTCTGGTCTGTTTCCATTGTGAAAGGACATATGTTGAGAGA  
GATTTGTTTACCTTTGGTCTAATGATGTCCCTGGTCGTAATGTCTCAGTATTCATCCTGGTGTGAATACTGTGGAAA  
TCGAAAATGTTAAAGGAACCGTGAAGCAAAAATGTTAATTGGTGTGAAAGGGTAAATGGGAACAGCCGTTAGTTT  
CCACTGACTGAAACTAAAATATTACCTGTTATATTTACAAAAACAGAATTATTGCTCATTTGTTCAAAGTGG  
ACAGCCAGGTACAAATGAAATGACTTTTATCCACTGGGCTGTTTTTTTTTCAAAGCCTTGGCATGGCTCAACAAAG  
GAGTGCCTGAGAGCACCTGAATGTTGAGATAAAGTTTACTGAGGTCTCCTTGGCCTGAGAGTGCCTGTCCAGCTGC  
ACTTTTGAACAAGAGGAATGGGTGGGACATTCTTTGATAGAAACAGCAGGAGCTTGGTTGCCAGTCAGAAAATTG  
TTGAAGAACAGCAGCAGGCTGTAGTGTGTTGAGATTGTCAGACACCCTGTGAAAATTGCAAACCCAAATTAACCTG  
GAGCTAAAAAGTTAGAGATCTGATTAAGAGGTAAAATCTTGGATGTTGTAGTGAAGAGCAAAAACTTATAATTTT  
GGGTCTTATAGCATTGTGGTATGTAAGTTCAAGAAATACAGGGCTGAAGAATAGACCAAGGCGGGTCCAGGCAC  
AGCCAAACCCACCTGTAGCTAAGAATGTCCAGCCATAAAAGATAAAAAAGAGAATGCAGGAACTAGCCACTGCT  
ATCAGGGCAGACCAAATGGCCATCTGGCAGGATGGCACCTCCCTATAGATCCCATAAATCATACATTGACCAGGT  
GTCCTGCTGACCTCGAGAAGTCCCAAGCCCTGTGCCTCCCTACACCTTAGCATGCACATATTACCCTGTTAATTTGT  
AATCATCCCGCCAACATTTAATAAGCCTATCATGTGTAATGGCCCAAATTTTGGCTCCCTGTTTTTGGTTTTGT  
GGTTTTGCCTTTATATGCCTGTAAAAAGTTTGGGCCGGGGTGAAGTCCCTGCCCTGCTCAGTGCATGAGATT

CGACCCAGCATGCTGGCTTGGGCGCTCCTTTTTGTTTGTGTGTTTGTGTGAGATTAAGCTTGTATAGTTACAGC  
GAGTTCCGCCTCAGTGTCTACTGGGTGCGCACCTCCCTGAAGAGGGACTCACTGAAGGGGTCTTTCATGTGGTGC  
ATTGGCTGGGAGATGCGTGACCACCCAGGGGTCTAGACCCACTTGGAGGTAAGCCCTCTATCTTGTCTTGGTTT  
TGTCTCTATATTCTGTCTGAAAATCTTGTGAGATCACAGTTTCAGTTTTGCAAATCTCTTATGAGACAGTGCTTCGA  
AGGGAGAGCAAAGTGGATAAGGACAGATGTGTCTAGGTGTCCACCATTTGTTCCGCTGGGAGACTTTCAGGGA  
AGTCAGGGGGAGGGCCAGGGATGCCTAGTGAACCTCCTCCGAAAAGTCAGGGATAAATTTTCTCCTTGACGATC  
TGTTTCTGAGACCTGTTACTAGGCCGTCTGATTCTTTTCAGGAACTCTGGTTGACACAGAGTAGGCAACCGTTTTG  
CTTTGAGTCTTGTAGCCTTTGTAATCGTTTTAACATGTGTGTGACAGAGCTTAACATGGGAAAGACTGTGACGAC  
CCCACTAACACTTACTCAGAACCATTGAACAGACGTTATGCTAGGGCCAACAATCTTTTCTTTGATGTCAAGAAGG  
GACCTTGGCAAATTTTTGCTCCTCTAAATGGCCAGCTTTTGGTGTGGGCTGGCCTTCGTAGGGAAATTTTAGCCTG  
CCTGTTATTCTAGGTGTCAAGTTATTTTTCAGACTGCAGGAGGGCATCCTGATCCGGTACCTTATATAAATTGTGTGG  
CAGGATCTGGTACAAAATCTGCCACCCTGACTGGGTTCTGGACTTCCGGAGCTGAGGCAGCGATGGTGGCAGTA  
GCCATGAAACCGAAAATGATGCATGCGGGTCTGCCAGAGCACGTTCCATCGGCCCCCTGAGGATCTATCCTGAA  
ATTGATGATGCCTTTTTTATTGACTCCTTCCACCCCGTTACCTCCAAAGAACTTCTAATCCTGATCCCTCACAAGT  
CCCACCCAGCAGACCCAGGGTGGCCTCTGTGACAGGACCGTTGGGAGGGACTCTAGCTGCAAAGGCCATAGT  
TCAGAGGGAAGTGAATCTAAACCAGATCCACTGTTGCTTTCCTTAAAGAGCTTATGTAGGAGGACCTTCCCATGC  
CCCGGGCAGTTAGTCCATTGCAGTACTGGCCATTTTATTGATAGATATGTTGGCAGATATGTATAACAGATAT  
GTATAACTAATCACTCCTCTTCTCATAGAATCCCTCAGGCTAACAGGACTCCTGAGTTCCTAATGTTCTCCTACC  
AGCCCACTTGGGATGACTGCCAGCAACTTTTGCAGGTCCCTTTAGAAGTGAAGAGAGAGAGAGAGAATCCTGCT  
AGAAGCAAGATAAAAACGTCCCAGGACCAGATGGGACCCCACTTATCTCCCAACCTTATAAATGCAGCTTTCC  
CTTGGCCCCGTTCTGCCTGAGAGTTCAATACTGTGAAAGATAGGGAGCGTCTCACAGTCTACTGATGGACTCTAGT  
GCAGGGATAGAGCGGGCCACAGGGTACCACCAATTTGGCCAAGGTAAGAGAAGTCTTCAGGGTTCAATGGA  
GCTGCCCTCCGTTTTCTTAGCACGACTAATGGAGTCTTATAGGAGATAGCCCCATTTGATCCCTCTTAGGAGGGTCA  
GCAGGCAGCTGTAGCCATAGCTTTTATTGGTCAGTCTGCCTCTGATATTAAGAGAAAGTTACAGAGGTTAGAGGG  
TCTCCAAGATTATACTCTGCAAGATTTAGTAAAAGAAGCTGAGAAAGTATACCACAAGAGAGAGACTGAGGAAGA  
AAAGCAAGAGAGAGAAGAGAAAGAGGTAGAGGAAAGAGAAATCCGGCATGAACGCCAGCAGGATAGGAACTT  
GACTAAGATTTTGGCCGAGTGGTAGGTGGAGAAAGTTCAGAGAATGGTCAGTCAGGGAACCTGCACAACAGGA  
CAAGAAGACCCCAAGGAGAACAGAGACCTCCACTTGAGAAAGACCAATGCACATACTGCAAGAAAAAAGAATATT  
GGGCCAGAGACTGCCAAAGAAGAAGCAGAGGGGGCCCAAGTATCTGCCCTTGAAGAAGACAAGGGAAAGTTG  
GGGCTCGTCCCTCCCAAGCCTAGGGTAACTCACTCTGTGGAGGGGACCCCGTTAATTTTCTAATAGACACA  
GGAGCTGAATATTAGTCTTACTGAACTTTAGGACAATTAGGATCAAAGAAGATTTTAGTTATGGGAGCCACTG  
GTAGCAAGCTTTATCCCTGGACAACCAAAAGGATTTTAGACATAGGAAAAAATAAAGTGACACATTCTTTTCTTGT  
GATACCTGAGTGCCAGCACCCCTGCTAGGCTGGGAACTTTGGAAAAAATTGAAAGCACAAGTCCAGTTTACTTCT  
GACGGACCTGAGGTATCATGGAAGAAGAATCCAGTGGCATGCTTAGTTTTAAATTTAGAAGAAGAATATCACCTC  
CACGAACAGAAATCTGAGACTTTACCCTTAAAAGAATGATTGACAGGTTTTCCAGAGTTTTGGCAGAGCAGGCT  
GGGATGAAATTAGCTAGGCAAGTGCACCCAACATAGTCGAGCTAAAATGGCTGCCAAACCCGTTTTCAGTCAGG  
CAATACCCCATGAGTCAAGGGGCTAAAACGGCATTGACCACATATCCAGAGACTGTTATAACAGGGTATATTG  
GTCCCGTGCCAGTCCAATTGGAATACCCCTTCTGCCAGTGTGTAACATGGGACAAATGACTATCTGCCTGTCC  
AGGACTTAAGAAAAGTCAATAAGCGGGTACAGGACATTCACTCAACTGTGCCAACCCCTCACAACCTGCTGAGTTC  
CTTACCACCTGAACGGTCTGGTACTGTCTGGATTTGAAAGATGCCTTTTTTCTGTCTCAGATTACACCTGAACA  
GTCAACTTCTGTGTGCTTTTGTAGTGGCGAGTCCCTGAAGGAGGATATACGGGTCAGCTAATCTTACTAGGCTGCC  
ACAGAGGTTCAAAAATCACCCACTTTGTTTTGATGAAGTGGTCCACCACAACCTTATGCCCTTAGGGAACAGAA

CCTCCAAATTTCTCTCCTATAGTATGGAGATGATTTAATCCTTTCAGCTTCAACCCAGGAACTGTGCCTTGACAGGA  
TCAAGAAGCTTCTAAATGAAAAAAGTGAATTGGTGTACCACTAAGAAAGCTCAGCTATGCCATATGGACCTGACC  
TACCTAGGATACTCCCTCCGAGAAGGAAAGCAGTGGTTCACCGAAGCTCGAAAGAAGACTGTGATGAAGATCCCA  
ACCCCCACCACTCTGTGACAAGCACGTGAGTTTCTGGGAACGGCAGGCTTTTGTAGACTCTGAATACCAGGGTCCA  
CAATGTTGGCGGCACCTCTGTACCCACTCACTAAAGAAAAAGTCCCGTTCACCTGCACAGAGGAACACCAAAAAGC  
CTTTAACAGCATAAAGGCTGCTCTGCTTGCAGCCCAGGCTTTGGCCCTGCCAGATTTGACTAAGCCTTTCACCATAT  
ACGTTGATGAGCCAGCTGGAGTAGCCCCGACAGATCCTGACTCAGACTCTGGGGCCGTGGAAGAGGCCAGTGGCC  
TACCTGTCTAAAAAATTGGACCCAGTTGCCAGTGAATGGCCCTCCTGCCTAAAAGCCATCGCTGCAGTAGCCCTAC  
TTGTTAAAGATACTGGCAAGCTTACTCTAGGTCAGCATGTGAGTGAATCACTCCCCATGCGTTAAAGAGTATTGT  
ATGACAGCCCCCTGACCATTGGATGACAAATGCCCGGATGACCCACTACCAGAGCCTGTTGCTAAATGACCGAGT  
GACTTTTGACCTACCTGCCATCCACAATCCTACCACCCTTCTCCCAAGACGGATGACTCTACCTGGGTACACCAAT  
GTGCTGATATCCTGGATGAAGAACTGGATCGAGAAAGGATCTGACTGACCAAACCTTGCCAGGTGTGCCTGACA  
GGTACACAGATGGTAGCAGCTTTGTGGTGGAGGGAAAATAAAGAGCAGGAGAGGCAGTGGTTGACAGAAAACA  
TGTAATTTGGGCAAGTTAACTTCCAGAAGGAACTTCGGCTCAGAAGGCTGAGCTCCTGACGCTAACTAAAGCTCTG  
CGGCTGGCAGAAGGTAAGGCAATCAATATTTACTGACAGCCACTATGCTTTTGCCACAGCTCACATTCATGGGG  
ACATCTATAGACAAAAGGGGGCTACTTACTTTGGCAGGCAAGGAAATCAAAAATAAAGAAGAAATCTTGGCCCTCC  
TAGAGGCTATACACATGCCCAAGAAAGTGGCCATCATCCTCTGCCTTGGCCATCAAAGGGGCAAGGTGCTGTAG  
CCCAGGGAAATCAGATGGCAGGTTGGGTGGCCAAACAGGTGGTACAAGGCATCCCTGCGCTGCCTGTAGAGAGT  
ATAGAAGAACCAAAAGGGACCCAGAGATCAGTTTTGAATACACCTCCAAAGATTATGAGATGATTGAAGATCTT  
GAAGAACAAGGGAAGTCCAAAGGATTTAGCTACCATGGGATAGCAAGAACAAAAGAAGGAAAAATTATTTTGGC  
CTATAGAGAAGGAAAGGCATATGTAAAACGCATCCATCCCCTGACACATCAGGGAGCAAAGAAATTGTGTGATT  
AATCCAGTCTCAAACCTATTATGTGCTCAGGCTACTAGACGAACAAGTAACTAAATCCTGCTAGTGTGTTGCCTAAT  
TAATGCTGCAGGCCCTTTAATGAACAAGGAAAACGACAACTGGGGGATAGACCTGGAGTTTACTGGGAAGTAG  
ACTTCACTGAGATCAAACCAGGAAAATATGGTAATAAATAGTTACTAGTTTTCATAGACACTTTCTCAGGATGGGT  
AGAAGCCTTCCCACCAAGTCTGAAACTGCTCAGGTGGTACCAAGAAGATCGTTGAAGAGATCCTACCCTGGTTT  
GGGATCCCCAGTGTAAATGCTTGGAAAATGGGCTGCATTTGTTGCCAGGTAAGTCAGGAATTAGCCACACATT  
TGGGGAAACAATTGGAAGTTATATTGTGCTTATAAACCCAGAGATCAGTAGAGGTAGAAGGAATGAACAGGACTC  
TAAAAGAAACCCCTAACTAAATTAGCTTTTGGAGCCAGTGGTAAAGACTGGGTGACCCTCCTTCCCTTTGTGCTCCTT  
AGGGCCCGAAACACACCTGGGTGTTTCGGCATTACTCCTTATGAAATTCTACATGGGGGACCACCCCTTGACCG  
AGTCTGATGAGATATTGTATTCCAGTGCTGACTTTCCTCACCCCTTCTCTGTTTACCCATTTAAAGGCCTTAGAAG  
TTGTCAGAACACAGATCTGGGACCAGATTAAGAAGCATAACACACCAGGGAGCAGTGCAGTGCCCCACAGGTTCC  
AGGTCGGGGACTCAGTTCTGGTCTGACAACATCGAGCTGGCATGCATGAGCCACGGTGGAAAGGGACCTTATCTAG  
TGCTGCTGACCAGCGCTGAGGTGCGAAAGGTAGACAGGATCGCTGCCTGGATCCACGCATCCACATAAAAAAAA  
GGCACCCAACCAGGATGAAGACGACCTCAGAGAAAATTGGACAGTGGCCGCTACTGATAATTCTCTTAACTGTG  
CCTTCGCTGTACACCAACCTTGGGTAATAATCCTCACACTCTTATGACCCTGACATGGGAGGCCATCTCTCAAGCTG  
GAGATACTCTATGGAGTACTTCAAAGCCCCCCCCCTTATACATGGTGTCCCCCTCTGTTTCTGAAATCTGTGCCCT  
GATAGATGGATTAGATGCCTGGGATATCCCTGAAGAGTCACATGAAACGGTGCCCCAAGATGAGGTAATCTATGT  
CAAGCAGCCATATCACCAGGGGTTAAGTTCCAAGGAAAGTACATTGCAGATATACCAGGCTGTAGTAGCAGGTC  
TCAACAGAGGAGACTTTGTCAGGAGCCCTTTTATGTCTGTCCAGGGATAGGGCAAATAAAAAAGAGTCTCGCTG  
GTGTGGGGGAATAGAGGGCATCTTCTGTAGTCACTGGAGATGTGAAACCACTGGTACCACCCATTGGGACCCTTC  
CTTAGCTTGATATTATAGTATCCAGATGAAATAAGGGCCATGATTCCTTAAACATCACTTTTACTCAAAAAGC  
AAAAGAGACAAAAAAGATTGGATAAGGGGAAGACTGTGGGGCCTAACATTTTATGTGACAGGGACAGGCCCTGG

ATTCACATTTAAGATACGGCTAAAGATGAAGTGTCCCCAACCCAGGCAGTAGGACCTACCCCGTTCTTGTTAAA  
AAACCTCCAATGCCCTTCCCAGACCTACTTTTCCCGGACCTACCCTAGTTGTTCCAGCTATTCCAACAGAAGTCTAT  
ACCCCTTCCCTCAGACCTGAACTTACATTGCCCTACTCCCCAGATACTGAAAACCGTCTGTTTAGTCTGGTACAG  
GGGGCTTTTTGGTACGCAATTGTACCAATCCCAACATCACTAAGTCTTGTGGCTGTGTTATGCCTCCAATCCCTCA  
TATTATGAGGGAGTTGCTCAAGTCAAGACAAACAATAAGGCTGAGGACAATTCTCAGTGTCTTGGGGAGAAAAC  
AGAAAATAACATTAGCAGCTGTCTCTGAAAATGGACTTTGCCTGGAACAAGTCCCACATGACAAAAGGGTAACTCT  
GTAATCAGACTCATCATCTCCAGTCTTCCAGTAATAGAGGTGAGTACTTAGTCCCTCCCTTAGTCACAGTATGGGCT  
TGCAACACTGGACTCACTCCCTGTTTATTTACATCTGTTTTAATACTTCTAAAGATTATTGTCGTTTAGTTCAGAGG  
GTTCTAGGCTTCTGTATCATGATGACAGTTTTTTGTCAATGGATTCAACCACTGGACCCGGTATAAAAAGGGAACC  
CATTACCATGACCTTAGCAGCGTTTTGGGTCTAGGAACAGCAGCTGGGGTCGGCACAGGCACAACCTGCCTTGAT  
ACAGACCCCAACTATTTTCATGAATTGCACAACCGCTATGGATGCAGACCTAGGAGCACTAGAGCAGTCCATCAC  
CAAACCTGAAGAATCTTTGACCTCCCTACAGAACAGGAGGGGGCTAGATCTACTTTTTCTCAAAGAAGGTGGACTC  
TGTGCCGCACTAAAAGAAGAGTGTGTTTTATGTAGACCATTCTGGTCTTATCAGGGACTCCATGGCTAAGCTCA  
GAGAAAAGTTAGAAAAATGAAGCAAAGAAAGAGAAGCGTATTAAGGATGGTATGAAAATTGGTTTAAACAGTCT  
CCCTGTTTTACGACACTGATTCCACCCTGGCAGGCCCTCTGATTATTTTTCTCCTGCTTCTTTTGGCCATGTATT  
TTAAATAAGCTGGTTGCTTTTGTAAAATAAACACCATAACAAGTCATGGTCTCAGACAGCAATATCAACAAGAAG  
AAAGGTCGTTCTAAGATTAGAGCTATCCACTAAAAGAAGTGGGTAATGAACAGCAAAAACCTTATAATTTGGGTCT  
TATAGCATTGTGGTATGTAAGTTCAAGGAATTCAGCGCTGAAGAATAGACCCAGGCGGGTCCAGGCACAGCCATA  
CTCACCTGTAGCTAAGAATTTCCGGCCATAAAAAGATTAAAAAGAGAATGCAGGAACTAGCCACTGCTATCAGGG  
CGGACCAAATGGCCATCTGGCAGGATGGCACCTCCCTATAGACCCATAAATCATACTGACCAGGTGTCCTGCT  
GACCTCGAGAAGTCCAAGCCCTGTGTCTTTCTCCATTTTAGCAGGTACATATTACCCTGCTAATTTGTAATCATCC  
TGCCGCCATTTAAATAAGCCAATTATGTGTAATGGCGCAAATCTTTTGGCTCCCCTGTTTTTGGTTTGTGGTTTTG  
CCTTTATAAGCCTGTAAAAGTTTGGGCTGGGGTTGAACTCCCCTGCCCCCTGCGCTGTGCATGAGTTTCGTCCTCA  
GCATTCTGGCTTGAGCGAACCTTTGTTGTTGTGTGTTGTACGCCATTAAAGCCTTGATAATTACAGTGAGTTCCG  
GTCTCAGTGTCTACTGGGTGCGCGCTTGCCCAAGAAGGGACTCCCCACGGGGGTCTTTCAGTAGGTTTTCTGAAT  
AAGTTTGTATTACATGGCAAAAAAAAAAAGATTTATTATATTCAATTTCTTCTCCTTCTCATGGTGTAAAGGCATATAT  
AATGCAATTGAATACTGCACATTCGGATTATTAACAGTTTTATACCAAGTTCCAAATTTAACATAACCACAAAATGAG  
AAAGCGTACAATATATATTCCAATCATGAATAAGCAAATGAATGTAGAGAAATAGTTTGCAGGTAAGATAACAT  
AGCTATTAAGACATGATCAGAACAATTTAGATCAGAGGATATTAGCCTAACCCCTATGACTTAAATTTCCCCTGGC  
TGTATACTCAGAGCTCTGTGTCCTGTCTGTTGCTGATTGGAACAATGCTTTGTTTTTTCAGTAGCTTCTGCATGAATT  
TAACATGGTCATACTATAGACCGTCTTAGCAGGAATCACTTAATGTGGATCTAGGAATCTGTTACCTGTAGAG  
AAGGGCCTCTCTGTTAAGAATGATCAGTGACCATTGTACCTCATTGTTTCTACAGAGGATCCTAAAGGGTGCATAA  
CCTGCTGTGAAAAAGATCTAGGCCCTCTAATCCATGACACAAGCCTAGTTTTCCATTTGTTTCAGTTATGTCAGATTTT  
GTACTAATATATTAGGCAAAGTAATTAAGTATATATCTGTTCTATCCAAGATTTTAACTATTGGTTGCTATTT  
TGCATTGAATCCTAGAGCTGATGAACCAAGTAAAGAACAAGTGGGAAATCACCTAGATAAAAGAGATAAAGTGTGT  
GATGGTTACACCTTGTAAATGGCAATGACTCTTTGAATTAAGAGGCCTTAAAAAGAAATGAAATAGAACTTGAGTT  
TCTCAGTAATGTGAGTCACTCTGGTATCAGGTCTCTTTAGCCTGAGGATACAAGAGAAGACTCTAACCAACATCAT  
TGACAGTCTTGGTCTTAGGTCATCATGATATCCCTTTCTATGATCCCAAGTGTATTACAATATAATAAGTAGACACA  
CTAAAGGCAATAAAGTAAAGACAGCACTAATCACTGAGTCTAGGCATGCTAAATGCTAGGCAGTCACTCTGTCAA  
CTGAGCTATGTACAGACTCTGTTCCCAATATTACAGATTTAAGTTTTTCCAATGAAGCCTAGAAGCTGCTTTTGA  
AGGAAGATGTGTTCTATGACTATGTCCTAGCACAGTCTGCTGGAATGGCACCTCAGTTTCTGGTCAGTACTAGGA  
GAGCAACAGCAGGGAGGTAAGGCTATTCACTATTGCGTCCCGCTCGACCGGCAAGAAAAATACAACAACTAGA



ATCTTCCACAGCAAGAGCTTTATTGCTTGCTTATCAGGAAGATCCCGAACCGGGAAAATGGCGCTGCTTTTATAAC  
CTGCAGCGTGACATTTACAGCACCTGATATGGCATGACAGCTCCTGATTATTGCTTGCCCATCACTTGACTATTTCA  
CCCCGAGAATGGGAGTGACTAGGAGTGAATTCCTCTCGCACCTTCGTACAAGGCTTCTTTACTAGTTAGCCACAG  
CGGAGGCCCGGCCATCTTATAATGGCGATTGCTCGCGGCACACACGGCTCTCCTCAGAGATTACTGGTGGCATG  
CACGAGATTGCTCGCAGTAAGTACCTGCTCTCCACATCTTCCCCTTTTTATTTTATTA AAAACTTGAGGCTGGTCTAGG  
CCTTTGTAACCTTGCCCATCCACTGTGGCTCCTGTCTTAGGTCATTCCCTCAATGTCACAGCCTTTCTGT CATAGGG  
TAACCCTATCGCCACTGGGCCCCGTGTCTTAGGTTGATCTGTGCATGAGGAAAGTTGCCCGTCCCTGGATAACCACA  
GTGCTATGTGACATTA ACTACTAAATAAACTAGGGCGAACTCTATAAAAGAGGACAGCCACCAATGTCAATTAATT  
TTTGAGCATAGATAGCCAGATTTAGGGAAGGCCCTTGCTTGATGGCAGCAAGTGCTTGGGTTATCAAAACCTTG  
TCACGTGTTTGTGGGTTCTGAGCTTGCAAACCAACCAGAGCATGACCACAAGTCCACAGCAGGTGGCAACGCCA  
AATAAACCTACCCCCACCCATTCTTAAAATAAGAAAAGGCAGATGAAATCCAGGAGGAGAGGAACTCTGTCAAT  
GACAGTCCACTCGTGTGAGTTGATCTTTAGAACGGCCGCTCTAAGGACCTCAAGGCTCATCGAATCTTTAG  
ACCAGTTTCTGCAAGATATAAAGAAACCTGTCTAGACATATTAGCTGCATAAGTAAAATTT CATATTGGACTG  
GTAATGCACAGAGCTTCCAGTTTTCTTTCACAACCAACTGGGCCATCTGGTATAGAACACCTATCTGTTCTTCCGC  
CAGGTCAAGGCACTGATTCAAAGTCATCAGCCCTCCCTTAACTTGGTACTAGCAGAAGTTGGACAGTGATGGCA  
TCAGCCAGATCTGCTGAAAGCTGATTTAATTTTGTGCCTGATTGAACCGCACTAAACATAGCATACCCTGCAGCTGT  
AGCAGCAGCTGCACTGGCTGGAATTGCTATGATCACGGCAGCAGTAATGCCAAAATCTCTTTTTTCAAAACATA  
GATAAGATGGAGGGTGTATCCACCAGAACAGGGATCCAACGTGGGATCCATGCCACCATGGCACGGGTGTTCTTT  
GTTACATCCCAACATTGAGAAATCCAACAATTATCATTGGAACAGATTTCAAATGAATCATTGAAAGAATAAACA  
AGAAAGAGGGGTAAACACAGACTGTGGTAGATGGATAATTAATCTGGTTTACCAAAGTTTTATTAACCCAGTGA  
TCTCTGCACTGGTATTACTATATCCATAAGAGTCCAGGGAGGCATCATGTATCCCAATACTGAGCAAATCTTGAG  
ATGCCAGTAAAGAAGCCTTCCAACCTGCTCCTCCCTGGATAAAGATCAAAGGATTGAGTTCTGTACA ACTGCCAT  
TGACTCCACAAAGCACCCACTTGTGAAAGGGTGCATTCTAATGTCCTGTATGAAAAGTCCCTTTTTCATAACAAAT  
TCCTTCTCTGGGTTATCTATCATGTTGGGAGAAAAGGAAAAGGTTTTACTCTGATCTGCCAATGAGTGATGGAGG  
ATTGACAATCAGACCAAGGCAGGATCAGCCCTTCATCTTCCAACTACAATGAGGGGCTATTTTTGGTTGGTGTGG  
ACGTTTTTTGTCTGAAAAGTTAGGTGGTAGAAATGTACCATTAACCAATTTACCTCGTGCCAAAAGGTCCGATTTG  
TAAAGGTTATCTCTACATTGGAAGTATCTTGGGTTGTGCTCATGCAACCTCCTCTATGCTCATTAACTTCCCCAAA  
GCTCGGGCTGTGAGGTTGATACAATTTCTGGTCCATTAATTCGAAAACATAAAGAACCCTGTTCTAGTAAAGTGC  
GATTTTCTCCTAATGGTGCTCGGGTTGGGATCATAGGGTAAATATGGCAAATCCACTGTTTTATCAGTAGTAAAGA  
ATTTTGGAAAACTATAGCATCATAGCGAACTGGCATTGGTTTAGGGAAAGTTGAGAGAATAGCCATCTCTGCTG  
GCCATTATACTAGGAACCTGAGACAAGTTCAGCATTGTCAGGATCAGGAACAGTCCCTCGGGAGGTCAGCATCTT  
CTGCACCATCCTTGATGAATATCCTGGGGATGAGTCATTCCGGCAGCCAAAATGGGTTGTCTTCACTCTATGAAAA  
AACACAAACAGCTCCCCAGGATCTGATTAAGATAGGATCCGGGCCCTTTCCACTGACCAGTTAAAACATCCTTCCCTT  
TGACCATTTCTTTGGTCTATCAGGGTCTGAGCTATGTCGCTCAGCTGCAGAGTGTCCCTGCTCGTGAGATTCAAA  
AAATTAAGTGTAAGAGTGCCATAGATACTGCTACTCTTGGCACTGAGGGCAGAGTCTCATCAACTCCCCCTTCT  
GTTTTATAAGATTTGAGTTTGCGGTGGGCACATTCCACAATGCCTTGTCTTGAGTATTATAAAGAAGGCCAGTCA  
AATGAGTGACATCCATTTGATGACAAAATTGTTGAAATTAAGTAGAATTATATGCTGGCCATTATCCGTTTTTAGA  
ATTGTGGGCTTGCCCCACACACTCCACGCTTCTAGGCAGTGCTGTATAACATGAGAGGCTTTTTACCTGTTAAAG  
GTGTGGCAAATATTACACCAGAGCAGGTGTCAATAGAAACATGTAATATTGATTTCTCCAAAGGAGGAAATAT  
GACTGACATCCATTTGCCAGACCTGTAATGTCCTGACGCCACGAGGATTTACCCCTACATGAGGAGTAGGTA AAAA  
TTGACAACAGTTTTGACATTGGGTGACAATGTCACGAGATCTTTCCTGGTTAAAGTAAAACGGTGGTGAATGTC  
TCAGGTGTCACATGAAAGCATT CATGAAATCTCTTGCAGCCTCTGCTGTGAGGACAAAGCAGCAGCCACGATTC

TAGTGGCTTTGTCTGCTAAGTCATTTCCATGAGACATGAGGCCAGGAAGGCCAGAATGACCTCAAACATGAGTAA  
TATAGACAAGATGTCTTTTGTATAACAAGGCTGACTGAATCTTTTGAAAAATGTGAGCAAGCTTACTAGTTGGTTTA  
ATTAAGCCTGCAACTTCAAGCATATTAAGTGCATTGAACACATATAAGGAATCAGATACAATATTGAGCGGTCCCA  
GGAAAGTTTCAAGGACTTCTAGAACTACCAAACACTCTACAACATGGGGTGATGAATCATTATATTGTTTAGATGT  
TACTTGGCCATTTACTACATATGCACCTATACCAGATTTGGATCCATCTGTATACACTACTACCCCATCCGGAAGTG  
GGTGTGTTGACTGTTATTATTGGAAACACTATAGCTTGGCTGAAGGCAAATTGTAAAATTGTATGTTTTGGATAATG  
GTTATCAATTTGTCCTGAATAGGAGGCAACCAAGACTGCCAATCGTTGGTTGTTGCTGCCAGGGTTTGAACCTTGA  
GCAGAAGTATAAGGTACTTACTATATAAGGTTCTTACCCGAAATAAGTAATGGCTGCTTTTATCCCCCTAAGTGC  
AAGTTGAGCAACTGCATTAGGATACCACTCAATGATTTTTGCAGGGGAAGCATTAGGATGGACCCACAACAAGGG  
CCCATTTTGCATAAGACCACTGTGGTAACTGTGCAGTTTTTAATATGCACAATTCAAATGACTTTGACTCGTCAAT  
GCGTTGTAATTGAGCATCTTGTAGGGCCTTTTCTACAATTTGTAAAGCTTGACATGCAGCTGGGGTAAGTGCTCTG  
TGGGAGGAGATATGGGTATCTCCCTCTAATATGTCAAATAAGGGCTTTAATTCTGCTGATGGAATTTTCAAAAAGG  
GTCTCAGCCAATTAATATCTCCTAACAAATTTTTGAAAATCATTCAAGGTATGTAGTTGATCTTTGCGAATCTCTAAT  
TTTGAGGAACAATTTTGTGAGGATAAATAAGTGACCCTAGGAAGGCTCCCATTTGAGCAACTTTTACCTTTTCCGGT  
GGCCACCTGCAATCCCCATTGCCCTAACGTTTTTATTAATATAAGGTATGCATCTTGCAATAACTCTGAATTTTTATG  
GCAAATCAAAATGTCATCCATATAAATTATCACCTGTAATGATGGAAAATGTTCTCTAACTGACTTAAGTGCCAATT  
GTACATACAGTTGACACATGGTGGGGCTATTCGCCATCCCCTGAGGTAGGACCTTCCATTGGTATCTTTGATCTGG  
CTCTAAGTAATTAATGGCTGGGATCGTAAATGCAAATCTTGCCTATCTTGAGGGCATAAAGGTATAGAGAAAAAG  
CACTTTTTAATGTCTAGGATTATAATTTCCCAATTTTTGGGTAAGGCAGAAAGTAATGGTAGCCCTTGCTGAACTGG  
TCCAAGCAGATGCATTTGCGCATTAAATTGCTCTAAGATCATGTAATAAGCGCCATTTGCCAGATTTTTTTCTTAATTAC  
GAAAATAGGTGTATTCCAGGGTGAGTTAGAAGGCTCTAAATGCCCAAGTGTAGCTGTTTCCAGAAATTAGTTTTGTG  
GCTGCTTCTAATTTTTTCCAGAGGAGAGAGGCCATTGGGGAAACCCATACAACCTTCTCTGTAAGCCATGGTATGGGCA  
TGGAACCTCAACAGCTGTCTCTAGAAAAAATCCAAACCTTGTCTCCATTATTACCTTTTTGAGGGATAGGTTCAA  
GTTTACCCTGCTCTCCTTTTCCCTAATCCCCTTCTTTATAGCATATTTTCTTAATCATTTCGAACAGCTTTTGGCGA  
GCATGCATTAGTTAAGGTCAGTCTAGTGCCTGTAAGATGTCTTCCCCCAGAGATTTACTGGGAGTGGTAAGACA  
TAAGGAGTGAATCATCCATTTGACCTTCAGGCGCTGTCCAGCTCAAAGAATGGGAACTAATAGTGGGACAGGAC  
TGATAACCGAAACCTTGCAAAGAATGTTATGACTGAATAACTGGCCAAGTTTTCGGCCACCAGTGAGAAGAAATA  
ATACTTTTGTCTGCTGTGTCTAAAATCCCCTTAAATTGTTTTCCCTTCTATAACTAACTCTAAAGAAGGCCTGGAA  
TCTAAAGGCATTATTAATAGGCCGAATCATTTCAGTAGAACCAATCCCTCTGGTAGCTTGAGGGACACCAGAAG  
AGGGAAAACAGCCATGTAGGCTTGGCTGAATTAATACTGAGCTATTCTATCTCCTTGTGAAATAGAAACGACACC  
CTGAGGACAGGAACAGAGAACTTGAAGTCCCCCTTATAATCTTGACCTACATCTCCAGGGTGAACAATAAGACCT  
TGTAGTGAAAGGGAAGCCCTTCCCAATATTAGGCCGACACTCCAGATGGCAGAGGTCCTTTATAGTCAGTAGGA  
ATAGGCTGCTCTCCATTTGAGGGATCAGCATGAATTGAGTGGTGGTACGGAGGTCCAATCCAGCTGAGCCTTCT  
GTTGCCCTGCGGACTGTGGGGTCCACCTTTCGCCTGTCGTGGTCCCGTATGTTTTCGGGCCCTAAGACCAGAGGGC  
CCTGTACTGGTTTTTTGAAATGGTGTCTATTACTACTGCTTGGGGAATCCTGGCTGCAGGAGCCTGCCTCGAATG  
TCCCTGATTGAACGACAAGCGCTAGTCCAATGATATCATTTCACACTTAGTGACAATCCTGGTGCTCTCCTTTTA  
ACAAGGGCTCTACAGTCTTTTTTAAGTGTCCCGTTTTGCCACGATTATAGCAGAGTTTGGCTCAGCCATGTCAG  
GGCATTTTTGCATTGTAGAATGGCAGCTGCTAAACCTGCATTAGTGAGTGGCCCAAGTTCACGGCAAACCTT  
CGACCAGTCTGCAGTCCCTTGCCTTTTCCAGGTGTAATAGCTGCCCTGCATTCTGGGTAGCCTGTTTATATATCA  
ACTGTTCAATTAAGGCATAGCTGCTTTTGTATCTCAAATATTCTCCCTGCTGCCTCTGTCTATTCTAGCCACAAAAA  
TTGAGTATGACTCCTGGTAGACCTGAGTGATCTTGGTCAAATGCCCACTTGCCTCTCCCTTCTTAGAGAGTGCCTTA  
CATGCCTTAACAGCGGCAGCTGAGATCTGGGCGTATGCTCCCAATAATAATCTGTTTGGTTAGCAGCATGCTGTC

CCTGACCTGTAAGCAATTCAAATGTCCATGTCCTTTGGTTTCCTCCATGGTGGCATTGGCCCTTGCTGCGTCTGA  
CAGGAGTCCTGCCAGAAAACCTTCCATTCAAGATACATCCCCATACTGGGGGCTGCAGCTTTTACTACAGTCTGGC  
AATCACCAGGAGTCATAGTGTGAGTTGCAAGCCTTCAACTGTGCTACAGTCAAATAGCTCTGACTCCATAACA  
CGGACTGTTTCTGCAAGCTCCTAATCTGTATATATTCTACTGTAGCGTGAACATGCCCTCCCTCAGCTCTTCAAAA  
ACTGGAAATGCCTGTTGTATCTTCTCTGTTCTTTTGGTATAAATGAGTCTGAATGATACCTCTGCACATAAGG  
CTCAGAATGGTGCCTCTGCACATAAGGCGGAGGTGCACTAGAACCCTGAATTTGCATATCCGAAGACTGCGCAAT  
GATTTGACATTTGTCTCTAGCTGCTTTCATATTATTCTGTAAGTACTGATTAAGTCTGCTTTTCTGACTGGTATCTTCT  
CCCTCACAACCTGTCGCTTTCTCTAAGTCTGTTTCTCATAGGAGCTAAGTTCCTTATCTGATTCTGAGCTACTG  
ACAGCTAGCTGCTTAAACTCATCTAGTGGTGGGTAGAGGCTTCTTTCCTTATGTGCCTCTCCAGCTCGATCTCCCTT  
CTTCTCTCCCTTCCATCCCTTTTCTAATCTCTCCCAGGTATTTCCCTGACATTCTTTTTCTCTGTCTCAAGGCT  
CATGGAAAGGCCTAAATTCTCAGTGCACCTTGTTCCTCTCTATTTTTACTCTCTCTCCCTGATCTACCTCTGATAGA  
CTTTCTGAAATTCGTCCAGAACCTTCTGCCCTGCTTCTACCATTTGCTGACAATCCTCATCTGTTAAACATGATTTCA  
CCAATTTCATAGCAGCATAATCCCTGCTTTAAGTTTGCCTTTCTGCTGTTCCCTAACTAGATCTCCTTTCAGTTTGTCC  
CAAGAGGCGACAGTTAATGACAATGAGCAAGCATACCATGGTACAACACGGTCTATCTCTGACAAATCCCTCTT  
AGGTCTTAGAGGCGATTTTTAGGCCACACTGCTCAGGACTGAGCGTAAGCCCACTACTATAGAATGGGAGATTCC  
CATACTGCCGCTGTCCAGGCCTGACCGGGCTGAAATTGGTTGCTGTCCAGGCGCCGTCCAGGCCTGACTGCGACT  
AAGAACCAGTCAACAGTTCAGTGGTGGAAACAAAACGAAACAAAAGGAAAAGTGAATCGCCATGCAAACAA  
TCAAAGGGCTTCTAACTCTGGAGAAATTTCAAGATTGTACGTATCTGTAGAGCGTTTTGTCCACAGTTCTGATT  
CTGCCCCGTGAATGAGGGATCTTCTTGGCGTGGTGTGATGACAGTTCCTGGGTTTTGGCACCACTTATTGCGTCC  
AGCTCGACCAGCAAGAAAGATGCAACAAACCAGAATCTTCTCAGCAAGAGCTTTATTGCTTGCTTCTCAGGAAGA  
TCCCAGTCCGGGAAAATGGCACTGCTTTTATAACCAGCAGTGTGACGTTTCAGCACCTGATATGGCATGACAGCTC  
CTGATTCATTGCTTGCCCATCACCCCACTATTACCCCCGAGAATGGGAGTGACTAGGAGTGAATTCCTCTCGCAC  
CTGCGTACAAGGCTTGTACTAGTTAGGCACTGTGGAGGCCCGCACCATCTTATAATGGTGATTGCTCACGGCAC  
ACATGGCTCTTCTCAGAGATTACTGGCGGCACGCACGTAATTGCTTTCAGCACGTACCGGCTCTCCACAATTCACCA  
CGATATCTGCAGTCCCTTCTATGAATAGTCTGTTGTAACCTGGAGAATTCTGGTCACTCTGATACCACTACTG  
TTGTAGCAACTTGAATTTCTCTTAAACCAGTCACTCCCTTCTATAGAGATGATTCATCCCTGAAGCATCTACATGG  
GAGAGAGAATGTGGAGCATAGAAATCAGAGAGAGGCAGAAGTAATCTAGACTTCAAGTTGAGAAAAGAAAAG  
TGGTCTGGGAAAATACAGTGATTTCTGGGTAGAGAATATGGAGCATCCAGTAAAGGTAGTTCTGAACTGGCT  
TGTTTATCTTGAAGGCAGACTTGGGCATTGTATAAAGCTCTTGTAAAGATCTCATAACAAAATTTTGTCAATGT  
CTGACTCAGAAGTAATATTTTCAAGCAGTATCTAGGATTCATGCTGGAAAAACTGGAGAAAAGAAATCAGGATTTT  
GTGGGCCAAGGTCCATGACATAAGGCTTCAAGATCTAAATTGGCAAAGCTCATGCAGCCAAGAGAAAACCTTTAC  
ACAGACACCTAGAGTCTTGTGGCAATGAGCCAGGATCAAATTCACCATAACTATCCATATTTTAGCATTCTTGTGC  
TATGATAATAAAGGACACAGCCTGAGTTCATATAAATCATTAGGTCTGCTTTTATTGGGTTCTAACTTCTGGGGCC  
GGGCTCTAAAGCAGGACAAATCTTCTCTGATCAGCAGAAGATATAACATGACCTAGTCATGTGCGGCATGCATG  
CAGAGCTTAGAGAATGAGAACCCTGAAGGGGCATAGAACCTCAAGAGATCAAGAAATAAATTGACTTCTGTTTGG  
CATTTGCTGTGAGAGAGAGAAGCACTTAAGGCAGGGTCATCTCTGCCTTTCATTGTTTTCAGGACTCAACACTCTGC  
AACTTTGTTTCAATACCTTCTTCTGTTAACCATTAGCTTGCCTTTCAGCTCCTAGACTCAGTGTGCTGAGTGTGAA  
ACAGAGTATACTCTGACAGCCTCAGGAGCATGTAGATGTGTAAGTCAACAAAGTACCAATTCAAATGTGTTGT  
GTCTGGCCAGCGGCTCACATGTCTGGGTTCTAATCTGGAAAGGAATCTTGGAAACCTGGAAGAGAACAGGGAGC  
AAGGCAGAGAAGAGAAAAGATGTAGCTAAGGCAAAATTTCTGAACAAAGCTCAATTTTACTATTTCTGAAACTCATTT  
ATGAAGCAGGGGTAGGGACCTGATTTCCCGCAAATCATCTTGGAGTAAAGTTACAGGTGAACACGTGATGGGTCC  
AGAAATGCTAGTTAGAAAGCAGCAGCAGTGGGAGTGGCAGGGTTATAGAGCTGCAAGCTCTGCTGAGATGCTCT

CTAATACTGAAACCTGAGCAGATCAGCTGAAAATGAAAGGAAGCTTGTTTCAGGTATAAGACTAAAAATAAGGGTT  
CTGGGCATGGAGGAACAACACTTGTGAAATATCAATCTGATATATAAGGAAAAACAGAAATAGACTAGCAACAAC  
CAGTCCCAGAGAATAGAGGGAGATAGCTTACGAGGTTAGTCAAGCACCATTTGCTCTTTGGAATGCCTAACTGCTC  
ATCCATCCAATTTTGCTTTTAACCATCTCCTTTCTAATCTACCAGCCAGATAATATGCAAAGCCTGAGGGACCTTCTA  
ACATTCAGTCCTAAAAGGGAGGTCACCATCAAATCTCCACCTCAGTGTTTCAGGAAACACTGTAATAAAAAGACAGAA  
ACAGTGTAGGATCATAAAAACTATCTTGATTGTAACACTACTAGAATTTAGTCCTAGCTACACACTTTTATTAAAAAA  
CTGACATCAATGAAATTTATATTTTACAGTTGTTTCTACAACAGAACAACGATCTACATTTGGGGTTGGTCTTCT  
ATTTACATAATCAAATCAGGAAAAAAATTCCTCACAGGTGCCCAAATCCCAGAGTTTTAGTGAATTCCTAATA  
TTATCAGGGTTACAACCAAGACTAGCCTTCATAAGTATACCTCTTGCAATAAGACATACAATCATATCTCCTTATAT  
TATATTAATTTCCAAAGGAAAGCAATAGTTATGCCTAGCACAGTATCCTATATCCAATATACAACCTGCAAATAAAGT  
ATATGAATTTCCAGGGCAGAATCATGCTTAACATGAGATAAAATTCATATACAACACTACAATCATATTTAATCTTTT  
AGAACAGATTACAATTTCTTAATTGTAACACCATATAAAATCAAATTCAAAGCATTGTTTACTTTCAAAGTACACTG  
ACATGATAATACATTCTCATTCAAATAAGAGGAAAAGAAACATAAACAGAAAATATTGGGAAAATCAAGATCAA  
ATCTAGCTAGACAAAACCCCAAATCCTAAATTTATGTACATTGTGGCTTAAAAAGCTCTTCTATCTAGTTTCATGACT  
ACAATATATTTCTGTCTTGGGCTGGTTCCATTCTTTGTGTGAGCTTTCTTTGAGAGATATCGCACAGCTGTGGA  
CCTTCTACATCCTGATTGCTATATCACAATATAGGCTTCCTTTTCATACCTTCACAAAAAGCCTCTCTAGACATCTAT  
TCAGGGACTTCGCTGCAACCTGGATGCCCTCAGTGGCTTTCATAACCATGTAGGAAGACTCCATGGCTCTTTTCT  
TCTGTATCCTTCATTAATCTGATGAAAGAACTACATGGTGGATGTTGCCAAGTCTTTTGCTGCTTTAGATAGAAC  
CTGCCTGCTTCTTGAATATTTTTTCATAAATTTGATATGTTGTTTTCTGCTATAAACAGATCAATCCTGGGACATT  
TCTTTGCACAAGTTGCAGGATTAGCTTGGTGGATACTCACCTCGAGGAAACAATCCCTTTATTACATTACTCCTTAT  
ATCTTTCAACACTAGCTATGGCTCCACAAAAAAATTTCTGGTGTCTTTTTTTCTCCAACTTAAATTCTAGCTCAT  
CCCTTAAAGAATGAGTACAATCAGGAAAACAAAAGTCAAGAAGCATTAGCGATGTGGGAATAAAGTACAGCTGTT  
CTGCTGGTGGTGCTTAAGTTGGTACATCCAGGATAAAATCAGTGTGGAATTTGCTAAAAATATCTAAAAATAGAA  
CTAACTGGTGACTCACCTATATCACACTTGAGTGTAGAAAAGATAGCATGGTTATCTATTGATACTTGCTCAGTCAT  
TTTTGTTGATTTGTTTTCAAAAAAGGAGATGCAATCAGCTGTAACATAATTTGCTAGAGAGTATATGGAATTTGAA  
AATACTATATAGTAAATGCGTTAAGTCAGGCCTATAAAGAGAAATGCTACGTGTCTGTAATCACATTTGGTCTAGC  
TTCAACTATTAGATTTTATGTTTAACTTGGAGTATCTGTGGAGATAAGGAACCCCAAAGTGGCACATGGCATGGAA  
GAAAGGATGAAGCCTTAGGGAAGGAGGGAAATGACAGAACACATGCAACATAGTAGGAGGAGGAAACATTAGA  
GATTACAAGTTTAGGTAAGCATGAGTATAGGATTATGTCTGTTATCCCATACGGAATGCCACATTGTAGGAATTTT  
ATTTAAAATATTACATTTAAGTGGCATTACTCTTGGTTACAGTCCAAAACCTTGATACTACAACACTTTCTGAAGAAA  
CCACATACTCGAGTAATAGAACATGAATAAATAAAGTTATAAACAATCTTGAATTTAATCTTAGGGCTTGCTGTT  
ATATAGTGGCAGAATGTTCTGTTTATGCTACTAGCAGAAAAATTAATCAAGAATATTACACATCTGTGATCCCTGAC  
AACAAGATTAGTGACTCATTGAAATATACTGTGTACATATATATATCATCTAGGTTTAAAGTAATATATTCCTGTT  
GTCTATTTTTCTGTGTTTACTTCTAGATCATAGGAACTATTTTACCGTTACCTAGAACTGATTTTTAGAACGAGGACA  
GAATACTTTGTCTTAATAATTCATGCCTACCTAAACATAAATACACAATATTGTTTAAAAAATAATAATTATGAATA  
TTTTCTACCTGCATTGGGTAGTGCCATAATAAGTTCATATTTCAAACACTGATTAATAATATGAAACAAAAAATG  
TTAAATTTTAGGATAGATAGTTATAATACTTCAGAAAGTTGTCAACAAATTACACAGGGAAGGAGAAATAGAATAC  
ATCGATATCTCCACGTATGGTTATTGAGATTTTGGCCAGGTATAGTAGCCTGGGTTGGCATTGAGTTCTTACTG  
TCTGTATAACATCTGTTACAGGCTCTTCTGGCTTACCTAGTCTCTGGTAAAAGTCTGGTGAATTTCTGATAGGCCTG  
CCTTTATATGTTACTTGACCATTCTCCCTTACTGCTTATAATGTTCTATCTTTTTTTAGTGAATGTGTTTTTCTGATTAT  
TATGTGTTGGGAGGAATTTCTTTTCTGGTCAAGTCTATTTGGAGTTCTGTAGGCTTTTTTTATGTTTCATGGGCATCTC  
TTTCTTTAGGTTTAAAAGTTTTCTTCTATAATTTTTGAAGATATTTGCTGCCCTTAAAGTTGAAAATCTTCATTC

TCATCAACTCCTATTATCTGTAGGTTTGGTCTTCTCATTGTGTCCTGTATTTCTGGATGTTTTGAGTTAGGATCCTTT  
TGCATTTTGCATTTTCTTTGATTGTTGTGCTGATGTTCTCTATGGAATCTTCTACACCTGACATTCTCTCTCCATCAC  
TTGTATTCTGTTACTGATGCTTGCATCTATGGTCCAGATATCTTTCCTAGGGTTTCTATCTCCAGCGTTGCCACTT  
TGGGTTTTCTTTATTGTGTCTACTTCCATTTTTAGGTCTAGTATGGTTTTGTTCAATTCATCACCTGTTGGATGTGT  
TTTTCTGTTTTTCTTTAAGGAATTCTACCTGTTGGTTGTGTTTTCTGTTTTTCTTTAAGGACTTGTAACACTTTAGC  
AGTGTCTCCTGTATTTCTTTAAGTGAATTATTAAGTCCTTCTTGATGTCTTCTACCATCTTCATGAGATATGCTTTT  
AAATCCGGGTCTAGCTTTTCGGTTTTGTTGGGGTGCACATGACTAGGTGGAGTGGGAGTGTGTGTTCTTGATTTT  
TGTAAGTACAATTCTTACATTTGCCTTTGGCCATCTGGTAATCTCTGGAGCTAGTTGTTATAGTTTTCTCTGGTTAGA  
GCTTGTTCCTCAGGTGATTGTGTTAGCCTCTATCAGCAGACCTGGTAGACTACATCTCTCCTCTGAGTTTCAGTTGT  
CAGAGCACTCTCTGCAGGCAAGCTCTCCTCTCACGGGAAAGGTGCACAGATATATGGCCTAAAGACCTCCCTCCTG  
GCCGATGCAGAAGGCCAAAACAGGACCTGTCTGAAGCTGAGTTGCTTTGGCCTGTCCAGAAGGTGTTAGCTT  
CTGTATTCTACACTCTCACACGTCCAGAATACTCTGTGGAGTCTGGAACCAAGATGTCTGCAGCTGATGCTCA  
GGCAAAGCACTCCTGCACTGGGCAGACCCCTTCTCTGGCTGGGAAAGTGGCCAGATGTCTGAAGCCTGTGCAG  
AATACTCTCGGCTGGATCCCGAACCAAGATATCTGCTGCCGATGCTCACTCAAAGCAGTCCCGCACTGGTCAGAC  
CCCTTCTCTGGCCTGGACATTTGCCAGTTGTCTGGGCCCGAAAAGTGGGCTTTCTTAGAAGCTCTGTGGCTCCCA  
CCTCTCCAGAAGCTTTTGGCTTCTGTATTCCGTACTCTCACCTGTGCAGAATACACCCGGTGGGGTCTAGAACCA  
AGATGTCTGTTGCTGATGCTCAGGCAAAGCACTTCTGCACCAGGCAGAACCCCTTACTCTGGTTCGGAAAAGTGGC  
CGGATGTCTGGGGCCTTTCAGAAATACTTGGCAGGGACCTGGACCAGTCTTGTGCTTCTCAGAAAATTGACAT  
AGTACTACCAGAAGATCCAGCAACACTTCTCCTGGGCAAATACTCAGAAGATGTTCCGATGTGTAATAAGGATTCA  
TTCTCTATGATGTTACATACCAGCCTTATTTATTTATTTGTTAATATTTTTATTATTACGTATTTTCTCAATTACATTT  
AGAATGTACATTTAGAAAAGTCCCCATACCGTACCCCCACTTCCCTAACCACGCATTTCCATTTTTGTCTCTGGCA  
TTCCCTGTACTGTGGCATATAAAGTTTGCATATCCAACGGGCTCTCTTCCAGTGATGGCCTACTAGGCCATCTTT  
TGATACATATGCAGTCAAGAATCCGGGGTACTGGTTAGTTCATAATGTTATTGGACCTACAACGTTGCAGATCTCT  
TTAGCTCCTGGATACTTTCTCTAGCTCTTCCATTGAGAATCCTGTGCTCCATCCAATAGCTGACTTTGAGCATCTAC  
TTAAGTATTTGCTATGCCCCAGCCTTGTCTCACAAGAGACAGCTATATCTGGGTCTTTTCCAGAAAATCTTGCTAGT  
TTATGCAACGTTTTCATCGTTTGGAGGCTAATTATGGGATGGATCTCTGGACATGGCAGTCTCTAGATGGTCCATC  
CTTTTGTCTCAGCTCCAACTTTGTCTCTGTAACAGTCTGGCGTTCTCAGAAAATTGGACATGGTACTGCTAGAG  
GATCCACAATACCTCTCCTGGGCATATATCCAGAAGATGTCCCAACCAGGAAGAAGGAAACCTGCTCCACTATGT  
TCATAACAGCCTTATTTATAATAGCCAGAGGCTGGAATAAATCAGATGCCCTCAACATTGGAATGGATACAAAA  
AATGTGGTACATTTACACAGTGGAGTACTACTTAGCTATTAATAAATGAATTTATGAAATCCTAGGCAAATGGAT  
GGATGTGGAGGGCATCATCCTGAGTGAGGTAACACAATCAGAAAAGAACTCAAATGATATTTACACACTGATAAG  
TGGATATTAGCCCGAAACTTAGCATACCCGAGATATAAGATACAATTTGCAAAACACATGAAACTGAAGAATGA  
AGACCAAATTGTGGACACTTTGCCCTTCTTAGAATTGGAAGCAGTCACCAGCATTATTTATAATAGCCATTTGCTC  
GAAAGAACTCAGATGTTGCTCAACAGAAGAATATATGATACAGAATGGATACAGAAATTCTGGTACATTTAAACA  
ATGGAGTACTATTCAGCAGTAAAAACAATGAACCTTATGAATTTCTTAGGCAAAGCATGTATCTGGAGGATATCA  
TCCTGAGTATGGTAATCCAATCAGAAAAGAACACATATGATATGTAATACTTATAAATCAATATTAGCCCCCAAAC  
AGACTACTCAAGATACAATTTCCAAAACGCATGAAACTCGAGATGAAGGAAGACCAAAGTGTGGATACTTCATTG  
GTTCTTATAATGGGAACAAAATACCCATGGAAGGAGTTACAGAGACATTTTGGAGGTGAGAAAAAGAAACGCAC  
CATCCAGAGACTGCTCCACTGGTGATTATCCCATAGACAACCACCAAACCCAGACAATATTGCATATGCCAGCA  
AAATTTTTTACAGGACACTGGAATAGCTATCTCCTGTGAGGCTATGCCAGTTCCTGGCAAATACAGAATTGGATA  
CTCACAGTCATCTATTGGATGGTACACAAGGCCCTTAATGTGGAATCTAGAGAAAGTACCCAAGGAGCTAAAGGG  
TCTGCAACCTTAAAGGAGGATCAACAATATGGACTAACCCCTGAACTATGTATCTAGTTGCATATGTG

GCAGAGGATGGCCTAGTCAGCCATCAAAGAGAGGAGAGTCACTTGGTCTTGTGAAGATTATATACCCAAGTACAG  
GGGAATGCCAGGGCCAGGAAGCAGGAGTGGGTGAGTTGGCAAGCAGGGTAGGGGAAGGTATAGGAAACGTTT  
AGGATAGCATTGAAATGTAATGAAGAAAAATATCTAATAAAAAATGAGTAAAAATATTAGCAAAACCTTATAT  
TAGCACGTTAACAGCACATCTTAAAGATCTCAAACACAAAGAAGAAATGACACCCAAAAGATGTGGTGGCAGGAA  
ATAGTAAACTCAGGGTGGAAAAAATAGAAAGAAAAATACAAATAAATTTTTGAAACAAATATTGGTTCTTTG  
ACAAGATCACTAAGATAAACAACTATTATTCAAGTAACTAAAATAAAAAAGATAATATCCAAATTAGCAAAATC  
AGATATTAATGGGGGGACAGAACAACAGACACCTGATAGGTCAGAATGTTTCGCAAAGTGCTTCTCCTCCTAG  
AAGCACACTTGCTCAACCATATTAATTGCTGCTGTATTATAATTATCTGCAACTGGAAACAACCTACATGTCCATA  
AACTGAAGAATGTATAACATATATGTTATATTTATACAATGGAACATTACTCAGCTGTTATGAAATGGATGGAAAC  
AGAAAAAATAAAAAAACAACAACTAAAAACAACATAACCTGAATAACGTATCCCAGTCCCAGGAAGATA  
AATATGCTATGTATTGATTTATATGTTGATTAATACTGGGCTGGATAGTTTTTTGTCAACTTGTCAAAAGTAAAGT  
CCCCTGAGAGTAGGGAATCTCAATTGAGAAAATGTCTCCATAAGATTGGTCTGTGCAGGCAGGACTGCAGGGCAG  
TTTCTTTATTAATGATTGATGGGTAGGATTTCTGCCAATTGTTGATACTGCCATCCATGTGCTTGTGGTTCTGAGTTC  
TCTATGAGAAAGCATGAAACCATGGGGAACCTAACCACTAAGCAGAATGCTGCAGACACTCTGGGCCCTTTGTCT  
GCGTGGAACGGATCTCTAGTCACAGGTGGGCAAAGCGTTGGATGAAATGATAGACAGATACACAGAGGAGAGGT  
TGTGTAGAATCTGAATGTAATGTGTCAAATTGAGCATCAAACTTTTTATACAGAAGAGAATAGGAAAGTTGGGTG  
ACACACAAGCAAGGTACAAAGAGGTTACTGGATTCTTACAGAAAACGGAGGAATACAACTCAGAAGTTCTCACA  
GGAAACACCTGGGATAAAATTCAGTGTAAACAACCTGGGATCAAAAAGAGCTCCACCAAATATCCACATAATCTTAG  
AAGTCAGGGTCAAGGGCTTCGTGCCCTTGCTATAGTTCCTATTTAGTCTATTGTATAGACCACCTTCCCCTAGGC  
AATTGTAATAACGTGTGTATGGGTGGAACCTCAGCTATCTATAGTCTAAGTATGTAAGTCTGCTTCTCCTTAGGTCT  
CAAACCTTCTTCTCCTAGATGATGATAAATTCTGTGTAGGGCAGTGACTTAGCTTTTATTCAAAGTGGTAGTATA  
ATACCAGAGGCAATTCTGAATGCCACTGAATAGACAACATTCTTACTGAATTCTAAGCCATGGTCAGCTCAAGGA  
CTTTCTAGGATATTGGAACACTGGCAAAAGCTTAGCTATATCAGAATTCAATCTTAAAAAGAACTTATAATAAGATA  
ACACTAAAAGAGAGCATGTGGATCCATACACCAGACTAACCGGGGAATAGGGGATGAGTATATGGGTTAATGAG  
AAGGCCAAAACCTCAGAAGGTGAGCTTCCGTGAAACTCTTGCCTCATGAGTGCTTCCAGGCCTCTCGGCCTGTCA  
AGCTGACTCGACTGGTGTGCGTGGCAGCAGTACCCATCCATGGTCTCTGTATTAGCTCCTGCCTCTAGGTACCTGG  
CCCATTTAGTTCCTGTTCTGTCTGCTTTCAGATGATGAATAGCAATGAAGAAGTGTAACCAAATAAGTCTACCC  
TCCCAACTTGTGCTTGGGTTATAGTTTTTGGTGACAGCAATACAAAGATTAACACATTCTACATTACATATGTGAT  
GGCCTGTCTACAATCTGTAGATCCAGTGAAGTTAGGTATAGAGGAAGGACTTGGGTGCATACATTGATGCCCATG  
GTATGGGGATATAGAATGGATTTTATTAGTGGACAAAGGTGGACAAGAAAGAGAAGATCAGGTGGCATAGGGG  
AGGGAGATGGGGTTGAATAAGGAAATGCAGGAAGAGATATTTGAAAGAGAAGTATTTGATGAATGATGACCGAA  
AGGTGTAGGAACCTGGAGAGGATGGGAGGTAGTGAAGAACCCTGGGGAGTAAAATTTGGGGGGACTGTAAGCA  
GGGTCTATTAATGAGAAGTTAATATTATTTTTAATTTTACTAGAATATTAAGCATGGCAGAGGGGCTCCCAGGAA  
TGTACATTTTACCTCCAAAATACTGGGCTTTCATGGATTCTTGGTAAGGTGAACCACTAAAAGCTCTTACCACTCTT  
AAACACTTAAAAGCTGGTACCCTCTGTTACCCTCATGCTGTTGTAGAGTTTCTCTACTTGTGCCCTCAAATCA  
CATCCCTCATAATCTATGGATTGTATGAAAATTTAAGGTGGGTTCCAGCCCCTCACTGGGCAATATCATTGCCACCC  
ACAGTGTTAGTTAGATCTAACTTTCTCAAGGATTGCAGCTGATGAAGATTAATACTTCAACCACGATCTTGAAAG  
AATTACTACGAAAAGCATGCCTTTTTTTTTTCAAATTCAGGCTGGTGTTCAGATGATTATTTCTTTGTACCTAT  
TTCCTCCATCTGATTCTGATATGATATAAGAAAAACATGGTTAATGTACAGATGTGCACCTGAGGATTCAAAGT  
AGAAAGGGATGATAGGTTTTTACATAAAAGTTTGTGTTTGTGATTCTTTAAGATTTTTGAAGGATTAATTTTTGAG  
ATAGATAAAAACTAATCCTTTATGTATAACAGCAATTTCACTACCAGTAAGAGAACTGGCTGAAAAAATAC  
CTTACTTGCTTACAAGTTGTTAATCTATAACAAGTTTTTTAGTTAGAAATGTGTGTTGGTTCTTGGGGATAATATTG

GATATTTATAAACATAATTTATAAATAGCTCATCATAAAAAGTATAGTGAGAAGATTCTTTTCCTTATATATTCTCATA  
ATTATTCACTAGAAGAAAATAGAAAAGTAACCAGTATAAATTTTATACTAATTGAAAGATTGTGCAGAGATATATAA  
GCAGTGTGAGGAAAATAAAGTTGGTGCTTTGTTCTATCCACCAATGTGAGTATATATGGAAAAGTGGTTGAAGCTT  
TGCAGTGTCCAACAAATGTGTGTGTGTGTGTGTGTGTGTGTGTGTGTGTGTGTGTGTGTGTGTGTGTGTGTGTGTGATTGTTTGTG  
CTTCTTAAAGCTTGCTTCTTACCATGTATGTAAATGTGTCTTGCTGCTTTATATGCCATCTAACCAACATCCCCTC  
CTTGAATCATTGAACACTCTATCACAGCTACTCTTGAAAGGCAAACAGACAGCAAACACACAGAACCCTACTGGG  
CCTAACTTGAACATGTATGAGACCACCCACCTCTTCCAGTGACACCCTTCTCCAACAAGGAAAACACCTAGTCCAAC  
AAGGTTACTCATCCGAATACAGCCTATGGGCCGATGGGAACCAATTACATTAATAACTACCACACCTACCTAGCTAC  
ATGCATACATATATTCCTGCATAAGAGATAAACAGAGAAAGAGGGTGAGAGAAATAGAAAAGAGAAAGAGTGATT  
GGTAGATGATAGAGAAATAGTTGCATACATATCTATATAAATACATTCAATCATTACTTCATACATACATACATA  
TACATACATACATACATACATACATACATATATAGATGATGGATAGACAGATAATGATATGTGATATTAATCT  
AAACACTAAAGACATGGTGCCCTTAACTCACACACACACACCCTGAGCATTGTTTACAATCCTCAATTAAGACATA  
AAGGTTGGACATTCGAACTACAAAGACATATAAAAAACAAATCCACAAAACCTACAATGTTTCAATTTGGTGTGCATAG  
ATTTGATTAATATCTAGGATTTTCTTTTTGTGTATATTATGAGAGATTACACCCTAAAATCTTTCTCAAACCTGTCCA  
TTATTTTAGTTACTACCGTGTACAACCTGATACTTATAATCCACTAGATAGTAACGTTACAGAAGGTATTTATTGTGC  
TGAAGATATTCAGTCATACCCCTCAGCTCCAAAATATATCTTTTAAAGACACATAGTAAGGAACGATCTTCAAATG  
ACCTGAAATGAACTGTACCTGGTGGAAAATAACACAGCACAGGAAGAAGTTTACACATAAAATTTATATTCATG  
TGAATATTGGTCAAATGATTCCAATTGTAAAGTTGAATTACATAGTGGTATGTCTTTGAAACAATAGGAAAAAAT  
GATGTGCATACATTGTGTTTTCCAAAAAGAGTAGGAAATGTAAACATTTAAGCAGTGGCATGTTGGTTTTCTAATG  
CCAGGAGATGACTAACATAGCAACAGACTAATAATGTATCCTCTTCAAAGTTAAAAGAAAACAGCAACAACAAG  
AAGAGAACAACAATCACAAGGAACCATGTCATCCGTGGCATCTTTAGGAGGATGTGCAGCACTCTGAACATGGTT  
CCAAGGACTTTAGTAGATGTCTATTGCGTTGTCAGCCTGACAAGTTTGTGTTCAACCATCCATGTCTGTATACTAAG  
GTTGGGAACAATCCATCGGTGATGAGTGACCTAAAGATGATGAGTTCTACTCCCCACTCTCCTTGCTGCTCTGGAG  
ACTTCAAACCTGAGGGGAGGAATGTTATATTGATGAGTATGAGAATGCTCAAATCCTTTTTGTCTACATTGTGTAA  
ATGTGGCATCTCTTTAAGTGAAGTGTAAAGACCTGCTTGGCCAGAAGGTACAACCAGAGGCCTGTTGAATAAAGAT  
GCTACTATAGAGACCCCATGTAATGAGAAAGGTCTTTCTGAAGTACCCTTGACAGAGGTGGAATTTAAGATCCAA  
TTATTCAAAATGGCATGTAGGCACTACTGTAGGCCTTATTGTCACACCGAGAACATCCCCAACACTAATCAGAGA  
TGTATGGCTAGTGGTCAGAGGTGAGTGGGTAATGGACATTGGGAAGAAATGAGACCCTATGAGCCATGAAAAAT  
AGATAGGACCCCAATGGTCAGAGGGGAAATACACGAGGGCATCTTTGTGAGAATTTGGAATCTAAAACCCCTTT  
GTACAGGTAACTAGTATGTTGGTTGGGTAGAGTTTAAATTTGCATGTTCTTTCCTTGACATGAGCTCAAAGACTCA  
GCCTACCTCATGCAGTGGAGCCATTCCAGGTACTTCTTACAGCTAGCAACTCCTCATCAGAGACTAGAGCATCT  
GTCCACTGTAGTAAATGTGGTGCCGGATCAGGAAGCAGTCTGAGCACTACCAAAAACCTGGCTGACAATTCCAC  
ACTAGTTCTTCTCAGGCATATGTTCTTCTCCTGGGTCTAGGTATGAATCGTGAGGAATACATCATTTTTAGTTTTCT  
GCATTGAGGAAATGAGGTTTTGTTCTGGGCTGTACTTCTAATGTTCCGGCTCAGGTAATTTAAGCTTGGGTGGTCT  
GGAGGTCCATTTGGGAGTTAAAATTAGAGGAGGGGGTACTAAGTGTCTCCATCAGAGGAGAACATTGCAAGGT  
CATTATTGGTCAGAAAGGCATATTTGATGACCACTTGGGGAAAATGAGATCTGAGGCCCTGGTAACTCAGAGTC  
AGTAGATTGAAATCTTTTTGGTCAAAGCAGAAGGATCTGAAGCCCAATTAATAGACTTAGTAAGTTTACTCCCAC  
AGGGGCATATTTAGAATGTCTGAGAACCCTTTGGATATTGGTGGACGGTAGCTCTTATTAGAACAGGGAGGGCT  
GGTATATCTTTTGGTGAAGAGTGAATATTTAGGTATAGTCTAAAAGCAAATTCAGTAAAAAGACAGTAATTGGA  
ATACTTTGGGCAAGGAGAGACATATGCAGTATCCCTATGTGCAGGAGAAGAATTGTTTCTGCCCGTCTCAGGATTG  
GTGATAGATCTAAGATTCTCTAAAATAGGAGGATGGTGTAGGAGCTTCATAGGATTGTATAGAATAATTTTGTCC  
TGTTATTCCTATGTCTGAAGCACTATTGATCAGAAATTGAACACTGATTGATACCTTGAGAATTCTAGGACATTCCA

GGTACTTACTCCTTCATCAGCTCCAAACATGAAATCACAATCAAGAATACACATCATCTGAATGTCAGTGGTAGGC  
ATGACAACAATCTTAGAAGTCTTTAAGAGGGTGAATGTAGTATTTCTGGTTAGTGTCTTCCTTAAATATATGT  
CCATCCACACATTCTCTGCATGGAGGCCAGGATGTCTCTCTAAGGTAACAAAACAAAGATAGTAACTGATTT  
ACCCTTACCTTGATACTCTTCTGTTGGGATTTAGTCCAGAGTGTTCAGAAATCTCTTAGGTCAGAACAGTGTTC  
CAGACCACGGAAATTAGAAGTTATACGTAGGACATACTGGGAAGATGGAGAATCTGGGGGATTTCTCAAACA  
CACTGTGCTCCACAGAGGTTGGAGCACTCTCTGTTGTGAATGTCTAAATATTCCTAAAGTAAGATAGGGGAGGAG  
CTTGGGCAGTTTTGCACAGAAGTAGGATGGTTGTGCCCTTCATCAAAGAGGTAATGTGGCAAACCTTCATGAGAAT  
AAGGAAGTTGAAGCATTCTGGTCATAAGCAGCATTCTGTGACACTTTGCAAGTGTGAAATTCTAAACCTACTTGT  
AAGAAGTGTAAAATCTCTGGCTATTTTCAATAAATAAGAAATACCATTTACATTGGTGAAAATGCAAATACCTTCT  
GGAGAAGAGGGAGTCCCAGTATTGCTTGATCTGCTTACAAATCTTTTTGTAGAATTTAGGATATCCACATATTTA  
TGTAAGTGTGTGAAAGCAGGCAGCAATTGTTTCAGTATTCCAACAGGTTGGATGGTTATCTTTGGTCTATGAAACT  
TTTAGTCAGATGACATAAGAGCAAGGCCACTTTTCTGAATGAAGGAATGTCTCCGAATATTTGTAACAGGAAGAA  
GTTTGGAAAGTAATCTTAGACAGTTGTAATATAGCAGGCACACATAGTCAATAAGACAAGATCTATTTACACTTTAC  
AAGAGAGGGTAGGTATGTGTCCACCACTGAAAAAAAAAAGGAAATATTTAGTCCAATATGGGCATTCGAGAAGG  
CTTTGTTGCCAATAGACACAGGGAGAAGAGGAAATATTTAGTACTAGATGTGGTGTGTCTGAGGCTCCCATAGG  
GAGAGGGAGAGGCACTGAAGCCCTGGTATGACTGGATGACATTTATAGACCTCTTCGACAGAGGATGTGAATTTG  
AGAACCACTGGAACAAAAGAGTCATTCTGGTGCCCTTTCAAATGAGGAGTTCGATGTGAGACACAGTTAAATG  
GAAATTTTTGCCCTCCATCAGATAGAGAATTGTTTGAATTTCTTCTGATCAGAGAGGGTAATTATTGAAGACCTTT  
TGGACTGGAAGTGAAGTTTGGGGCTGGGGCAGGTAGAGATGATCTCAGGCCTGTGAGGCTTACAAGACAGATA  
TTGGACCCTCATGTATACAGAGGGTACATTTGATATATAATGGACACAAATTAGTGGTCTAAGTATTGATGTAGAA  
GATTAAGCAGAATTAGAGTCTGCTAATGTCCCAACCTCTTAGGGTTAAGGAAGTACCTAGCCTACCTTAAG  
CAGGAGAGGTAGGACTGCTTCACACTTAGAAGATTTCCATCTTACATACACCTTGTAAGCCTGGCAGCAATAC  
AAGTATTATGCACCAGGCATGACTGTAAGTCTCTAAGCACTCTGAAGCTTATATGGGTGTTTTCATGACGGATGG  
TACGAAGGATAGATGACCTAAGTTTCAGGCTCTGTTAATGCAGGGCAGAATTAAGTGAAGTATAATTTCTAGAG  
ACCATCCTTGAGGGAAATGATCTAAAGCTCATGATTGGAGTGTATATTTGAGGCTCATATGTATGTAAGGATGC  
TCTTAGGATACCTGGATTTTTGGTACCCTTGGGAAAAATGAAATTCTGAGATTCCAATAGTAACTCCAGTCATAAT  
TATAACTGACCTTGGGCAGAAATGGAAGGTTTTGGGTATTGTTGGTAACAGCAGTAGGTCATGAAGGCCACCTAT  
CCCAAGTGAATTTCTGATGACCCTTCATCAAAGGTGATGGTATGAGATACCTTGAAAACAGGTTGAGTAGCATGT  
GTTTCATGCCTACAACCTTCTATGACCTTCCGGACCCATTTTGTAAAAAGAAAGAACTGGGGCTGGAGAGATGAT  
TCAGTGGTTAAGAACAAGTACGGCTCTCCAGGGCTCTGAGTTCACAAACATCTGTAATGGTATCCAGTGCCGTC  
TTCTAATGTGCAGGCACACATGCATAGAGAACACTGTATATATAATAAATAACTAAATACTTAAAAAGAAAGGAA  
CAAATGAATGAAGGAAGGATGGAAGGAAGGAAGGAAAGAAAGAAAGAAAGAAAGAAAGAAAGAAAGAAAGAA  
AAGAAGGAAGGAAGAAAGAAAGAAATGAAAGAAAGAAAGAAAGAAAGAAAGAAAGAAAGAAAGAAAGAAAGAA  
GAAAGGAGAGGAAGAGAATGAAGGAGGGAGAGAGAGAGAAAGAGAGAGATAGAAAGAAAGAGACAGAAA  
GCAAGAGAGAGAAAAAAAAGATTGAAAGAAGGAAGGAAAGAGAAAGAAAGAAAGAAAGAAAGAAAGAAAGAAAGAA  
AAGAAAGAAAGAAAGAAAGAAAGAAAGAAAGAAAGAAAGAAAGAAAGAAAGAAAGAAAGAAAGAAAGAAAGAAAG  
GAAGGAAGAAAGGAAGGAAGAGGGAGGGAAAGAAAGTAAGAAAGAAAGAAAGTAAGAAAGAGAGAGAGAACG  
AAAGAAAAGAAAGGAAGGAAGGAAGGGAGAAAGAGAGAGAGAGAGAGAGAGAGAGAGAGAGAGAGAGAGAGAGAG  
AGAGAGAGAGAGAGAGAGAGAGAGAGAGAGAGAGAGAGAGAAAGTAAGTTAGTTAGTTTCAGGCCATGATTAACC  
AAGTAGCAGGGTCAAGTCAACCATTTGTGCAAAAGGGAAAAATCTAGTTTATCTTGGGTAGAGGGAGAACAGAA  
TGGTAGTCATAGTTTGTCTTCCATCTAGTCTCCCCACCTTCCATTATCCATATATTGTATATACTGTTGGGAAGAATA  
CAAGGAACAATCAGCACACTTCCAACAGGGAGAGTGGCTGTCTGACCTGAGGTTGTATTTGTCTGTACCTATCT



ATAAGTGAGAGACAGGAACACACCATTTCTGACATCTAACTCTAGGAAGATCACATGCATATTAGTTTTCTTTCTAT  
GTTCTGCCCTCTGCCCTACACTCAGAAACATGTGAGAGCCCACTGTGAAGTTGCAATTGTGTTTGCCTTGCAATCAT  
TCTAATAGAGAGTGGCACTGAGGTAATATGAGTTTAAAGTCAAGTTTAAAGGTGCCCTTGAAAGAATACTCTGGG  
CATCCCAAGAGGCTATATCTGAAACTCCTATGACTACAGGTATAATAAATGAAACCCTCTTGGCCATAGGATCCAA  
ACCTGAGGTCTCTGTCATCATTGCTCCATGACACATACACCCTTGGCAAGCAATTAGATGTCTATGTTCCCTTGAGGT  
TGAAGGAGGTAATTATAGCCCCCTTTGTAACAATGAACTGCATGTGAGTGGACATCATTCTACCTTTTTCAGTG  
GGAATGGCATAAAGCTTACTTAGTCTGGGGCATCTTTTTTAATTAGATATTTTCTTTAATTACATTTCAAATATTAT  
CTACTTTCTAGATTGCCTTCTGAAAATCTCCTATGCCTTCTCCCTCACCCCGCTCCCAACCTACCTACTCCTGCTTC  
CTGGCCCTGGCATTGCTATAATGGGGAATAGAGCCTTCACAGGACCAAGGCCCTCTTCCCATTGATGACCTC  
CTAGGCCATCCTATGCTACACTTGTGGTTAGAGCCACAAGTCCACCATGTGTTTTCTTTGATTGGTGGCATAGTTC  
CAAGGAGCTCTGGGGGAGGGGTACTAGTTAGTTCATATTGATGTTCCCTTCTATGGGGCTTCAGTCCCTTTCATGTC  
CCTGGGTATTTCTCTGGCTCCTTATTGAGGACCTTATGCTCTGTCCAATGGATGACTGTGAGCATCCACTTTTTGTAT  
TTGGCAGGCAGTGGTTTGGGACATCTTTTGTCAAGAGATATGACTGAGTCCCACTTTCAACGAAACTGAAAGTT  
TGAGGGTATTTCTACTAAATGAGTACTTTAGACAATCTTGGGCAAACAGAGAAGGTCTGCAGAAGGCTTAGTCAT  
AGGAGGAATGTCTGACATTCTCTCAGTAAAAACAAAACAAAACAAAGAAGTCTGAGGTAAGTGGGAAAGAGAGG  
AAGTACTGGGCACTTAGGAGTAAGAAAAATAATGAGACCTGGTTGGTACAATGGTATGCATTAGAAAAACCTTGG  
AGAGGGGGTAAGTGCCATGCAACATCCTGTTATGTATGAATGTCCCTTTAACTTGATTAGTAAAGGAAGTCCCTC  
CACTGCTCTTCAGCTTCAAATCTTCTTAGTTGGTAAAAGTTTCACATCCTGTGTTTAGTCTGAGGGAGTTCAGAG  
AACATTCGAAGCCTTTTCAAGCAGCCTGGATGTCTGTCCCTGGCTAGGTTGCCGCCTTCAGTTTGTCTTAATATGTA  
CATATATAGGCAACAACAATTCAATTGGATTGCAAAGCATAACATAGGATCCATTCAATAATTCTCTATATATAT  
ATATGAATGACCTGGGACCACAACAGAGAAAAACAATATATTTCCCTGTGCATCCTTATAAAAGGGAAAGGCTT  
GAATCTTACTTAATTAGAGAATATACATTTGATATAGTTCAAAGTCATAAGTGAATGCTTGAGGATACAAGGCATC  
ATGCACTACTATTCAAAGAGCATATCTAATAGCATTTTAGGAATAAAGAATAGTGGGACCTTCCTTTGGTCAAAC  
ACAGTGGTTAATGCCCCCTTCCCTTGAGAAATGGACAAGATCCAAGGCCATATTTTGGGGGAAGGAAAAGACTG  
AGCCTCACTCAGCCTCACCCAGGTTAGTTCTCTGGCTACTTCAAAAAACAAGGAGTGTGAGAGGAATCCTGGGAA  
CATAGGAGTTATGAGAACCTCTTCTCAGAATGGTAAGTTCCAAGACCACCTTCAACAGAGAAAAAATCGTGAATGT  
CTTAGTTCTAAAGTAGAGGTCCCAGTCATATTTTGCAGGTCAGAAATATCCAGTTCACCCATGGTCAACAGGGT  
AAGTTTCTAGGCTTCACTGGGTAAGTGGAGGAATGTTGAGACTCTGCCTCACTAGCTTCCAAGTATTTCCCCATATG  
CATACCCTGTGTAACATCTTTGAGAGTCCAGTCAGTGGTCCACAACAATCTCCAGCATAAGTAGTTATGCAAGCATT  
GATGTTTCTCGAGGCTGTGTTGAGCTGCACACATCTGTGAATAAGAGATAGGAATGGTGCATTTTGTGACCATT  
TTTGAAGCACAGGATATGAGAGCCAATTTAGATTTCTATTTTCTGTCCCTATGATCTAAAAGGATAGAAAATGTGA  
GGTGTCAATTGGTCGTGTATGTATTGTATGGATATGTTAAAAGCAAAGTCTAGTTAATAGGGGTATTTGCGAGGCACA  
GCCAGAAGAGAATCTCTGGTGGTTCAATAATTGCACAGATGGACCTGAAGTGTCTAGTACAGAGAGTAGATGTA  
TGAAACACCCCTTTGACACAGGAGCTAGTTCTGAGAGCCCTTTCAATAGTCTTTGATTTCCAGGACCCCTTTGTA  
GAAACTGAAGTTCTAAAATCCACTTGGTGAATTGAAGTAGACAATAGGCCAGATTCTACTGGGAAGACAGGGA  
ATGTTAGATTCTTTTTATGTAGAATGAGTGGTATAAGTCTTATGGTCTGACATCCCTTTAAGGAAAAATGATTC  
AAAGCTACTTGGTAGGATTAGGAATATTCCTTATAAGGCATGATACATGTTTTAGGCGACATTTGACCAATAGGTT  
CTAAGGCAATGTTAGCCCTAGGAGAGTTCTGACATTCTATTCAGTGTAGTGAGAAAAAATGAGTTACCATGGGG  
AAATGTGGGCCCATGTAAAAGAGGAAATCTCGAAGGCCCTACTGAAAGAGGAGGGCAGACTCCTCTTGAGGCA  
GAATGTGAAACTGCCATATACACCTCTGTCAAAAAGTAATGGTCTCTGGTACATTATAGAGTGGAGAATGTTTCCAG  
GCATGATCATAAGTTTCAATTCTTATTCAGAGTTTGTATTTTCATAGTTTGTGTTTCAATTCAGAAGAGACATGGCAG  
CAACATATTTTTTTTTCTTCAAAGGCTTTCAATGACTGTTGCTGGCTAGTATACTTCTTCGACTTTGTTTCTATCC

AGGTCTAGGCAGAATTAATGAAGTTATTACATTTCTATTGACTTGCCTAAAGGCAGATGGCACAGGTA CTTTGCTC  
TGATTTGTAACCTGGACTATGGGACCTCAAACCAGAATGGTCTAGGGTACATTGTTTACAGAAGGAGTCACTTTTG  
GAAATATGGCTGACCAGCTAGGTATAAACTACTTTGAAGTATACATTCACATATATACTTCATATATTTGAATGAC  
ATTTTTGAGAAAGAGAACGTGTTGGGTGGATAAGGAAGAGAAGGAAGGTCACAGAATCCCTCAGACAAAAGTTT  
ACCTTGGGAATTGGAAGATGTCAAAAATACTTATCAAGTGCAAATGTCCTCATAGTCCAGAATACCCATGTGTTT  
TGAGACTTTGAGTTTTGCTTGCCAACAATCAGAGCAGTTTTCTTTCAAATTGTTTGGTAAACTCTAGCTCTATGTTCT  
CCATAAGCTGTACAGCAGCATCCCAGGCATAGGCACCAAAAATGGAATTGATCCATTTCAAGTGACAGGCTTAAAAT  
TAAAAATTAGATTAGCATTATATAATTACTGTCATGTCCAGGACATCATTTAGAGTGTTTGGCATCCCTTCTTTT  
ATTTGAGCATGCCTGGCCATCCAGGTCTGAAGGGAACTTTAGGACCTCCTAGAGGAATAGACCTCATGGTTCTAT  
GGATAAAAGTGGATTTTCTGAGGTAAGCATAGTCAAGAGAAGTTGATTTAAAGTTTCCTTGAGGAAAAAAATAA  
AAAAGAACATTGGCTTGAGTTTTTTCATGTCAGTGGCTTTTCTGTAGGCTCCATAAGCAGCAGAATTTGTATTAATCC  
CCGGTCAAATTTAAGGGTGAGTCTATATTTCCCTAATTCAAAGATAAAAATCAAAGATTCTTCCTTGACAGGGTATCT  
ATGTCAAAGATTCTTCATTGAAACCTTTTTGAATCTAGAGTTTACCTTGAAGTGAAGGAAAAGTCTCAGAAACATTA  
GGAAAAACATCTAAGGTTTCAAGTCCATAATATCAGCAAGCTCTGTGGGATTCTCAACCTAAATGTATGTCCAAGCC  
TGCTTTGGACAACTGGTATGATCTGAGGCTCCCTTTGCTTCAGTGGGAATATGTGATGCCTCCTTAAGTAAAGGT  
AGAAGGAATGAGTAGCCCTGGGGAGAAAGGAGTTGCTGATATCCTTGTAACAGGAGAGATGATCAGAGTATAAA  
ATTCCCCATAATATTTGAGCAAAAATTAATTGCTTACCTTAGCTCATGAGGTCCTAGCATTGCCACAACCTTCTGAC  
AGTTCTTCACAGCCTGGGGTATCCATATCCTTAGCTGAATTAGCAAGGCACCAATATAGATACCATGATTCATGA  
AAAGCTTCGGATTGTATCCTCAGCATGATTGCCTCCTAAGAATTATGTTCAACCAACCAGAAGTGAAGTATAATGAT  
GATTTACACAATGTATGTACTATACTCAAGAAAGTGGCATAAGGTTCCAGAATTTGCCTCCTCCTTGTATTTT  
TGTGAACTTTGAGCAGAGGGAGCAATTTCTCCTTGGTCAGAGGTAATAATATCCCATGGGTTCTGAACGGAAGGGA  
TTTTTATGATTGCCATTGCATCAAAGGTGTACATTTTATGACCTTGATCATCACAGGAAGGAAAATACTATAGGTT  
TGGAAAGTAGAAAGTCCCTCAACCCTGTTGGACAGTAGGGGAGTTGCCCTGTTACCTTCTGTAGAGGAGTTTGT  
CCAGGCACTCCAGGCCTCCACATCTTCAGAGAACTTAAAAAATCTTATCTCTTAGGACTCCATGAAGATTTGACA  
GCAATCTGAGGTTTCTTCTGACAAGTTGGCTCAAAGTCCCTGGATTTGTTGTCTATTAACCTTACAACAAAGCACAC  
AGGTGTGGGTGTAGTGTACAGTTACCTTTCTGATGACCAGCTTAAAGAGAGCCTTGAATCCAGGCTGAGGTTTTTA  
TACATTGGCCATGGGACTTGACTCTGGAGTTCTGTGAGGTTTGTGTTGTTGTTGTTGTTTGGTGGTCAAAG  
TGTATCCCTAAACAATAAGTTCTGAGGGAGAAGCTCTTAGTTGAGTGGTAGACCTGATTCCACCATGAACAAAGA  
CTGAAACTCTTGTGATTCTTGGTACCAAGATTGAGCCTGAAGCACACTAGAGCTGAGCCTGAATATTTGAGATA  
AACTTCTCACTCACAAGGTCAGTTCTATACCTTGCTTCATCAGAGAGGCATGTCTCAGACCTTCCAGTGCAGAAGG  
AGGAAGAATAAAGAGTTTTACTCAAGGTGAGCTGACCCCTTTGGCACACACATAATGTCAGGGGATACTATGATTA  
GAGGAAGCAAGGTTTAGGTGCTCTTCAAAGATAAACCAACTGGGTGTCAGCCCCCTTGAAGTTATGGGATACTT  
TACATCTGAGGGGGCCTGACGTGATGGAGTTGATATTTATGCTGGAGGTATAAATTATCCTGGGTCTAGAAGGGT  
ACATCTGAGTCCCATTGTAACCTCATCAATGCTATTGCATGCTGATAGTAAAAGAGCCAACTCTGTGGCTTTCTTA  
AAATGTTGTTGGGTCTGTTGATAAGTCCTTTGCTTATCATGTATGATCAGGGCATCTTCAGTTATTGAGGAC  
CTATGTGACACCTTTGTTCTGAAGTGGTAATTCTGAGGGAAATTAACGAAATTCTGAGGTTTCTGGTTCTCATATGA  
TAATGCTGCCTTCAATACTGGGGAGTTTCTAACATATTTGATTTGGGGGTTACATCTGAATCCCCCTTGAAGTTATT  
GGTGTAAAGTTGTGAGTACATAGGTTCTATTTTCATGTATGTGGGTATACTGTCAATTGTCTTCAGACACACCATAAGG  
TGGCATCAGGTCATGACAGATGGTTGTGGTACAACAAGTGATTGCTGAGAATTGAACTCAGGACCTGTGGAAG  
AGAAGTCAGTGCTTTTAACTGCTGAGCCATCTCTCCAGCCCCAGCACATTGGTTCTAGACAGGTAAGATGAAGGTC  
ACTTAGGCTATTGGGGATGATCTGAGGATCCCTGGTTCAGAATGGGCATATCAGAAGTTCCCTTGGTCCATACAGT  
AGTTTGAAGATCTGTGGTTCTTAAGCTGTAGGTCTGAACCTTACCAGAGAAGAATGCCTGGAGTGTTTTTGAATT

CCTAATTTAGACAAAGTGTACCTGATGACTCCTTGAGCCACTGAGAGTGATTTAAGCTCCACTTCAAGCATGGGGG  
GACAGTGTGAGTCTTCTTGGTGCTGAAGGGATAATTCTGAGGTTTGTGTGTCAGAAACAGGACTTGGAGGCCA  
TTGACAGAGTGATAATGTTGATGTATCCACAAACAATCTATAAAGGATGCCATCCTTTAGAGGCAGAAAGTTTAC  
ACCATGTTGGGGAAAGTAGAAATGCCAAAGACTATTGTATCTGTACAAGATCAAGGGTCGATGTGGAGAGGAGA  
GAAGGCCTGAATATTTTCATGATTGAGACTTCTGGGAAGCTAGAACACACAAATCATGCAGGCCATGCAACAGCTT  
AATCAATCTCCAGTGTGCTAGGAGACATTTCCAGCTAGTTCTCCTGATAAATCTGCTGCCTACTTCTAAAAATGGC  
AAGGCTTTCTCATTTTTGCTGGTCAGCTTAATGTCTATGTCCTGGGTTCAATTAACGTGCTGGCTACTCTAAGCTCTG  
AGACTTCAGGAACCCGGTCTGATCCTTGGACAGGGTAATTAGGTCAGAGGATCAGAATAAGAAGCACTTGGT  
GCACCTTAGATCAAGGGAGTGGATTTTTTCATGGACTAGATCAGATCTAGTAGGTAGGTCTAGGTCCTCAATGTTCA  
GGAGAATCACATAACTCTCCATGAGGTGAAAATTATATAGCACATTCTTCTGGATACAATTGTGAGCTAATCTTA  
ATCAGAAAGGGGATTCTTGCCTGCTTTAGTCACAGGGGCATAGATGAGGCTTCAATGTGCATCTGAGGCAGCT  
AGGAGTGGAAATTGTAAGTTTGTATACAGTTGATGAAAAGAAAAGTTCTAAATTCATGTTGTTTCATAAGGGGC  
ATAGAAAGGGAAAATATGAGGGCAGCTTCTGTATCAAAAAGAACTGAAAATGCCAGAGTAAGAGAGAGTAGG  
GCCAGGCCACCCTCTTCAAATGGACTGCCTACAGGTTCCGTTTGGCAGGCTGGGGAGCTCTGGTGTGTCCCTG  
GGCAGAAGGAGGAAGTCAGAAGCAAGGAGTAAGTCGTAAGCCTCTAGAGCATTTCGATATCTCTTTTGTGATA  
AAAAGCACCGGTGAGGCCAGTTTCTTAGATGGAGCATTGAGGGGCCACCTATTTAGCCTGAAGCATTCTGAG  
CCTTTCTGAAACAGGGATCACAAAGCCAGTGTCCCTTGGTGAGAACTGGAAAAGTCTGAGTCCACATTGGTCTGAT  
TGAGAAGGTCCGACACCTCCTTAGGGAAGAGGAAAGAACTACAACCTCCCTTTTGCAGTGCATCCTGTTGAGAT  
TGATTTTCAAATGATGTGTATATTTGTGGCCTCTAGGTCACAAAGGGGGAAACCCAAATTCATATTGTAATGATGG  
GTCTCTCCAAGAACAGGAGAGAGCAGGTACCACATCCTCTGCTTGGATATTGTATGTTTGTGATATCTTCGCATAA  
CAGGGAATGTTCCAAAAGGGGAATGTGGTACTCCCTTTTGGAGGTATGAATGCCATAGGATAGGCACAAAAGCTA  
TGGGCTCCCGTTTGGCACTTCTGGAAGTTTTCTCTCCCTCTTGGACATTAGGAATATGTTTTGAGTCTCCTTAGTAG  
AAAAAGAAAGGCTGATATCCTCTTGGGGTGTATGATGAGTGTGCACACCTCTATGGGGACTGTCTCCATCTGGAG  
ATGACTCAATGCATTCTTGTATCTGTAGGGGAAGCTTGCAGGGCTCCTTGGGTAACATAGGCTTTCTCTGTTTTCT  
TTGGTAGAAGTAGCGTGTCTGGGAATCTCATGAGGAAGGTGGGATGCCTGAGGCTGTCTTCATGAGAAAGAGTG  
GTTTCGATGCACACTTCTGTAAGGATGGAGGATGGCTTATCAACCTCATGCTCTGAATTGGAAGCTTTGGTGTCCC  
ATTGGTCAGAAGGGGCTTTTTCTGATGGGGTTTTCAGTAGACTTAGATGGTCTGTGAATGCCTTGGCTTGGTAGGG  
GACTTCTGAGGCCACCTCATGAGATGGTGTAGCATCTGCAGGCTCCTTTAGCAGAATCAGAAGTGGTGAAGTTTAT  
GTTAGTCATAGTTTTAAGCTTTACACCTCTTTCTAAATTTGCAAACCTTACCCAAATTTTGGAAAGAATGGCAGTGT  
TTCCAGCCCGCAAGTTTTGAGCGCACATATTTAGGCCCTCTTGTATCTACAGAGGAAGGGCTTGGTCTTGTCTTCT  
CAATTTAGAAGGTGTGGGGCAATCTCCTGGAAGAGGAGAATGACTGAGAACTTTTTTACAAAGAATACTAGATCT  
GAAACTCAATTGAGATGATTTTAAGGAGGAGATGCTGCTTTGAGGAGTAGAGGTAGGACTGGATTCTTTTTCTGC  
ATACTTGAAGATGTGAGGCTACTTACGGCAGAAGAGATACATTTAAGGCAACAAGTTCTGAAAGGCAGTATCT  
GATATCCCTTTCAGGAATTGGGACATGTTTCAATATCCTTTGGTTAAATTTCAAACGTCTAGGGTCTTTTTGAGATA  
AGAGAAATTTCTCCATCCATCTTACGAGGAGGGGTAGGAATAATGTCCCTTCTGCACAAAGGGACAGTCCCTGA  
AACTCTGTTGAAGAGGAAGTATCGACGGTTTCTTGGTGTAGATGTCACAGGTTTTAGAGGCCCTGGGCAGGTTGA  
GAAAGTTCTAGACTTTCTGGGAAATGCTGGTGTCTCAGGATCCCTTGTTCAGATACTAAAGGGCCAGAGCAC  
CTTCATTGGGTTTCAAAGACACAGAGACCCTAACACAGATGCCAAAGCTTCTGGAGTCCCTGGCACAGATTCTGA  
ACCCTTAGAAATGGATTGTGTATATGTCAGAGGTTCTTCTGTCTCTGGGCTAAGTGGTGAAGGAGCTGGTAATTTG  
GGAGAATCTTGTGTGGTTGACAAAGATTCTATGACCTCTTGGGTGACAGATGGTATTTCTGTAATTTTTGCATACA  
TGCCCATATTTCTAGTGTCTCCTGGGAAGAATCAGAAAAGTCCAAGATCTTCCAGGATTGGATGGTAAATATCCTAAA  
GCCTCCTTTTCCAACAGTGTCTGGAGGCTCTTGGGTAACATGGAAGTTTCTGTAAGCCCTTGGGAAGATATTG

ATGTTTCTAGTACACCTTGGGCAGACATGGAAGGTCTCCAAGACATTAAGACAGAATGTTACTCTTTCAAATCCAA  
TTGGACAGATGGAGAAGGTCTAGACTCACTATGGTAGATGCTGAAATTTCAAAGCTCGTGATGAAGCATTGGA  
TATTCCTGGATTGCCATGTGTACAGGTACAAACTTCCAGGTTCCCTATAAAGACAGCCAAGGGCCTCCAGCTTCTT  
GAACAGATGACAAATGTCCTGGATTCCCTGAGCAGATAGGGACAATGTCAAAGGCTCTAGGGCAGATGATATAG  
ATCCTAGTGTTCTCAATCAGATAAAGAAATTACCATGGGTCCTTTGGAAGAATGCATAGATCCTGAAGGATCTGA  
AGCAGATGGATCTGTTTGTGAACCCCTGTAGAGAATTCAAAGACTCATTGGTCCCTGGAATGAAGTTAAAGGT  
CCCTCTGTAGGTTTGTAGAGAGGTCAAAGGCTCTTCTGTGGAAAGGGAAGATCCAAAAGGCTTAGGGAAGAAAGT  
GAGGAACTAAGTTGGGCAGAAAATGCAAGTTCAGAGGTGAGTCATTGGATATCACATGTCCTGGGGTAGCTGTT  
GAAAATTTTTGTGTTCTCATGCAAATGATGAATATCCTAGAGCCCCATGGGGAGGCAGCAATGTTTCTACAGAG  
CCTGTGATTTGCTGAAATCCTCAGAGATCCCTGGTCAGATCTCAAAATCCTTGCTGTATTTGAGCAGGGTGGTTA  
TATCCCTGACACACTGGTAAAGATGGTGAGTCTGCTACTGTGTAGTGTGTAGATGTGGAGTGAGTTCCTATACCTT  
GTGTATGTAAAGAAGGACTTGAAAACCTTATGGAAGATGTAGAATGTTGGGTAGACCTTTGTGGACATGTGGACA  
GATGTATGGTCCCCTTGTGCAGAGACTGGGACTCACACCTCCTTGAGCAGAATCAGAAGATCCTGGAGTCCTTGT  
TCTGAGGATGAAAGACCCAGAGGATTATGAGAACATTCATAGCATTGTGATGTATTCATCATTGCCTGGGCTGAG  
ATAGAAAGTTTCAGAGGCCCGGGGAGATTGCAAAGGTGCTAGATACCCTTGACCAAATGGGAAAGTCTTTGCA  
CCTCCTGGTCAGAACAGGAATGTCTACCAGGTGTTGGCGATGATGGTGGCAATGTTCTAGATTTGCTGAAGTAG  
ACTGGGAAGATGCTACAGCCTGCCTCACTGTGAAAAAGGCCATAAAGCACTGTGTGACTCTTCATATTGTGCAA  
TATCCCTGTGGCATCTGTTGAATTTTCTGATTTCTTTGTTGGGGAAAAATGAACTTTCATGAGCAAAGTTCCTC  
TTGTGCCCTGGAAAATTTCTGTGCTTTTAAAAAGATGACAAAGCTTCTAGAACCCTTGAGTAGATAACAAGATGT  
TCCTGAACACCCAGTACTGATGGTGTAGGATAAAAGGTTTCTTGAGATTTCTGGCTAGGTAGGAAAGTTCGAGTGT  
CCCTGGGAAACCTGGGGATCTTTGTGCAAATGATGGGCAGTTGGAGAAAATCCTACTTCTGTCTGACAAGAAG  
TTGGAGGATGCAAAGTATCTTGAGCAAATGAAACACTTTGTGTATTCCCCTGTTTAAAATTGGGCTTTTAGATACC  
TTGGGAAAAATAGAAATGTCCGAAAGCCTCTTGAAAGATGAAGAACCTAGGGTTCCTTGTGAAGATAAACAAAT  
TCCCAGAGACATCTGCTCAGATGACACAGATTCTGGTCGCACCTGAGTATTTGGGTAGACCCAGATGTCCTGGA  
GTGGGAAGCAAAGCTCCACAGTCTCCTTGCAGACAGGGACTTTCCTACTGTGGCTTGTGCAGATAAAAAAATCC  
CCTCAGTGCCTGAGCAGATGTGGAAGACCTAGAGTTGTTTCTTTAGATTTAGTCACTTCTAGATGGCATTCTTCA  
GTTGAACAAGGTCTAGAGTTCCTTGCTCAGATCTCAAAGATGATGGTGACAACCTGTAGTGATGTAGTAAGATCCA  
GGGCAGTTCAGCACATCTGAAAGTGTCTGAAGTCCCTTGGGTAGATGGAGAACATTCATTTGTTTCTGAAACTGT  
TGGGGAAGGAGTTGAATGCAGTAGAGCCCTCAGCATATCCAGAATATGGGTGATTGCCTGGGCTGAGCTTGAA  
AGTGTGAGAGGCCCTGGGCTGATTGCAAATGTGCTAGGGTCCCAGGACTAGATGGGAATGTTTCTGCACCTCCTT  
GAGTAAAAGATGAATGTGTACCAGGTTCTCAAGGTGATGGTAGCAAAGGTCCTAGAGTAGACAAAGCATATGTA  
GAAGATTCAGAAATCTCCCTCACTAGAGGCAAAGGGCCCGAGGTAGTCTCTGTGTGATTACATTGCCCAAGCCCA  
ATATTCCTGAGGAATCTGCCGAAGGTTCTAGATTCCTTCGGGTGGATGACAAAGAACTTAGCACAGGCAAAGTCC  
CCTCTGCAGCTGTGGAAAAGTCTTACACTTTTGTAGAGGTTAGCACATATCCTTGAGAGTCTTTACTAGATAGAGG  
ATGCTCCTGAGAACCTAGTACAGATGATGAATGTGTTACATATGCTGGTGAATATGGAATGGATTTTTGAGATTT  
TGGCTAGGTAGGAATGGCCCAAATTCCTTGAGGAAAAGTTGGGATCTTTGTCTAGAAGGTTGAGAAAGGGGAGA  
AAATCTCATACTTTCTGGCAATAAGTTGGATGTTGCACAGTCTTTGGAGAAAATGGCACAGTTTTTACTCCTT  
GCTTAGTTGTGGACAGTTTTAGAGACCCTTGGTCAGAAAGGGAATTTCCAGAAGCCTCTATGGAAGATGAAGAGC  
TTAGAGTTCCTGGTAAAGAGGAAGAAATCCCAGAGGCTTCTGATCAGATGGAAAAGACTCTGAGACACCCGAG  
TGATTTGGGTGGACCCTAAAGGTCCTGGAGTGGGAGGCAAAGTTCCTACTGTCTACCTGACAGACATGGACTTCC  
TGTTTTGGCTTGTGCCAATAAGGAATGACCCCTAGTGCCTGAGCAGATGCATAAAACCTACAGTTGTTTCTTAG  
ATTTAGTCCCTCAGGTATGCAAGGTCCCAGAGATCCTTGCTCAGATCTCAAAGATGATGGTGACACCTGTAATAA

TGTAGTATGATCCAGGTGCAGTTCAGCACATCTGGAAGTGTCTGAAGTCCCTCAGGTAGAAGGAGAATATTCATTT  
GTTTCTGAAACTGCTGGGGAAGGAGCTGAATGCAGTAGAGCCCCTTCAGCAGATCCAGAGATATGAGTCATTGCC  
TGGGCTGAGATGGAATGTGTACAGAGCCCCCTGGGATGATTGCAAATGTGCTAGGTTCCCGGGACTAGATGGGAA  
TGTTTCTGCACCTCCTTGAGTAAAATATGAATGTGTACCAGGTTCTCGAGGTGATGGTGGCAAAGGTCTAGGGTA  
GGCAAAGCATATTTAGAAGATTCAGTATTCTCCCTCACTAGAGGCAAAGGACCCGAGGTAGTCTCTGTGTGTTTAC  
ATTGTCCCATGAGCAATATCCCTGTGGAATCTACGGAAGGTTCTAGATTCCTTTGTGTGGATGACAAAGAACTTTG  
CACAGGCAAAATCCCCTCTGCAGCTGTGAAAAGTCCCTTACACTTTTCAGAGGATAGCACATATCCTTGAGAGTCT  
TTACTAGATAGAGGATGCTCCTGAGATCCTAGTACAGATGGTGTAGTGATTCCCATCTGCTGGTGAATATGAAATGG  
ATTTTTGAGATTTCTGGCTAGGTAGTAACGGCCCAATATCCCTTGAGGAAGCTGGGGATCTTTGTCCAGAAGGTTT  
AGAAAGCGGAGAAAACCTCATACATTTCTGGCAATAAGTTGGATGTTGCACAGTCTTTGGAGAAGACGGCACAGT  
TTGTACACTCCCTTGCCTAGTTGTGGACAGATTTAAAGACGCTTGGTCAGAAAGGCAATGTCCAGAAGGCTCTATG  
GAAGAAGAAGAGCCTAGAGTTCCTGGTGAAGAGGAAGAAATCCAGAGGCTTCTGATCAGATCCGAGTGATTT  
GGGTGGACCCTAAAGTCTCTGGAGTGGGAGGCAAAGTCCACAGACTGCTTTCAGACATTGGCTTTCTACTG  
TGGCTTGTGCAGATAAGGAATGCCCCCTAGTACCCTGAGCAGATGCAGAAAACCCCTACAGTTGTTTCCTTAGATTT  
AGTTGCTTTAGATGAGAAAGGTCCCACAGTTCCTTGCTCAGATCTCAAAGATGATGGGGACACCTCTAGTGATGTA  
GTAATATTCAGGTGCAGTCCAGCATATCTGGGAGTGTCTGAAGTCCCTTGGGTAGATGGAGAAAAAAAATACAGC  
AACTCATTATCATCTTTACTTTGTGCTTGCAGGCTGGTTGCAATTATCTTGTAAAGCATTAAAAATCAGTCTAACATA  
CTGCCTATGTTCCATAGGGTTTTATTGATGTGAGGAGACATCATGACTCAGGCAACTCTTATAAGGAAAATTTAAA  
TGAGGTTGTCTTACAGTTTCAGAGGGTCACTACATTATTATCTTGGTAGGAAGCATGGCAGCACCCCGGTAGAGG  
AGGTGCTGGGGAAGGAACTAAGTGGTCTATATCTTAGTCTGAAGGCTACCAGAAGGAAGCTTGTGGCCACAGGT  
AGCAAGGAAGAGGATTGATTTTTGTCTCTGAGCAGAGATTGAGCACTACACATAAGCAAGCCTACACAATGATAC  
ACTTCTCTAACAAAGCCAACACCTTGAATAATGCCACATAACCATGGGCAAAGATATTCTAATCAACACACTGCGT  
CATAGGACATAAAGAAAGATACTGCATGATTGCATTCTCTAGTCACAGGTGCGACATACTACAAGCTTATATGA  
ACACACACACACACCAATCGGATATGCACATGCATACATATATATTTGTCTATTTATTTACTTACTTACTTACTT  
ACTTACTTACTTACTTACTTACTTTGTTTTAAATTTGTTGGGTAAGAAGTTTCTACATACACATAAATGAGTTTTAGCA  
AATTCATCCCTATCTTCTCCTCCTTGAATTGTTACCCATTTCTCCTGTATCACTTTTATCCTTAATTACATTTTTCATTTTT  
ATATAGACGGCTGTGTAGTGCCATGCCCTGAGAAATCGCGTGCATGCCGCAAGCAATCACTGAGAAGAGCCGTGC  
GTGCCACAAGCATTGCGCATTATAAGATGGTGTAGTGGCCTCCCCTGTGCCTAACTAGTAAACAAGCCTTGTACGCAG  
GTGCAAGAGTGAACCTCACTCCTAGTCACTGTCCATTCTCGGGGCATAATAGTGGGGTGTAGGGCAAGCAACGAAT  
CAGGAGCTGTCACGTACATCAGGTGCTGAAACGTCATGCTGTTGGCTATATAAGCAGCGCCATTTCCCGGATCA  
TGGTCTTCTGATAAGTAAGCAATAAATCTTTGCCACAGAAGATTCCGGTTTGTGCTTCTTTCTTGCCGGTGCAG  
TGGGATGCAATAAGTGGCACCCGAGGAACCCGGGAAGTTTATACCATCACACCAGTGAAGGAAGATCCCTTGTTT  
GCGGGGCGGAATCAGAACTGCGGGATGAAAGGCTCTGTAAGGTACATACAGTTTTGAAATTTCTCCAGAGTTAGA  
CACCTTTTGATTGTTTGCACAGCGATTGCACTTTTCTTTTTCAGTTTCGTTTTTCTTCCACTGCTTCCACTGCTGACTG  
GTTCTTAGTCACGGTCAAGCCTGGATAGCGCCTGGACAGCGACCAGTTTCAGTCACGGTCAAGGACTGGACAGTGC  
CTGGACAGCGTCCATTTTCAGTCACAGTCAGGACTGTACAGCGGCAGTATGAGAATCTCGCATTCTATAATAGTGG  
CCTTACACTCGGTCTGAAGCACTGTGGCCTAAAATGTGCCACTAATACCTTAGAGGGATTTGTCAGGGAGATAGA  
CAATGTGGCACCATGGTATGCTTGGCTTAGGGTCAATTAGGCCTTTTCATGGGCCTTGATCCCGAGGAAAAGATATA  
AAAAGAAAAGAATGCCTTGGGAGAGATTAGAAAAGGGATGGAAGGGAGAGAAGAAGCGAGATCCAGCTGGA  
GAGGCACATAAGGAAAGGAGCCTCTACCTGCCACTAGATGAGTTTAAGCAGCTAGCTCTTAGTAGCTCAGAATCT  
GATGAAGGGCTTAGCTCCTCTGAAGAAACGGACTTGGAGGAGGAAGCAGTTCATTATAAGGGAGAAAAGGTACCT  
GCAAGATAAAAATGCAAGCTACTCAGTGCAGAAAAAGTCCAACAACGACTGGTGAAGCCAGCTTGCTGCTCGGCC









CTGTTTGGTTCTGAACAGTGACGATCAGTTGCAGTGTGGCCTTGCTCATTAAATATTCAAAAAATTAAGAGTAAAGA  
GTACCATGGAGATGTCCACTCTCAGTGTTAAGGGTAAGAGCCTCATCGACTCACCTTTCTTTTGTAAAGGTAAGT  
TTAACAGTGTGGTGGGCACGTTCCACAATGCCTTGTCCCTGTATGGCAAACCAGTTAAATAAGTTACATTCCTCTG  
TAGACAGAATTGTTGAAAATTTGAGAGGTGTAGGCCAGTCCATTATCGGTTCTAAGAAAATTTGGTTTGTCCCCGA  
GCTTCAAGGCAATGTTGAATTACATGTGTGGCTTTTTCTTAGTAGAGGGATCAGTTTTACTGCCCTTTTTCTCTCTC  
CCCTTCCTTCTGAATCCCTGGGAGGGCCCTTTTTCTTAGACATGTCTTTCTTTTTCAAGCTCCAATTCTCTCATTCTG  
TTAGTTTTCTGACATACTGTCCTGAACCTCTTCTAGTATTCCTGTCCCTCCACATTGGCTGTTTGGCAGGTTTCATC  
CTCTAGACAGTTTTATATTAGCTTGCAAATGCCTTGGTGCCAGGCGTAAGTCTCCCTCTTATGCTTAAGGTCAAG  
GTCACCTCCTAGCTTACTACATAAGGCTACAGTTAGAGACCCCGAACAAAGAATACCAGGGAGAAAATGCGATCCACT  
TCCTTAACAAAGTTCTGCAGCGTACTGGAGGCAACCTGCCTGTAATGCAGTGATCACTGACTTTGAGGAGGCCATG  
ATAGAGTGAGTCCCTGCTCTTGATCTACACCCATTTATAGTACTCCTTAAGCAAAGCGAAAAGTAAACACAGTGCTC  
TGCTCCCTTATCTACGGAAGGCTTAGAAGATACCTCAGTGTTGCCACTTATCTACGTCGGACTGACAACACCTCATT  
TTTCAGCACCGCCTCGATGGACAGAATAAGAAACAGAATGAGGGCCAGGGCAACCAAGACTAGAGCTTCTACTG  
CCCCTTCCTAGGGTGCATCTAGATTAAGACCGAAATCAATAGGGATAAGAGGGTCACGATGAGACATAACCACTCC  
AAACTTACCTTTCCCTGCAGTTTTGAATCCACCCATCTCCAGGGGTTCTCCTCAATGCCAGCGATGTTGATCCTGG  
GTTTATGGCACCGGATGACCTGCGCTACCATCTGCCAGCAAGAAAACATGCAGGACACTCAGATCTTTCTGCAGT  
AAAGCTTAAATACATCTCCAGAGATAGATGAACAGCTTCAAGACAGGAGACCCAGAGAGCAGAAAACCCCTCCCT  
TATATAGGTTGCAAAGTATGGTTAGAAATACGGTTGGAGACGTGAATCACCGAATTGTCTGCCACCATCAGCCT  
GATGACGCCATTGGAGAGGCAGGGCTCAGGTAATGGAAATATACCTGACGCCTGAGCGTACTCACCATGAGCAA  
TGGTGACAATGGTGTGTCAGTGCCATCTTGTATTGGTGACCGTGAGGGCGGCTCCTCACAGTGGTAGAAGTAAT  
TACAGGGTTTTCTCTGATCCTGATTTGAATTTGGTACCTGATATCTGTCTAAATAAGTGTCCATTTTATCCAGATTTT  
AAGTTTTGTTGAGTACAGCCTTGAATAGTAGGATCTGATGATATTTAAAATTTACTAAATTTCTGGTGTTATTTCTCC  
CTTTTCATTTCTGATTTTGCTAAATTGGATACTGTTCTTGTGTTCTGTATTTAGTCTGTCTAATGGTTTATCTATCTTGT  
TGATTTTCTCAAAGAACAAGCTCCCAGTTTGTTTGATTATTTTGTATTGTTCCCTTTGTTTCCACTTGGATGATTTAG  
CACTGAGTTTGATTATTTCTGACTTCAACTCCTTTTGGGTGAATTTGCTTCTTTTGTCTATAGTGTTAAGGTGTG  
ATGTCAACCTACTCCTATATCCTCTCTCCGTTTTTTTTAGAGGCATTAGAGAGAGCTATGAGTGTCCCTCTTAGGG  
CTATTTTCATTGTGTTCCATAACTTGCAGTATGTTGTAGCTACATTTTCATTAACCTCTGAAAAGTCTTTAATTTAGTT  
CTATATTTCTCCTTACTGTTTGTACTGACTAGATTGTTGTACACATTCCACGTGTATGTGGGTTTTCAATTATTT  
ATATTATTGTTGAAGTTAGTCTGTGGTGATCTGATAGGAAGCAGGAAATTTTCAATAATTTTATATCTGTTGAGG  
CATGTGGTGTGACTGAGTGTATGGTCAATTTTGGAGAAGGCATCGTGAAGTCTTGAGAAGAAGGGACATTTCGTTT  
GTTTTAGGATAAAATGTTCTATAGATATCAACTAAACGTATTTGCTTATAAATTCTACAAGTTTACCCTGTATCTT  
TTTAGTTTTAGTTTCCAGGATCTGTCCATTAATGAGGGAGGGGTGTTGAAGTCTTCCAATATTATTGTGTGTGGTAC  
AATGTGAGTTTTGAGCTTTACTAAAGTTTCTTTTATGAATGTGGATGTCATTGCATTTGGAGTATAAATGTTTAGAT  
TTGGGAGTCCATCTTGGTAAATATTAACTTAATGAATATGACGTTTCCCGCCTTGCTATTTTAACTTTTGGTT  
GAAAGTCAATTTTATTTGATATTAGAATGGCTGCTCCACCTTATTTCTCGGATCATTGCTTGAAAGTTCTTTTCC  
AGCCTTTTAGTCTGAGGTAATGTTTACTTTGTCCTTGGTGTGTTTTTGGTATGCTGAATATTGCTTACACATCCA  
TTTTTTTATTCTATGCCTTTTACTGGTGAACCTGAGTCCACTGATATTAAGAGATACTAAGAAAAGTCTTGTGCTT  
CCTGTTATTTTGTATTAGAGTTGGAATTTGTTTCATGTAGCTATCTTCTTTAGGTTTCTTCAACTTTAATTTCTC  
TTTTTTCTGAGTGAATTTCCCTCTTTATATTGAAATTGTCCCTTATTATCGTTTGTGCTGGATGCATTGGAAG  
ATATTGTGTAATATTGTTTTGTCACAGAATACCTTGTTTTCCAAGCTATGTTAAAAGAGTTTTGCTTCATATAGTA  
GTCTTGGCTGGCATTCTGCTCTTACATTCTGTATGACATCTGCCCTAGATTTTCTCCTTTCATAGTCTCAGGGGA  
GAAGTTATGTGTAATCCTGATAGATCTTGTCTTATATATTACTTGACAATTTCCCTTACTGCTTTTAAATTTCTTCT

TTGTTTTGTGCATTTGGTGTGTTTACTATTATATGATGGCAGAAATTATTTTTTTTCCGGTCCAAATAATTTGGCGTT  
CTGTAGTCTCCTTGTATTATCATGAGCATATCTTTCTTTAAGTTAGGGAATTTTTTTTTCTATAATATTGGTAAAAATA  
TTCAATAGGCCTATAATTTGGAAACCTTACTTCTCATCTATACCTATGCCGGATTCATGTACGTAATTATGTCATTT  
CTAAAAGCTGTTTCAAAAATTCACCTGGGCAGTATTTCTGAGAAATTCAAATCATTAACTTTATCAACTTTTACT  
AATATAGCATATTATGTTTCCATTTTTTTGTCTATATAGTACAGAGCCCATCATTTGACAAAGATGAGAATATACCAC  
CTCAGGTAGAAACAGATGAAGATACGGTGTAAATTTTTCATTTTTTCCATTTTGATAGAGTACTTCAACAGTAGTG  
TTTGTGAAACCTTAACTGGAGAAGTAGATTACAGGAAAAAGAGCAATTCAGGGTCAGATGCTCTTATATGTGTAGTT  
CAAGACCAGATTGTGGTCTTTAGACCTTGTGATCACGACAATATAGCAACTAGTACAATAACAACCTGCATGA  
GATGTTCCAGATATACACACAAAGAAAAAGAGAACCATTATAAAAAAAGAGAAGGACCATTTACGAAGAAGAA  
GGATCTCAGCAATGGTAGTACAGTTATGAAGAAGTGTGTGAGGTGTAATGTATGAATTGTTTAAAGTAAATATT  
AGAAGTTTTTTTTTGGAAATTCTACCATGTATTGTATATGGATATGACATTTGATTCAAACCAAATATTATATATTTA  
TTAAAAATAATTAATAATTTTTCTGTGTAAAGTTTTGTGTGTGGTAGAAAAATGTCCTATGGTGAGACTCCA  
TAAAGTGTATCTCGCAGGAAGGTAATCCCCTAGACGTTCCCAAGCTTGTTTTCCCTGATCTCTGAAAATACAGCT  
AGGAAGAAGCTCTTTGTTCTCTATAGCCAGCAAAAAGGCTTTTTGTTTCTATACTTTTCAACCAGAGATGCCTGCCT  
TCCTGTGCCAAGGACAAGGTGATAAAAATTTAGAAAGGACTCACGCCCCACTCCTGCCTTGAAAATTTCAACAAGA  
ACACTAGGAAGAGAGGAACTCCCCTACAAACATTTCCAACCTCCTCCAACCTCCTCCAACCTCCTCCAATTCCTC  
AGTAGCTGTTAAAAGCCCCCTACTGTACAGCTCGGTGTCAAACCTCCCCGCCCCTGCTAGGCAGAGTGACTTTGTC  
CTCAGCCAGCTAATAGTAAAAACTCTTGCAGTTTGCCTCAGTTGTGGTTTTCTTTGGGTCAATTGGGGTGTGGCC  
AGCTCATTCCAGGACTTGAGAGGAGGCCAGCTTCTGAGGTCTTACATTTGGGGGCTTCTCCACCATGATTTGTGG  
CCTACCCCAATTCTCAGAGACCCTGCTTGGAGGTAGGATTCTATCTTTGTCTGTATCTTTGTCTCTATCTTTTTCTATA  
ACTTTCTCTATCTTTGTCTCTATCTTTTTGTGCCAGCTCTGTTGAATTCATCTATTCTCCGTTTGCAGTTGTAAATGCT  
CGTGAGAGCAACGAACTCCCTTTTTCAGATGGAAAAGGGTACTGACAGACATGTCAGGAGAAACCGGCTGCCAC  
CCTTTGGGACATCCCAGGAGTTCTGAGGGAGTTCCAGGGATACCTGGAGATCTCCTATCAGTGTGCCAAGTGAGA  
GTGTGCTCACTCGGCTGTCTGTTTCTGTTACTGGGTGCCAAGTGAGTGTGTGATCTCTCGGCCATCTTATTGGGGCC  
TGGTCTTGTTATTGTAATCTTTTTGTGTATATATTTTTTCCCTGTATGTGACTCTGATGATGGGACCGACTATTAA  
CATGCCCTTGACTGACCTTGATCACTCGACTGAAATTAAGACTAACACTCACATTCTCTCTGTGTATGTCTGAA  
ATAGATTTTAGAGAACTTTCTGATCTACAGAATGGCCATCTTTGATGATAGTTGGCCACTAGAGGGCACTCTTTGTT  
TGGTTCTGTTTTAGCTCTTAAAGTTGTTTTACAGAGGGGACCAGGGTCTCAGCTAGATTACGTGCCCTACATTCTC  
ATCTAGAAAAATTTAGCACAGGATCCCCCTCTCCATCCTGTTTAAAGCCTTGGGTTAAAAAGAATAATCCAGGCT  
CCCCAGTCTGGCCCTCTGCCACCCAGAGGTGAAAAAAAAGTTAAACTGGCACAGGTTGAACTGCAGCCCTCGG  
TTTCTCCAAGATCTATCCAGAGTTAGAAGAACCTCAAAAATGGCATAGCACCCACCCCATATTCCCTACTGGTC  
CCCTCCAAGAACTCTCAACAGGGTGCCACTAGATATTTGGGGAGGGACCAGTTGCTAAAGCCCAAGGCCAGCGAG  
CTCGAAGCCCAGAGTGACCAGATTCAACCATTGCACTGCATTTATGTACTTATGACCCTCTTCCAGCAGGCCCCAGA  
CAACTGCTGACCCTTCAAGTAATGGCCCTTTTTCTCCTCTGAACGCTATAACTGGAAGGCAAAATCACACCTCCCTTCTT  
TGAAAACCTCTAGCCTCCTAATCTAATGGAATCTCTCATATTCTCTCTTCCAGCCTACTTGGGATGACTGTCAGCAG  
CTACAGATTCTTACCACAGAAGAGAAGGAGAGGATTCTGAGAGGAAAGAAAGAGCATGCTGGGGGCCAATTG  
ACTACCATAAACTTCTAAATGAAATGGATGCAGCCTTCCCTCTGACATGTCCTGACAGGACTGACCATATGGAG  
CAATTTACAATTTCTGCTGGGCTCTGATAATAGGACTGAAAGGAGCTGGCAGGGGCCCAATTTGGCCAAG  
GTAAGAGAGATCCTACAAGAGAAAAAGGAGCCCCAGCAGTGTTTTTAGAATACCTCTGAAAGGTATAGAGGTGT  
TACACTACCTTTGACCCTACTTCGGCGTGCCAGCAGGTGACAGGTGTCATGGCTTCAATTGGGCAGTATCCTTCTG  
ACATTAGGAAAGGGTTACAGCGTCTAGAGAGTCCGAAAATATTATCTTTACAACATCTGTTTAAAGGAGTCAGAGAA  
AGTGTACCATAAGAGAGAGAGAGACAAGCCAGCACCAGGGTATATTGTGCTCTGAGTCTGCAGACATGCTTAAACG

TCCCCAAAACCCTCAATAGGATCATAATACCTCTGGTGAATGGAACACAACCTCTGCTCCAATCCAATCTCACAGG  
ATCTGAGACTGCATTAATTAGGGAAGCAGAAAAATTGCCTGACAATGGTCACAAGTCCCTCTGGTCTGTGCCAG  
CACCTGGGCAACTTGTTGGACGGAGTCTGAGGACATCCCCAAGGTCTCACAGAAACATCCACGAGATCTTAAGA  
CCTTTGTGAATGGAAAACCACTTCTGCTCCAATCCTATCATGCAGGACCTGAGACTGCATTCATTAGGGAAGCAGA  
TAAACCGGCTGACCAGGGTACAAGTCCCTCCAATCCATTACAGCACCGGGCACCTTGGGGGCAGAGTCTGTG  
GACACCCCAAAGGTCCCCACAGGACTCTCCATGGGATCTTAGTACCTCTAGTGAGTGGATTACAACATCTGCCAGG  
AGAAAGGTTCGAACACCAGATATCTGGGACCCTTCTCTGCAAGAGGAGATCTTGCCTGCAGAGAGTACTCTGAAC  
ACTGAAACTCAGGAGAAAAGTCTCCGAGGTCTGCTGATAGAGGCTAACATAATCACCTGACCATTGTTATGGC  
AACTATTAGAAAACAAAGCATTTAATTGGAGGCTTTGTTACATTTTCAGAAGATTGGTCAATCATCACGTGAGGTA  
CCCCATCACTGGAGCAATAGAGAACTATTGATCCTTAGGCAAAAAGAGAGATTAAGCCATTGTATTGGCTTCTTGA  
AAACTCAAACCTCATCCTTGTTGACACACCTATCCTCCAATGAAGCCACACCTTCTCGTATTCTTCTAATCTTTAACT  
CACTGCCACTTCTGGTAATGAAATATTCATATATATGTGTCTATAGGGGATTTATTATTCAAACCACCACTTTTCCC  
ATGGCTCGATCAGCTATTTTTTTTTAAATATAACCTAAAGGGCTCCCATTTATTAAGGACTACTTATGAGCTTAGCCA  
CAGTGATGGGCCCTCCACATCAATCATTAGACTAGAAAATAACCCATAGACTTACCTAATGACTAAGTGATTGGA  
GACAGATGTTCAATTGTTCTCTCTCTCAGGTAAGTGTAGATTGTCAAGATTGGGAAAAAATAATGTTCCATCACA  
GTAATGTTAACTTACTCCATAACCTACACAAACATTACTCAACACCATCTATTGCATTCTGCCCTGCATAGACACT  
TTCCATGTATGGCATAAGTGAAGGGTGACTACCTCCATCAGCAAGGATACTCAATAATATGTGCCATGAACTGAAT  
ATTTCTATAGCCTACAACCCCCACATTCTACTGTGTGTACACTTATTGGGGGACTTGCTAATCTGTCCAATATCC  
TGCCACCAAAGCTATGACAAAAAAAATCCTCATCAGGAAATCCAATGAATTTTACCTGATTTCTTTCTCCTGAGGC  
AAATGAGAGTTATCCCTTAATGCTTATATTAGTGTCTGATTATCTGTAATAAACCCACTACTATTAACAGCTACATC  
ACAGGAGGTATGACAAATACCATCTCCATGAGTTGGCCAAGCCTTTTTCAGCAGCTTTTTTGAAGTATCCTTTCTAT  
ACTAAAAAATCCATTGATTCCTTTATTTTTAAGTGTGTAATTTAATGATTTTAAACATTTTACCTCCGTTCCATTTT  
CCCATCATTTTCTGCTACTTTCATATGATATTGCAATCTATTAATAATAGTAGTGAATACAGTGAAAGGACCAGTGT  
ATGAAGCAGCAAATTTCTTTATTTCTCAGACAACAGATACACTGCCAGAATCTTCCAGGTACAAGTGTGGTAACT  
TTGTGTCTAATGTTAGCATGATTCTCCAGAAAAAGCTTAAAGAATTAACCATGGTACTCTGCACCAGACAAGT  
CAGTATCACTAGTGAAAAACATTCATGTAAATCATTTTTCATTACTGTTACAATGTGCCTTAGCAGCAAGGAAAACAG  
GTCCATGGTCACAAGAGTATGAAAGAGGCATCAAGGAGCACAGTTGTCCAATTATTAGCAGCCAGTAAGCATCA  
ACACAGGAAGCGACCAAAGACAATAAATACCTTCCAAGACATGTTCCAATGACCATGTTCTTTACAAGTGCCTC  
ACCCCTTCCATGCACACCCATCAATCAATTAACTCATTGATTAAGCCCTCAGGGTCCAATCACTTTTTCAGATTGTGT  
ATATTGTTCTACCTTTGAACATTGTACTTCGGAACAAAATCTTCATCAAAGACCCACGACTGACATTGCAAACCCAT  
TTCACCACAGAATCTTTATGTTACAAAATGTGATGGAATGTATCTGTCTCTTTAAGGGTATCTCTGTCTAGAAGTT  
ACAAAAGCAGAACGTCCAGGCCAACAGAATCATCAACTCCATGAGCTTTTTTTTTTTTTTAAATATGAGATCAAGAAG  
AAGGAAAATGCAATGCAAGTTAAGGGTCTTGATCCCTATCCATCCAGCTTAATGCCATAGGGTGGACCCAGAAG  
TTTAGGTCAAAGTGTAATTTACCTATACTACAAACAACCTGTGATGATTTCTAGCCATCTCCAGTTTTCAGTGTGG  
TATTTAGTCCCACCATCTACATCAAGGCATATTGCCTAATGTGAAATAATGCCAGCCGTTTATTGCAAAAACCACTA  
TGTGTTGACTTGATGTAAGGAGACATCTATAATATAGACAGACTTGTACACACACATACTCACAGAAAGAG  
GCAAGAAGTAGAGGAGCTGAGTCTTAGGATCATGTGAATCATGAAGGATTTGTTTTACATTACCAACAAGAAGGA  
TCCAGCTCTCTATGCTTATCAGCTCCTGGATGACTACAAGGAAGGTAACCTCTACATGATTCCAGACACTCTCCGG  
CTGAGGAGAGATCAGGAGATGACAGTGTGTTGATAGGTAAGTGGATGCAGTACACCAGAAAAGATGGTTCC  
AAAAAGTTCGGAAAGGTTGTTTACCAATTTCTAGCCAATCCTTCCATGTAATTTATCAAGTTTTCATGGTGACATCCA  
TATCTATGTCTATACTATGGTGCCAAAGATTCTTGAAGTTGAAAAATCATAAAGTACAGAAACGTAACATATAGG  
ACTGGAAGAAAAAAGTTTTTTTTTACTGTGTTAGCTACATAAGGGTCTTTGACAATCCCAGTATCTTTGCCAAT

AAAATGTGTTTTGTTCTAAAAATGTAAATGTGTGACATGACATGCTGTAAGTGAACAATTTGCTGGAAGAGATGGC  
CTACAGTGGGAAGGAACATCAAATGAAGATGAAAGTTTCATTTAGGCGGTGAACAGTACATACACCTAAAATCAT  
ACATGCTAAAAGGAACAGCTTCTCTGGTCTGCATGCAGAATAAGGAATTGGAGATGGAACCTGGAGGAGCAGGG  
ATGGCAGAAAAAGATGGATGTTTAGGAAGTAGGGGAGAAGGACAGGACATAGTTAGAACCTCTGATGTGAAGAC  
TGAAGGAGAAACAAAAATTTGGGTAAAGTGGGAGATTTAAAGAAAATGTGGCCTTGTGCACAAGGTGAAACCC  
AGAAAATGATTGAAATAGACTCAGAAATCAGAGAAAATCAGGTTTTCTTTGAATAATGACACTTAAAGAAACCTG  
TCTCACATTTAAGATTTATTATCTTTACTTATGTGGGTGGGGATATGGCATGTGCTTTTGTAGTACAGGTGAACACA  
GAGACATGCGTTGTCAGGTCCTCTGGAGCTGCCATTAAGGTGATTATTTGCCATTGGATATGAAATCAAGAAACC  
AAATCCATTTTTCTGTGGTGCAAAAGTGCTTGTACCATTGATTCATCTCTAATCCCACAAAGATATCTTTTTTAA  
GAAATCCAAAATTCACATGCATAAAACAGACCAGATTCAAGATAAGAAAAGTTCTATTTGATGGTGACCATTAAAAG  
TAATAAGGGACACACAAGGAGTAGAGGACACTGAGAGACAAAATGAATTCTAAGTTGGAGTTCTCAAAAAGTTAA  
GCTGGAGACACAGGAAGAAGAGAAATTTAAGGAAATAGTCAAACCTGGGCCATATCCACATTGGCTTCTTTGTTT  
TCTTAACAAATAGCCAGCCTGTCATTACAGATGGGTGTGTTGTGTGTGTGTGGGGGGGGGGGGTGTGTGTTTGT  
GAGTGTGCGTGTGTGTCCATTTTTACACAGGCAAACCTAGACTAGTGAATGTTTATATTTATGAGACTCCCTAAATCA  
TCACAGAAACCTTCATTTTGTGTAATCAGTTCCAAAAGTAAAGTAAAACAGAAAATGAATATGCTGTGAGATAATT  
TTGGGTTGGAATGGATCCTGAGTTCCTCCGTGAGCACTCTTTCCCTGTGATGAATCCTGTGATCTTTTGCAGGTCT  
CCAATGAGATCCTCAGATAACCATAAAAAGCCCCACAGTGGCCTGTTCCACCTAGCTCTCCTCTAAACACATGACCC  
CCTACATACCTATGTATAACTTCAGCCTGTCTATAGCCTGGAAATTCTAGTCTTTTACTTATATGTGACCTCATTCTCA  
GAAAACACTGAAGGTGTAACCAATGCATATATGCTGACCTCTTTTCTACGCCAGTTGTCATGGGTTTCAAATGTTAT  
GAGTTTGGCCACTTTGTGGGTCAATTCCTGAGGAGCCCATGTACTTCATGGAGGTCTGCCTGGGTTCCATCTATACT  
CTGAGAGGTTTTTTTTTTTTTTTTTTTTTTTTTTTTTTTTTTTTTTTTTTTTTTTTTTTTTTTTTTTTTTTTTTTT  
ATAATTTTGTATGCTTCAACATTTGATAATAATCTCTATTGTTGATTAATTTTAAATATCTGGGAGAGTTTCTGCAGTA  
ACTGATTCTCTTAGGGATTAGTTGCTGTGAAAAGACACCATGTCAAAGGCCACTCATAAGAGACAACATTTTCATTA  
GGGCTTTTCTACGTTTCATTACAGTTTCCAGAGATTTACTCCACAATCTCAAGGCAGAAAATATGGCTGTGTCTATGC  
AGACATGGTGGTGGAGAGGAAGTTAGAATTATGCATCTTCATCAAATGCTTCCAGGAAAAACTATGTATTCTGT  
ATGCAGGGAGGGTCTCTTCCACACTGGTAGAGCTTTAAAGCCAAAAAATGATATGCTTCCCTCCAGCAAGGCCAGA  
CCTATTCCTACAAGGCCACACATCCTCATAGACATAATAACATTTAGAATGCCACACTGGTTTCATAGCAATTGACAA  
GATCTAGCTTCTTCAAAGAGGAGGAGCCTCAGTTGAGAAGATGCCTCCACAAGATCCAGCTGTTAGGAAATTTTCAT  
AATTGGTGGGAGAGACCCACTCCTTTGTGGGTGTTGACATCCTTGTATTAGTAGTCCTGGGTTCTTTAAGAAAGC  
AAGCTAAGCAAGACTAGAGGAGCAAGACAATAAGCATCACCACACCATAGCCTCTGAATAAGCTCCTGGCTCCAG  
GATCCTTTGTTGTTTCAGTTTCTGTCCCAACTTCTTTGATAATTAACAACAATGTGGAAGTATAAGCTGAATAAAAC  
CTTTGCTATGGAATTTGCTCTTTGGACATGGTGGATCCTTACAACAATAAACATAGTAAGACTTTCATCGGAAAAAT  
GTCTAACAGTGCCAATGCCACTTATCTTAAAACCACGAATAATAGTGTGTAGACATTTTTATTTTTATTTAAAGGTAA  
GATATACTCGTGACCTACCTGAAATGTAAATGTTCTAGTTTGTCTTTTTTCACTATGTAGAATACTACAATCAAAA  
ATAACTTGAAATAGAAGGGTTATAGTCTATCACCGAGGAAGAATAAACAGGAAGTTGTATCAGTAACAGCAAAA  
AACTGCTTATTGGCTTGCCACTGTCTTAGTCACTCTTTTATTGATGTGAAGAGATACCATGGATAAGGCAACTATTA  
GAAAACAAAACATTTAACTAGAGGCTTGCTTACATATTCAGAAGTTTGGTCATTACCAAGGGAGGGATCCCATCA  
CTGGAGCAATAGAGAATATTGATCCTAAGCAAAGAGAGAGATTCTGCCATTGCTTTGTCTTCTTGAAAAACCTCAA  
ACTCATCCTTGTGACACACCCACATCCTCCAATGAAGCCTCACCTTCTTATTCTTCTAATCTTTAAACTCACTGC  
CACTTCCCAGTACTAAGTATTCATATATATGTGTCTATAGAGAATTTCTTATTCAAACCTACCAATTTTCTATGGCT  
TGATCAGCTTTTATTATTTTAGTACAGTCTAAAAGGCTCCCAATTAATGACTACTGTTGAGCTTAGCCACAGTGG  
TGGGCCCTCCACATCAATCATTACCCAAGAAAATATCCTATAGACTTACCTAATAACTAAGTGAATAGAGACAGA

TCTTCAATTGCTCTCTCTTCTCAGGTATCCGTTGATTGTCAAGATTGGGAAAAAATAAAGTCCCATTACAGGAATAT  
TTTACTGACTCCACAACCTACCCAAACATTACTGAACAGCATTTCCTCCTCTCTGCCCTTCATAGACCCACTTCCAT  
GCATGGCATAAGTGAAGGATAACTTCTTTCATCAGCATGGATACTCAATAATAGGTGAAATGATGTGAATATGTCC  
TATAGCCACACAACCCCCACATTCTACTGTGTGTTACTTACTGGGGTACAACCCAATCTGTCCAATTTCTGCCA  
ACTCAGCTATGAGAAAAAAAATCTCCTCATCAATAGATCCAATGAATTTTACCTTATTTCTTCTCCTGGGGCACT  
CAGTGTTATCCCTTCATGCATATATTGATGTCTTATTCATCTGTAATAAAACCAATACTATTAATAAATACATCACAG  
GAGATATGACAAATACCAACTCCCATGAGCAGCTGCACAGTTGGCCATGCCTTTTCAGTGCTTTTTTGAAGTTTCT  
TTGTATACTAAAAAGTCAATTGATTTCTTTAAGTGTATAATTAATGATTCTAACACATTTTCACCTCCATTCCATTT  
CCCCTCATTTTCTGCTTCTTCATATGATATTGCAATCTATTAATAACAGTACTGAAGGCAGAGGGAGGATCAGTGT  
GGGAAGCTGCAAAGTTTTTATTTCTAAAAACAACAGATACACTGTCTAAATATTCCAGATACAACCTTTTTGGTAACT  
TTGGGTCTACTGTTAGCATGAAATTTCTAGAAAAAAAACCTTAAAGAATTAAGCCATGGTTTCTCTGGACCAGAG  
AGTTCAGTATCACTAATGAGTCATATTCATGTCAATCATTTTCATCACTGTTACAAGATGCCTAGCAACAAGGAAAA  
CAGGTCCATGGTCACAAGAGTATGAAAGGGGCATGAATGAGCACAATTGTCCAATTATTGGCAGCCAGTAAACA  
TCAACACAGGAAGCGACCAATACAATAAACACCTTCCAAGACATGTTCCCAATGACCATGTTTCTTTACAAGTTT  
TCACCCCTTCATGCACACCCATCAATCAACGCATAGATTAAGCCCTCAGTGTCCAATCACTTTTCAGATTGAGTA  
TATTGTTCTACCTATGAACATTGACTTCGGACCAAAACCTTCATCAAAGACCCAGGACAGACATTTCAAACCCATT  
TCACCACAGCATTCTTTATGCTACACAAAGTGATAGGATCTATCTGTCTCTTTAAGGGTATCTCTATCAAACAGTTCC  
AAAAGGAAAATGTTCAAGTAAACAGCATCAGCACCTCCAGGAGCTTTTATAAATGTGAGTTCAAGAAGAGCGAAA  
TTGCAATGCAATTTAAGGGTCTTTGTCCCCATCTCTGCATCTTAAAACCATAGGGTGAACACAGAAATGTAGGTC  
AAAAGTGTAATTTGCACCTATACTACAATAATTGGGATGATTTCTAGCCATCTCTAGGTTCTGTCTGTTATGGAGT  
CCACCAGGTCTGCCTCAAGGCATATTGCCTAGTGTGAAATAGTGCCAGCAGTTGATTGCAAACAACACTATGTGTT  
GACTTACATGTAAAATGAGACATGTATAATATAGACATATTTGTACATACACACATACTCACAGAAAGAGGCAAGC  
AGTAGAGGAGCTTTGTCTTAGGAACTCTCACGGAAGAGATGGTAGAAATCTTGTAAAGGCAGAGAGGTCACTGAG  
ACACTGTATGTCTCTACTGCACAAAATCAGGCCAGTCTGCCTTGATCCCTAAGTGGTATGGTATCACCATCCATCA  
TCCCCATCTGAGAATATATGGACTATTGATGAAGGATAGAGAATCAGTTTTTCATCAAAGGTAAGGCTTTTGTATGT  
GATAGGTTTGTGATGCTCTACTAGTAGCCCCATGTCCAAGAGTTTATGGGCAACACAATTGATTTGAATTGGGTTG  
TATCAAAGGGGAGAAAAGTAGACTTGAACCTGGGAGGAGGATTAAGGTGGGAATGGGTCTGGTTTTAGTCTGGG  
AGGAGTTATCAAGAGAATTGGAAAGTGAATTCATCAAAAAAATTGTATGAAGTTCTCAAGGAATTAATTAATGTA  
GTTCTTAATATACAATGTCTGTACTGAACATATACAGACCACTTATATTTCAATCTCCTAAATAGCAACTCATTTTAT  
AGCACTTACATTACATTAAGTGCAAAAGTAATCCAGAGATTATTTAAAATAAAGAAGGATCAGGGGATATGGCCC  
AGAGACAATGCCAGGAGTGTGTTCAAACATTACCTACAACAACAGTGCTTAAGATTTTTGGGAGGGGCAGAGACA  
GGAAGATGATTGTGGCTTCTGAAAGCCAGGCTCACTACCAGCTCAGCAAGAAACCCAGTCACAAGGGGATAAGT  
TATGGAGGAAAAGAGTAGATCACACTATAACCTTCCCTAGCCTCTGAACTTACCTGTACAGTTCTCTATGCAGACTC  
ACATAAATATGATTAATAATATGCAAGAGGTTATTTTGCATAGCTTATGTTCAAAGCAGTGTTGTTTTAGACTAGAA  
ACCTGAGGACTTTATATCATTATAGTTTCTGGAGCAAACCTCCAAGATATAGATGATGGGTATATCTTCTTACTGTG  
CAAAGGAAACCTCAGTTAAGTGTGTGTGTGTCAGTAACTCAAACAGCTTTCCTCCTCTATGTTACTTTATATAGCATA  
GAATGATCTGTAAATAATGAAAATATGAAAACAAAGCTTTTTTTGAGATTTTAGGCTTGTGTTAAAATCATATGTAT  
AACATTGTATTAATGGAAGTGAATCTTCAGCTCTCAGGAACAATACAGTCAATGCTGTAGGCTTCTGTTTTGTCC  
CATTGTGAACAAAATTAATTGCACATCAACAGGTCCCACACTTTTAACTAAATCAGGGAGAAGGGCTATGTTTCCG  
TACAAATAAGTAATGTCAATGTGATTATTCAAGTAGAAATCTGGCAGGGTTAGGATGCGTTTTGGCTTATGTGATAG  
TGATGACTGATTAGTCTCTTGTATTCAAATAACCCTTACCTCTGAGAAAAGACAAGTAATGATATAAGATATACTA  
CGAAGTGACATGGACACTTACTAGATTTTCTTTTACATACTTTAGTTGTTTGAAAAATTGTGGCCACAGAA



ACCCAAATAGCAGCTTTATGATTGAGATGCAGATATTTTCACCCAATCAATGGATTGAAGCATCTGACCCCTGTTGT  
TGAATTAATGAGGTCAAAGATATTAAGAAGAGGGCATCCCTGTGGTAGGATCCCTGTCTCAATTAAGTGTCC  
CCAAGATGTCTGAAATTGTGGCCCAACAAAGAGACAGAATGCACCTGCTGATATGAGGCCTCCAACACATATA  
GGAGAGGATTGCTGGGAGGAGAAGTCTACAATTCCAATCTCCCACTGGAGGGCATTTCATCTAATGTGTTTTTT  
TTTTTTTAATTCCTTAGAGTCTCTCACATCCCAGGTCTCTGGTTACTCTAGAGCGTTTTCTCATTTCCTCCTT  
AAGTTGCCTGTTCCATTCTTTTCGCTGGTCTTCATCAATTCAGTCTGTTCCACAACCACAGTACCTGATAAAAT  
TCCTCTATTCTCCTTCTGTCCATTTCCACCCAGGTCTCTCCCTCCCCTATCTGTATTGATTTTTAACCTTCTTAT  
ATTTCTAATTATGTTTATGACTAATAAAATAAATGAAGTTATTTTTTTGATTCATTATCTTATTAGTTTTCAAAGG  
TGATATACAAATACCAAAGGTACATTGGTTAATTTATTTCAATTCATTTGATTTTTGAGATAGGCAGTTAGTAT  
TTTGTATTCTCCAGGAAGGTCTAGAGTGTGAGGTTGAGCATTCCATGCTAGTACCATTACAGGTATGTAAAACT  
ACCTGGCTTTAATTGCTTATAATAAAATAGTCCAAAAATATCTATAAACACTATAAAATAAACACCTTCCAGTCT  
GAGATGAAAATATTTCTCCTCATTACAAACCTCATTGATAGAAAGTATATTTGTTTCTGAAACAACTAACTG  
CAAAGTGAAGTCCATGATTAGCCCCCTCTCTGGTTTCCAGGCTCTGCCGCTTCTCTGTTCCATTATTATTGATG  
TCTCGAACAGGGGAATGCCAGGCCTACGACAGGAGAGTGAAGTGGTAAGGGGAAGGGTTGGGGGAACATACAG  
GGGAATTTTGGGATAGCATTGAAATCTAAATGAAGAAAACATCTAATTGAAAAAAAACCTTAAGTGTATTACAT  
ATGTACACAGGGACATGTGGCACATATGTACATAATTTAAAATTATCATTCTTTTCAATACTCTGTTTTTCATTT  
TTTATTATTATAATATATATGGCAATTCTGAAACTTCTTTGTAGACTAGAATGCCTCAAAGTGAAGTTGCCTAC  
CTCTGCCTTCAAAAACCTGAGATAAAAGGTGTGTGCCACCACCACCTGGCTCCGAAATATTTTTACTTAGTGGGA  
GATGTCCATTATTTTTTCTGTTAGGATATATCAAATCATCAAGATGTCATATTTCTTAATCAATTTATGAGATT  
AAATCAATCCCTGTAAAAATATTTGAGTACTTTTGGAGACAGGTAAGTTTACAAGAAACATCATTTAAAAATATT  
TTATTTCTGGAGCCAAAACCTTGAAGTACCTTGCATGCAAACCTCTGTAGCTAGCCTTATAACACCCGGAGGCAAC  
TCCACTGCCAGGCATCTAACATTATAGGATCCGATGATCAGACAAGAGGAAGACACAACATCTTTCCCAACACC  
TTGAGTAGAGGGTAACAGAAAGACACAGGCATGCAGGAACTCCACCAGACCAGTGGTATGGATTGCATCCATTCT  
GTCTGGGACAGGGCCCTGAGCAGTCTTGGATGCAAACCTCAGCAGCCAGCCCCATAACACCCAGAGGAAGCTCCA  
CTACCTGAAGATCTAACATGGCCAGGGTCAGAGGATCCAGGAACCTAGGAGCTTAGTCACACCAGGATCTCAAG  
GTTCCAAGGGCAGCTTACTCCCAGGATGTCAGACCCACCAGCATCTCATAATCACAGTATACTGTAATAACAGG  
ATCATAGAGACAGCTAGACTTTGAAGAGTTATGACACAACCAATATCACAGGAAGGACAGTCTGATGTAGCCAGG  
GCATGTAGCACTTGAGATATCCAGATGGTGAAGGCAACGATAAGTTAATAAGCAGGAGAAACCAAAGTTATTTG  
GAATAATCAGAACCCAACACTTGCACCATATCAAGTGGATAACCCAACACACCCTAAAAGTAAGACATGGATCTAA  
AGTCACTTCTCATAGTGTATGATGAAGGACTTTATGAAGGACATTAGTAACTCTCTTAACAAAATGCAGGAGAAC  
AGATAAACATGTAGAAGTCTTAAAGAGGAAACACAAAATCTGTTAAATAGATTGAGGAAAACACAATCAAACA  
GGTGAAGGAGCAGAACAAAACCATCCATGATCTAAAAATGGAAATAGAAACAATTGACAATTCTCACTTAGGCCA  
TGAAGCTATGGAACATTTCCATTTACTGAGATCCAGAGGAGTAGCCATTTGGAAGATTGTGTCCTAAATGTGAAG  
GTTGTGCTGAAACTCTTATGAAAATTGAGAACAATTTAAATATGAAAGAAAAAACACACAGTAAAAATTCATG  
TAGGCAAAATTGACAGCCTTCTATGTGTACAAAACACACAAGCAGAGATTACAATTACAATAATTTTTTATATC  
AAGGGGTCAAACCTCTGATACAATCAATGTCCAAGAAGAGATATTTAGAGCACACACTCACCAGGGACAAAAGT  
TCATGACTGGGACAGCATGGCAGGAAACAAAATGTTGATCTGTTTCATTGAGGGCCAGCATGGGGCCTTCTTACA  
CTTTTGTGGAATAAGCAGCAAGAGTTAGGTGAGAAATAGCCAGTCCCTCAATTATGCCAAAGTAACCTATTTCT  
GCTAGGGAACAGTCCCAATGTTCCACAACTTGTAGACTGTTCCACTAGTTTGAAGACACCTGAGACTGTGGGAA  
AATTTACACCCAATCTTAATGAAACTGAACCAGGCATGTGTAAAATACTTTTTGAAAATAGTTTCATTTCAATTCA  
GGAAAAGGACAGAGAGCCCTGCTTTGTAATGGATGGAGTTAGTCTATAGCTTCCATTGTGCACCCTAAATGAAA  
CATAGTGTAAGAAGCAGTTTTCTATGTAGCAAGTAAGGAGTGAACAACACACTAATGGAGATAAAATGCAA

AGAACCGGGATATATAGTAACAATTCCAATTATAAGTGTGAAAAACAAATATACATATATGTGAGTTGTGCTTGT  
TATTTCCCTAATGGTTTGATTGTACAGGATAAAAAACAATAGTCTGTCCCTATTGGCCACAGTTTCATTATCATTGT  
GTTAGTGGATCCAATCTAGGAATTAATCATCAGGGTTTGACAGCAAATCCATCGGCTCAATACACCAGACATTAG  
CTGGAAAGTGAGGTACAAGTAGGTAATGTCTTTGGTTTCTCTCTGAGTCTGTTATATGGGCGTCTGTCAATTG  
TTTGTTATTGTTGTTGGTTGTTGTTTTAAAAATTTGAAATATTGAATGCAAAGCAAGTGGCAGGAGCCCAACAGGT  
CTTTGCATTCTTACTTTCTCTTTCCATCACTCTCCAATCTTCCAATCCCAGCTTTCAATCAAGAAACAATCATCAG  
AAACAATTGAAAATAAGACTCCTTCATCATCTTTACTTTGTGCTTGCATGTTGGCTGTAATCATCTTAAAACATTAA  
AAATCAGGCTAAGATTCTGCCTATGTTTGATAGGGTTTCATTGCTGTGAAGAGACACCATGACTCAGGCAACTCTT  
ATAAAGGAAAATTAATAGAGGTTGTCTTACAGTTTTAGAGGGTCAGGTCAGTACATTATTATCATGGTGGGAAGC  
ATGGCAACATCCAGGTAGAAGGGGCGATGTAGAAGGAAAGAAGTTTTCTATATCTTAATCTGAAAGGAAACAGG  
AGGAAGCTTGTGGCCAAAGCAGCAAGGAAAAGCATCTCTTTCATCACTGGGCAGAGTTTGAGCACTAGATAAAA  
GCCAGCCTACACAATGATCAAGGCCACATCTGCTAATAGTGCCACTTCCCATGGGCCAAGGATATTCTAATCATCA  
AACTGCTACATACCTGCAAACACTCCTGTATGCATGTATGCACACACACACAAAGACACACACACACACACACA  
CACACACACACACACACACACACACTTTTCATGCCTATTGCACGTGAGATTGCATAAAAATATATTTGTCTATTTA  
CACATATATTTATTTTTACTTACTTGCTTGCTTGCTTATTGCTTACTTATTTACTTACTTAGTTTTAAATGT  
TTTGCTGAAGAACTTTGTACATAAACATAATGAGTTTGAGTAAATCCATCACCATCTCCTCCTTGAATTGCTCTCCAT  
TTCTCCTGTATCACTTTTAGCCTTAATTCCATGCACATTTTAATAAAGACCACTGAGTGAATTTAGTGCTGACTACAT  
ATGTGGGGTTAGGGAAACACATCCACTGGAACATGGGCAGCCTCTGAGGAGCCAAATCTATGAAGAAAACCTGGC  
CCTCACACCTGCAGCCACTAATTGCCAATTTTTGGGGTGAAATTTCTCTGCTCCCCATCTATTCTTCAAGAACTG  
TGAGACAGAAAATTAAGGTTGAGATCTGCTTAGAAAGGACTTTAATCTCAGGATATGGGAATCAAA  
ACCAGGTAGAGATGAATTCTCTGCTGATCTGCACAGGAAAGCACAGAAATCTAGGACTATACAGAAATATCCAGT  
TCCAGAGAAGAAAACAAAAGAAACAGGGGAAATTGGGAAGTACAATAAGAATTTGAATGTACAGATTATAAA  
TCCTGTCTCTGGGAATAATAATCAAGATACTTTGAAAGGAACAATCAAGCCATGTTTAAAAGACTGGACACACCAT  
TTGGCATATGTTATATAAATCAGTAAAAATAATTAATAAATGTCTCATTAAAAATTCACAACAGTCCCCTAAGTTTTT  
CTTCTGGTTTTCTCTTTAAATATCTTATTGAATCTGAAGTGATGGCTCAGCATTCTGAACACTGGCAGCTCATGCA  
CAGCATACTTGGACTTGCCACATTTCCATAGGCTGTTTACAACCTTCTTATTTTAGTAACCACAGGGAATCCAC  
ACTCCCCCTCCCATGAGACAATGTATCCATACCTATACAGAGAATTCAAAACAAAACAAAATCTCTTCAATCTGTCTC  
ACCAATCATACATTAGGTCCAATGCTTGGGTGCTTTCTGTTTCAGGCTCACAATGATCAATGGTATATACTTTCTAG  
GTTGTATAACTGCATTCATTTCTTACCAGGAACCTTTCCCTCAGATTCTGTCTCATCAAGAATCCCATCTAATACC  
ATCAGACACTTCTATGCATCAGAGGGAACAAGGTCTAGCTGTGTGCCTTGCAGGTTGGGTAGAGCACTGTCAATA  
TCCCTTCTCCTCCAGCAAACCCTCTCAAGGCTCACAACGGTGTCTTCCAGGATAAAATCTGATTGCCTAAGAGAAG  
GAGCAAATCATCTCTGCTTGTCTAATGTCTAATGACATTGCAGATTAAGAAAAAACCTAGAGCTTCCCCAAGATT  
CTCAGTCCCGGAGCATTTGGACAATCCATTACTTTTCATAGGGTCCAAAATGTTTGAATTCTACAGACCAATGAATT  
GTCCATTAGAAGCCAACCTTTCCAGCAGGTAGCAGCAGCTCCAAGTGTCTCCTCAAAGGCAGTTAAACAAAAGCA  
ACCTGAAGAGGCAGGTGAACTGCTCCTGGTCCCACCAAGGTGACTTTGGTTTCTGGTGGGAGGGGGCAATTACAT  
GCTGTGAGAACTCTGTTCTGTTGATGTGCTCACCCACAAAACACTCCTTGGAAAGACCAGGAATGAGTTCTCT  
TCCAAAATCCCTCCTCTTGCATGTGGTGTTCATTCCATGGGTGTGGGAGTAGGCTCTATTCCTGGGTACTCTGTT  
TCTAAATGAGGTGACACACAGTGATCACTCTCCTACCTTTACAGATGATTGAGACTCCTAATCTAGACATTATT  
TTTTTATTTATTTTTCAATCTGCGAAGGCAGATATGGTTGTTGTGAACATTACAGTTTGCATGGCACTTCTTATA  
TGTAATACATCAGAGGACAGAAGAGGATACAGCAGCATATGCTGCTGGAATTACAGGGAGGATGAGAAAGAAAG  
GGGGGGCAGGGAGTGAGAGGGAAAGAGAGAAACACAGACTGAGACTGAGATACAGAGAGATAGCAATACAGA  
GAGTGGGGAAAGTTAGAAGGAAAGAGAGAGAGGACAGAGAGACAGAGAGACAGAGAGACAGATAG





GACTTCCTTTGCATAATACCTTCCTGTGTTGTTAACCATTTCATATTTGCTGTGGATTTACTCACAACAAACAGATAAA  
CTGAATTGTGAGTATCTTCTTTTTTTGGTGTCTGTTTTGTTTTCTTTCTGGTGGTGGGTTAACATGTATGCAAATC  
AAACTACCATCGAGTCACATCTCTAGCTTAGACAGGGATTTGAATCTTTAACACTAGTTATTTCTCTCCATATTA  
CTGTAACCTTTATAATGTTTTATTGTAAGTCTGATCTGTTACTGAAATTTTATTCCATTTATTCAAATTTATGTAGG  
TGCTAAGCAACGTCACCCATTGCTGATATTTTTTGTTAATAAGGCAACTTGATCAATAAATGACTTCTTTTTCTGAC  
TAGTGCCATATTGTGTTTTCTGAAGACTTGTATCTTAAGCCGGAGCAGAACTTGAATGTACACTTGAGGAGGG  
TTTTTTTTGGGATTTGGTGGTTATTCAATGTATTAATGAATGTCAGGTGCCTGATGTTCTATCAGAGTAATGGTG  
CTCCTTAAGCTACATGTTTCATCTTTATGTTCTCATACTTTTCAGAACAATATTTTTCAGTACCACAGAGCAAATGT  
TACAGGTTCTTAGCTTTAAACTCTCAGTAAACACCAAAGTCTCAATTTGGACTTCAGTGCAGCCTCTTCTCTAAAA  
GCTAGTCAGAGGATGCTTAGTCTGTGAGCCCAATCTTTCTTTTTATTCCAAGCATGGAGGGAAAATGGCATGCC  
CTGTAAGGGTTTTGCAATTAGAGATTCTGAAGTCAGCAAATCATACTTGTACCCTATTGAGTTTGCACATCTGTAA  
TAGCAAGTGAAAGAGTGGAATCAGTACCATGATGGCTCAAAGAAGTCTAGAACACCACTGCATTCTGCCCCCTT  
GTGGGTGCCATCCCTGTCACAATTTGAAGAGAAACAGTGTCTCTCCAGGAAGCTGCAGGGAATTGAACTGCACT  
CCTCTGCATGCTGTCAGACCCAGCCTCTAGGTCTGGACTGACTCTCTTAAGGATAGTCACTTACCCTCATGGCCCC  
AGTCCCTAATTCTCTCAGTCTCCACAAAACAGGAGACTCTCTTTATTTTTGTGCCAAATGATGTCAGCTTCATT  
TCAAATATCTGATAAACTAACTGGTTGGTCTTAAAATAATTTCTTTCTCTCAACCACCTATTTACCAGGAAAAT  
GTCGGTGAGAATGGCTGAGACATCTAGTCTGGGCGAGTTCCCATGATTAAGGGCAGGGAATATGAAGATAAGG  
CCAATTATTAATACTTCAAAGTCTAGTTTTAATTGGCATCTCTAATGCTGTGCAGAAGAAATGTGAGATTGTG  
AGGTGACTTCACAGATTAATATAAGAGGTGAGTCTAGAAAATCAGGAGCTGTCTATTGAGAACAGCACTGGACCA  
TGCCCTCCTTTGAGGATTTACTTTAAAGCTGAGATAAACTGTAAAAAATTATGTCTTTCTGAAGTTTATGCCA  
TGGAATGTCCACATAATATCTTAGTTCATTGGTGTGATGTTTTATACATGGCTGTAAATGCTTTTATGTTAACCTGT  
GTGTGCTAGTGTGCTTCTTGACATGAAGCTAAAGTCACTGGGAAGAGGGAACCTCAAATTGGATCTGTCTAC  
ATTAGATGAGGCTATAGCCATGTTTATTTGTTTTCTTAGAAAATTTCTTTAAATTTCCATCTTATGTGACCTGAAA  
GTATCCATCTCCCTGTTTATCCTCCTACCATCGAACTCAGAGACACAGTGAACCTAACAGAAGTTATGGGCCAAATG  
AATTTAACAGATACTTATAGAACATCACCCAAAAACAAGAACACACATAATATGCACTCATTCTTAAGTGTATATTA  
GGCAAAAAAAAAAAAAAAAAACATGGAATACCCATGATACAATTCATTGATACTATCCATTATCTCTACCTATGGTC  
AGGATATTTTTCTGACTTTTCTTTGCATAGATTCCTGATTCTTGAAGGAGAGAGCTCGATAAAGGCATCCTCTTTA  
ATCTTTAATTCTGAGTCTCTCACTCTCTGTGCATTGTCCAGTTGTGTCCTTCTGTGATTATTACCAGTTTTGTAGGA  
AACTCACCTCTGATGAAGGCTGAGGCATATATACTAACATATGGGTGGAGCCATTAGGATTCATGAGAAGTCATTT  
TACTGCTGTGGTATTTAACAAAATTTATGATGGCAGATTTTCACTTAGTGTGTTTATGACCTTTCTAGTCTCAGATGC  
TTGGCCTGATATTTCCCTCCACATTTAACCTCCTATTTAGTGTCTTCTTATTCTTTATACCACTATATTCTACTTC  
CCCTCCTTGAAGAAGTCTCCTTCTTTATGGTTCCTTACTAGATAGCTCATCTCTGTTACCCTAAATGAAAAACAA  
ACATATATAAACCTTACAAGCTAACTCCATACATAGGTGAAAACATGCAATTTGTGTCGTTCTGGGTCTGATTTTAC  
TGTTGGATATTTCCCCCCCCCTTTTTTTTTAGATACTTCAGTCTTCTTTTTTAAAAAATTTTTTATTACGTGTTTTT  
CTCAATTACATTTCAAATGCTACACCAAAGTTCCCATACCCTCCTCCCACTTCCCTACCACCAATTCCCATATAT  
TTTTGGCTCTAGCATTGCCCTGACTGGGGCATATAAAGTTTGGTTGTCCAATGGGCCTCTCTTTCCAGTGATGGC  
TGACTAGGTCATCTTTGATACAAATGTAGCTAGAGTCCAGAGCTCCGGGGTACTGATAAGTTAATAATGTGGTTC  
CATCTGTAGGGTTGCAGATTCTTTAGCTTCTTGTGACTTTCTCTATCCCCTCCATTGGGAACCCTGTGATCCATAT  
AATAGCTGACTGTGAGTATCCATGTCTGTGTTGCTAGGCCCTGGCATAGTCTCACATGAGACAGCTGATTAACAG  
TTGATGGGAGAGGATCCAGTACTCATTGAGAGGTGCTATCTCTGCAAAGATGGTGATAAAATATATAAGAAAGCA  
ACCTGAGGGTAGTGTGTTGAAAAATGGCTCAGTGTGTTAAGAGAACTGGCTGCTCTTAGAAGGTGAGGATTTGAA  
TCACAGAAGTCAAGTGGCAGCTCACAGCCACATTAAGCTCCAATATCAAGGGACCAAGCTCGCTCTTATGGACTCT

GTGAACCTGGACAAAAAGGCCACAGACATTCACGCAAACAAACATTTTTATATACATATATGTTATTA  
ATAAAATTTAAAAGGCATTTTTAAATTTTGTAAAGTAGAAAAGCTGAGAAAAGCTGTTGAGAAACAAGACAATA  
GCAACCTTGCTCCATGTACCCTACCTATAATCCTACATGGGTTCTGCCCTGATTTCACTGAGTGATGGAGTGTGAT  
GTGGAAGAATAACACAACTAATCTTTTTCAAAAAAGAAGGGAGGAGAGGGGGATTGGAATGGGGACTTGTGA  
TGGGAACTGTGAAGGAAGTTATCATTTAAATTGTAATAGATAACTAAATTAATGATGAAAAAATAAGTCCTGT  
CAAGAACTCCAATGTGACAGTGTGAACTGCTAATCTACAACCTGCTAACTCACATGTGTGGGGTGTGGGCATG  
CAAGTGTCTGTCTGAGCCTACAGGCCACTTAAATCCTCAAAAACCTGTGGAGTTCAACCTGACTTCTGGCACA  
GATGATCCCCAAAGTGATTGGGAAGTGCTTGTGCAGGTAGCAGACACCTCAATCTTGGCCCAGGTACACAAAT  
AGCCAACTAGCTGCTATGAACAGGACAAGATACTTTTGAGGAAGATGTACCCACGTGTGGCTTGAGATTGATGTA  
CTGGATGGTACTCTGCAATGGTCAGAATCCAGTGTCTTTTTCCCATCATCCACAGGATCACCAATATGCTGTAGAA  
TGATGAGGAGACAGAGAGGTAACCTTGCTAGCCACCACAATGCGATGTGGGAATGGGTATCCAGATGGAGGAAG  
ACCCTCATTAAGCAGTGGGGAGGGATGGGATAGAGGGTTTCTGGAAGGGTGGGAACTGAAAACGGACATC  
ATTTGAAATGTATATAAAGAAAATATACAATTAATAAAGACCAACCAAGAGCACATAGGGCGGGGCCCATGGC  
TGCGGCTTCATATGTAGCAGAGAATGGCCTATTTGGACACCAGTGAGAGGTGAAGCTCCTGTTGAGGAGAAGGCT  
CTATACCCAGTGTAAGGGAATGTCAGGACTAGGAAGTAGGAGTGGGTATTTGTTGATTACTGAGAGGAGGGA  
TGGCATAGTGGGTTTTAGAGGGGAAACCAGGGAAGGGGATAAGATTTGAAATGAAAATAAAGAAAATGCCTCA  
TAAAATAAAATAAAATAAAACAAAATAGATTGAAAACAACCACCTAGACACAATAAGTTAATAGCAGAATGATAA  
ATAAAGAAGACAGTGTAGTGGTGCATACCTTTATCCCTGCTCTTGGTAGGCAGAGGCAGGGGCAGGCAAATTT  
ATGAGTTCAAGGCCAGCCTGAACTCCAGATTGAATTCCATGACAACCAGGGCTAAACAGAGAATCCCTGCCTCGA  
AAAAACAAAAACAATAAACAAATAAAGAGAAAATGAATGACACACAGGCATACAGAAGAGGACTGGTCCAAA  
GACAGCTCTGTCTAAATATACTAGAGCACATTGCTTCACAAAATGAATTCTGAACATGCTCTCACATAGGGCATT  
GAATATACTTTCTAGGTTAACCCCATATGATCACAAGAAAACAAAAGGTAACAAGAAGATCAGAGTCAGAAGTATA  
TCTCAGACTCATGTCAAAGACAGTCTGGGAGGCACACCATGCTTCAGTTTTCAAAGTTCAGAGAGTGGTTCTCCA  
CCTTTTTAATACTGTGGTTCTTCATATATATACTTCTTATGCTGTGTGGTGCCCAACCGTAAAAATATTTTTGCT  
GCTTCATAACTGAAATGTCCTACTGATATGAATTATAACATACATTTCTGACATACAGATAGTCTAGGACAACCTCT  
GTGAAATTTGTCACAAGGACTAGCAACCTACAGGTTGCCAACACAGTGCCAGCACTAGGAAAAGTACCCAGCC  
CCTTGATTTTTACAATGTTGCCTCCGTAACCTGTGGTAGAATAGATGTGCTCTATTTAGTGGTCTAAGCATGTTAG  
GATCTGTAACACTACCTGGAAACACACATACCAATTGGATGAGGGAGTCTATTTTTCTGTCTGGACCTTGCAG  
GTTTGAGTCAGCTCTAACCAATAGAAGAGAAAGGATACTGGATGAATTCCTACTCAAAGTCTTTGGAGACAACA  
GGGATTTTATTGGGTTCTCATGGAGAATGGGAGAGTGTGTGCTCCATTAAGGTAAGTACTCACATTCATTTTT  
GATGCCTTTCTTTCTATTTGAGTGTGCTTTGACTTTTGTCTGCTATGTGTTGTGTTCTGTGTTCTTTGTTACTA  
TAGGGTTCTTCCATACTTGGAAAATGAAAGTCAGTTGAAAACCTTTCATATTTGTTCTCTGTATAGAACTCTCTC  
CCTCTCTCTCTCTCTCTCTCTCTCTCTCTCTCTCTCTCTCTCTCTCTCTCTCTCTCTCTCTCTCTCTCTCTCT  
CTCTCTCTCTCTCTCTCTCTCTCTCTCTCTCTCTCTCTCTCTCTCTCTCTCTCTCTCTCTCTCTCTCTCTCTCT  
ATGGTTGTTCTGGAAATCACCTGTAGACCAGGTTGGCCTCGAACTTAGAAATCACCTGTCTCTGCTTTTTGAGTG  
CTGGGATTAAGGTGTTTGGCCACCACCTTGGAAATATGATTCTTTAAAAAATTAGATTATGAGTCCTTTGTACC  
AAAAATAAGATCAAAATTTCAAGGAAGTACTTTTAATTGAAAATGCATCTTTCTGATAAAAAAAAAAATGGGGT  
ATTCCATGGAGATACAGAAGTTGAAAATGACCCAAAAGGTATTGTTCTTCACTAATTCCTTATCAGCTTGAATT  
TTCTGAGGATATTGGCCACTGAGGCTTGAAGTATCAAAAACCCATCAGGCTATCTCTCTCTCATTCTTTCTCTCT  
TCTCATTCTTTCATCTCATTCTCTCTCTCTCTCTCTCTCTCTCTCTCTCTCTCTCTCTCTCTCTCTCTCTCTCT  
CCTCTCTCTCTCTCTCTCTCTCTCTCTCTCTCTCTCTCTCTCTCTCTCTCTCTCTCTCTCTCTCTCTCTCTCT  
CATCCAGTGGTTGACATCTAATGTTAATCCATTTCTGTCTATTTACACAGTGAGGCAATCAATATTGATGATG

ACTGTGAAATGGTCCTTCTTACTTTTTTTCTTTTTCTTTTTGAGAGAGTCATGCCATAGACTCATTATAACAGTTT  
TTCTCTCTAGAATAAGTTTGCATGCTTAGCACTTGATAATAATCTCGATTGTTGATTTATTTAATATCTGTGAGTTT  
CTGCAGTAACTGATTCTATTAGTTAGAGATTAGTTGCTGTGAAAAGACACCATGACCAAGGCCACTCATAAGAGAC  
TCATTTCATTAGGGCTTTTCTACATTTTATTACACGTTTCTAGAGGTTCACTCCATGATCATCAAGGCAGAAAATATGG  
CACTGTCTAGGCAGACATGGTGGTGGAGAGGAAGTTAGAATTATGCACCTTCATCCAAATGCTTCGAGGAAAAA  
CTATGTATTTTGCATACAGGTAGGGTCTCTTCCACACTGGTAGAGCTTTAAAGCCCCAGAGTGATATGCTTCCTCCA  
GCAAGGCCAGACCTATTCTACAAGGACACACCTCCTCATAGGCCAACTATATTTAGAATGCCACACTGGTTTCATA  
GCAACTTGACAAGATCTAGAGTCTTCAGAGAGAAGGAGCCTCAGTTGAGAAGATGCCTCCATAAGATCCAGCTGT  
TAGGAATTTTCTTAATTGATGGGAGAGCACCCACTCCATTGTGGGTGTTGACATCCTTGTGGTGGTAGTCTGGGT  
TCTTTAAGAAAGCAAGCTAAGCAAGATTAGAGGAGCAAGACAATAAGCATCACCACTCCATAGCCTATGAATGAG  
CCTCTGATTCCAGGATCCTGTGTTGTTTCAGTTTCTGTCCCAACTCTTTGGTGATAAACAGCAATGTGGAAGTATA  
AGCTGAAAAAACCTTTGCTATGGAATTTGCTCTTTGACATGGTGAATCCTTACAACAATAAAAAACAGTAAGGTA  
TTCTTAGGGAAAAAATGTCTAACAGTGCCAATGTCAATGTGTAGACATTTTATTTTACTTAGAGATAAGCTATAC  
TCATGTACGTACCTGAGATGTAATTGTTCTAGTTTTCTCTTTCTCACCATGTAGAATACTACAATAAAAAATAACTT  
GGAAATAAAAAGAATACAGATTGTCACTGAGGAAGACAAAACAGGAAGTTGAGTCAGTAACAGCAAACACTGCT  
TATTGGCTTGCCACTGTCTTAGCCACTGTTCTATCGCTATGAAGAGACACATATGGTGACGGCAACTATTAGAAAA  
CAAGGCATTCTTTGTGTAGAGAAAGGCCATTGACTTGTGGAGTTAATTTTATATCCAGCTACTTCACCAAAGCTGT  
TTATCAGGTTTTGGTGTCTCTGGAGGAATTTTTAGGGTCACTTATATATACTATCATATCATCTGAAAAAGTGAT  
ATTTTACTTCTCTTTTCCAATTTATATCCACTTGATCTCTTTTTGTTGTGCAATTGCTCTGGCTCATTCTCAAGTAC  
TATGTAATAAACAGGATGAGAAAGAAATTAGGGAAACAACACCCTTCTCAATAGTCACAAATATTAATAAATATCT  
CGGCGTGA CTCTAACTAAAGAAGTGAAGATCTGTGTGATAAAAACTTCAAGTCTCTGTGGAAAGAAATTAAGA  
AGATCTCAGAAGATGGAAAGATCTCCCATGCTCATGGATTGGCATGATCAACATTGTAAAAATGGCTATCTTGCCA  
AAATCAATCTACAGATTCAATGTAATCCCATCAAAATCCAACCTCAATTCTCAACGAATTAGAAGGAGCAATTTG  
GAAATTCATCTGGAATAACAAAAACCTAGGATAACAAAACTCTTCTCAAGGATAAAAAGAACCTCTGGTGGAAATC  
ACCATGCCTGATCTAAAGCTACAGAGCATTGTGTATAAAAACTGCATGATACTGGTATAGAGACAGACAAGTAGA  
CCAATGGAACAGAATTGAAGACCCAGAAATGAACCCACACACCTATGGTCACTTGATCTTCGACAAGAGAGCTAA  
AACCATCCAGTGGAAGAAAGACAGCATTTTCAACAATTGGTGTGGCACAACCTGGTTGTTATCATGTAGAAGAAT  
GCGAATCGATCCATACATATCTCCTTGTAGTAAGGTCAAATCTAAGTGGATCAAGGAACCTCACATAAAACCAGAG  
ACACTGAACTTATAGAGGAGAAAGTGGGGAAAAGCCTTGAAGATATGGGCACAGGGGATAAATTCCTGAACGT  
AAGAGCAATGGCTTGTGCTGTAAGATCGAAAATTGACAAACGGGACCTAGTGAACTCCAAAGTTTCTGCAAGGC  
AAAAGGCACCGTCAATAAGACAAAAAGACCACCAACAGATTGGGAAAGGATCTTTACCTATCCTAAATCAGATAG  
GTACTAATATCCAACATATATAAAGAAGTCAAGAAGGTGGACTTCAGAAAATCAAATAACCCCATTAATAAATGGG  
GCTCAGAACTGAACAAAGAATTCTCACCTGAGGAATACCGAATGGCAAAGAAGCACCTGAAAAAATGTTCAACAT  
CCTTAATCATCAGGGAAATGCAATCAAAACAACCCTGAGATTCCACCTCACACCAGTCAGAATGTCTAAGATCAA  
AAATTCAGGTGACAGCAGATGCTGGCATGGATGTGGAGAAAGAGGAACACTCCTCCATTGTTGGTGGGATTGCA  
GGCTTGTAACCACTCTGGAAATCAGTCTGGTGGTTCCTCAGAAAATTGGTCATAGTACTACCGGAGGATCCAGC  
AATACCTCTCCTGGGCATATATCCAGAAGATGTCCCAACTGCTAAGAAGGACTCATGCTCCACTATGTTTCATCGCCG  
CCTTATTTATAATAGTCAGAAGCTGGAAAGAATTGAGATACCCCTCAACAGAGGAATGGATACAGAAAATGTGGT  
ACATCTACACAATGGAGTATTACTCAGCTATTAATAAAGAACGAATTTATGAAATTCCTAGCCAAATGGATGGACCT  
GGAGGGCATCATCCTGAGTGAGGTAACACATTCACAAAGGAACACTCACACAATATGTA CTACTGATAAGTGGATA  
TTAACCCAAAACCTAGGATACCCAAGATATAAGATACAATTTCTAAACACATGAACTCAAGAAAAATGAAGACT  
GAAGTGTGGACACTATGCCTCTCCTTAGAAGTGGGAAAAAACACCCATGGAAGGAGTTGCAGAGACAAAGTTG

GAGCTGAGATGAAAGGATGGACCATGTAGAGACTGCCATATTCAGGGATCCACCCATAATCAGCATCCAAAAGC  
TGACACCATTGCATACACTAGCAAGATTTTATCGAAAGGACCCAGATGTAGCTGTCTCTTGTGAGACTATGTGGAG  
CCTAGCAAACACAGAAGTGGATGCTCACAGTCAGCTAATGGATGGATCACAGAGCTCCAATGGAGGAGCTAGAT  
AAAGTACCCAGGGAGCTAAAGGGATCTGAAACCCTATAGGTGAAACAACATTATGAACTAACCAGTACACCAGAG  
CTCTTGATTCTAGCTGCATATGTATCAAAGATGGCCTAGTCGGCCATCACTGGAAAGAGAGGCCATTGGACAA  
GCAAACTTTATATGCCCCAGTACAGGGGAATGCCAGGGCCAAAAAGGGGGAGTGGGCGGGTAGGGGAGTGGGG  
GTGGGTGGGAATGGGAGACTTTTTGGTATAGCATTGGAAATGTAATGAGCTAAATACCTAATAAAAAAATGGGG  
AAAAAAGAAAAAGAAGAAAACAGGGCATTAACTGGAGGCTTGCTTAGATTTTCAGATGATTGGACAATCATCA  
CGAGAGGGACCCCATCACTGGAGCAATAGAAACTATTGATCCTTAGGCAAAGAGATAGATTCTGCCATTGCATT  
GGCTTCTGAAAACATACCCATCCTTGTTGATACGCCACTTTCTCCAATGAAGCCACACCTTCTTATTCTTCT  
AAATTTAACTCACTGCCACTTTCTGGTGACTAAATATTCATATATATGTGTCTATAGGTGACTTTATTATTCAAACC  
ACCACTTTTCCCATGGCTCGTTCAGCTATTTTTTAAAATACAGCCTAAAAGGCTCCCATTATTAAGGACTACTGAT  
GAGCTTAGCCACAGTGATGGGCCTTCCCACATCAATCATTAGCCAAGAGAATATCCCATAGACTTACCTAATGAAC  
AAGTGAATAGAGACTGATCTTCAATTGTTCTCTTCTCAGGTAAGTGTGGATTGTCAAAATTGGACAAAAAATAAT  
ATCCCATCACAGTAATGTTTAACTTACACCATAACCTACAAAACTTTACTCAACACCATCTATTGCATTCTGCCCT  
GCATAGACACACTTCCATGTATGGAATAAGTGAAGGGTGATTACCTCCATCAGCAAGGATACTCAATAATAGGTG  
ACATGAGCTGAATATTTCTATAGCCTCACAAACCCCGAAATTCTACTGTGTGTTACTTACTGGGAGACTTGCTTT  
CTGTCCAATTTTATGCCACCAAAGCTATGACAAAAAACTCCTCATAAAGAAATCTAATGAATTTTACTTGATTTCT  
TTCTCTGAGGCAACTGAGTATTATCCCTTCATGCTTATATTGGTGTCTGATTCATCTGTAATAAACCCACTACTATT  
TACAGCTATATCACAGGAGGTATGACAAATACCATCTCCCATGAGTTGGTCAAACCTTTTCAGCAGCTTTTTTTGTA  
GTATCCTTTCTATAATAAAAAATACATTGATTTCTTTATTTTTAAGTGTGTAATTTAATGATTCTAACACATTTTTATC  
TCCCTTCCATTTTCCCCTCATTTTCTGCTACTTCATATGATATTGCAATCTATTAATAACAGTAGTAATACAGCGG  
AAAAACAGTGTGGGAAGAATCAAAGTCTTTTACTAAAACAACAGATACACTGGCAGAATCTTCCAGGTACAA  
CTACTTAGTAACTTTCCGGTGAATGTTAGCATGATTCTTCTAGAAAAAGCTTAAAGAATTAAGGCATGGTTACAAT  
GGACCAGAAAAGTCAGTATCACTAGTGAGACACATTCATGTAATAATTTTCATCACTGTTCCGATATGCCTAGCA  
ACAAGGAAAACAGGTCCATAGTCACAAGAGTATGAAAGGGGCATGAAGGAGAACAGTTGTCCAACCTTATTATTAC  
CCAGTAAGCATCAACACAGGAAGCGACCAAAGACAATAAATAACTTCCAAGACATGTCCCAAATGACCAAGTTCCT  
TTACAAGTTTCTCACCCCTCAATGCACACCCATCAATCAATTAACTCATTGATTAAGCCCTCAGGGTCCAATCACT  
TTTCAGATTGTGTATAGTGTCTATCTTTGAACATTGTACTTGGGGCCAAAACCTTCATCAAACCCACGACTGACA  
TTGCAAACCCATTTACCACACAATTCTTTATGTTACAAAAAGTGATAGGATCTATCTGTCTCTTTAAGGATATCTCT  
GTATAGCAGTTACAAAAGCAAACCTTCCAGGCCAACAGAATCATCACCCCTCATGAGGTATTTTAAAATATGAGTTC  
AAGAAGAAGGAAAATGCAATGCAAGTTAATGTTCTTGATCCACATCCCTCCATCTTAAAGCCATAGGGTGGACCC  
AGAAGTTTLAGTCAAAGTGTAATTTACCTATACTACAACCAACTGTGATGATTTCTAGCCATCTCCAGTTTCAG  
TGTGGTATTTAGTCCCACCATCTGCATCACAGCATATTGCCTAGTGTGAAATAGTGCCAGCAGTTGATTGCAAACCC  
CACTATGCGTTGACTTGGATGTAATAATGAGACATCTATGATATAGACACACTTGTACACACACACATACTCACAGA  
AAGAGGCAAGAAGTAGAGGAGCTGAGTCTTAGGATCCCTCAATGAAGAGATAGTGGAATCTTGTAAGGCAGAG  
AGGTCATTGAGAACTGTATGTCTCTATCTGCACAAAATCAGGCCAGTCTGCCTTCCATCAATGAGTGGTATGTTCT  
CACTATCCATCATCCCCATCTGAGAAGGTATGGACAGTTAATGAAAGATGGAGAGTCAGTTACATCAAAGGTATG  
CCCTTTGAAGTTATAGGTTGGCCAGGCACTACTGGTAGCTCCATGTCCAAGAGTTTATGGGCAACACAATTGATT  
TGAATGGGTTGTATCAAAGGGGAGAAAAGGAGACATGAAGTTGGAAGGAGGATTAAGGTGGGAATGGATCTGG  
TTTTGGTCCGGGAGTAGTTATTAAGAGAAGTAAAAATAAATCCATCAAATAACATTGTATGAATTTCTCAAGGA  
ATTAATGAATGTAGTCTTAATATATAATGTCTGTACTGAACATATACAGACGACTTATATTTCCATTTCTAAATAA





TTTGAGGCTGAAATGCCATGGATTTCATTACAAATTTTCTCTCTAGAATAAGTTTGTATGCTGCAGCACTTGAA  
AATACTTTCTATTGTTGATTAATTTTAATATCTGGGAGAGTTTCTGCAGTAACTGATTCTCTTAGTTAGGGATTTGTT  
TCTGTGAAAAGACACCATGACCAAGGCCACTCATAAGAGACAACATTTTCATTAGGGCTTTTCTACATTTAATTACAC  
GTTCCAGAGGTTCACTTCACGATCATCAAGGCAGAAAATATGGCAGAGTCTAGGCAGACATAATGGTGGAGAGGA  
AGTTTAGAATTATGCAACTCCATCCAAATGCTTCCAAGAAAAATATGTATTTTGCATGCAGGTATGTTCTGATTCA  
CATTGGGCAGAGCTTTAAAGACCCAGAGTGATATGTTTCTCCAGCAAGGCCAGACCTATTCTACAAGGCCACAC  
CTCCTCATAGGCCAACTATATTTAGAATGCCACACTGGTTAATAGCAACTCAACAAGATCTAGAGTCTTCAAAGAG  
GAGGAGCTTCAGTTGAGAAGATGCCTCCATAAGATCCAGCTGTTCCAGAATTTTTTTAATTGGTGAGAGAGCACCAA  
CTCCATTGTGGGTGTTGAAATTCTTGTGGTGGTACTCCTGGGTTTTTTAGAATGCAAGCTAAGCAAGACTAGAGG  
AGCAAGACAATAAGCATCACTACAACATAGCCTATGAATGAGCCTCTAATTCGAAGATCCTGTGTTGTTTCAGTTTC  
TGTCCCAACTTTTTTGATGATTAACAACAATGTGGAAGTATAAGCTGAAAAAACCTTGTCTATGGAATTTGCTCTT  
TGGACATGGTGGAACCTTCAACAATAAAAATAGTAAGACATTCTTAAGGAAAAATGTCTAATAATGCCAATGTCA  
CTTATCTTAAAACCACAAATAATAATGTGCAGATATTTATTTTTATTTAAACATAAGATATACTCATGTACCTACCT  
GAGATGTAATTTTTCTAGTTTGCTTCTTCTCACAATGTAGAATATTACAATCAAAAATAACTTGGAATAGAAGGG  
TTACAGACTATACCAAGGAAGACAAAACAGGAAGTTGAATCAGTAACAGCAAACACTGCTTATTGGCTTGCCACT  
GACTTAGTCACTGTTCTATTGCTGTGAAGAGACACCATGGTTAAGGCTACTATTAGAAAACAAAGCATTAACTGG  
AGGCTTGCTTACATTTTTAGAAGTTTGGACAATCATCAAGTGAGGGACCCCATCATTGGAGCAATAGAGAACTATT  
GATCCTTAGGCAAAGAGAGAGATTCTGCCATTGCAATGCCTTCTTAAAACCTCAAACCCATCCTTTTTGACACACC  
ACTTCTCCAATGAAGCCACACCTTATCTTATTCCATCTAATCTTAAAACCTCACTGTCACCTCCAGTGACTAAATATT  
CATATATATGAGTCAATAGAGAACGTTCTTATTCTACCACCAATTTTCTATGGCTTGATCAGCCATTTTTTAAATAC  
AATCTAGAATGCTCCCATCTATAAATGACTATTGATGAGCTTAGCCACAGGGATGGGCCCTCCACATCACTCATT  
GCCAAGAAAATATACTATAGACTTACCAAATAACCAAGTGAATAGAGACAGATCTTCAATTGTTCTCTCTTCTTAGG  
TAACTGTAGATTGTCAAGATTGAGAAAAATAAAGTCCCATCACAGGAATGTTTCACAGACTCAACAACCTACCCA  
AACATTACTCAACAGCATTTCCTCCCCTTGGCCCTGCATAGACCAATTCATGCATTGCATAAGTGAAGGATAAC  
TACGTTTATCAGCAATGATACTCAATAAGAGGTGACATGAACAAATATTTCTATAGCCACACAACCCCCACATTCT  
AATATGTCTTACACTTACTGTGCACTTGGCAACCTGTCCAATTTCTGCAACTCATTAGACAAAAAAGAAAA  
AAAAATTCCTCATAACGAAATCCAATGAATTTTACCTGATTTGTTTCTCCTGAGGCAACTCGGTGTTATCTCTTCATG  
CTCATATTCGTGTCTGATTATCTGTAATAAACCCTACTATTATCAGCTACATCAGGTATGATGAATACC  
AACTCCCATGAACAGCATCACAGTAGGCTAAGCCTTTTCTGCAATTTTGAAGTTTCTTTGTATACAAAAATCAAT  
TGATTTTATTAAGTGTGTAATTTAATGATTCTAACACATTTTACCTCCCTTCCATTTTTCCCTCATTTTCTGATACTC  
ATATGATATTGCAATCTATTAATAACAGTAGTGAATGCAGAGGAAGGACCAGTGTGGGAAGCAGCAAAGTTCTT  
TATTTCTCAGACAACGGATACACTGCCAGAATCTCCAGGTACAACCTGCTTGGTAACTTTGGGTTAATGTTAGCAT  
GAAATTTCTAGAAAAACGCTTAAAGAATTAACCATGGTTAACCTGGACCAGACAAGTCAGTATCTCTAGTGAGAA  
ACATTCATGTAATCATTTTCATCACTGTTACAAGATGCCTAGCAACAAGGAAAACAGGTCCATGGTCACAAGAAT  
ATGAAAGGGGCATGAAGGAACACAGTTGTCCAACCTATTAGCAGCCAGTAAGCATCAACACAGGAAGCGACCAA  
AGATAATAAATAACTTCCAAGACATGTCCCAAATGACCAAGTTCCTTTACAAGTTTCTCACCCCTTCCATGCACACCC  
ATCAATCAATTAACTCATAGATTAAGCCCTCAGGGTCCAATCACATTTTCAAGTTGTGTATATTGTTCTACCTTTGAG  
CATTGTACTTCAAACAAAACCTTCATCAAAGTCCCAGGACAGACATTTCAAACCCATTTCAACACAGCATTTTTTGT  
GTTACACAAAGTGATAGGAATCTGTCTCTTAAATGGTATCTCTGTCTAGCAGTTCCAAAAGGAAAATGTCCAG  
GTTAACAGCATCAGCACCTCCAGGAGCTTTTATAAATGTGAGTTCAAGAAGAAGGAAATTGCAATGCAAGTTAAG  
GGTCTTGATCCCCATCCCTGCATCTTAAAACCATAGGGTGGACCCAGAAATGTAGGTCAAAGTGTAATTTTAC  
CTATACTACAACCAATGTGATGATTTCTAGCTATCCCCAGTTTCTGTCTGTTACGTAGTCCCAACAAGTCTGCATCA



AGGAATATTGCCTAGTGTGAAATAGTGCCAGCAGTTGATTGCAAACCCCACTATGTGTTGACTTGGATGTAAAATG  
AAACATCTATAATATAGACACACTAATACATATACGCATACTAACAGAAAGAGGCAAGCAGTAGAGGTGCTTTGTC  
TTAGGAACCTCAAGGAAGAGAAAAGTGAAATCTCATAAGGCAGAGAGGTCATTGAGACACTGTATGTCTCTACT  
GCATAAAATCAGACCAGTCTGCCTCCATCCCTGAGTGGTACGGTATCACTATCCATCATCCCCATCTAAAAATGTA  
TGGACTGTTGATGAAGGATGGAGAGACAGTATTCAACAAAGGTAAGGCCTTTGAAGGTGATATAGTTTGCCATG  
CTCTACTGGTAGCCCCATGTCCAAGAGTTTATGGGCAACACAATTGATTTGAATGGGTTGTATCAAAGGGGAGAA  
AAGGAGACTTGAACCTGGGAGGAGGATTAAGGTGGGAATGGGTCTGGTTTTGGTCTGGAGGTATCAAGAGAATT  
AGAAAGTGAATTCATCAAAATATATTGCATGAAGTTCTCAAGGAATTAATTAATGTAGTTCTTAATACTGTACTGA  
ACATATACAGACCACTTATATTTCAATTCCTAAATAACATCTCCTTTTATAGCACTTACATTACATTAAGGGCAAAA  
GTAATCCAGAGATTATTTGAAATAAAGAAGGATCAGGGGTATGGCCAGAGGCAATGCCATGTGTGTTTTCAAAC  
ATTCACCTACAACACCAGTGCTTAGGATTTTGGGAGGGGCAGAGACAGGAAGATGACTGTGGCTCCTGAAAGCC  
AGCCTCACTACCAGCTCAGCAACAAACCCTGTACAAGGGGATAAATTAGGGAGTAAAGTAGCAGAACACACTACA  
CCCTTCCCTAGCCTTTGAACTTACCTGTACAGTTCTCTATGCAGACACACATAAATATGATTAGAATATACAAGAGG  
TTACTTTGCATAGCTTATATGCAAATGCAATGTTGTTTTAGTCTTCAAACCTGAGACTTTATATCATTAGGGTCCAG  
AAGCAAACACCCCAAATATAGAGAATAGATAAATCTTCTTACTCTGCAAAGGAGACCTCAGTTAAGTGTGTGTGTC  
AGTGACACCAAAGGTTTCTCCTCTATGTTCAATTTATATAGCATAGAATGATCTGTAAATAATGAAAATATGAAAA  
CAAAGCTTTTTACAAATTTTAGGCTTGTGTTAAAATCATATTTATAACATTTTATTAATGGAAGTGAATCTTCAGC  
TCTCAGGAACAATACAGTCAATCCTATAGGCTTCTGTTTTGTCCATTATCAACAAAATTAATTGCACATCAACTGG  
TCCCACACTTTTAACTAAGTCAGGGAGAAGGGCTATGTTCCGTACAATAAATAATGCCAATGTGATTATTCAAG  
CAGAAATCTGGCAGGGTTAGGATGCCTTTGGGTTATGTGATAGTGACTGATTAGTCTCTTTTTGTGCAAATAA  
CCCTAACCTCTGAGAAAAGAAAAGTAATGATATAAAATATACTACGAAGTGACATGGACACTTATTACTAGATTC  
ATTTTCTTTACATGCTTTGTTCTTTGAAAATTGTGGCCCACTGAAGCTCAAACATTCAAAGGTGTTAGTTTTCCA  
GGTGGTGAGATGTTAAGAAAGATTTAGGATTTGTATTTTTATTAAGGATATTTGTCACTATTTTTGAACTATCAA  
AAAAAAAAACCAAAAAAAAAACAAAAACAAACAAAAAACAACAGGCTCTCTCTCTCAATCTTTCTCT  
CTCCTATTCTCTCTCTCTCTGTCTCTGCCTCTGTCTGTCTTGTCACTCTGTCTCTGTCTCTGTCTCTGTCTCT  
TCTCTCTCTCTCTCTCTCTCTCTCTCTCTCTCTCTCTCTCTCTCTCTCTCTCTCTCTCTCTCTCTCTCTCTCT  
CTACTGCTCTATACATGTGTGCATGCCTGTCGCCATGGTGTTTACCATGATGTCCTGGAGTCGCCCTCTGAAACTGT  
AAGACCACAATTAATATTTTATCTCACATCAATAGAACAGTAATCAAGACATCCATATTCCAGTTTATTTTTTCAAT  
CGTTCTGTACTTATTTCAATAAAGTTACCTTTTGTCCATTGAACAGTTTTAAGAATACTTTAAGGTCCTGAACAAA  
TAGTGCCAGTAGGAGTGGCACTGTTAGGAGGTGTGGCCTTGTGAAGTATGTGTGACCCTGTTGGAGTAGATGTG  
GCCTTGTGGAGGAAATGTAATACTGTGCTTGTGGACTTTGAGATCGGCTATGCTTAAGCTGTCCCAGTGTGACA  
CACAGTCTCCATCATCTACCTGTGTATCAAGATGTAAAACCTCTCAGCTCCTTCTCTAGCATTGTGTCTGTCTGAATGC  
TTCCATATTTCCAGTCATGATAATAATGGATTAACCTCTGAAAATAAGTTACAAAAGTGTTCAGAGTTACTGTGAT  
CCTGGAGACTCTTACTCTTTCTGTCTCTGTCTCTGTCTCTGTCTCTGTCTCTGTCTCTGTCTCTGTCTCTGTCT  
TCTCTGTCACTGTCTCTGTCTCTGTCTCTGTTTATGTCTCTGTCTCTGTATCTCTCTCTCTCTCACTTATTCTGTCT  
CTCTTTGTTTGTGTTTGTGCTGGTGTGGTCATGATGGCAATAAAACCCAAAGTAACACAAACACAAACATTCAA  
AACACATTTGATATTTTACTATTCTTGCCAGGGAGTGGCACTACTTGGAGCTAATAACCTTGTGAGTAAGTT  
TGGCCTTGTGAAAGAAATTTATCATTGTGAACATGGACTTTAATGCCCTCTGCCAGCTGCCTGAAAGCTACACAT  
TTCCTAGCACCTTCAGATGAAGATGTAGAATCTCAGCTGCAAATGCACATGCCTACCAGGATCCTGCCATATCC  
CACCTTGATGAAAATGGACTGAATTTCTGAACCTGTACGCCAGGGTAAATTGAAAAGTGTCTCTGCTGATAGTTGG  
TTGCTATCCAGAAAGTCCAAAAGTTATGACGTATCATCTGAGTCTGAGAATACACTGGTTTAGCTTCTAGCATT  
GACAGAAAACAGGATTATCAAGACAATGAGAGTATAAATCTTCTATTTATAGAGACACATAGGTTATAGATCTG

TGGAActCAAGGTTTCATGGGTGGTATGGTAGGGTGATTAGTGTCTGTATATGAGTGCAGTTTCTGTTCCCAAGTC  
TGATGTCACACATACACATATGTTAAGTAATGTGTAGAATGTCTTCAACACTTGCTCTCTTAGAGTGAAACCCTGTC  
ACCATTTTGACTAGTTTGACTGGCCAATACACTATTGGGATATCTACCTGTCTCCACCCCAATGTTGCAGATATG  
AATAGACATGCCTGGAATTTACGGAGTTGCCGAGAATACATGAACTCCACTGAGCCATCTTTCTAGCCCCAGCA  
GGGTATTGTTTATTGAAATCAATGATCATATCAGTAGAGAAATGAAAACCAACATGACCCTGATATTCTACCTTACC  
TCCACCTAACACCAATAAGTGAATGTTAAATATAAATTTAATTCGTGTCAAATAAATCCAGATTACAATCTAATGA  
ATGATAAAATTGGAGTGGATCCAGATGAAAGCTACGTTAGTAGATTTTTGGCCTTTTATATGAAGAATAACCAATA  
TTTTGGGTACTAGGAGAGCAAATGTGTGTAATGATTCGAATGAAAGAAAATCTGTGTTCCAGTGAATTTTATT  
TTAAATAAATTTCAAATCATGAAATTTCAAATATATATATATATATATATATATATTTGTGTATGTTATTATGGGTTT  
GTGAGTTTTCTGGATTCCGATTGCAGAATTAGAGTATAGGGGACCTGGTTACGTGGCATTATTATTTTTTATTAAT  
TAATTCATTATTGTCCACCTTCTACTGTTCCACATCCCATATCTACTGCCATTCCCTGTCTCCAAGGGCAAGTCTC  
CACCTACCGGATCTCTAAACACCTTGGTGTCTCTAGTTTGTGAGAATTTGGTGCATCATTTCTGATTGAATAGAG  
ATCAAGCAGATTTTTCTGTGTATGTTTAGAGACCTTCTGATAGTTCGCATATGCTGCCTGTTGGTTGTCTAGCA  
TTTGGGAGAActCTGGGTCCATAGTAGTTGAGACAGCTGGTCTCCTCAGCCTCCTCAGTCTTTCTCAAATTAAC  
CAATGGTTCAGCAGATTCTGTCCATTTTTGTTCCATACATTTGCATCTGATTGTTTACCTGCTCATTATTTCTTCA  
TAAGTACAGTCATTCTAGCATTCACTACAAGTATCTGAATTCAGAACTACAGAGGCTATTTATTGCAAGCAGG  
TCTTCTGCAAAGCAATATACAATATAAGTACTAAAATTTCTATCAGTGCTCAACAATATTCTATTCTTTGTGATGAA  
ATCCCTCTCTCTCTCTCTCAATATATACTTCTCTAACACTTAGTATGAATAAAGATTCTCTTAAATTTCTCTCT  
ACAAAGGGGATGATATTGGCATGTCATCTGCAACATTCACTTCTTCTACACAGTTTGTGCTTTTTCTTAGCAATC  
AACTAATATCTAAATCACACATGCACTCAGATTACAAAATAAGGTATCTGAGCTAATGCAATCTGTTATTCTGAGTC  
AGAGTAGGGGCAGGACAATTCAAACTGTAGTTACATCCAAGAGCATGGACTTAAACAATTGTGAATCAGTAGA  
AGACAAGACAATGTATAGACGCGTTGTTCTTTGGTTGGTTGGTTAGCTTTGCTTATTTAGTTACCCACAA  
TCATTATAAGAAACACAGAGAAACTGATTAATGCCTGTATCTTGAAGTGAATGCAAATCGGGGCCCTAGAACCA  
ACATTATATTTCTGTTACAATATACAGTATATTTTTAGAGATTTTCTTTTATTAGCTATCATACACACACATAC  
AACAAGTTAAGAAATGTTCTAAATAAATGACCCAAATAGCAGCTTAATGATTGAGATGCAGATATTTTACCCAA  
TCAATAGACTGAAGCATCTGACCCCTGTTGTTGAATTAATGAGGTTGAAAGATATTAAGAAAAAGGCATTCCTGT  
AGTAGGATCCCTGTCTCAATTAACCTGTTCCCCAAGATGTCTGAACTCTGGCCCAACAAGAGACAGAATGCAC  
CTGCTGATATGAGGCCTCCAACACACATACCCATCCTTATAAAAAGTGAAAAGCTTGAATCTTTCTTATTAGAGAT  
TATACATTTGATATACTTCAAAGTCATAAGAGAATGCTTGAGGATTCAACAGAGCATATCTAATTTCACTTTTAGTA  
TAAAGAAAATTGTCACCTTCTTTGGTCAAATACAGTAGTTAATGTTCTCCCTTGTAGATATACCAAGATCTAAGG  
CCATATTTGGGGAAAGGAAAAGACTGAAGCTCACTGAGCCTCACACAGGATAATTTCTTGGCCACTTCAAAAAGC  
AAGGAGTGCAGAGGCATCTTGGGAATAGAAGACTTCTGAGAACCTTCTCAGAATGAGACATTCTAAGACCAC  
AGTCAACAGAGGGGAAATCGTGAAAATCTTGGATCCTAAAGTAGAGGTCCAAGTCTTATTTTCCAGGTTAGAAAT  
GTCCAGTTCAGCTATGGTCATCATGGGAATTTCTAGGCTCCACTGAGAACTGTAAGACGATTGAGACTCTTCTCA  
CTAGCTTCCAAGAATTTTCCCATATACATACCCTGTGTAACAATTTGAGTGTCCAGGCAATGGTCAACAATCT  
CCCAACATGATAAATAGTTATGCATGAATTGATGTTTCCGCAAGGCTGTTTTAGCTGCACACATCTGTGAATAAAA  
GATACGAATGGGGCATTGTGATGACCAATTTGAGGCACAGGATATGGGAGACAATTTAGTTTTCTATTTTCTGC  
CCTATCATCTAAAAGGGGAGAAATGTGAGGTGACATTGTTTACATATGTGTTGTGTGGATATCTTGGACAAATGG  
GATATGTTTAAAGAAAATAGTTGATCGGGTATTTGTGAGGCAAATCCAGTAGAGAATCTATGCTGGTTCTTTA  
ATTGCAGAGGTGGATCTGAAGTGTCTAGTACAGAGGGTGGAGGTCTGAAACTCCCCTTCTACACAGAAGCTACT  
TCTGAGAGTCTTTCAATAGATTTTGAATTTCAAAGGCCCTTTTGTGAAACTGAATGTTTAAATCCACTTGGTA  
AATGGAAGTAGACAATAGACCCATACTCTACTGGGAAGACAGGGATTGTTAGATGCCCTTTTATGTAGAATAAGT

GGTATAAGTCTCCCATGGTCTAAAAGCCTTTTAAGGAAATAAAGGCTCAAACACTACATGGTTGGAATAGGAATATT  
CAATGTAAGGTATAATAATACATGTTTTGGGCCACACTTTGCTAATAGGTTCTAGGGCCTTGTTAGTCCTAGGAGA  
GTTGTGACATTATATTCAGTTTAGTGAGAAAAAGTAAGTTAACATTGGAAAATATGAGCCCCATGTAGGAAAGGA  
AATCTCTGAATCCCTACTGCAAGAGGAGGACAGAACTTCTTGAGGCAGACTGTGACGTTGCCATATAAACTTCTG  
TCCAAGGTAAAGGTCTCTGGTACCTTATACAGTGGAGTATGTTTCCAGCAATGATTATCAATTTTCAATTCTTATTCA  
GAGTTTTTTTTATTTTTTTTTATTTTCATAGTTTGTGTTCAATTGAGGAGATACACGGAAGCAACATATTCCTTCTTCCAA  
AGGCTTTTGGAGACTGTTGCTGGCTAGGATACTTCTTTGACTTTATTCAATTATCCAGGTCTAAGCAGAATTAATGAA  
GTTATTTCAATTTCTATTGACTTGTGTGGAACAGATGGCACAGGTAAGTTGATCCAGTTTGAATATCACTATGGGA  
CTTCACACCAGAGTGAACACTAGGGTACCTGTTTACAGAAGGAGTCACTTTTGGAAATTTTCTGATAAGTTAGGGAT  
AAGACTACTTTGACCATATATAGGAATAACATTTTTGAGAAAAGAGAATATGTTGGGAGGATAAATAAGATAAGAA  
AGATCACAGAATCCCTCAGGCAAATGTTTATCTTTGGAATTTGAAGAAGATGTCGAAAACAGCTTATCAAGTGCAA  
ATGAACTCACAATTCAGAATACACATGTGTTCTGAGAAATTAAGGTGTGTTTGCCAACAATCAGAGCATTTTTTCTTA  
CGAATTGTTTGGTAACCTCTTGCTCTATGTTCTGTAAAGCAGCATGCCAGGCATAGCCAACAAAGAGGGCACTG  
CTCTATTTCAAGTGACAGGCTTAAAAATAGAAGTTAGGTTAGGGCTTATATATTTACTGTATGTCTCAGGACATCA  
TTTCAGAGTTGCTTGACATCCCTTCTTTATTTGAGCATGCCTGGCCACCCAGGAAACATTGGAAATTTTAGGAACTC  
CTAGACTAATAGTCTGAGGATTCTATTAAGACAAGTAAATTTTCTGAGATATGCATGGTCAAGAGATGTTGATTT  
AAATTTTCCACAAGCGAAAATAAACATCACTTTAGTTTTCATGTTAGTGGCTTTTTCAGTAGGCTCCCTAAGCAACA  
AAATTTGTATTAAGACCTTTTCAAACCTGAAGGGTGTGTCTATATTTCCCAATTCAAAGATAAAATGTAAATTTGTT  
CCTTGTGAGAGTATTTACGTCAAAGATTCTTCATTGAAAAGTTTTTGAACCTAGAGTTTACCTTGAACCTGAAGGGAA  
AATCTGGGAAACATTAGTGTATATATTTAAGGTTCAAGTTTCAATATCAGTAAGTTGTGTGGGATTCTCGACCTAA  
AAGTATGTCCAAAACCTTTTGGACAAAACCTGGTATAATCAGAGACTCGCTTTGCTTCAGGGTAAGATCTGATGACT  
CCTTAATCTAAGACAGATGGAGTAAGTATTACTTGGGGAGAAAAGGAGGTGGTGTGCTTGTAAACAAGAGAGAT  
GATCAGAGTATGAAAATCTCCATAATAGTTTGTACAAAAAATTGCTTACCTTAACTCATAAGGTCCTCCTTTGCCAC  
ACCTAATGGTTCTTCACATTCTGGAGTATCCATATCTTTAGCAGAATTAGCAAGACACCAAATATTGATACCATGAT  
TCATGAAAAGCTTGAGCTACTGTCTTCAGCATGATTGCATCCTAAGAATTATGTTCAACCACCAGAAGTGTGTTAGA  
ATGATGATTTTACACCATGTGACTGAAGTCAAGGAAGTGGCATAAGGTCCCAGGATTGGCCTCCTCGACTT  
GATTTATCTGAAATGTGACCAGAGGGAGAAAAATGCTCCTTGTGAGAGGTAAAATATCCCATGGGTTCCCGAACA  
GAAATTATTTTTATGAGAGCCATTGACTCAAAGGGGTGATTTTTAAGACCTCAATCATCACAGGAAGGGAAACA  
CCATAACTGTGGAATCAAGTAAGCCCCTTGATCCTGTTGGACAGTAGGGGAGTAACTGTTTACCTTCTGTAGAG  
GAGGTTGGACCAGGCACTCCTTAAATCCACATTTTTCAGAGAAGTCTAGAAAATTCTTATCCCTGAGGACTCTACTGC  
ACAGTTGACAGCACTCTGAGGTTTGTCTGACAAGACTGCTCAAAGTTCTGGATCTGTTCCCTATTTATACTTACA  
ATAGGCCACAGAAGTATGGGTGTTGACGACAATTACCTTTATGATGAGCAACTTAAAGAGAGATGACCTTGGATC  
TAGGCTGAAGTTTTTATTCAATTGGCCATGGGACTTGAAACCAGACTTCTCTGAGTTTATTGGTATTGAAAGGTGTAT  
CCCCTAAACAATAATTTCTGAGAGAGAATCTCTGGTCTATATTAGTTGAATGGTAGACCTGAGTAAGCCATGAACA  
AAGAGTGAACCTCCTGTGAATTTCTTGGTACCAACGGTTTATGTTTTAAGCACACCAGATCTGTACTTGAATGTATGA  
GACACACTCCTTACTCTCAAATGTCAGTTCTATACTTTCTTCATCAGAGGGGCATGCCTCAGACCCCTCCAGTGCAG  
ACAGAGAAAGAACAAGTGTTTTTATTCAAGGTGAGCAGACCCCTTTGTCATATCCTTAAATGTGAGGGACTACTAT  
GTTTAGAGGAAGTAAGGCTAAGGCCTTCTTCAAAGATAATCCAACCTGGGGGTGAGCCCCCTTGAATCATGGGA  
TACTTTACTTCTAAGGTTGTGTGACTTGACGGAGTTGCTATTTATGCTTGAATATAAAGTATCCCGGTTCTGGTGG  
GGTACATCTGAAGCCCCATTGTGAATTCATCAATGCTATTGCATGGTGTATTAAGAGCCATATTTGTGGCCAAA  
TTAAGATGTTGTTGAAGTCTGAAGTCTGCTTCTCATGTATGCTCCGGATATCTTCATTGAGGACCTATA  
TGACACCTTTGTTCTGAAGTGATAATTCTGAGGGCAATTAAGAATGTCTGAAAATTTGGTTCTCATGAGTCAATG

CAGCCTTCAACACTGGTGAGTTTCTAACATATTTGATGTAGAATGGGTATGTCTGAACCACTGTTAGGTTATTGAA  
GGAAGTTGTGAGGCACATATATTCAATTCATGTATATGTTTGTACTGTCACTGCCTTCAAACACACCATAAGGTGG  
CATCAGGTCCCATTTTAGATTGTTGTGAGCCACCATGTGTTTTCTGGGTTTTCAACTCAGGACCTATGGAAAAGCAT  
TCTGTGCTCTAACTGCTGAGCCATTTTTGCAGCTCCAGCACATTGGTTCTAGACAGCTTAGTTAAGGTCACCTAG  
GGAATTGGGTAAAATCTGAGAATACCTATTTAGCATGGGCAGATCAGAAGACCCTTTGGTATACAGTATTTTGGGA  
TGATCTGTGGTTCTTAAGCTGTAAGTCTAAAAATTAATAGAGAAAAATATCTGTATTTGGATTACTGGTTTAGAGCA  
ATTGCACCTCACATATCCTTGAGTCATGGAGAGTGCATTACACCCCACTTCAAGCATAGGGGAATACATCTTAGGG  
TTCTCTCAAAGAAACACAATTTGGAGGACCCTTTGAAAGGAGGAAAAATGTTGATTTATCCACAAATAACCTATTA  
AAATAGCATCCATTAGAGGTAGAAAGTCTCATACCACATTTGGGAAAGCAGAAATATCAAACACTCTTGTATCTTTT  
CAAGATAAAAAGTCAATTTTGGGAGGAATATTTGGAATATTTTATTATCGAGGCTTCTGGGAACCCAGAATATGA  
ATATCATGCAGGCCATGCAACAGCATAATCAATCGTCAGTATGCTAGGAGGAACTCCCAGCTATTTCTCTGGTA  
AATCAGCTGCCTACTTCTGAACATGGCAAGGCTTACTGTTTCTACTGGACAACATAGAAGTATATGTCCTGGGTTT  
ATGAAATTGCTGGCTACTCTTAGACTCCAGCCATTGAAGCAAATGGGTCCAGATCCTTGGACTGAGGTAATGAGGT  
CAGAGGATCAGAAAAGGAGCACTCAATGCACCGTATATCAAGGAAATCGATTTGTCATGGATTACATCAGATCT  
AGTTAGTCTAGGTCCTCAATGATCAGAAGAAGCACATACTATTCTACATACTATTCTACATGAGCTGGAAATTATAT  
AGCTTATGGCTACAAATTGTTAGATACTCTTAATCAGAAGGGAGGTTTGTGTTGACTTTTAGTCCAAGGGACATAT  
GTGATGTTTCAATGTGCATCTGAAGCAGCTAGGAGTAGAAATTGTAAGATGTAGAGATGGTTGATGAGAAGTTAA  
AGTTCTAAACTCATGTTGCTCATAAGGGGCAAAGAAAGGGAAAAACAGGGCACCTGTGGGTCAAAAAAAGAAC  
TGAAAATGCCAGGGTAAAAGAGAGAAGGGCACTGGCCACCCTCTGAGAAGGACTGCCTTACAGGATCCATTTGG  
CAAGCTGTAAGTTCTGGTGTGCCTTGGGTCAAAGGAGTAATTCGGGAGTGAGGATTAAGTCATAAGCTTCTAG  
AGCATTTATGATATCTCTTTTTTTCATAGAAAGCATCTGTGAAGCACATTTTTTTTAGATTGGGCATTTGAGAGCCTGC  
CTCTTTCAGGCTAAAGCATTCTGAGCCTTACTGAAAGAGGACACATAGCCAATGTCCCTTTGGTGAGAACTGAAAA  
GTCTGAGTTCACAATGCTCAGACTGATATGGTCTGACTTTCCCTTTTGGGGAGAAGAAAGAACTACAGCTCCCCTT  
TGCTCCGTGATCCTTTTGAATTGATTTGATATGATGTATATATTTGTGGCCTCCTAGGACAGAAGGGTCACAAAG  
GGACACCCAAATTCACATTGTAATGATTGTTTTCTCCCTGGGCAAGAGAGCAAGTATCATGTCCTGTGTTTGGAG  
ATGTTACGTGTAATTACTTTGCATAACAGGGAATGAAGTGGCACCTCCATTTGGAATTCATGGATGTATGAATCCC  
ACTAGGAAAATAGCCAATGCTGTGGGCTCCATTTTTGTATTAATGGAAGTTATGTGTTTCTCTCTTTGGCAGTA  
GATACATGTTTTGAGCACTACTTAGTAAAAACAGGGTGGTTGATATCCTCTTGGGGTGTGACAAGAATTTGACAC  
CTCTATGGGGACTTTCTCCATCTGGAGATAACTCAATGCCTTCTTGTCTGCAGGAGAAGTTTACAGGGCTATTTGG  
GTATTAGAGGCACTACTCTCTCTCTCTATTAAGTAGCATTTCAGAGAATCTCATGAGGAGACATGAAATGTCT  
GAGGCTCTTTCATGAGGAATAGGGTGGTTTATGTGCACTTTTCTTAGGCATGGATCATGGTTTGGCACTCTCATG  
TTCTGAATGGGAAGCTTGACTGTCCATTGTTGAGAACGGTCTTTTTCTGATAAGATAAAATAGATTTGGATGGTCT  
GTATTCACCTTGGTATGGTGGAGGACTTCTGAGGCCCTCCTCATGAGATGGTGAGCATCCAAAGGCTCCTTTAGCA  
GTATCAGAAGTAGTGAGGGTTATGGTAGTCACAGTTTTAAGATTTGCACTTTTTTCTTAGAAGTGCAAGATCTTA  
CCAGCATTTTGGAAATAGTGGCAGTGTTCACCTAGCATTTTTTAGAGGACAGGTTTACAGGCTGCTTGTATCTACA  
GAGGAAAACATTAGTCTTATTTTTGCGATATAGAATTTTTGGGACAACCCCTTGGATGAGGAGAATAACTGAGAT  
CTTTCTGTAAGGAATGCTAGATGTGAACTCAATTGTGAAGATTAAGGGGGAGATGCTTCTTGGAGGAGTAG  
AGGTAGGACTGGATTCTTTCAGCATACTTGAAGATGTGAGGCTACCTTTGGCAGAAGAGATGCATTTTAAAC  
ATCAAGTTCTGAGAGGCAGTATCTGATATCTCTTCTGAAAATGAGACATGTTTCAATGTCCTTTGGTTAGAATTGG  
AAGTACTCGGGCTCTTCTCTGATAAGAGTAACTATCTGGCCATCTTCATGAGAAGGGGTTGGAATTAAGTCCCTG  
TCTGTACAAAGTGACAGTCTGGGAAATTCTGTTGAAAAGGAAGTACCCACAGTGTCTTTTCTAGATGGCATAGGTT  
CTAGAATCCCCTTAGCTAGTTGAGAAAGTTCTAGATATTCCTGGGCTAATGTTGGTGTCCAAGGATCCCTTGATCA

GATACTAAAGGGCTCAGCCCATCTACATTGTGTTTCATAAGACACAGAGACCCTGGAACAGATAGCAAAGATTCTA  
GAGACCCTGCCACAGATTCTGAACTCTTAGAAACAGATTGGTTACATGGCAGAGATTCTTCCAACCTCTGGACTAAG  
TGTTGAAGAACTGGTAATCTGGGAGAATTTTATGTGGCTGACAAAGATTCTATGATCTCTTGGGTGACAGAAGG  
TATTTCTCACGGTTTTGCATACTTGGCATTGTTTCTAGTTTTTCTTCGCAGAATTAGAAAGTCCAAGATCTTAGGA  
TCAGATGGTGAATATCCTAAAGCCGCATTTTTCTAACAAGGTCTGGAGACTCTGGGATAACAAGGAAGTTTCTG  
AAGGCCGTTGGGCAGATGTTGATGTTCTACTACACCATGACAAGACAGGGAAGGTCTCTGACTCAATACGAAAG  
GTTGTGACACTCTCAAATATAATTGGACAGATAAAGGTGATCCTAGATGCACTATGGTAGATGCTGAAAATCCAA  
AGCTCTGGTGAATATTTGCTATTCTGGCTTGTGTTTTGTACAGGTGCAACCTTTCATATTCTCTCTAAAGGACA  
GGCAAGGGCCTCCAGCTTTTTGAACAGATAACAAGGTCTGGATTACGTGAACAGATAGGGACATTGTCAAAA  
GCTCTAGGGTAGATCATAGAGATCCTAGGGTTCCTGTCCAGATAAAGAAATTGCCATGGATCCTTTGGAAGAACC  
TGACATATCTGAAGCAGTTGGATCTGTTTTTGTACCCTTGTGGAGTATTCAAATACTCATTTGGTCCCTGGTATG  
AAGTCAAAGGCCCTCTGTAGTTTLAGAGAGATCTAAAGTTCTTCTGTGTAAGGAAAGGAATCAAAGGATTAG  
GGAAGAAAGTAATGAAATAAGTTGGGCAAAAATTGCAAGTGCCAGAAGTGAGTCATTGTATATCACATATCCTGA  
GATAGCTGTTGAATTTTTTTGTGCACCTGATGCAAATGAGGAATATTCTAGAGTCCCCTAGGAAGATGGCAAAGG  
TTCTACAGTGCCTTGTGCAGTTGCCAAAATACTCAGAGATTCTTGGTCAGATCTCAAAATCCTTGAATATTTTGTAG  
TAGGGTGGGTATATCACTGACACACTGAGGAATTTGGTGAGTCTGCTACTGTGTAGTGTGTAGATGTGGACTGAA  
TTCCTATACATTGTTATGTAAAGAAGGATTTGAGAGCTTTTGGGAAGTTGTAGATTGTTGTATATACCTTTGTGGA  
CATGTGGACAGATATAAGGTCCTCTTGCAGAGAGAAAGGGACTCAAACCTTCATGAGAATAATCAGAAGATGCT  
GGAGTCACTTGTTAAGTGGA AAAAGACCCAGAGGATTATGAGAACATTGAGAACATTGTGATGTATTCATCATTG  
CCTATGCTGAGATAGAAAAGTTTCAGAGTCCCTGGGCAGATTACAAAGTACTGGATTCCCTTGGCCAAATGGGA  
AGGTCTCTGCATCTCCTTGGTACAATGTTATTGTCTACCAAGTTTTGGAGGTCATGGTGGCAAAGTTCCTAGAGCTG  
ATGAAGTAGTCTGAGAAGATGTTACATCTTCTCACTCTTTGAAAATGTCCTAAAATACTCTGTGATTCTTTATATT  
GTGACAATATCCCTGTGAAACCTGTTGAATTTCTAGATTTCTTTGGTTGAAGAAAAAATAACTTTATATGCATAAA  
GTTCCCTCTTTGGCCCTGGAAATTTTTGGGGGCTTTGAAAAGATGGAAAAGCTTCTAGAACCACTGTAGGAGGTA  
CAAGATGCTCCTGAGAACCCAGTAGAGGTGGGCAATGTCCTACATCTGATGGTTAAGGACAAAAGTATTCTTGAG  
ATTTCTGAAAGGTAGGAAATGTCCAGTTTCCCTTGGGAAAGCTGGGGATTTTTGTGCAAAAATTTGGACAGTTGG  
CGAAAATTCATAACTGTCTGCAAAGAAGTTGGAGCATTCAAACCTATCTTGAGCTTATGAAACATTTTGTGCAGTCC  
ACTGTTTAGATGTGGGCAGTTTAGGAGACCCTTAGGCAGAACAGAAATGTCCAAAACCTCTGGGGAAAGATGAAG  
AACCTACAGTTCTTGTGAAGATGAAGAAATTTCCAGAGGCCTTTGATCAATTGACATAGATTCTGGTAGCACTTG  
AGTATTTTGCATAGACCCCAATCGTCTTGGGGTGGGAGGCAAAGTCCCACAGTCTGCTTTACAGATATGTACTTTC  
CTACTGTGGCTTGTGCAGATAAACAATGCCACCTCAGTGCCTGAGAATACAAGGAAGACCCTAGAATCATGTCTT  
TAGTTTTAGTCACTTTCAGACTTCTTTCTTGCATAGACAAGAATCCCACAGTTCCTTGCTCAGATCTCAAAGATGAT  
GGTGGCAGATGTAGTGATATAGTAAGATTGAGATGCATTCCAGCACATCTGGAGCTGTCTGAAGTCCCTCAGAAA  
GATGGAGAATATTCATTTGCTTCTGATTCTGCTGGAGAAAAAGCTGAATGCAGTAGAGCCCCTCAGCAGGTCCTG  
AGTGATGTGTCATTGCCTGGGCTAAGATGGAATGTGTCAGGCCCTTGGATTGATTGCGAATATACTTGATTCCCT  
GGAACAGATGGGAATATTTCTACACCTCCTTGTAGTAAAAAATGAATGTCTGCCAGGTTCTTGTAGGTGATGATGG  
CAAACCTCCTAGAGTAAGCAAAACAGATTTAGAAGATCTGACATCCTCTTCACTCTAGGCAAAGGGCCCATGGTA  
GTCTCTTTGTGTTTACATTGTCCCAATCCCAATATACCTGTTGAATCAGTCGAAGGTTCTGGATACCTTTGGATGGA  
TGACACAGAACTTTGCACATGCAAATTTCAATTGCAACTGTGCAATTTTTCTTTACCCTAAGAAGTTAGCAAAT  
GTTCTACATTTACAGTGATAGATAGTGGATATCCCTGACCACCTGGTGCAGATAGGTAGTGTCTGGATAACTTGG  
GAAATTCAAAACCTTCTCCTGATTTTCTGGCTAGAGAGAACATATTCATTAGTCTGTGGCTAACATGATGAGCATT  
GTAAGTTGAACAGATGGAGAAAATGTGAGAGCCCTCTAGTAATTAGATGGATGTTTGAACGAATTTGGTAGAGAA

GACAGAGTACCTAAAGGTTCTTGTTGGGTGTGTACAGAGACCCTTAGGCAGATAGAGAAGTTCCCAGAACCCTTT  
GTGCAGATGAAAAAGATCCTAACCTTCCTTCTGCAGGTCAAAAATCCCAGAAGTACTTGAACAGACTGGAAATGT  
CCTTGTTCTGCTTATCACTTTCTTTGTAACCTAGAGTCTCCGGGCTACATGGGAAAATTTCTTCAATCCCTGGGCAG  
CTATGGGATGTCCCTACATGGATTCTGAATTCAGGTAAGATTGTCCAGACACCTGAGTAGATGATGAGTGAATGA  
AGAAATTTGTGCAGATACATTCAGCTCAAGAGTTGCTTATGGATATAGGGAAGTTGTGACAAGTGTCCGCAAAGA  
TATGGAGGGGCTCGACTAGCTTGTGTTGGTGAGAAATGGCCATGGGGCTTTGGGACATGTTGCAATGTTTCTGTT  
GCCCTTAGCATACATGAAGACATTCCTCAAGAACCTGAGAATGAAGACAAAATGTTTATGAGTACACTGGGCAGAA  
TCTGATATCCCAGAATCTCTGGGACGATGATGACTGATCAAAGACTGTTGAGTATATGGTGAAAAGGCCTATAG  
AAGCCTCAACATATATGCTAAGTTTGGTAGATAGCAAATGTGCTAGATCCTGGGACTACAAAATAAGACTCCTGA  
GATCATTGGTCATATTGTGAATGTCCTGTATGACTTGAAGGATGTGGCAAAGGCCTGTAGTCCCTTGAACAGATG  
GTGAGTTTTCTGAGATTCTACCATGTGTGTTGAGTTCCTAGCTTCTTTGGAAAGATGCCGAATGTTCTAAAAAA  
CCCTGGGAAAGATGGCAAAGCACCCATAGTTTCTGGACAGGTATCAAGTGTCTAGAGTTGTTTTCTTACATCTCA  
CAGTTATTGAATTGCCTGATATAGTTTGCTAGTTTGTGGAAGTTTCTGAGAACATCATAGAGAAGTTGAGGATTTCT  
ACTTTCCTTGGGAATATGACAATGTTGTTGAGATTTTTGGTTTTGGGGTGTGTGTGTGTGTGTGTGTGTGTGTGT  
TGTGTGTGTGTGTGTGTGTGTGTGTGTGTGTGTGTGTGTGTGTGTGTGTGTGTGTGTGTGTGTGTGTGTGTGT  
TTTTTTCAGATGGAAATTTTTCTGACTTCTATTTTCAAATTTGGGAGTTAGCATAACCCCTGTAGGAGGCAAAGGA  
TCTGTAGTTCTTTGGAAACATGGCAAGGTATACAGATATTCTACTATGTATGATGAGTGCCTAGCTTCTTCTGGAA  
AGATGCTGAACGCTCTAATTTCCCTGTGGTATAACTAAAAACCCTAAGTCCCCTGGACAGTACAGATTGTTCTAG  
AGGTCTTTGTTTACAACCTGACAATTGTTAGATTTCTGTTGTAGTGTGAGGAGATGATGGTGGTGCAGATGATGAA  
GGTTTCACATTCCTTTGGAAGATAACAATGTTTCTTAGTTCCTGGGTAGAGGGAGAAGATATCATAGCCTCTGT  
TTCAGATGGTGGATGTCATCGGGTATCTTGCATAGATAGAGAAAATGTATAAGGCTTCTGAAAAGAACTGAAATTT  
TTCACAGGTCCTGGTTCAGATGGTGAATTTTAGAGTCTAGTTTCAGATTTGGGTAGTCCCATAGTCCCTTAAGA  
GATAAAGAATGTTTCTCAGCCCCTTATTAGATGGAAATATTTGAGCCATCCTATGAGCACCTGAGTAGATCCTAA  
AGGCCCTGTTTTACGTCTTGATGGTCTACAGTCCCCTGTGGTATATAGACTGTCTCAGAATGTCTTTTTCTATTG  
TATTTTGTCCCTTCTTTTGGGATGATATAAAAGACTCTAGGGTCCCTGTGCCAGTGTGACATTTGAAGAGTTCT  
TTGCAAATGGAAATACCTAGTGTAGATGGTGAAGAATGCAGAGTCTGTTTAGAAGGTGTGTAAGTGGGCAGTGG  
TCCTTGGATATTTACCAAAGTTTCTAAGGCCTGGGAAGAAAATGAGTAAATTTCTGAGCATTGGTGCAGTAAGT  
GAGTCTTTTCCACCATCCTAGGTAGATAGCAAAGAACCTTGATGCCCTGGCATGATGATGATGATGATGATGATG  
ATGATACCAAAGCCTCAGTAGCAATAGCAGGTAAGGAAATTGCTACAGGATCCTAGCCAGAGAGCATGTTTTTTG  
GAAAAACAGAGACATTTTTCAAATGTCCTGGAGATTTCTGAGGATATAAATATGTCCACATATCCACATCCACAGA  
TGGCAAATGTCTTTATAAACCTTAGAAGATGAGGAAGTTGCCATATCACCTGGTCAAGAAAGAGAATGAGAGTT  
CCCTGTTTAGATGTGGTGTGAGTCTGGAGTCTGTTGTGCAGTTAAGGATATCCCACACTCCCTTGAACAGAAGACA  
AAAGTGCTACACTTCATTCTGAGGATGAGGGTGTCCCTGTTGCCATTGGGTGAGTGACATTACATTTAGGGGAGA  
ATCTGAGTCATACTGAGATAAATCTAGAACTCCATGAATGTGGGGAAAATTTGATGGCATATCATGATATAATGGT  
GAAAGGCTCACAGGCTCTGAAGCCACCTGTTTGGGTCCAGGAGCTACAATGGCTGAAGGGGAAATTGGCAGGGA  
TCCTGGTCTAAGTGGCAAAGTTCTTACCATCTCTGGGCAGGTTGGCAGGTTCTGAGTTTACTTTGGAGAGATAAC  
AATGGTAATAAATTTCTTCTGAGTACTTGGTGAAGTAGCAGCTGTACTCTGGGTAGTTGTGGAACAATCCACAGGCC  
TTTGCAAGGACATCAAAAATCCTGAAAACCTCATGAGTTGAGATTCCATGTCTGAAACTCATTGTGCTGATGAGGA  
AAGATCCAGATCTCCTGGAAGGTGGAGTGAATGTCTTGAATAACTTTTTGAAGATGGAATATTTTTCTAAACACCTT  
GGCCAGATGACAAAGTTCTGTAGTTCCATGGGCACCCAGATATACTGGGAAAATCCTGAAAACCAAACACCT  
TTGCATAGGTGACAAAGTTTCTAGATGCCCATGGTTAAATAATGATGGTCTCACATATCCTAGAGCAGATGGTAAA  
TATCCTACAACAATAATGTTTTAGTCAGAAGCGTTTTTGTAGATACTTTAGAAGATATGAAAATTTTCTGGTGTGTTT

GGCTAAAGACAAGTTCTAGATGATTTTTTTAGATGTGGACTTCCCTCAGGCCCTTGATTTACAAAAGGAGATTGTG  
TAGTCCTGAAGTCTGATTTGCAAAAGGACAAATTACCTTAAGCATGGTCAAATGTTCTGCATCATTTGAGAAAGA  
TGAAGAAATTTCTGGGCCAGATAGTAAACACATAAGAGCCTTTTGGTTAGATAATCTTGAGCCTTTTGGGGAAA  
TATGGATTGTCCAACATGCCCTTTGGTAGACTGAAGATGTGAGACTCATCTGAGGAGAAATTGTAGCTTTTGATGT  
TTCTTTGGCATCAGGGGATGTTTCAAGTCTCCCCCCCCCTTTTTTTTTTTTTTTAGAAAATGTTCTGTAGTCTCCTT  
TGTTAGAAAGATCAAATCTTAACCTGTTTTTTTTCTTCTTATAAACTGGATGACTGTATTATTTGGTAGAGGGA  
AAATGTCTACTACTTCTACCAGAGAAGGCATGGAAAAGAAACACTCTTGGGTAGATGGAGATAATTGTAAAGCA  
CCTTGTTCAAATATCACAAATCCTATGACCTTCTGCACAGATGGGGAAGGTCTTAATATGTCTTTGTAAGTGTGCA  
AGTCTTAACCTTGGCTTTAAAATGAGGGGAAGGCCCTAGAGATACCTGTGTAGATATGGTTTCTTCTAGAGCATCA  
TGGACAAGTGTAAGATCTAAGAGCCTCATAGGCAGGTAGTGAAATTTCACTACCTCCCTGTCTACTAATGAAAG  
TGGCATCTCCTTAGAGCATCATGGATAGGTGTATAAGGTATAAAATCCCATGGGCAGGTAGTCAATTTCTGTCTC  
CTCCTTGTGTACTAGTGAAGTTCCAAGAACTTTTTTCCAGATGGAAAAGTGGATAACAACCTTCTGTATAGAATT  
TTCAGTTGTCATAGACAGCTTGGTGGGCAAAACAGCTTCCATGGGGCCTTTGAATATGAATTAGAACCAGAGG  
ATTTTTGGCATTGAAAATTTCTAGAGACTTATGCTGGCATGAAGAAGGACCAACAGGCTTTTGTGTAGGGGGGTA  
AGAATCTATAGTATCTTGTTTAGTTGGGGAAGAAGGCTGATCCTCCTGAGGTGATAGGGAAGATCTAATAGTCTCC  
TATAAAGTTTGGGGCAGCTCAAATTTCTGAATTTGGAGGGATGCTGAGGACCCTCTTCTTAGAGTTCAGAGTGT  
TAACTGGTATGGTGTCCACTCTAAGTCGCCCTTGAAGATTGAGAAGGTCTCAGACTGCCTGTGGAAGATGCTGA  
TGTTCTAGTTCCTTCTGTATGTGCAGAAGCGAAAGGCCTTTGTAAGACTCAGGAATTTCTACCACGTCTTGAG  
TATGTATGGAACACAAAGATCCTATTCTTGAATGGCAAATATCCTTGAGCTCCTGGTGTAGGTGTGGACATTTTT  
CTCTTCTTGGACTGATTTATTAGAGGTGTGAGGCTCACTTGGGACATTGTGATTGCATGTATTTCCCTTGGACTGA  
AATAGATGATGTGAGCACATTTCTATTGGTAGAGGACTTGAAGGCCTCTTGGTTTCATGGAGAATGACTGAAA  
TTCCCTTGGTCAGGAGGGTCAGGTCTCAAATAACTCTAGTAGGAACAGATTGCATAGGACACTTTGGGGGGAAA  
GAGAAACATCTTTGGATGTCTTTTGAAGACTTTGCTCTCTGCCCTGTTTTGGCAGCTGGCAAACATTTTCAACT  
CTGCTAGGGAAAGGATGTGGGACATGATACTTTGGGACAAATCACTGACATTACCCTAGGGGGAAAAGTTTAG  
AGCCCCCTTATGTGACTTACACTCCTGTTGTAGGTCCTTGTACCAGAGGGTCTTCTCAAATGCTTTGGAAGA  
AAATTGGAAGAAGAGAGTCATGTAGTGTAAATGGATAACCTTTGGAAGCCTTCTGGAAGAGCAGGCATTATGA  
TTTTACTGTCAGCACAAGTGAGTAGTCTTTGAGATGCCTGTGCAGATGTTCAATGTCCCATAGAGTATTGGAAAA  
TTTGATAGTTCCATTACCTCTTGGCTGGATAAGGAAAGACCCTGAGCATTTTGGGGAGAATTAGGAGATCCCAG  
ATATCCTTGGCTAGATCGGGAAGGTGTAAGGAACCTTGAATGTTTGGAGAAATTTCTGTCCATGTTGGCCAGTA  
GAAGAGTAGGCAGAAGATGCCCCAGGCACTGTGTGATCTTCTTTGAACTTTTTAATGGCATCTCCAGTACCGTGT  
TGGAAGATATTACAGGCATTCAGGCATCCAAGTGGTGAAGTCCATAGGTTCTTACCCAGTGGACATAGGCTGG  
CTTCTTTTACCTGTCTATGCATGGGCACAGCAGATGAGGCCACTATTTTCTAGTGAAGGCTGTAAAACAGATT  
GTCTGGTATCCCTGGTTAGAGGATTAAGTGAAGTCAAGGAACTCAGAGGAAGTGTAACTGTCCATTTTATGTT  
CTCTTTAGATCCTTCAAGGGTCCAGGGTCTGTTATTGGATGAATGCTTTATAAGAGCCTTTGGGTTTCTGTAAC  
TTTCTGTAACATGAGATCAGGTTTTTTTTTTTTTTGAATCTCTCGTCTTCATAGGGTTTTGGGCACCTGAACTTGT  
CCGATTCTGTATATGGAGCCCTGGAGTCACAAAATCCCTCGAGTCTCTGCTGGCCAAGTCTTCCCCTGTTAGTTA  
AGGTGTAAAATCCAGTTGGGGGACAGTGAAGGGAGTCCAAGGCTATGGAGGCTGTGAAATAAGTTGCGGTAGG  
GTATCACTATTCTTGGACTACCTTAAGGGTGTCCAGGCACTGGAGGATGTGAAACCTGTGGTATGTGGTCATA  
GTGTCAAGTCTGGGCTGAGGCTCACTGCTATTTCTCCACATGCTTGTCTATTTGATCATTAAAGGAAATTGTTCAAGA  
AACATTAATAGATGACTGCCCTTAAAGGGACGGTGAATGTAAGTGGCAAAGTGAAGTGTAAACAAGAAACGCT  
TATGCAGCATCCCTCCTGAGAATTGTGGACATATAAGAAGGCACATCACAAAGAATATAAGTTACAGTGGCCTCAG  
AAATCAAGTAAAGTTTGAAGAAAGGCTGTCTCAAGCCTTCTCAGGCCATTCCCAGCCTAGATGATTGCTGTTCTCT

TGCCTGCACAGGCCAATCTGGAGTGTGCAGTTTGGCTTTCCTCCTGTTTGCACTGGCCAGTCCTGAGCTACCTCATA  
TTAGCAGGGCAATCATCCAAAATTTCTGAATAAGGAGGGACCCAGAGGACCCTCATCTTTAGGGTTCAGAGTGCT  
ACCTGGTTTGGTGCCCACTCTAAGGGTTCATGACAAGGAATTGTTGAAGGCAAAGCATGGTTGGAAATTAAGGAC  
ATGGTGTCTTAGGAAACTATGCTCTGAAGTCCATCTTAATCCAGGATAGATCCCTCTAACCTAAGGTCATCAGTGA  
GTGTTGCAGTGATGTTTGTCTGTCTCATAACTGAATGGGAAAGGCTTATCCATACCCTTGCTCCTCACAGGCTAT  
GGGGCTAAACAAACTGGCATATTTGCTAGGGAAAGAACAGGTGTTAATATTTGAATAGAACATAGAATGCATG  
GAATAGATATCACAGATATTATTTGCAATTTTAAATCTACCTCTCCTAGATAAATCTGTGATAACTGGATGCTGAAA  
GACATCTCTAAATTAATAATACTTACTGCAATATCATTATTGTGCAATTAATATGCTATTGTTTCAGAGAATAA  
GGGCAGAACTTTAGTAATCTCTTTATAGTACAAATGAAAGTTTTATTTCAAATACTTATATCTGTGTTTGACTAGATT  
CAGAACACAGACAAAGATGGAATCCTGAAAATAGCACTTGTGGCCTTAAACAATTGCTTTGCTGTGCACAGTTAGT  
GAGTTAGGTTCTATTACTTTTTTCATATTTGGATTGCTTGTGGAAGTTCATATAATTCTCCTGAAGGACAACAGGCA  
AATGGCTCACATCAGTGGCAACACATGGACCATTGAGTTTGTGAGTCCAATGATGCAGCCGGTATATAGTTGCACAGA  
ATGATTTATTAACCCTTAGTTAACTGATTCTTTGAGAGGTCATGTTTTATAGAAATTGATACACTAAAAAAGTGT  
AAAATTGAGGCTATAAGTGAAGATCCTTCTTACTGACACAGAACTTTGTTTGCCTGTTGCATACCTTGCCAGTTT  
TCTAAGAGCAGTTTTTGTCTTGGATGAAAGGTGTTTATTTGGCTCCTCTCTTTGATTTTTCTGAAGGATTTCCGG  
TTTCCCTTTGGCTACACAGCAATAAAGTCTTGCATCATTGAGAAACACAGGGGCACTTCTAATATCTAATTATTTCC  
TTGTGTCATTGCCTCAATGCTATGCCATAAGTTCTTCTTCTTGGAAATCCTGAATGCTTTAGCACCCCTTTTCTTTGT  
TTAACTCTAATTTATCTCAGTAGTTTATATTTAAAAGCCATTTACTGTCAGAATATCCACTCATTTCTACAATAGGG  
GGTAACTTGTATTCTGGATAATTCTGTATTCACTGTGCTTTTCTGAATTTCCAGTTGGTCTTTTTACATCTTTGAAAAC  
ATTAATTTAAGTACCAGAATAATCCTGCTAGGCATGAAGAACTTGTGTCATGGTAAAATGGGTAGGAAATTATAA  
GTATCAATTCAGATAATATATACCTTTTGAGAATTAGCTTCACATTTCTAATGTCCGAACAAAATAGCTTTCTTAATT  
TAAGTTACAGTTGCTATGTTTCACTCAGATAATCTATAAAGGCAAAAATGAGTAGTGGTTTATAAATGAAGAAATGT  
CTGCATTAAGCATGATAATATTGAAAAGAAATTACAATTTTTCACTTTGAAATTAATCTCTGAAGATGATAACTTA  
ACTTGTGTTTGGAAAAGATTTCTGTGAATTTTTAAAAATATCATTATTAATATCAGCAGTATAAAGTTGTTCAAACA  
AAATGACTTTTATTCAATTGTAATTTAATAACGAAAATAACTGAATAGTAGGTTTGTAGCATTGACACAGTAATTA  
ATATTCTTTAATAAAGCTTTTAAATTCTGTTCAATTTCTTTGTGTCAGAGTACAAAGCAATAAAGATTCCTTAGAGCATTT  
TCACAAATATGCTTTTATTGGTTAACTTATTGCAATGTGTAATAGAAAAATCCACTGTTGTCTTGGTGATTTCCAAA  
TTTATTCTGTCTGTCTCTGTCTCCATCTCTGTCTCCGTCTCCATGTCCCTCTCTCTCTCTCTCTCTCTCTCTCTCTC  
TCTCTCTCTCTCTCTCTCTCCCTCTGTGTGTGTATGTGTGTGTGTGAGTGTGTTGTGTGTGTGTAGAATGGCTGA  
GACAGAATGGGGGTGGATCTCAATGGCATGTATGTATAATGTTTTATCATGTATGAAGCTGTACATATATATCATA  
TGACACACACACAAACACACACACATATATATGTGTGTATATGTATGTGTGTATATGTGTATAATGTATATATATG  
TATATG
